# Supplementary material for: ATAC-seq reveals regional differences in enhancer accessibility during the establishment of spatial coordinates in the Drosophila blastoderm
Source: HighWire-hosted journal article supplement (doi:10.1101/gr.242362.118), 2019-04-08
Supplement: Supplemental_Table_S1.xlsx [file Supplemental_Table_S1.xlsx]

## Sheet: Data
Expression construct	Tagged domain	Basal promoter	Enhancer name	Corresponding REDfly identifier	Identified by	Target gene	Expression domain of the target gene
hb_anterior_Hs34_UNC84-3xFLAG	D1	Hs43	hb_anterior_actv	hb_1.2	Schröder et al. 1988	hunchback	anterior domain
eve_stripe2_DSCP_UNC84-3xFLAG	D2	DSCP	eve_stripe2	eve_stripe2	Small et al. 1992	even skipped	stripe 2
eve_stripe1_DSCP_UNC84-3xFLAG	D3	DSCP	eve_1_ru	eve_stripe1_construct1/2	Fujioka et al. 1999	even skipped	stripe 1
D_central_Hs43_UNC84-3xFLAG	D4	Hs43	D_(+4)	D_(+5)	Schroeder et al. 2004	Dichaete	central domain
Kr_central_Hs43_UNC84-3xFLAG	D5	Hs43	Kr_CD1_ru	Kr_CD1	Hoch et al. 1990	Kruppel	central domain
eve_stripe5_DSCP_UNC84-3xFLAG	D6	DSCP	eve_stripe5	eve_stripe5	Fujioka et al. 1999	even skipped	stripe 5
gt_posterior_Hs43_UNC84_3xFLAG	D7	Hs43	gt_(-3)	gt_-3_construct	Schroeder et al. 2004	giant	posterior domain

## Sheet: README
A list of seven expression constructs.
Expression construct	Name of the expression construct used for generation of transgenic strains.
Tagged domain	Name of the corresponding tagged domain.
Basal promoter	Name of the basal promoter used for driving the nuclear tag protein.
Enhancer name	Name of the enhancer used as a driver of the nuclear tag protein (as in Segal et al. 2008).
Corresponding REDfly identifier	REDfly identifier of the enhancer (REDfly v. 5.4.3, Gallo et al. 2011)
Identified by	Reference of the original study that identified and characterized the enhancer
Target gene	Name of the enhancer's target gene
Expression domain of the target gene	Corresponding expression domain of the target gene
References:
Fujioka M, Emi-sarker Y, Yusibova GL, Goto T, Jaynes JB. 1999. Analysis of an even-skipped rescue transgene reveals both composite and discrete neuronal and early blastoderm enhancers , and multi-stripe positioning by gap gene repressor gradients *. 2538: 2527–2538.
Gallo SM, Gerrard DT, Miner D, Simich M, Des Soye B, Bergman CM, Halfon MS. 2011. REDfly v3.0: Toward a comprehensive database of transcriptional regulatory elements in Drosophila. Nucleic Acids Res 39: 118–123.
Hoch M, Schröder C, Seifert E, Jäckle H. 1990. cis-acting control elements for Krüppel expression in the Drosophila embryo. EMBO J 9: 2587–95.
Schröder C, Tautz D, Seifert E, Jäckle H. 1988. Differential regulation of the two transcripts from the Drosophila gap segmentation gene hunchback. EMBO J 7: 2881–7.
Schroeder MD, Pearce M, Fak J, Fan H, Unnerstall U, Emberly E, Rajewsky N, Siggia ED, Gaul U. 2004. Transcriptional control in the segmentation gene network of Drosophila. PLoS Biol 2: e271.
Segal E, Raveh-Sadka T, Schroeder M, Unnerstall U, Gaul U. 2008. Predicting expression patterns from regulatory sequence in Drosophila segmentation. Nature 451: 535–540.
Small S, Blair A, Levine M. 1992. Regulation of even-skipped stripe 2 in the Drosophila embryo. EMBO J 11: 4047–57
