# Supplementary material for: ATAC-seq reveals regional differences in enhancer accessibility during the establishment of spatial coordinates in the Drosophila blastoderm
Source: HighWire-hosted journal article supplement (doi:10.1101/gr.242362.118), 2019-04-08
Supplement: Supplemental_Table_S3.xlsx [file Supplemental_Table_S3.xlsx]

## Sheet: Data
Sample name	Corresponding domain	Expression construct	Homozygous transgenic line	Scaling factor (transposase cuts)	Scaling factor (coverage 1-100 bp)
D1 Rep1	D1	hb_anterior_Hs34_UNC84-3xFLAG	D1 line A	1.2886	1.3018
D1 Rep2	D1	hb_anterior_Hs34_UNC84-3xFLAG	D1 line B	0.925849	0.85448
D2 Rep1	D2	eve_stripe2_DSCP_UNC84-3xFLAG	D2 line A	0.963079	1.03628
D2 Rep2	D2	eve_stripe2_DSCP_UNC84-3xFLAG	D2 line B	0.477159	0.484472
D3 Rep1	D3	eve_stripe1_DSCP_UNC84-3xFLAG	D3 line A	0.739208	0.739336
D3 Rep2	D3	eve_stripe1_DSCP_UNC84-3xFLAG	D3 line A	0.483203	0.422412
D4 Rep1	D4	D_central_Hs43_UNC84-3xFLAG	D4 line A	1.53883	1.61782
D4 Rep2	D4	D_central_Hs43_UNC84-3xFLAG	D4 line B	1.06539	0.950975
D5 Rep1	D5	Kr_central_Hs43_UNC84-3xFLAG	D5 line A	1.46206	1.53932
D5 Rep2	D5	Kr_central_Hs43_UNC84-3xFLAG	D5 line B	1.24765	1.25297
D6 Rep1	D6	eve_stripe5_DSCP_UNC84-3xFLAG	D6 line A	0.669912	0.586532
D6 Rep2	D6	eve_stripe5_DSCP_UNC84-3xFLAG	D6 line B	0.577792	0.582281
D7 Rep1	D7	gt_posterior_Hs43_UNC84_3xFLAG	D7 line A	0.848577	0.840451
D7 Rep2	D7	gt_posterior_Hs43_UNC84_3xFLAG	D7 line B	0.777437	0.710685
D1 control Rep1	whole-embryo	hb_anterior_Hs34_UNC84-3xFLAG	D1 line A	1.36813	1.39006
D1 control Rep2	whole-embryo	hb_anterior_Hs34_UNC84-3xFLAG	D1 line B	1.22675	1.29217
D4 control Rep1	whole-embryo	D_central_Hs43_UNC84-3xFLAG	D4 line A	1.30762	1.30806
D4 control Rep2	whole-embryo	D_central_Hs43_UNC84-3xFLAG	D4 line B	1.23094	1.31545
D5 control Rep1	whole-embryo	Kr_central_Hs43_UNC84-3xFLAG	D5 line A	1.53098	1.57604
D5 control Rep2	whole-embryo	Kr_central_Hs43_UNC84-3xFLAG	D5 line B	1.12915	1.24725
D7 control Rep1	whole-embryo	gt_posterior_Hs43_UNC84_3xFLAG	D7 line A	1.28949	1.35033
D7 control Rep2	whole-embryo	gt_posterior_Hs43_UNC84_3xFLAG	D7 line B	1.15405	1.24003
gDNA control Rep1	purified genomic DNA	wild-type	wild-type	NA	NA

## Sheet: README
Summary of all ATAC-seq samples generated in this study.
Sample name	Name of the ATAC-seq sample
Corresponding domain	Analyzed domain of the blastoderm embryo
Expression construct	Name of the expression construct
Homozygous transgenic line	Corresponding transgenic line
Scaling factor (transposase cuts)	Scaling factor used for normalization of ATAC-seq signal: based on the total count of Tn5 transposase cuts
Scaling factor (coverage 1-100 bp)	Scaling factor used for normalization of ATAC-seq signal: based on coverage of 1-100 bp fragments
