# Supplementary material for: ATAC-seq reveals regional differences in enhancer accessibility during the establishment of spatial coordinates in the Drosophila blastoderm
Source: HighWire-hosted journal article supplement (doi:10.1101/gr.242362.118), 2019-04-08
Supplement: Supplemental_Table_S4.xlsx [file Supplemental_Table_S4.xlsx]

## Sheet: Data
chr	start	end	ID	annotation
2L	5553	5792	Peak1	intergenic
2L	6596	6837	Peak2	intergenic
2L	7517	9418	Peak3	promoter
2L	11784	13025	Peak4	CDS
2L	13504	14895	Peak5	CDS
2L	14951	15647	Peak6	CDS
2L	16976	17221	Peak7	intron
2L	17452	17654	Peak8	intron
2L	18267	19291	Peak9	promoter
2L	20527	20776	Peak10	intron
2L	21639	22588	Peak11	CDS
2L	22730	23554	Peak12	CDS
2L	26405	29156	Peak13	CDS
2L	30356	31182	Peak14	CDS
2L	32658	32868	Peak15	CDS
2L	33657	34425	Peak16	CDS
2L	35013	35279	Peak17	CDS
2L	35476	36678	Peak18	CDS
2L	37449	37668	Peak19	CDS
2L	38128	38381	Peak20	CDS
2L	43214	43595	Peak21	intron
2L	43991	44486	Peak22	intron
2L	45351	45595	Peak23	intron
2L	53656	53958	Peak24	intron
2L	54999	55424	Peak25	intron
2L	58027	58231	Peak26	UTR
2L	65784	65998	Peak27	intergenic
2L	66427	67606	Peak28	promoter
2L	69374	69613	Peak29	CDS
2L	76844	77074	Peak30	CDS
2L	77200	77412	Peak31	CDS
2L	77811	78150	Peak32	intergenic
2L	78853	79261	Peak33	intergenic
2L	80624	80815	Peak34	intergenic
2L	81155	81386	Peak35	intergenic
2L	81990	82339	Peak36	intergenic
2L	83248	84312	Peak37	CDS
2L	86377	86685	Peak38	intron
2L	86829	87094	Peak39	intron
2L	87246	87881	Peak40	promoter
2L	88527	90017	Peak41	intergenic
2L	90076	90529	Peak42	intergenic
2L	90666	92543	Peak43	intergenic
2L	94598	95139	Peak44	promoter
2L	95211	95587	Peak45	CDS
2L	102157	102971	Peak46	promoter
2L	104528	104828	Peak47	CDS
2L	106193	106868	Peak48	promoter
2L	107383	108436	Peak49	promoter
2L	108650	109637	Peak50	promoter
2L	110976	111248	Peak51	CDS
2L	111885	112077	Peak52	CDS
2L	114498	114989	Peak53	promoter
2L	115127	115572	Peak54	intron
2L	120516	120739	Peak55	promoter
2L	121463	121677	Peak56	intron
2L	124262	124982	Peak57	CDS
2L	129036	129309	Peak58	promoter
2L	138199	138398	Peak59	intron
2L	141257	141500	Peak60	CDS
2L	143033	144056	Peak61	promoter
2L	149788	150031	Peak62	intron
2L	154301	157591	Peak63	promoter
2L	157855	159434	Peak64	promoter
2L	159515	159794	Peak65	UTR
2L	160302	162373	Peak66	intron
2L	162685	162990	Peak67	CDS
2L	163163	163751	Peak68	intron
2L	165179	167186	Peak69	intron
2L	167753	167985	Peak70	intron
2L	168134	168386	Peak71	intron
2L	168553	168823	Peak72	intron
2L	169145	169854	Peak73	intron
2L	170474	170675	Peak74	intron
2L	171441	172017	Peak75	intron
2L	172541	173362	Peak76	intron
2L	175555	176202	Peak77	intron
2L	178251	178368	Peak78	intron
2L	178479	178657	Peak79	intron
2L	178726	179557	Peak80	intron
2L	180111	181900	Peak81	intron
2L	182223	184585	Peak82	promoter
2L	184747	186037	Peak83	CDS
2L	186222	186987	Peak84	CDS
2L	187929	188111	Peak85	CDS
2L	189180	189618	Peak86	CDS
2L	189906	190105	Peak87	CDS
2L	190292	190670	Peak88	CDS
2L	192679	193285	Peak89	CDS
2L	193425	193729	Peak90	CDS
2L	193957	194113	Peak91	CDS
2L	194318	194510	Peak92	CDS
2L	194608	195028	Peak93	CDS
2L	195116	196312	Peak94	CDS
2L	196410	196830	Peak95	CDS
2L	197108	197242	Peak96	CDS
2L	197361	197499	Peak97	CDS
2L	198120	199846	Peak98	CDS
2L	199928	200006	Peak99	intergenic
2L	200181	201476	Peak100	CDS
2L	202050	202278	Peak101	UTR
2L	203341	204682	Peak102	promoter
2L	204942	205623	Peak103	CDS
2L	205790	206205	Peak104	CDS
2L	206937	208574	Peak105	promoter
2L	208731	210783	Peak106	CDS
2L	211343	211613	Peak107	UTR
2L	211713	216013	Peak108	CDS
2L	216078	218209	Peak109	CDS
2L	218268	218854	Peak110	CDS
2L	219368	225779	Peak111	promoter
2L	226000	226952	Peak112	CDS
2L	227162	228521	Peak113	CDS
2L	229007	229438	Peak114	CDS
2L	229807	230012	Peak115	intron
2L	230456	231153	Peak116	CDS
2L	231821	232183	Peak117	CDS
2L	232380	232425	Peak118	intergenic
2L	232487	232795	Peak119	promoter
2L	232860	233099	Peak120	CDS
2L	233156	235083	Peak121	CDS
2L	235502	235664	Peak122	CDS
2L	235779	236665	Peak123	CDS
2L	236744	236804	Peak124	intergenic
2L	236919	237119	Peak125	CDS
2L	237577	237802	Peak126	CDS
2L	238259	238695	Peak127	CDS
2L	239269	242178	Peak128	CDS
2L	242254	242644	Peak129	UTR
2L	243276	243963	Peak130	intron
2L	244128	245090	Peak131	intron
2L	245267	248048	Peak132	intron
2L	248116	252521	Peak133	promoter
2L	252618	253472	Peak134	CDS
2L	253536	253814	Peak135	CDS
2L	254578	254745	Peak136	intron
2L	261586	261854	Peak137	intron
2L	267236	267620	Peak138	promoter
2L	270120	270530	Peak139	CDS
2L	270816	271118	Peak140	CDS
2L	271633	272176	Peak141	promoter
2L	272556	272590	Peak142	intergenic
2L	273187	274648	Peak143	promoter
2L	274939	275114	Peak144	CDS
2L	276591	279813	Peak145	promoter
2L	279980	280801	Peak146	CDS
2L	281059	281516	Peak147	CDS
2L	281747	283323	Peak148	promoter
2L	283746	284307	Peak149	CDS
2L	284604	285143	Peak150	CDS
2L	285510	285929	Peak151	promoter
2L	286160	287143	Peak152	promoter
2L	291672	291891	Peak153	promoter
2L	292322	293089	Peak154	promoter
2L	293164	294773	Peak155	promoter
2L	294975	295836	Peak156	promoter
2L	295981	296292	Peak157	CDS
2L	296373	296767	Peak158	CDS
2L	297340	297598	Peak159	UTR
2L	297685	298582	Peak160	promoter
2L	305609	306029	Peak161	promoter
2L	346250	346440	Peak162	UTR
2L	346676	347177	Peak163	UTR
2L	355847	358143	Peak164	promoter
2L	368748	368992	Peak165	intergenic
2L	376571	376985	Peak166	intergenic
2L	377721	378124	Peak167	promoter
2L	403667	404572	Peak168	promoter
2L	410097	410574	Peak169	CDS
2L	412769	413016	Peak170	promoter
2L	414540	415591	Peak171	promoter
2L	419119	420606	Peak172	promoter
2L	420937	421679	Peak173	promoter
2L	422707	423047	Peak174	intergenic
2L	430534	430734	Peak175	intergenic
2L	430794	432197	Peak176	promoter
2L	441352	442765	Peak177	intron
2L	447117	447448	Peak178	CDS
2L	452621	453258	Peak179	promoter
2L	453367	453427	Peak180	intergenic
2L	455338	455674	Peak181	promoter
2L	478702	479403	Peak182	intron
2L	479746	479979	Peak183	intron
2L	480707	481509	Peak184	intron
2L	490119	490358	Peak185	intron
2L	491905	492580	Peak186	intron
2L	510533	511040	Peak187	intron
2L	514538	514796	Peak188	intron
2L	517568	519896	Peak189	intron
2L	520967	521386	Peak190	intron
2L	521577	522637	Peak191	intron
2L	522948	524111	Peak192	promoter
2L	524425	524859	Peak193	intron
2L	525521	525748	Peak194	intron
2L	531209	531906	Peak195	intron
2L	534564	535082	Peak196	intron
2L	537188	537409	Peak197	CDS
2L	538805	539002	Peak198	CDS
2L	539521	541249	Peak199	CDS
2L	541619	542715	Peak200	promoter
2L	543030	543221	Peak201	UTR
2L	543356	543454	Peak202	intergenic
2L	543517	544823	Peak203	promoter
2L	544996	545183	Peak204	promoter
2L	548115	548391	Peak205	CDS
2L	563960	564478	Peak206	promoter
2L	567792	568729	Peak207	promoter
2L	573841	574590	Peak208	promoter
2L	576843	577056	Peak209	promoter
2L	590012	590354	Peak210	intron
2L	594555	595402	Peak211	promoter
2L	597738	598195	Peak212	intergenic
2L	599328	599828	Peak213	intergenic
2L	600396	601028	Peak214	intergenic
2L	601425	602262	Peak215	intergenic
2L	602400	603210	Peak216	promoter
2L	606133	606402	Peak217	intergenic
2L	606475	606679	Peak218	intergenic
2L	606764	607072	Peak219	intergenic
2L	610193	610521	Peak220	intergenic
2L	619680	619939	Peak221	intergenic
2L	638908	639116	Peak222	intergenic
2L	660813	661093	Peak223	intron
2L	664339	664754	Peak224	intron
2L	667471	668046	Peak225	intron
2L	668911	669197	Peak226	intron
2L	671397	671873	Peak227	intron
2L	672162	672359	Peak228	intron
2L	685056	685305	Peak229	intron
2L	701656	702443	Peak230	intron
2L	704852	705114	Peak231	intron
2L	708172	708676	Peak232	intron
2L	712753	713109	Peak233	intron
2L	713252	713893	Peak234	intron
2L	714228	714537	Peak235	UTR
2L	714849	715623	Peak236	promoter
2L	717449	717725	Peak237	intergenic
2L	815862	816113	Peak238	promoter
2L	819807	820386	Peak239	promoter
2L	820710	821146	Peak240	CDS
2L	821281	822102	Peak241	promoter
2L	824781	824863	Peak242	intergenic
2L	825216	827066	Peak243	promoter
2L	827846	828139	Peak244	intron
2L	828258	828798	Peak245	intron
2L	830172	830411	Peak246	CDS
2L	831360	832134	Peak247	CDS
2L	832281	832908	Peak248	UTR
2L	833182	833521	Peak249	UTR
2L	833586	833921	Peak250	UTR
2L	834914	835227	Peak251	CDS
2L	836664	836894	Peak252	CDS
2L	836947	837105	Peak253	CDS
2L	837775	838150	Peak254	intron
2L	838278	838821	Peak255	intron
2L	839347	840367	Peak256	intron
2L	840490	840730	Peak257	intron
2L	843147	843441	Peak258	intron
2L	844588	844799	Peak259	intron
2L	845168	845188	Peak260	intergenic
2L	845292	845571	Peak261	intron
2L	846298	846712	Peak262	intron
2L	847695	848952	Peak263	intron
2L	849229	853343	Peak264	promoter
2L	855288	855797	Peak265	promoter
2L	856351	856528	Peak266	UTR
2L	856643	857086	Peak267	intergenic
2L	865660	866073	Peak268	promoter
2L	867017	868574	Peak269	promoter
2L	868693	869975	Peak270	promoter
2L	870301	873552	Peak271	promoter
2L	873730	874008	Peak272	intron
2L	874121	874491	Peak273	intron
2L	900923	901942	Peak274	CDS
2L	922558	922898	Peak275	promoter
2L	1006533	1006855	Peak276	intergenic
2L	1007260	1008368	Peak277	intergenic
2L	1050436	1050767	Peak278	UTR
2L	1051923	1052478	Peak279	CDS
2L	1052570	1052627	Peak280	intergenic
2L	1052687	1052902	Peak281	CDS
2L	1053129	1053360	Peak282	intron
2L	1055034	1055468	Peak283	intron
2L	1056400	1056765	Peak284	intron
2L	1057486	1057967	Peak285	intron
2L	1058662	1058882	Peak286	intron
2L	1060701	1060866	Peak287	intron
2L	1062003	1064249	Peak288	CDS
2L	1064495	1067186	Peak289	intron
2L	1067247	1067403	Peak290	intron
2L	1067585	1069175	Peak291	intron
2L	1069361	1069609	Peak292	intron
2L	1072258	1072451	Peak293	intron
2L	1074217	1074506	Peak294	intron
2L	1075496	1076255	Peak295	intron
2L	1076308	1078407	Peak296	promoter
2L	1080773	1081304	Peak297	promoter
2L	1108055	1108458	Peak298	promoter
2L	1115560	1115948	Peak299	CDS
2L	1116400	1116880	Peak300	CDS
2L	1116985	1118516	Peak301	intron
2L	1118641	1121158	Peak302	promoter
2L	1122115	1122624	Peak303	intron
2L	1128248	1129087	Peak304	promoter
2L	1129151	1129419	Peak305	promoter
2L	1142692	1143098	Peak306	intergenic
2L	1147737	1148066	Peak307	promoter
2L	1150401	1150945	Peak308	promoter
2L	1156207	1156784	Peak309	promoter
2L	1157285	1158349	Peak310	promoter
2L	1158577	1159199	Peak311	promoter
2L	1169714	1170003	Peak312	promoter
2L	1172653	1173263	Peak313	promoter
2L	1177548	1177808	Peak314	promoter
2L	1183884	1184201	Peak315	promoter
2L	1263977	1264276	Peak316	intron
2L	1360426	1360730	Peak317	intergenic
2L	1371452	1371735	Peak318	intergenic
2L	1375516	1375887	Peak319	intergenic
2L	1379416	1379985	Peak320	intergenic
2L	1380143	1380419	Peak321	UTR
2L	1380702	1383029	Peak322	CDS
2L	1383184	1383347	Peak323	intron
2L	1384935	1385293	Peak324	CDS
2L	1385477	1388800	Peak325	CDS
2L	1388950	1389602	Peak326	intron
2L	1389746	1390567	Peak327	intron
2L	1390796	1392525	Peak328	CDS
2L	1392622	1396343	Peak329	CDS
2L	1396594	1398723	Peak330	CDS
2L	1399280	1400641	Peak331	intron
2L	1400821	1401213	Peak332	intron
2L	1401422	1401543	Peak333	intron
2L	1401599	1401763	Peak334	intron
2L	1401948	1403419	Peak335	intron
2L	1403640	1404335	Peak336	intron
2L	1404645	1406564	Peak337	intron
2L	1406634	1408569	Peak338	intron
2L	1408772	1412878	Peak339	intron
2L	1413011	1415104	Peak340	intron
2L	1415251	1416698	Peak341	intron
2L	1416979	1417575	Peak342	intron
2L	1417670	1418052	Peak343	intron
2L	1418210	1418798	Peak344	intron
2L	1419093	1422455	Peak345	promoter
2L	1422546	1423126	Peak346	intergenic
2L	1425981	1426608	Peak347	intergenic
2L	1429430	1430043	Peak348	intergenic
2L	1430458	1430998	Peak349	intergenic
2L	1439691	1440067	Peak350	intergenic
2L	1450009	1450218	Peak351	intergenic
2L	1457087	1457428	Peak352	intergenic
2L	1458799	1459112	Peak353	intergenic
2L	1460821	1461349	Peak354	intergenic
2L	1461816	1462806	Peak355	intergenic
2L	1463194	1463884	Peak356	intergenic
2L	1464495	1464828	Peak357	intergenic
2L	1473139	1473396	Peak358	intergenic
2L	1474398	1474683	Peak359	intergenic
2L	1476532	1476759	Peak360	intergenic
2L	1478398	1479036	Peak361	intergenic
2L	1485866	1486466	Peak362	intergenic
2L	1492260	1492610	Peak363	promoter
2L	1502618	1503071	Peak364	promoter
2L	1504333	1504785	Peak365	intergenic
2L	1508175	1508539	Peak366	intergenic
2L	1510935	1511141	Peak367	intergenic
2L	1516965	1518537	Peak368	promoter
2L	1525030	1525593	Peak369	intergenic
2L	1554377	1554625	Peak370	intergenic
2L	1556765	1556970	Peak371	UTR
2L	1559712	1559921	Peak372	intron
2L	1611050	1611238	Peak373	promoter
2L	1613948	1614385	Peak374	promoter
2L	1654338	1654576	Peak375	intron
2L	1669676	1669965	Peak376	intron
2L	1688375	1688615	Peak377	intron
2L	1704762	1705037	Peak378	promoter
2L	1709966	1710863	Peak379	promoter
2L	1715534	1716022	Peak380	promoter
2L	1723734	1723957	Peak381	intron
2L	1724272	1724487	Peak382	promoter
2L	1727967	1728181	Peak383	UTR
2L	1728351	1728558	Peak384	promoter
2L	1728638	1728875	Peak385	promoter
2L	1732205	1732630	Peak386	promoter
2L	1736931	1737527	Peak387	promoter
2L	1752004	1752199	Peak388	promoter
2L	1755978	1756179	Peak389	CDS
2L	1759020	1759232	Peak390	promoter
2L	1884342	1885507	Peak391	promoter
2L	1886295	1887257	Peak392	intron
2L	1909751	1910177	Peak393	UTR
2L	1938037	1938503	Peak394	intron
2L	1954372	1955178	Peak395	promoter
2L	1957341	1957825	Peak396	intron
2L	1957996	1958741	Peak397	intron
2L	1960943	1961281	Peak398	intron
2L	1962124	1962417	Peak399	intron
2L	1969111	1969296	Peak400	intron
2L	1970356	1970987	Peak401	promoter
2L	1972471	1973542	Peak402	intergenic
2L	1973975	1974649	Peak403	promoter
2L	1982049	1982309	Peak404	promoter
2L	2008883	2010345	Peak405	promoter
2L	2010579	2011137	Peak406	intron
2L	2013048	2013501	Peak407	intron
2L	2013616	2014486	Peak408	intron
2L	2031522	2031814	Peak409	intergenic
2L	2035882	2036107	Peak410	promoter
2L	2037475	2038709	Peak411	promoter
2L	2045083	2045633	Peak412	promoter
2L	2094449	2094670	Peak413	CDS
2L	2130306	2130564	Peak414	intergenic
2L	2144615	2145280	Peak415	promoter
2L	2146782	2147775	Peak416	promoter
2L	2152006	2152247	Peak417	CDS
2L	2154791	2155042	Peak418	CDS
2L	2155489	2156385	Peak419	promoter
2L	2157942	2158570	Peak420	CDS
2L	2158633	2160592	Peak421	CDS
2L	2160970	2162048	Peak422	promoter
2L	2162222	2166067	Peak423	intron
2L	2166405	2167066	Peak424	intron
2L	2170347	2170507	Peak425	intron
2L	2170704	2171130	Peak426	intron
2L	2171903	2173319	Peak427	intron
2L	2173538	2173983	Peak428	intron
2L	2175368	2175842	Peak429	intron
2L	2176574	2177070	Peak430	intron
2L	2178134	2178975	Peak431	promoter
2L	2181406	2182536	Peak432	intergenic
2L	2182937	2183755	Peak433	intergenic
2L	2189304	2189695	Peak434	intergenic
2L	2190780	2190952	Peak435	CDS
2L	2191390	2191659	Peak436	intron
2L	2191817	2192583	Peak437	promoter
2L	2195490	2195711	Peak438	intron
2L	2196430	2197431	Peak439	intron
2L	2197596	2197980	Peak440	promoter
2L	2198583	2198782	Peak441	intergenic
2L	2200355	2200554	Peak442	intergenic
2L	2201501	2201789	Peak443	intergenic
2L	2202088	2202958	Peak444	intergenic
2L	2216216	2216428	Peak445	promoter
2L	2217144	2217670	Peak446	promoter
2L	2221850	2222157	Peak447	promoter
2L	2226441	2227114	Peak448	promoter
2L	2236750	2237100	Peak449	promoter
2L	2293237	2293460	Peak450	intergenic
2L	2311495	2311733	Peak451	promoter
2L	2357277	2357890	Peak452	promoter
2L	2362812	2363020	Peak453	intron
2L	2363852	2365962	Peak454	promoter
2L	2366060	2366642	Peak455	CDS
2L	2370287	2370824	Peak456	CDS
2L	2374505	2374819	Peak457	promoter
2L	2375697	2376747	Peak458	promoter
2L	2380524	2380914	Peak459	intergenic
2L	2380975	2381350	Peak460	promoter
2L	2388585	2388840	Peak461	intergenic
2L	2447989	2448731	Peak462	intron
2L	2449511	2450302	Peak463	promoter
2L	2450783	2451584	Peak464	promoter
2L	2451760	2451967	Peak465	intron
2L	2453407	2453815	Peak466	intron
2L	2454281	2455348	Peak467	promoter
2L	2455530	2455709	Peak468	CDS
2L	2456264	2457544	Peak469	intron
2L	2457688	2458680	Peak470	CDS
2L	2459262	2459489	Peak471	UTR
2L	2459859	2460121	Peak472	intergenic
2L	2460972	2461154	Peak473	intergenic
2L	2461345	2461784	Peak474	intergenic
2L	2461998	2462774	Peak475	intergenic
2L	2492502	2493452	Peak476	promoter
2L	2493652	2494408	Peak477	intron
2L	2494517	2494807	Peak478	intron
2L	2524436	2524643	Peak479	intergenic
2L	2574613	2575371	Peak480	promoter
2L	2575568	2580638	Peak481	promoter
2L	2585306	2585591	Peak482	promoter
2L	2612020	2612412	Peak483	intergenic
2L	2677485	2677830	Peak484	promoter
2L	2739885	2740135	Peak485	promoter
2L	2748268	2748847	Peak486	promoter
2L	2749267	2751948	Peak487	promoter
2L	2752149	2756343	Peak488	promoter
2L	2756583	2758306	Peak489	UTR
2L	2758508	2760441	Peak490	promoter
2L	2765579	2766551	Peak491	promoter
2L	2766687	2766939	Peak492	CDS
2L	2767362	2768207	Peak493	promoter
2L	2768720	2768930	Peak494	CDS
2L	2769029	2769344	Peak495	CDS
2L	2769513	2770708	Peak496	promoter
2L	2780346	2780577	Peak497	UTR
2L	2804676	2804991	Peak498	intergenic
2L	2807312	2807561	Peak499	intron
2L	2807973	2808461	Peak500	promoter
2L	2814665	2815402	Peak501	CDS
2L	2822687	2822904	Peak502	intron
2L	2855476	2855897	Peak503	promoter
2L	2856001	2856618	Peak504	promoter
2L	2856720	2857780	Peak505	promoter
2L	2858059	2858338	Peak506	intron
2L	2861459	2861857	Peak507	intron
2L	2862275	2862728	Peak508	promoter
2L	2873123	2875575	Peak509	promoter
2L	2876140	2876355	Peak510	CDS
2L	2878041	2879483	Peak511	promoter
2L	2883012	2883270	Peak512	promoter
2L	2884185	2884609	Peak513	intron
2L	2884795	2886633	Peak514	promoter
2L	2886701	2887314	Peak515	intron
2L	2887982	2888405	Peak516	promoter
2L	2888498	2889558	Peak517	intron
2L	2894109	2894647	Peak518	intron
2L	2896986	2897570	Peak519	intron
2L	2898307	2898539	Peak520	intron
2L	2900475	2900782	Peak521	intron
2L	2907739	2908258	Peak522	intron
2L	2908766	2909358	Peak523	intron
2L	2909490	2909883	Peak524	intron
2L	2915030	2915368	Peak525	intron
2L	2920243	2920459	Peak526	intron
2L	2945746	2946203	Peak527	intron
2L	2955671	2955971	Peak528	intron
2L	2956948	2957405	Peak529	intron
2L	2957942	2958303	Peak530	intron
2L	2967041	2967273	Peak531	UTR
2L	2968595	2968824	Peak532	CDS
2L	2969286	2969806	Peak533	promoter
2L	2971980	2972654	Peak534	promoter
2L	2972754	2972988	Peak535	promoter
2L	2976959	2977599	Peak536	promoter
2L	2978737	2979390	Peak537	promoter
2L	2979721	2980362	Peak538	CDS
2L	2987198	2987877	Peak539	promoter
2L	2987935	2988661	Peak540	promoter
2L	2988789	2989445	Peak541	CDS
2L	2990138	2990813	Peak542	CDS
2L	2992426	2993116	Peak543	promoter
2L	2993178	2993792	Peak544	intron
2L	2998726	3001200	Peak545	promoter
2L	3004985	3005291	Peak546	intron
2L	3005382	3005972	Peak547	intron
2L	3006941	3007393	Peak548	intron
2L	3008921	3009267	Peak549	intron
2L	3018190	3018513	Peak550	promoter
2L	3018703	3018921	Peak551	UTR
2L	3022776	3023465	Peak552	promoter
2L	3025820	3026291	Peak553	CDS
2L	3028767	3029384	Peak554	promoter
2L	3030389	3030653	Peak555	promoter
2L	3037419	3037649	Peak556	promoter
2L	3039834	3040083	Peak557	promoter
2L	3041828	3042071	Peak558	UTR
2L	3048247	3049133	Peak559	CDS
2L	3055874	3056069	Peak560	UTR
2L	3059060	3059342	Peak561	intron
2L	3067692	3067972	Peak562	UTR
2L	3068849	3069281	Peak563	UTR
2L	3069367	3072965	Peak564	promoter
2L	3078277	3079093	Peak565	intron
2L	3079458	3079796	Peak566	intron
2L	3080309	3080854	Peak567	CDS
2L	3082676	3083348	Peak568	intron
2L	3083450	3084068	Peak569	intron
2L	3094975	3095248	Peak570	intron
2L	3131702	3131938	Peak571	intron
2L	3145577	3145834	Peak572	promoter
2L	3147603	3147878	Peak573	CDS
2L	3152654	3153296	Peak574	promoter
2L	3158034	3158312	Peak575	intron
2L	3158709	3158949	Peak576	intron
2L	3159081	3159779	Peak577	promoter
2L	3163604	3163848	Peak578	promoter
2L	3163920	3164128	Peak579	CDS
2L	3165280	3165662	Peak580	intron
2L	3169473	3169771	Peak581	intergenic
2L	3169940	3170460	Peak582	CDS
2L	3170621	3170890	Peak583	CDS
2L	3170999	3171808	Peak584	promoter
2L	3172258	3173325	Peak585	UTR
2L	3199630	3199880	Peak586	promoter
2L	3265682	3265899	Peak587	intergenic
2L	3302120	3302385	Peak588	intron
2L	3303015	3303516	Peak589	promoter
2L	3303622	3303821	Peak590	intergenic
2L	3319810	3320038	Peak591	promoter
2L	3372552	3372855	Peak592	intron
2L	3373299	3373604	Peak593	promoter
2L	3376646	3377075	Peak594	promoter
2L	3422931	3423149	Peak595	promoter
2L	3426012	3426404	Peak596	intron
2L	3452360	3452700	Peak597	promoter
2L	3456624	3457444	Peak598	promoter
2L	3465294	3466546	Peak599	promoter
2L	3469546	3470192	Peak600	promoter
2L	3472310	3472686	Peak601	promoter
2L	3475405	3475652	Peak602	intergenic
2L	3476254	3476928	Peak603	intergenic
2L	3477717	3477916	Peak604	intergenic
2L	3478091	3478752	Peak605	promoter
2L	3491026	3491256	Peak606	promoter
2L	3530261	3530531	Peak607	promoter
2L	3532432	3532641	Peak608	UTR
2L	3532950	3533313	Peak609	intergenic
2L	3533381	3533699	Peak610	intergenic
2L	3538555	3539266	Peak611	promoter
2L	3539354	3540309	Peak612	promoter
2L	3541088	3541634	Peak613	intron
2L	3541726	3542279	Peak614	intron
2L	3545471	3545915	Peak615	CDS
2L	3548850	3550218	Peak616	intergenic
2L	3553034	3553252	Peak617	intergenic
2L	3556205	3556429	Peak618	intergenic
2L	3579665	3580361	Peak619	CDS
2L	3580523	3581263	Peak620	promoter
2L	3588178	3588497	Peak621	intergenic
2L	3594196	3594445	Peak622	intergenic
2L	3602327	3603310	Peak623	intergenic
2L	3604297	3607486	Peak624	promoter
2L	3608393	3609731	Peak625	intergenic
2L	3610224	3611448	Peak626	intergenic
2L	3611852	3612167	Peak627	intergenic
2L	3614148	3615882	Peak628	intergenic
2L	3616348	3616559	Peak629	intergenic
2L	3618161	3618527	Peak630	intergenic
2L	3618765	3619941	Peak631	promoter
2L	3631365	3631575	Peak632	intron
2L	3631660	3633251	Peak633	promoter
2L	3633584	3633853	Peak634	intron
2L	3655894	3656319	Peak635	intron
2L	3657312	3657782	Peak636	intergenic
2L	3657922	3658155	Peak637	intergenic
2L	3662388	3662784	Peak638	promoter
2L	3769542	3769838	Peak639	intergenic
2L	3770062	3770599	Peak640	intergenic
2L	3770920	3772266	Peak641	promoter
2L	3775479	3776099	Peak642	intron
2L	3776240	3776581	Peak643	intron
2L	3776842	3777138	Peak644	intron
2L	3778489	3779075	Peak645	promoter
2L	3786258	3786557	Peak646	UTR
2L	3803645	3804122	Peak647	intron
2L	3805694	3806800	Peak648	intron
2L	3811157	3811411	Peak649	CDS
2L	3813293	3813569	Peak650	promoter
2L	3817691	3818638	Peak651	intergenic
2L	3818708	3818980	Peak652	intergenic
2L	3821243	3821905	Peak653	intergenic
2L	3822221	3823160	Peak654	intergenic
2L	3824063	3824366	Peak655	intergenic
2L	3824684	3825014	Peak656	intergenic
2L	3825279	3827065	Peak657	promoter
2L	3827235	3827776	Peak658	intergenic
2L	3827982	3828181	Peak659	intergenic
2L	3829016	3829734	Peak660	intergenic
2L	3833685	3834512	Peak661	intergenic
2L	3835400	3835674	Peak662	intergenic
2L	3836383	3837016	Peak663	promoter
2L	3842894	3843085	Peak664	intergenic
2L	3845265	3845696	Peak665	intergenic
2L	3853257	3853635	Peak666	intergenic
2L	3854336	3854745	Peak667	intergenic
2L	3861192	3862041	Peak668	intergenic
2L	3862492	3863025	Peak669	promoter
2L	3867528	3867789	Peak670	promoter
2L	3872312	3872628	Peak671	promoter
2L	3895996	3896271	Peak672	promoter
2L	3914614	3915003	Peak673	intron
2L	4021952	4022316	Peak674	intergenic
2L	4028337	4028627	Peak675	intergenic
2L	4028702	4029165	Peak676	intergenic
2L	4030183	4030915	Peak677	intergenic
2L	4031133	4032182	Peak678	promoter
2L	4034038	4034932	Peak679	intron
2L	4035115	4035321	Peak680	intron
2L	4036547	4036722	Peak681	intron
2L	4037371	4037765	Peak682	intron
2L	4037978	4038356	Peak683	intron
2L	4040906	4041319	Peak684	intron
2L	4042856	4043852	Peak685	intron
2L	4044129	4044226	Peak686	intergenic
2L	4045127	4045543	Peak687	intron
2L	4045644	4046119	Peak688	intron
2L	4047113	4047390	Peak689	intron
2L	4047763	4048456	Peak690	intron
2L	4048997	4049249	Peak691	intron
2L	4049901	4051496	Peak692	intron
2L	4052414	4052988	Peak693	intron
2L	4053236	4053504	Peak694	intron
2L	4053603	4054564	Peak695	intron
2L	4054848	4056815	Peak696	intron
2L	4056940	4057342	Peak697	intron
2L	4058092	4058492	Peak698	intron
2L	4059381	4059747	Peak699	intron
2L	4060711	4061283	Peak700	intron
2L	4061526	4061793	Peak701	intron
2L	4063137	4063578	Peak702	intron
2L	4064631	4065271	Peak703	intron
2L	4065551	4066053	Peak704	intron
2L	4069181	4069574	Peak705	intron
2L	4069933	4070417	Peak706	intron
2L	4070483	4070564	Peak707	intergenic
2L	4070639	4071170	Peak708	intron
2L	4071300	4072180	Peak709	intron
2L	4073047	4073378	Peak710	intron
2L	4073440	4074068	Peak711	intron
2L	4074437	4075229	Peak712	CDS
2L	4075434	4075682	Peak713	intron
2L	4076190	4076412	Peak714	intron
2L	4076923	4077289	Peak715	intron
2L	4077907	4078386	Peak716	intron
2L	4079500	4081364	Peak717	CDS
2L	4081433	4081856	Peak718	intron
2L	4082114	4082506	Peak719	intron
2L	4082999	4083372	Peak720	intron
2L	4083875	4084262	Peak721	intron
2L	4084700	4085171	Peak722	intron
2L	4085374	4085607	Peak723	intron
2L	4086124	4086375	Peak724	intron
2L	4087105	4087320	Peak725	intron
2L	4088895	4089212	Peak726	intron
2L	4089481	4090447	Peak727	intron
2L	4093055	4094526	Peak728	intron
2L	4094882	4095208	Peak729	intron
2L	4096048	4096742	Peak730	intron
2L	4096822	4097317	Peak731	intron
2L	4097934	4098445	Peak732	CDS
2L	4099470	4100112	Peak733	CDS
2L	4100590	4101165	Peak734	CDS
2L	4101313	4101641	Peak735	intron
2L	4102937	4103136	Peak736	intron
2L	4104085	4104355	Peak737	intron
2L	4104484	4105418	Peak738	intron
2L	4115976	4116365	Peak739	intergenic
2L	4118649	4119015	Peak740	intergenic
2L	4120857	4121165	Peak741	CDS
2L	4121579	4121799	Peak742	promoter
2L	4123267	4123977	Peak743	CDS
2L	4127038	4127239	Peak744	intergenic
2L	4187671	4187920	Peak745	promoter
2L	4208643	4209005	Peak746	CDS
2L	4221094	4222184	Peak747	promoter
2L	4222295	4223079	Peak748	intergenic
2L	4223166	4223649	Peak749	intergenic
2L	4226560	4227170	Peak750	promoter
2L	4227582	4228039	Peak751	promoter
2L	4228150	4228352	Peak752	CDS
2L	4228458	4228475	Peak753	UTR
2L	4228653	4229106	Peak754	intergenic
2L	4279604	4279930	Peak755	intergenic
2L	4280413	4280926	Peak756	intergenic
2L	4281173	4283833	Peak757	promoter
2L	4284102	4284599	Peak758	promoter
2L	4286633	4287920	Peak759	intron
2L	4288614	4288837	Peak760	intron
2L	4312343	4312598	Peak761	intron
2L	4332261	4332463	Peak762	intergenic
2L	4333209	4334362	Peak763	promoter
2L	4334781	4335262	Peak764	intron
2L	4335719	4336330	Peak765	intron
2L	4340169	4340531	Peak766	intron
2L	4344860	4345224	Peak767	UTR
2L	4345750	4346077	Peak768	UTR
2L	4346665	4347179	Peak769	intergenic
2L	4350999	4351580	Peak770	intergenic
2L	4351831	4352324	Peak771	intergenic
2L	4353903	4354116	Peak772	UTR
2L	4354773	4355343	Peak773	intergenic
2L	4357821	4358038	Peak774	intergenic
2L	4363549	4364368	Peak775	intron
2L	4364458	4364718	Peak776	intron
2L	4366478	4367065	Peak777	intron
2L	4367731	4369449	Peak778	intron
2L	4369939	4371179	Peak779	intron
2L	4371320	4372651	Peak780	promoter
2L	4373076	4373591	Peak781	intron
2L	4373659	4374378	Peak782	intron
2L	4374892	4375700	Peak783	intron
2L	4377347	4377608	Peak784	intron
2L	4377721	4380364	Peak785	CDS
2L	4380792	4381156	Peak786	CDS
2L	4382424	4382855	Peak787	promoter
2L	4385745	4386179	Peak788	promoter
2L	4386941	4387300	Peak789	promoter
2L	4393758	4393957	Peak790	promoter
2L	4394088	4394333	Peak791	promoter
2L	4418934	4419213	Peak792	intron
2L	4444306	4444930	Peak793	promoter
2L	4448527	4449044	Peak794	promoter
2L	4452729	4453192	Peak795	promoter
2L	4453252	4453629	Peak796	CDS
2L	4454083	4454602	Peak797	promoter
2L	4456677	4456918	Peak798	promoter
2L	4457318	4458545	Peak799	promoter
2L	4458783	4460277	Peak800	promoter
2L	4462868	4463082	Peak801	promoter
2L	4463339	4463736	Peak802	promoter
2L	4463909	4464115	Peak803	CDS
2L	4464274	4464839	Peak804	CDS
2L	4465047	4465246	Peak805	promoter
2L	4533545	4533865	Peak806	CDS
2L	4568132	4568412	Peak807	intron
2L	4570426	4571113	Peak808	CDS
2L	4574490	4575029	Peak809	intron
2L	4591880	4592424	Peak810	promoter
2L	4594828	4595381	Peak811	promoter
2L	4597267	4598161	Peak812	intron
2L	4610613	4610933	Peak813	intron
2L	4614106	4614718	Peak814	promoter
2L	4684434	4684663	Peak815	promoter
2L	4808264	4808541	Peak816	intergenic
2L	4810112	4811119	Peak817	intergenic
2L	4811303	4812169	Peak818	intergenic
2L	4812287	4813430	Peak819	promoter
2L	4818117	4818407	Peak820	promoter
2L	4818638	4818826	Peak821	intergenic
2L	4819890	4822683	Peak822	promoter
2L	4823086	4824322	Peak823	intron
2L	4824588	4824880	Peak824	intron
2L	4825258	4825872	Peak825	CDS
2L	4826552	4827791	Peak826	CDS
2L	4828923	4830866	Peak827	promoter
2L	4830919	4831232	Peak828	CDS
2L	4837653	4839152	Peak829	promoter
2L	4843116	4843417	Peak830	CDS
2L	4846719	4847035	Peak831	promoter
2L	4847226	4847439	Peak832	promoter
2L	4850240	4850740	Peak833	promoter
2L	4853177	4853379	Peak834	intron
2L	4880282	4880498	Peak835	CDS
2L	4889315	4890022	Peak836	promoter
2L	4891405	4892502	Peak837	promoter
2L	4893106	4893605	Peak838	intron
2L	4898103	4898551	Peak839	intron
2L	4901690	4903430	Peak840	CDS
2L	4903491	4903747	Peak841	UTR
2L	4906670	4906886	Peak842	promoter
2L	4945521	4945748	Peak843	promoter
2L	4946218	4946435	Peak844	intron
2L	4949466	4949872	Peak845	promoter
2L	4955426	4955626	Peak846	promoter
2L	4967642	4967919	Peak847	promoter
2L	4968802	4969090	Peak848	promoter
2L	4969243	4969435	Peak849	CDS
2L	4971027	4971941	Peak850	promoter
2L	4973878	4974082	Peak851	promoter
2L	4976626	4977642	Peak852	promoter
2L	4981132	4981852	Peak853	promoter
2L	4991459	4991726	Peak854	CDS
2L	4994507	4994990	Peak855	CDS
2L	4995339	4996011	Peak856	promoter
2L	4999049	5001558	Peak857	promoter
2L	5004025	5004263	Peak858	intron
2L	5009324	5010216	Peak859	promoter
2L	5010740	5011433	Peak860	promoter
2L	5027390	5027661	Peak861	promoter
2L	5037349	5037813	Peak862	intergenic
2L	5042020	5042243	Peak863	intron
2L	5042472	5042793	Peak864	CDS
2L	5043029	5043402	Peak865	promoter
2L	5043531	5044022	Peak866	promoter
2L	5044219	5044579	Peak867	promoter
2L	5049990	5050274	Peak868	promoter
2L	5052424	5054333	Peak869	promoter
2L	5054567	5055945	Peak870	promoter
2L	5056073	5056616	Peak871	CDS
2L	5056803	5057192	Peak872	CDS
2L	5059475	5059930	Peak873	promoter
2L	5070932	5071320	Peak874	promoter
2L	5073349	5073886	Peak875	UTR
2L	5092704	5093700	Peak876	promoter
2L	5093870	5094210	Peak877	promoter
2L	5095538	5095741	Peak878	UTR
2L	5096208	5096545	Peak879	promoter
2L	5096608	5097041	Peak880	intron
2L	5100096	5100329	Peak881	promoter
2L	5185532	5185941	Peak882	CDS
2L	5186770	5186966	Peak883	intron
2L	5202518	5203019	Peak884	intron
2L	5209320	5209555	Peak885	UTR
2L	5218455	5218850	Peak886	CDS
2L	5220539	5220610	Peak887	intergenic
2L	5220736	5221646	Peak888	CDS
2L	5222277	5222756	Peak889	intron
2L	5223243	5223742	Peak890	intron
2L	5224052	5224285	Peak891	intron
2L	5224565	5224795	Peak892	intron
2L	5226562	5226942	Peak893	intron
2L	5230661	5230901	Peak894	intron
2L	5231035	5231323	Peak895	intron
2L	5232093	5232515	Peak896	intron
2L	5232974	5233171	Peak897	intron
2L	5233501	5234300	Peak898	intron
2L	5234961	5235568	Peak899	intron
2L	5236384	5238318	Peak900	promoter
2L	5238534	5238925	Peak901	intron
2L	5239351	5241569	Peak902	CDS
2L	5242840	5243222	Peak903	intron
2L	5253758	5253976	Peak904	intron
2L	5262536	5262872	Peak905	intron
2L	5269967	5270443	Peak906	CDS
2L	5271044	5271243	Peak907	intron
2L	5276360	5277665	Peak908	promoter
2L	5278093	5278181	Peak909	intergenic
2L	5278420	5278636	Peak910	promoter
2L	5278935	5279172	Peak911	promoter
2L	5288748	5289156	Peak912	promoter
2L	5292308	5292527	Peak913	intron
2L	5296910	5297217	Peak914	intron
2L	5305199	5305892	Peak915	promoter
2L	5306458	5306992	Peak916	intron
2L	5324579	5326089	Peak917	CDS
2L	5326159	5326506	Peak918	UTR
2L	5326577	5326900	Peak919	promoter
2L	5327534	5327742	Peak920	CDS
2L	5362414	5362871	Peak921	CDS
2L	5363740	5363908	Peak922	intron
2L	5381409	5381706	Peak923	intergenic
2L	5392061	5392343	Peak924	intergenic
2L	5400617	5400910	Peak925	intergenic
2L	5403399	5404169	Peak926	intergenic
2L	5406451	5406683	Peak927	intron
2L	5406883	5407291	Peak928	CDS
2L	5410180	5410812	Peak929	intron
2L	5414635	5414976	Peak930	intron
2L	5429412	5429665	Peak931	intergenic
2L	5455595	5455871	Peak932	intergenic
2L	5456937	5457155	Peak933	intergenic
2L	5460893	5461840	Peak934	promoter
2L	5464590	5464984	Peak935	intron
2L	5467800	5468146	Peak936	intergenic
2L	5473833	5474575	Peak937	intergenic
2L	5500174	5500758	Peak938	intergenic
2L	5524184	5524436	Peak939	promoter
2L	5525764	5526025	Peak940	promoter
2L	5526865	5527073	Peak941	promoter
2L	5527996	5528204	Peak942	promoter
2L	5539635	5540574	Peak943	CDS
2L	5541498	5541962	Peak944	CDS
2L	5542174	5543616	Peak945	promoter
2L	5545041	5545359	Peak946	CDS
2L	5546160	5546503	Peak947	UTR
2L	5546708	5547637	Peak948	promoter
2L	5550630	5551103	Peak949	promoter
2L	5658364	5658859	Peak950	promoter
2L	5724005	5724268	Peak951	intergenic
2L	5724491	5725209	Peak952	promoter
2L	5730825	5731093	Peak953	intron
2L	5739177	5739563	Peak954	intron
2L	5777541	5777980	Peak955	intron
2L	5780653	5780927	Peak956	intron
2L	5781205	5781429	Peak957	intron
2L	5783773	5784037	Peak958	promoter
2L	5789163	5789741	Peak959	intron
2L	5789821	5790072	Peak960	intron
2L	5799257	5800486	Peak961	promoter
2L	5800691	5803915	Peak962	promoter
2L	5804841	5805835	Peak963	promoter
2L	5870635	5871781	Peak964	intron
2L	5877497	5878107	Peak965	intron
2L	5879228	5879753	Peak966	promoter
2L	5879808	5880049	Peak967	intergenic
2L	5890599	5891026	Peak968	intergenic
2L	5891794	5892208	Peak969	intergenic
2L	5892509	5892717	Peak970	CDS
2L	5902938	5903289	Peak971	intergenic
2L	5906919	5907911	Peak972	promoter
2L	5943498	5944773	Peak973	promoter
2L	5955869	5956164	Peak974	CDS
2L	5961600	5961945	Peak975	intergenic
2L	5968980	5969455	Peak976	CDS
2L	5972224	5972445	Peak977	UTR
2L	5972582	5972679	Peak978	UTR
2L	5974030	5974406	Peak979	intron
2L	5974824	5975388	Peak980	intron
2L	5976519	5976866	Peak981	CDS
2L	5977073	5981270	Peak982	promoter
2L	5981423	5985086	Peak983	promoter
2L	5985321	5985519	Peak984	UTR
2L	5985785	5987320	Peak985	promoter
2L	5996966	5999771	Peak986	promoter
2L	6000160	6000510	Peak987	promoter
2L	6000646	6000848	Peak988	intergenic
2L	6000904	6001101	Peak989	CDS
2L	6004738	6005174	Peak990	CDS
2L	6019840	6020060	Peak991	intergenic
2L	6024406	6024641	Peak992	promoter
2L	6036705	6037033	Peak993	promoter
2L	6037763	6037940	Peak994	promoter
2L	6047577	6049649	Peak995	promoter
2L	6050054	6050375	Peak996	CDS
2L	6050675	6051005	Peak997	promoter
2L	6051105	6051638	Peak998	intron
2L	6051716	6052410	Peak999	CDS
2L	6062883	6063231	Peak1000	promoter
2L	6065817	6066070	Peak1001	promoter
2L	6070905	6071193	Peak1002	promoter
2L	6076179	6076426	Peak1003	intergenic
2L	6078724	6079472	Peak1004	intergenic
2L	6081305	6081543	Peak1005	intergenic
2L	6088192	6088885	Peak1006	intron
2L	6089077	6089475	Peak1007	intron
2L	6091193	6091814	Peak1008	promoter
2L	6098732	6099180	Peak1009	promoter
2L	6125086	6125399	Peak1010	promoter
2L	6156594	6157047	Peak1011	intergenic
2L	6177604	6177901	Peak1012	intergenic
2L	6178466	6179668	Peak1013	promoter
2L	6180041	6180387	Peak1014	intron
2L	6186461	6186853	Peak1015	intron
2L	6204769	6205144	Peak1016	intron
2L	6213177	6213897	Peak1017	intergenic
2L	6229191	6229815	Peak1018	intergenic
2L	6241122	6241376	Peak1019	intergenic
2L	6241950	6242408	Peak1020	intergenic
2L	6250313	6250535	Peak1021	intergenic
2L	6252393	6252634	Peak1022	intergenic
2L	6252785	6253112	Peak1023	intergenic
2L	6259510	6259976	Peak1024	intron
2L	6323559	6324631	Peak1025	promoter
2L	6337651	6337958	Peak1026	intron
2L	6338225	6339626	Peak1027	promoter
2L	6357000	6357284	Peak1028	UTR
2L	6372949	6377558	Peak1029	CDS
2L	6390369	6390737	Peak1030	intron
2L	6411047	6411646	Peak1031	promoter
2L	6424225	6424640	Peak1032	promoter
2L	6455085	6456771	Peak1033	promoter
2L	6457472	6457691	Peak1034	CDS
2L	6467572	6467857	Peak1035	promoter
2L	6473338	6474066	Peak1036	promoter
2L	6474472	6474750	Peak1037	UTR
2L	6476640	6477115	Peak1038	promoter
2L	6479257	6481736	Peak1039	promoter
2L	6488960	6489451	Peak1040	promoter
2L	6490473	6491432	Peak1041	promoter
2L	6498458	6499256	Peak1042	promoter
2L	6502974	6503293	Peak1043	intron
2L	6526958	6527294	Peak1044	UTR
2L	6532198	6532742	Peak1045	intron
2L	6535772	6536504	Peak1046	promoter
2L	6543871	6544266	Peak1047	intron
2L	6544683	6544918	Peak1048	intron
2L	6545193	6545455	Peak1049	intron
2L	6546972	6547229	Peak1050	promoter
2L	6557429	6558065	Peak1051	promoter
2L	6561416	6561711	Peak1052	promoter
2L	6562057	6562650	Peak1053	promoter
2L	6565888	6566355	Peak1054	promoter
2L	6610758	6612012	Peak1055	promoter
2L	6612295	6613346	Peak1056	CDS
2L	6632232	6632668	Peak1057	promoter
2L	6645989	6646672	Peak1058	CDS
2L	6647012	6647848	Peak1059	intron
2L	6647901	6648332	Peak1060	promoter
2L	6648386	6649691	Peak1061	promoter
2L	6667700	6668196	Peak1062	promoter
2L	6673817	6674038	Peak1063	promoter
2L	6677498	6677701	Peak1064	promoter
2L	6683425	6683668	Peak1065	intron
2L	6684233	6684480	Peak1066	promoter
2L	6684633	6685102	Peak1067	UTR
2L	6700860	6701073	Peak1068	intron
2L	6716005	6716393	Peak1069	promoter
2L	6716998	6717190	Peak1070	intergenic
2L	6717475	6717933	Peak1071	promoter
2L	6722711	6724583	Peak1072	promoter
2L	6724911	6725193	Peak1073	CDS
2L	6737721	6738121	Peak1074	CDS
2L	6738336	6738574	Peak1075	intron
2L	6792084	6792366	Peak1076	intron
2L	6793635	6794999	Peak1077	promoter
2L	6795184	6795488	Peak1078	intron
2L	6821616	6822121	Peak1079	intergenic
2L	6826319	6826691	Peak1080	intron
2L	6827720	6827919	Peak1081	intron
2L	6833591	6834079	Peak1082	intron
2L	6841133	6841485	Peak1083	intergenic
2L	6851938	6852457	Peak1084	promoter
2L	6854025	6854258	Peak1085	promoter
2L	6907414	6908382	Peak1086	promoter
2L	6912266	6912514	Peak1087	CDS
2L	6913008	6913632	Peak1088	CDS
2L	6913685	6914457	Peak1089	promoter
2L	6914910	6915353	Peak1090	CDS
2L	6915683	6916576	Peak1091	promoter
2L	6916880	6918974	Peak1092	promoter
2L	6919047	6920386	Peak1093	promoter
2L	6920521	6922779	Peak1094	promoter
2L	6923806	6924484	Peak1095	CDS
2L	6924709	6925448	Peak1096	CDS
2L	6925733	6925947	Peak1097	intron
2L	6926264	6926420	Peak1098	intron
2L	6926932	6927270	Peak1099	intron
2L	6927914	6928140	Peak1100	UTR
2L	6939613	6940146	Peak1101	CDS
2L	6944973	6945398	Peak1102	promoter
2L	6945668	6945855	Peak1103	CDS
2L	6948493	6948994	Peak1104	promoter
2L	6949687	6950240	Peak1105	promoter
2L	6956473	6957327	Peak1106	promoter
2L	6959965	6960828	Peak1107	promoter
2L	6960895	6961151	Peak1108	CDS
2L	6963636	6964978	Peak1109	promoter
2L	6965154	6965391	Peak1110	CDS
2L	6965448	6965656	Peak1111	CDS
2L	6966138	6967804	Peak1112	promoter
2L	6967922	6969823	Peak1113	UTR
2L	6969930	6972083	Peak1114	promoter
2L	6972606	6972795	Peak1115	intergenic
2L	6973265	6973932	Peak1116	CDS
2L	6975393	6975642	Peak1117	intron
2L	6988671	6989080	Peak1118	intron
2L	6990143	6990676	Peak1119	intron
2L	6991050	6991313	Peak1120	intron
2L	7001739	7002068	Peak1121	intron
2L	7002889	7003347	Peak1122	intron
2L	7003429	7004018	Peak1123	intron
2L	7005531	7005871	Peak1124	intron
2L	7006561	7007062	Peak1125	intron
2L	7009143	7009373	Peak1126	intron
2L	7009583	7011349	Peak1127	promoter
2L	7011990	7012224	Peak1128	intergenic
2L	7013200	7013854	Peak1129	promoter
2L	7023637	7024206	Peak1130	promoter
2L	7025557	7025779	Peak1131	CDS
2L	7026641	7027835	Peak1132	promoter
2L	7032120	7033634	Peak1133	promoter
2L	7035710	7036078	Peak1134	CDS
2L	7036208	7036513	Peak1135	CDS
2L	7036931	7037424	Peak1136	CDS
2L	7037678	7039446	Peak1137	promoter
2L	7040556	7040913	Peak1138	CDS
2L	7042082	7042625	Peak1139	promoter
2L	7042899	7043586	Peak1140	intron
2L	7043851	7044459	Peak1141	intron
2L	7045422	7046204	Peak1142	intron
2L	7046505	7046838	Peak1143	CDS
2L	7046977	7047300	Peak1144	CDS
2L	7048520	7050246	Peak1145	promoter
2L	7050598	7051099	Peak1146	CDS
2L	7051352	7053415	Peak1147	CDS
2L	7053487	7054763	Peak1148	CDS
2L	7055113	7055715	Peak1149	UTR
2L	7056083	7057189	Peak1150	promoter
2L	7057361	7057785	Peak1151	CDS
2L	7063851	7064483	Peak1152	promoter
2L	7065466	7066035	Peak1153	promoter
2L	7096680	7096972	Peak1154	intergenic
2L	7119675	7119972	Peak1155	intron
2L	7133846	7134397	Peak1156	promoter
2L	7138360	7138963	Peak1157	intron
2L	7148385	7148663	Peak1158	intron
2L	7157549	7157948	Peak1159	promoter
2L	7178948	7179160	Peak1160	intergenic
2L	7181990	7182341	Peak1161	promoter
2L	7194016	7194775	Peak1162	promoter
2L	7204135	7204452	Peak1163	promoter
2L	7208696	7208983	Peak1164	intron
2L	7211705	7212299	Peak1165	intron
2L	7217884	7218545	Peak1166	intron
2L	7218842	7220312	Peak1167	promoter
2L	7220751	7220966	Peak1168	CDS
2L	7222940	7223193	Peak1169	promoter
2L	7226710	7227007	Peak1170	intron
2L	7241633	7241905	Peak1171	intron
2L	7244914	7245790	Peak1172	promoter
2L	7247416	7247822	Peak1173	intron
2L	7249332	7249793	Peak1174	promoter
2L	7276972	7277642	Peak1175	promoter
2L	7289541	7291015	Peak1176	intergenic
2L	7295477	7295916	Peak1177	intergenic
2L	7296329	7296901	Peak1178	intergenic
2L	7299349	7299789	Peak1179	intergenic
2L	7300005	7300383	Peak1180	intergenic
2L	7303276	7303505	Peak1181	intergenic
2L	7304082	7305373	Peak1182	intergenic
2L	7305506	7305961	Peak1183	intergenic
2L	7306167	7306460	Peak1184	intergenic
2L	7306714	7307736	Peak1185	promoter
2L	7309880	7311292	Peak1186	intron
2L	7311530	7311804	Peak1187	intron
2L	7311990	7312483	Peak1188	intron
2L	7312883	7313088	Peak1189	CDS
2L	7315625	7315851	Peak1190	UTR
2L	7340134	7340379	Peak1191	intron
2L	7363007	7363421	Peak1192	intergenic
2L	7386464	7386786	Peak1193	CDS
2L	7387838	7388362	Peak1194	promoter
2L	7411557	7411738	Peak1195	CDS
2L	7412271	7412545	Peak1196	promoter
2L	7418363	7418819	Peak1197	intron
2L	7419659	7420267	Peak1198	intron
2L	7422424	7422644	Peak1199	UTR
2L	7426533	7426748	Peak1200	intergenic
2L	7426922	7427121	Peak1201	promoter
2L	7491331	7491665	Peak1202	intron
2L	7495220	7496615	Peak1203	promoter
2L	7496798	7497620	Peak1204	promoter
2L	7498944	7499144	Peak1205	CDS
2L	7503609	7503861	Peak1206	intron
2L	7505603	7505903	Peak1207	intron
2L	7507580	7507872	Peak1208	intron
2L	7511276	7511544	Peak1209	intron
2L	7512740	7513729	Peak1210	intron
2L	7513941	7514255	Peak1211	intron
2L	7514959	7515709	Peak1212	intron
2L	7516219	7518027	Peak1213	intron
2L	7518298	7519064	Peak1214	intron
2L	7519439	7521089	Peak1215	intron
2L	7522354	7522578	Peak1216	intron
2L	7523035	7523343	Peak1217	intron
2L	7526019	7527589	Peak1218	intron
2L	7527895	7528342	Peak1219	intron
2L	7529159	7529827	Peak1220	CDS
2L	7530173	7531068	Peak1221	promoter
2L	7532116	7533501	Peak1222	intron
2L	7533898	7534607	Peak1223	intron
2L	7534898	7535999	Peak1224	intron
2L	7536274	7536747	Peak1225	CDS
2L	7538981	7539392	Peak1226	intron
2L	7539691	7540198	Peak1227	intron
2L	7540430	7540695	Peak1228	intron
2L	7541836	7541992	Peak1229	intron
2L	7542827	7542969	Peak1230	intron
2L	7543865	7545077	Peak1231	promoter
2L	7545391	7545895	Peak1232	intron
2L	7576363	7576668	Peak1233	promoter
2L	7577131	7577354	Peak1234	intron
2L	7590993	7591229	Peak1235	intergenic
2L	7592911	7593190	Peak1236	intergenic
2L	7611232	7611560	Peak1237	intron
2L	7624451	7624648	Peak1238	intergenic
2L	7632531	7632839	Peak1239	intergenic
2L	7633011	7633357	Peak1240	intergenic
2L	7640932	7641165	Peak1241	intergenic
2L	7641342	7641783	Peak1242	intergenic
2L	7782271	7782513	Peak1243	CDS
2L	7782744	7783229	Peak1244	promoter
2L	7790326	7790750	Peak1245	promoter
2L	7799471	7800281	Peak1246	promoter
2L	7807404	7807634	Peak1247	intron
2L	7811329	7812090	Peak1248	promoter
2L	7821647	7821846	Peak1249	intron
2L	7826606	7827400	Peak1250	promoter
2L	7827572	7829280	Peak1251	promoter
2L	7832813	7833178	Peak1252	UTR
2L	7855207	7855620	Peak1253	promoter
2L	7885029	7885665	Peak1254	promoter
2L	7887036	7887334	Peak1255	UTR
2L	7887409	7887711	Peak1256	promoter
2L	7890765	7890986	Peak1257	intergenic
2L	7915026	7915336	Peak1258	intron
2L	7976736	7977011	Peak1259	intron
2L	7984050	7984486	Peak1260	promoter
2L	7991432	7991964	Peak1261	promoter
2L	7993366	7993652	Peak1262	intron
2L	7993946	7994909	Peak1263	promoter
2L	7997393	7997612	Peak1264	UTR
2L	7998674	7999217	Peak1265	promoter
2L	8001487	8001756	Peak1266	intron
2L	8028561	8028949	Peak1267	UTR
2L	8029293	8030403	Peak1268	promoter
2L	8030583	8032486	Peak1269	promoter
2L	8033578	8033825	Peak1270	intron
2L	8035107	8035359	Peak1271	intron
2L	8037990	8038288	Peak1272	CDS
2L	8038891	8039359	Peak1273	intron
2L	8041487	8041677	Peak1274	CDS
2L	8042283	8043060	Peak1275	promoter
2L	8043224	8043970	Peak1276	promoter
2L	8047305	8047502	Peak1277	CDS
2L	8071452	8071779	Peak1278	promoter
2L	8072517	8073403	Peak1279	promoter
2L	8081519	8082191	Peak1280	intron
2L	8082256	8084086	Peak1281	promoter
2L	8084466	8085177	Peak1282	intron
2L	8085507	8085857	Peak1283	intron
2L	8086744	8087246	Peak1284	intron
2L	8088058	8088685	Peak1285	promoter
2L	8091018	8091246	Peak1286	intron
2L	8093051	8093537	Peak1287	intron
2L	8100034	8100279	Peak1288	intron
2L	8104067	8104440	Peak1289	intron
2L	8106997	8107338	Peak1290	CDS
2L	8116733	8116944	Peak1291	intergenic
2L	8123863	8124197	Peak1292	promoter
2L	8125330	8125583	Peak1293	CDS
2L	8126553	8127153	Peak1294	promoter
2L	8127467	8127959	Peak1295	intron
2L	8134012	8134296	Peak1296	UTR
2L	8141634	8141924	Peak1297	intron
2L	8142616	8142890	Peak1298	intron
2L	8143856	8144437	Peak1299	promoter
2L	8145168	8145821	Peak1300	promoter
2L	8146527	8147186	Peak1301	intron
2L	8147663	8148120	Peak1302	CDS
2L	8148503	8149130	Peak1303	promoter
2L	8154209	8154645	Peak1304	CDS
2L	8154986	8155214	Peak1305	CDS
2L	8156825	8157536	Peak1306	CDS
2L	8158083	8158552	Peak1307	CDS
2L	8161863	8163929	Peak1308	promoter
2L	8165903	8166471	Peak1309	intron
2L	8166710	8166916	Peak1310	intron
2L	8167216	8168084	Peak1311	intron
2L	8185111	8185406	Peak1312	CDS
2L	8197157	8197316	Peak1313	promoter
2L	8208872	8211462	Peak1314	promoter
2L	8212684	8213277	Peak1315	promoter
2L	8213809	8214415	Peak1316	promoter
2L	8214767	8215191	Peak1317	CDS
2L	8239781	8239966	Peak1318	promoter
2L	8240047	8240256	Peak1319	intergenic
2L	8254379	8254595	Peak1320	intron
2L	8257148	8257761	Peak1321	promoter
2L	8257897	8258196	Peak1322	intergenic
2L	8266773	8267118	Peak1323	intron
2L	8274590	8275115	Peak1324	intron
2L	8275782	8276734	Peak1325	intron
2L	8277511	8278591	Peak1326	promoter
2L	8279599	8279776	Peak1327	intron
2L	8280109	8280584	Peak1328	intron
2L	8287331	8287901	Peak1329	intron
2L	8288149	8288412	Peak1330	intron
2L	8289804	8290297	Peak1331	intron
2L	8290559	8290879	Peak1332	intron
2L	8297040	8297602	Peak1333	promoter
2L	8300400	8301214	Peak1334	promoter
2L	8301485	8301906	Peak1335	CDS
2L	8302114	8302304	Peak1336	CDS
2L	8302504	8303111	Peak1337	promoter
2L	8304745	8305138	Peak1338	CDS
2L	8305687	8305883	Peak1339	CDS
2L	8308077	8308287	Peak1340	promoter
2L	8311389	8311992	Peak1341	promoter
2L	8361413	8361636	Peak1342	intron
2L	8362609	8362977	Peak1343	intergenic
2L	8363979	8365000	Peak1344	promoter
2L	8365127	8365816	Peak1345	CDS
2L	8365944	8366677	Peak1346	promoter
2L	8374350	8374803	Peak1347	promoter
2L	8381545	8381876	Peak1348	promoter
2L	8381985	8383289	Peak1349	promoter
2L	8383693	8384271	Peak1350	promoter
2L	8384351	8385168	Peak1351	promoter
2L	8385827	8386465	Peak1352	promoter
2L	8386561	8387524	Peak1353	CDS
2L	8387648	8387878	Peak1354	CDS
2L	8402226	8402342	Peak1355	CDS
2L	8402531	8403215	Peak1356	promoter
2L	8403339	8404116	Peak1357	promoter
2L	8414648	8415266	Peak1358	promoter
2L	8415548	8417258	Peak1359	promoter
2L	8417608	8417882	Peak1360	intron
2L	8418042	8418603	Peak1361	intron
2L	8419234	8420408	Peak1362	promoter
2L	8421014	8421581	Peak1363	intron
2L	8422191	8422545	Peak1364	intron
2L	8423004	8423289	Peak1365	intron
2L	8423455	8423832	Peak1366	intron
2L	8424714	8425334	Peak1367	intron
2L	8436196	8436517	Peak1368	CDS
2L	8436987	8437972	Peak1369	promoter
2L	8463374	8463847	Peak1370	intron
2L	8464362	8464621	Peak1371	promoter
2L	8466634	8467174	Peak1372	promoter
2L	8478078	8479775	Peak1373	promoter
2L	8481649	8482328	Peak1374	intron
2L	8485561	8486070	Peak1375	intron
2L	8488848	8489055	Peak1376	promoter
2L	8509764	8510179	Peak1377	CDS
2L	8510331	8511320	Peak1378	CDS
2L	8511435	8512133	Peak1379	promoter
2L	8514763	8515433	Peak1380	promoter
2L	8517231	8517837	Peak1381	promoter
2L	8521277	8522951	Peak1382	promoter
2L	8528121	8528798	Peak1383	promoter
2L	8529526	8529850	Peak1384	intron
2L	8541006	8541267	Peak1385	CDS
2L	8541473	8542529	Peak1386	promoter
2L	8543161	8543458	Peak1387	promoter
2L	8543825	8544367	Peak1388	intron
2L	8544598	8545000	Peak1389	UTR
2L	8545406	8545921	Peak1390	intron
2L	8578526	8578835	Peak1391	intron
2L	8587917	8588232	Peak1392	intron
2L	8675520	8675923	Peak1393	CDS
2L	8679034	8679233	Peak1394	intron
2L	8683199	8683606	Peak1395	CDS
2L	8683659	8684162	Peak1396	CDS
2L	8685261	8686359	Peak1397	promoter
2L	8740023	8740426	Peak1398	intron
2L	8740512	8741280	Peak1399	promoter
2L	8789192	8789565	Peak1400	intergenic
2L	8808010	8808300	Peak1401	intergenic
2L	8809575	8810507	Peak1402	intergenic
2L	8811203	8811827	Peak1403	intergenic
2L	8818175	8818360	Peak1404	intergenic
2L	8822208	8822594	Peak1405	intergenic
2L	8824756	8824928	Peak1406	intergenic
2L	8825069	8826088	Peak1407	promoter
2L	8826441	8828848	Peak1408	CDS
2L	8831967	8833292	Peak1409	intergenic
2L	8838438	8838626	Peak1410	intergenic
2L	8838929	8839197	Peak1411	intergenic
2L	8841278	8842720	Peak1412	intergenic
2L	8843591	8844025	Peak1413	intergenic
2L	8844709	8844926	Peak1414	intergenic
2L	8845793	8846441	Peak1415	intergenic
2L	8846592	8847585	Peak1416	intergenic
2L	8849092	8849957	Peak1417	intergenic
2L	8851943	8852486	Peak1418	intergenic
2L	8865882	8866301	Peak1419	CDS
2L	8870161	8870401	Peak1420	intergenic
2L	8871453	8871833	Peak1421	intergenic
2L	8872245	8872889	Peak1422	intergenic
2L	8875685	8876395	Peak1423	intergenic
2L	8888679	8888907	Peak1424	intergenic
2L	8936550	8936785	Peak1425	intergenic
2L	8943183	8943427	Peak1426	promoter
2L	8949853	8950309	Peak1427	intron
2L	8950583	8950823	Peak1428	intron
2L	8957997	8958252	Peak1429	promoter
2L	8984627	8985119	Peak1430	promoter
2L	8997299	8997700	Peak1431	promoter
2L	9019433	9019719	Peak1432	intergenic
2L	9120994	9121333	Peak1433	intergenic
2L	9124462	9124723	Peak1434	intergenic
2L	9125537	9125902	Peak1435	promoter
2L	9126080	9126436	Peak1436	intron
2L	9126980	9127274	Peak1437	CDS
2L	9128230	9129171	Peak1438	intron
2L	9129394	9129864	Peak1439	intron
2L	9137973	9138576	Peak1440	intron
2L	9141532	9141884	Peak1441	intron
2L	9144808	9145342	Peak1442	intron
2L	9145596	9147033	Peak1443	intron
2L	9147387	9147581	Peak1444	intron
2L	9148893	9149345	Peak1445	intron
2L	9149679	9150529	Peak1446	intron
2L	9150799	9151340	Peak1447	promoter
2L	9158427	9158672	Peak1448	intron
2L	9166362	9166901	Peak1449	promoter
2L	9166963	9167237	Peak1450	UTR
2L	9176118	9176689	Peak1451	promoter
2L	9179286	9179648	Peak1452	intron
2L	9186669	9186909	Peak1453	intron
2L	9226313	9226645	Peak1454	intron
2L	9233956	9234275	Peak1455	CDS
2L	9236460	9236755	Peak1456	intron
2L	9252028	9252459	Peak1457	CDS
2L	9252598	9253248	Peak1458	promoter
2L	9256489	9256671	Peak1459	promoter
2L	9330578	9331211	Peak1460	promoter
2L	9331271	9331567	Peak1461	UTR
2L	9416158	9416662	Peak1462	promoter
2L	9420676	9420934	Peak1463	CDS
2L	9421289	9421806	Peak1464	intron
2L	9430936	9431174	Peak1465	promoter
2L	9431301	9432027	Peak1466	promoter
2L	9432722	9433082	Peak1467	CDS
2L	9437223	9437649	Peak1468	promoter
2L	9448092	9450239	Peak1469	promoter
2L	9452952	9453429	Peak1470	intron
2L	9454105	9454934	Peak1471	intron
2L	9455119	9455526	Peak1472	intron
2L	9458884	9459083	Peak1473	intron
2L	9460071	9460780	Peak1474	CDS
2L	9460992	9461453	Peak1475	CDS
2L	9461985	9462246	Peak1476	CDS
2L	9464481	9464885	Peak1477	intergenic
2L	9493796	9494983	Peak1478	promoter
2L	9495287	9495826	Peak1479	promoter
2L	9495911	9496151	Peak1480	intron
2L	9496332	9496752	Peak1481	intron
2L	9497238	9497478	Peak1482	intron
2L	9508706	9509019	Peak1483	intron
2L	9521085	9521818	Peak1484	promoter
2L	9522827	9523136	Peak1485	intron
2L	9567623	9567937	Peak1486	intergenic
2L	9568070	9569146	Peak1487	promoter
2L	9569215	9569407	Peak1488	intron
2L	9569696	9570034	Peak1489	intron
2L	9570158	9570691	Peak1490	promoter
2L	9576230	9576514	Peak1491	intron
2L	9576597	9576934	Peak1492	promoter
2L	9577158	9577458	Peak1493	intergenic
2L	9581472	9582074	Peak1494	promoter
2L	9582892	9583308	Peak1495	intergenic
2L	9583378	9583665	Peak1496	intergenic
2L	9584328	9584643	Peak1497	intergenic
2L	9585158	9585506	Peak1498	intergenic
2L	9587164	9587477	Peak1499	intergenic
2L	9601243	9601650	Peak1500	intergenic
2L	9601986	9602487	Peak1501	intergenic
2L	9608103	9608689	Peak1502	promoter
2L	9613183	9613933	Peak1503	promoter
2L	9616683	9617085	Peak1504	promoter
2L	9686083	9686426	Peak1505	intron
2L	9698456	9699511	Peak1506	promoter
2L	9699618	9701046	Peak1507	promoter
2L	9705129	9706194	Peak1508	promoter
2L	9710859	9711364	Peak1509	promoter
2L	9715079	9715801	Peak1510	UTR
2L	9731204	9731694	Peak1511	intron
2L	9757947	9759243	Peak1512	promoter
2L	9763418	9763845	Peak1513	promoter
2L	9782256	9782475	Peak1514	promoter
2L	9790535	9791073	Peak1515	promoter
2L	9792990	9793265	Peak1516	promoter
2L	9887881	9888438	Peak1517	promoter
2L	9890671	9891253	Peak1518	promoter
2L	9892886	9893570	Peak1519	promoter
2L	9894331	9896082	Peak1520	promoter
2L	9896297	9897112	Peak1521	CDS
2L	9897180	9897643	Peak1522	promoter
2L	9897974	9898402	Peak1523	CDS
2L	9907230	9907683	Peak1524	UTR
2L	9911915	9913075	Peak1525	promoter
2L	9918018	9918348	Peak1526	promoter
2L	9937931	9938515	Peak1527	promoter
2L	9938637	9939114	Peak1528	promoter
2L	9946052	9946278	Peak1529	intron
2L	9954044	9954309	Peak1530	promoter
2L	9956752	9957027	Peak1531	promoter
2L	9957128	9957391	Peak1532	promoter
2L	9963556	9963842	Peak1533	promoter
2L	9966769	9967902	Peak1534	promoter
2L	9968155	9968600	Peak1535	CDS
2L	9969256	9970000	Peak1536	intergenic
2L	9970438	9970745	Peak1537	intergenic
2L	9982842	9983696	Peak1538	UTR
2L	9983835	9985203	Peak1539	promoter
2L	9985880	9986157	Peak1540	intron
2L	9986578	9987103	Peak1541	CDS
2L	9987373	9990791	Peak1542	CDS
2L	9990899	9995075	Peak1543	CDS
2L	9995268	9995459	Peak1544	UTR
2L	9995866	9996688	Peak1545	promoter
2L	9996839	9997321	Peak1546	CDS
2L	10002412	10002619	Peak1547	intron
2L	10003654	10004966	Peak1548	promoter
2L	10008509	10008717	Peak1549	UTR
2L	10009289	10009640	Peak1550	promoter
2L	10009904	10010199	Peak1551	intron
2L	10056562	10057447	Peak1552	promoter
2L	10057652	10059828	Peak1553	CDS
2L	10180163	10180659	Peak1554	promoter
2L	10199021	10199209	Peak1555	promoter
2L	10199810	10200544	Peak1556	CDS
2L	10200845	10201586	Peak1557	promoter
2L	10203982	10204413	Peak1558	promoter
2L	10206666	10207052	Peak1559	promoter
2L	10208914	10209238	Peak1560	intron
2L	10215085	10215377	Peak1561	CDS
2L	10217364	10217732	Peak1562	CDS
2L	10220041	10221088	Peak1563	promoter
2L	10221151	10222470	Peak1564	promoter
2L	10224994	10225465	Peak1565	CDS
2L	10226188	10226980	Peak1566	promoter
2L	10230401	10231204	Peak1567	intron
2L	10231302	10231784	Peak1568	promoter
2L	10232398	10232644	Peak1569	promoter
2L	10235968	10236308	Peak1570	CDS
2L	10238004	10238241	Peak1571	UTR
2L	10239210	10239540	Peak1572	promoter
2L	10239844	10240099	Peak1573	promoter
2L	10242645	10243075	Peak1574	CDS
2L	10246386	10247246	Peak1575	promoter
2L	10249631	10250216	Peak1576	promoter
2L	10250386	10250622	Peak1577	promoter
2L	10250691	10250916	Peak1578	promoter
2L	10255758	10256046	Peak1579	promoter
2L	10258634	10258926	Peak1580	CDS
2L	10259916	10260355	Peak1581	promoter
2L	10260546	10261221	Peak1582	promoter
2L	10262833	10263742	Peak1583	promoter
2L	10264050	10264460	Peak1584	promoter
2L	10265214	10265447	Peak1585	promoter
2L	10269855	10270173	Peak1586	promoter
2L	10276642	10277260	Peak1587	promoter
2L	10277437	10277759	Peak1588	promoter
2L	10292226	10292504	Peak1589	promoter
2L	10295326	10295716	Peak1590	promoter
2L	10298291	10298702	Peak1591	intron
2L	10299306	10299520	Peak1592	intron
2L	10306785	10307036	Peak1593	promoter
2L	10312014	10312225	Peak1594	promoter
2L	10314271	10314530	Peak1595	promoter
2L	10315639	10315913	Peak1596	CDS
2L	10332704	10333001	Peak1597	CDS
2L	10333520	10333970	Peak1598	promoter
2L	10334368	10335385	Peak1599	CDS
2L	10339269	10339858	Peak1600	promoter
2L	10341474	10341913	Peak1601	promoter
2L	10342555	10343099	Peak1602	promoter
2L	10344032	10344557	Peak1603	promoter
2L	10353744	10354262	Peak1604	promoter
2L	10356607	10357196	Peak1605	promoter
2L	10362577	10362785	Peak1606	promoter
2L	10364287	10364954	Peak1607	promoter
2L	10365439	10365640	Peak1608	CDS
2L	10366543	10367635	Peak1609	promoter
2L	10375437	10375916	Peak1610	promoter
2L	10376156	10376896	Peak1611	promoter
2L	10377000	10377256	Peak1612	intron
2L	10379944	10380288	Peak1613	promoter
2L	10380435	10380607	Peak1614	CDS
2L	10384950	10385193	Peak1615	CDS
2L	10385276	10385561	Peak1616	CDS
2L	10385709	10386382	Peak1617	promoter
2L	10386494	10386995	Peak1618	promoter
2L	10387129	10387550	Peak1619	CDS
2L	10387911	10388959	Peak1620	promoter
2L	10390116	10390446	Peak1621	CDS
2L	10391232	10391609	Peak1622	CDS
2L	10391698	10392228	Peak1623	CDS
2L	10396094	10396366	Peak1624	promoter
2L	10396620	10397728	Peak1625	promoter
2L	10397990	10398722	Peak1626	promoter
2L	10401996	10402309	Peak1627	CDS
2L	10403027	10403633	Peak1628	CDS
2L	10403920	10404193	Peak1629	promoter
2L	10408173	10408488	Peak1630	promoter
2L	10408685	10408889	Peak1631	CDS
2L	10408945	10409602	Peak1632	CDS
2L	10409687	10410389	Peak1633	CDS
2L	10410623	10411035	Peak1634	CDS
2L	10411098	10411359	Peak1635	CDS
2L	10413300	10413583	Peak1636	promoter
2L	10413727	10414332	Peak1637	promoter
2L	10419041	10419264	Peak1638	promoter
2L	10419432	10419659	Peak1639	CDS
2L	10422651	10422950	Peak1640	promoter
2L	10423193	10423410	Peak1641	promoter
2L	10423759	10423951	Peak1642	CDS
2L	10426484	10426683	Peak1643	promoter
2L	10426816	10427322	Peak1644	promoter
2L	10430565	10431070	Peak1645	promoter
2L	10431267	10431495	Peak1646	promoter
2L	10439268	10439522	Peak1647	promoter
2L	10440079	10440343	Peak1648	CDS
2L	10457177	10458154	Peak1649	promoter
2L	10483070	10483804	Peak1650	promoter
2L	10486605	10486935	Peak1651	CDS
2L	10488473	10488718	Peak1652	promoter
2L	10505971	10506267	Peak1653	intron
2L	10506583	10507316	Peak1654	promoter
2L	10517229	10517429	Peak1655	promoter
2L	10544724	10544987	Peak1656	promoter
2L	10547241	10547783	Peak1657	intron
2L	10548104	10548484	Peak1658	intron
2L	10548660	10549443	Peak1659	intron
2L	10569728	10569927	Peak1660	intron
2L	10608525	10609316	Peak1661	intron
2L	10609774	10610002	Peak1662	intron
2L	10610326	10610582	Peak1663	intron
2L	10611421	10611860	Peak1664	intron
2L	10647642	10648127	Peak1665	CDS
2L	10654629	10654873	Peak1666	intergenic
2L	10661950	10662174	Peak1667	promoter
2L	10663686	10663987	Peak1668	intron
2L	10728856	10729093	Peak1669	promoter
2L	10732614	10733129	Peak1670	promoter
2L	10735925	10736196	Peak1671	promoter
2L	10737207	10737567	Peak1672	promoter
2L	10743749	10744026	Peak1673	promoter
2L	10756213	10756466	Peak1674	promoter
2L	10767544	10768151	Peak1675	promoter
2L	10769873	10770093	Peak1676	promoter
2L	10839684	10840631	Peak1677	CDS
2L	10840765	10841291	Peak1678	CDS
2L	10841809	10842776	Peak1679	promoter
2L	10849502	10849703	Peak1680	intron
2L	10850240	10850554	Peak1681	promoter
2L	10850642	10851019	Peak1682	promoter
2L	10858791	10859138	Peak1683	intron
2L	10967274	10968283	Peak1684	promoter
2L	10974947	10975254	Peak1685	CDS
2L	10976259	10976493	Peak1686	promoter
2L	10976690	10976906	Peak1687	promoter
2L	10977073	10977316	Peak1688	intron
2L	10989206	10989534	Peak1689	promoter
2L	10990435	10990640	Peak1690	CDS
2L	11004025	11004331	Peak1691	promoter
2L	11004695	11005182	Peak1692	promoter
2L	11010602	11011169	Peak1693	promoter
2L	11014100	11014476	Peak1694	CDS
2L	11038335	11038581	Peak1695	intron
2L	11059452	11059684	Peak1696	intron
2L	11061001	11061513	Peak1697	intron
2L	11065637	11065992	Peak1698	intron
2L	11068874	11069195	Peak1699	intergenic
2L	11070818	11071471	Peak1700	promoter
2L	11071590	11072304	Peak1701	intergenic
2L	11074264	11074519	Peak1702	intergenic
2L	11074873	11075815	Peak1703	promoter
2L	11082071	11082388	Peak1704	intergenic
2L	11100752	11100997	Peak1705	promoter
2L	11106510	11106800	Peak1706	promoter
2L	11119954	11120428	Peak1707	promoter
2L	11123692	11123902	Peak1708	promoter
2L	11130558	11131073	Peak1709	promoter
2L	11149137	11149333	Peak1710	intergenic
2L	11175493	11175811	Peak1711	intron
2L	11178923	11179124	Peak1712	promoter
2L	11184516	11184837	Peak1713	intron
2L	11185849	11186240	Peak1714	intron
2L	11189012	11189265	Peak1715	intron
2L	11190777	11191027	Peak1716	intron
2L	11193943	11194145	Peak1717	intron
2L	11194388	11194869	Peak1718	intron
2L	11206885	11207237	Peak1719	intergenic
2L	11210441	11210776	Peak1720	promoter
2L	11214544	11214879	Peak1721	intron
2L	11221439	11221648	Peak1722	intron
2L	11224498	11224769	Peak1723	intron
2L	11225316	11225679	Peak1724	intron
2L	11236518	11236734	Peak1725	CDS
2L	11243632	11243999	Peak1726	intron
2L	11268701	11269272	Peak1727	promoter
2L	11277872	11278417	Peak1728	promoter
2L	11280193	11280599	Peak1729	promoter
2L	11343846	11344347	Peak1730	intergenic
2L	11358278	11359051	Peak1731	promoter
2L	11400726	11401040	Peak1732	intergenic
2L	11405465	11405665	Peak1733	intergenic
2L	11418734	11419217	Peak1734	intergenic
2L	11432984	11433829	Peak1735	intergenic
2L	11436785	11437026	Peak1736	CDS
2L	11440067	11440273	Peak1737	CDS
2L	11440637	11441157	Peak1738	intron
2L	11445345	11446487	Peak1739	promoter
2L	11447087	11448195	Peak1740	intergenic
2L	11452535	11453512	Peak1741	intergenic
2L	11455139	11456240	Peak1742	intergenic
2L	11469803	11470076	Peak1743	intergenic
2L	11470157	11470417	Peak1744	intergenic
2L	11473942	11474288	Peak1745	intergenic
2L	11475024	11475272	Peak1746	intergenic
2L	11475502	11475824	Peak1747	intergenic
2L	11482439	11482927	Peak1748	intergenic
2L	11485475	11485721	Peak1749	CDS
2L	11485852	11487641	Peak1750	promoter
2L	11490581	11490899	Peak1751	intergenic
2L	11491005	11491546	Peak1752	intergenic
2L	11516550	11517400	Peak1753	promoter
2L	11581159	11581410	Peak1754	intergenic
2L	11581674	11582375	Peak1755	promoter
2L	11756759	11756984	Peak1756	intergenic
2L	11793539	11794359	Peak1757	promoter
2L	11794593	11795061	Peak1758	UTR
2L	11796866	11797080	Peak1759	UTR
2L	11800718	11800913	Peak1760	intron
2L	11806313	11807264	Peak1761	intron
2L	11807424	11807794	Peak1762	intron
2L	11807938	11808291	Peak1763	intron
2L	11808677	11809564	Peak1764	promoter
2L	11813402	11813902	Peak1765	promoter
2L	11829270	11829579	Peak1766	promoter
2L	11960660	11960866	Peak1767	intergenic
2L	11965487	11965845	Peak1768	intergenic
2L	11967738	11968432	Peak1769	intergenic
2L	11968840	11969298	Peak1770	intergenic
2L	11970307	11970590	Peak1771	intergenic
2L	11970706	11971528	Peak1772	intergenic
2L	11972410	11972690	Peak1773	intergenic
2L	11973225	11973640	Peak1774	intergenic
2L	11977787	11978047	Peak1775	intergenic
2L	11987547	11988137	Peak1776	promoter
2L	11989554	11990072	Peak1777	promoter
2L	11990785	11990996	Peak1778	promoter
2L	12001778	12002379	Peak1779	promoter
2L	12002926	12004501	Peak1780	intergenic
2L	12006428	12006711	Peak1781	intergenic
2L	12006832	12007941	Peak1782	intergenic
2L	12009902	12012741	Peak1783	intergenic
2L	12026461	12026728	Peak1784	intergenic
2L	12027407	12027611	Peak1785	promoter
2L	12038366	12038631	Peak1786	promoter
2L	12040598	12040811	Peak1787	promoter
2L	12043993	12044218	Peak1788	intron
2L	12048693	12049039	Peak1789	promoter
2L	12055806	12056115	Peak1790	promoter
2L	12056193	12056944	Peak1791	promoter
2L	12062741	12063335	Peak1792	promoter
2L	12065955	12066205	Peak1793	intron
2L	12075946	12076280	Peak1794	promoter
2L	12079600	12080545	Peak1795	intergenic
2L	12080874	12081817	Peak1796	intergenic
2L	12082365	12086201	Peak1797	promoter
2L	12087092	12087978	Peak1798	intergenic
2L	12088412	12088799	Peak1799	intergenic
2L	12089045	12089860	Peak1800	intergenic
2L	12091794	12092352	Peak1801	promoter
2L	12092462	12093291	Peak1802	intron
2L	12093622	12094292	Peak1803	promoter
2L	12095261	12095513	Peak1804	CDS
2L	12095620	12096841	Peak1805	promoter
2L	12097692	12097937	Peak1806	promoter
2L	12103118	12103455	Peak1807	promoter
2L	12103561	12103846	Peak1808	promoter
2L	12104095	12104391	Peak1809	promoter
2L	12108773	12109233	Peak1810	promoter
2L	12172899	12173205	Peak1811	promoter
2L	12288679	12288891	Peak1812	intron
2L	12366053	12366538	Peak1813	promoter
2L	12421801	12422170	Peak1814	promoter
2L	12424617	12424931	Peak1815	promoter
2L	12427345	12427790	Peak1816	promoter
2L	12428140	12428399	Peak1817	CDS
2L	12430367	12430586	Peak1818	CDS
2L	12431135	12431611	Peak1819	UTR
2L	12432325	12433242	Peak1820	CDS
2L	12433313	12434203	Peak1821	promoter
2L	12434316	12436034	Peak1822	promoter
2L	12436259	12436693	Peak1823	promoter
2L	12454708	12454905	Peak1824	intergenic
2L	12455147	12455402	Peak1825	intergenic
2L	12455731	12456171	Peak1826	UTR
2L	12457140	12459085	Peak1827	CDS
2L	12459303	12460900	Peak1828	CDS
2L	12461081	12461914	Peak1829	promoter
2L	12466487	12467004	Peak1830	intron
2L	12469206	12469537	Peak1831	intron
2L	12473059	12473904	Peak1832	intron
2L	12478390	12478918	Peak1833	intron
2L	12480962	12481359	Peak1834	intron
2L	12482427	12483322	Peak1835	CDS
2L	12484304	12484624	Peak1836	intron
2L	12489493	12489730	Peak1837	intron
2L	12501670	12501987	Peak1838	intron
2L	12504990	12505278	Peak1839	intron
2L	12507502	12508386	Peak1840	intron
2L	12509830	12510457	Peak1841	intron
2L	12511840	12512019	Peak1842	intron
2L	12512686	12512843	Peak1843	intron
2L	12516264	12516754	Peak1844	CDS
2L	12520231	12520742	Peak1845	intron
2L	12520993	12521393	Peak1846	intron
2L	12521663	12521905	Peak1847	intron
2L	12524149	12524311	Peak1848	intron
2L	12527680	12527880	Peak1849	intron
2L	12529456	12530123	Peak1850	intron
2L	12536318	12536544	Peak1851	CDS
2L	12539226	12539606	Peak1852	CDS
2L	12539816	12540653	Peak1853	intron
2L	12542959	12543699	Peak1854	intron
2L	12543835	12544308	Peak1855	intron
2L	12544463	12544786	Peak1856	intron
2L	12545256	12545570	Peak1857	intron
2L	12545655	12545885	Peak1858	intron
2L	12546024	12546872	Peak1859	promoter
2L	12593667	12594653	Peak1860	CDS
2L	12602523	12602727	Peak1861	intron
2L	12607309	12607791	Peak1862	intron
2L	12611786	12612193	Peak1863	intron
2L	12614770	12615135	Peak1864	intron
2L	12615966	12616401	Peak1865	intron
2L	12616487	12617119	Peak1866	intron
2L	12618058	12619124	Peak1867	promoter
2L	12621503	12621814	Peak1868	intron
2L	12622024	12622320	Peak1869	intron
2L	12622606	12622896	Peak1870	intron
2L	12623045	12623476	Peak1871	intron
2L	12625074	12625339	Peak1872	intron
2L	12632656	12633338	Peak1873	intron
2L	12660317	12660767	Peak1874	CDS
2L	12662565	12663220	Peak1875	intron
2L	12665939	12666762	Peak1876	intron
2L	12670376	12670742	Peak1877	intron
2L	12678047	12678819	Peak1878	promoter
2L	12679183	12679958	Peak1879	intron
2L	12680457	12681266	Peak1880	intron
2L	12682774	12683108	Peak1881	intron
2L	12692734	12693140	Peak1882	promoter
2L	12694868	12695071	Peak1883	promoter
2L	12704312	12705175	Peak1884	promoter
2L	12712156	12712588	Peak1885	promoter
2L	12721205	12721595	Peak1886	CDS
2L	12721719	12722038	Peak1887	promoter
2L	12722108	12722625	Peak1888	promoter
2L	12724063	12724298	Peak1889	intron
2L	12730612	12731064	Peak1890	CDS
2L	12822688	12823090	Peak1891	promoter
2L	12854568	12854957	Peak1892	intergenic
2L	12893974	12894255	Peak1893	intergenic
2L	13000514	13000714	Peak1894	promoter
2L	13004000	13004273	Peak1895	promoter
2L	13018748	13019320	Peak1896	promoter
2L	13021195	13021400	Peak1897	promoter
2L	13165320	13166671	Peak1898	promoter
2L	13166738	13167153	Peak1899	CDS
2L	13176211	13177492	Peak1900	promoter
2L	13179264	13179776	Peak1901	CDS
2L	13182408	13182759	Peak1902	promoter
2L	13191154	13192844	Peak1903	promoter
2L	13198377	13198644	Peak1904	CDS
2L	13203113	13203423	Peak1905	promoter
2L	13203594	13204150	Peak1906	promoter
2L	13205186	13205532	Peak1907	intron
2L	13211360	13212321	Peak1908	promoter
2L	13214196	13214625	Peak1909	CDS
2L	13215640	13216423	Peak1910	UTR
2L	13219346	13220304	Peak1911	promoter
2L	13221530	13222691	Peak1912	promoter
2L	13222949	13223181	Peak1913	CDS
2L	13223315	13223369	Peak1914	intergenic
2L	13223425	13223774	Peak1915	CDS
2L	13223955	13224382	Peak1916	CDS
2L	13224542	13225990	Peak1917	promoter
2L	13226744	13228235	Peak1918	promoter
2L	13229263	13230423	Peak1919	promoter
2L	13233931	13235479	Peak1920	promoter
2L	13240371	13240659	Peak1921	CDS
2L	13244353	13245358	Peak1922	intergenic
2L	13247221	13247499	Peak1923	intron
2L	13266621	13267005	Peak1924	promoter
2L	13296179	13296457	Peak1925	promoter
2L	13296746	13297044	Peak1926	intron
2L	13365856	13366635	Peak1927	promoter
2L	13369069	13369690	Peak1928	promoter
2L	13370865	13371120	Peak1929	promoter
2L	13373710	13373914	Peak1930	promoter
2L	13374042	13374630	Peak1931	promoter
2L	13378436	13378664	Peak1932	promoter
2L	13378776	13379060	Peak1933	promoter
2L	13387153	13387452	Peak1934	promoter
2L	13395027	13395294	Peak1935	promoter
2L	13398864	13399086	Peak1936	promoter
2L	13445519	13445774	Peak1937	promoter
2L	13512681	13513832	Peak1938	CDS
2L	13514226	13514645	Peak1939	intron
2L	13515384	13515700	Peak1940	intron
2L	13516332	13516561	Peak1941	intron
2L	13517295	13517515	Peak1942	intron
2L	13527846	13528112	Peak1943	CDS
2L	13546754	13547203	Peak1944	intron
2L	13547644	13548258	Peak1945	promoter
2L	13548384	13549769	Peak1946	promoter
2L	13549894	13550992	Peak1947	promoter
2L	13552773	13553027	Peak1948	intron
2L	13553603	13553826	Peak1949	intron
2L	13554761	13555104	Peak1950	intron
2L	13582678	13582948	Peak1951	intron
2L	13583335	13583536	Peak1952	intron
2L	13591355	13591762	Peak1953	intron
2L	13597245	13598012	Peak1954	intron
2L	13608840	13609203	Peak1955	intron
2L	13622880	13623173	Peak1956	intron
2L	13633417	13633638	Peak1957	CDS
2L	13640354	13640766	Peak1958	CDS
2L	13641013	13641297	Peak1959	promoter
2L	13665834	13666379	Peak1960	CDS
2L	13770971	13771225	Peak1961	promoter
2L	13772817	13773093	Peak1962	CDS
2L	13780524	13780843	Peak1963	promoter
2L	13783966	13784399	Peak1964	promoter
2L	13790006	13790377	Peak1965	CDS
2L	13793435	13793852	Peak1966	promoter
2L	13811426	13811639	Peak1967	promoter
2L	13813682	13814249	Peak1968	promoter
2L	13829391	13829940	Peak1969	promoter
2L	13830054	13830288	Peak1970	CDS
2L	13833239	13833545	Peak1971	promoter
2L	13834763	13835700	Peak1972	promoter
2L	13837596	13837984	Peak1973	intron
2L	13850637	13850893	Peak1974	intron
2L	13851028	13851693	Peak1975	intron
2L	13863480	13863844	Peak1976	intron
2L	13863916	13864075	Peak1977	intron
2L	13865609	13866004	Peak1978	intron
2L	13867589	13868151	Peak1979	intron
2L	13869358	13869886	Peak1980	intron
2L	13878030	13878405	Peak1981	intron
2L	13878679	13879135	Peak1982	promoter
2L	13884988	13885609	Peak1983	intron
2L	13885892	13886188	Peak1984	intron
2L	13887032	13887344	Peak1985	intron
2L	13887932	13888369	Peak1986	intron
2L	13903515	13904832	Peak1987	promoter
2L	13905055	13905409	Peak1988	intergenic
2L	13905485	13905779	Peak1989	promoter
2L	13923289	13923901	Peak1990	promoter
2L	13977131	13977413	Peak1991	promoter
2L	14001188	14001420	Peak1992	promoter
2L	14013577	14013862	Peak1993	promoter
2L	14020653	14021002	Peak1994	intergenic
2L	14021612	14021985	Peak1995	intergenic
2L	14023846	14024168	Peak1996	intergenic
2L	14024372	14024730	Peak1997	intergenic
2L	14025729	14026095	Peak1998	intergenic
2L	14026584	14027286	Peak1999	promoter
[truncated: 15,346 more rows]

## Sheet: README
List of 17 345 high-confidence ATAC-seq peaks.
chr	Genomic coordinates: chromosome name
start	Genomic coordinates: start position
end	Genomic coordinates: end position
ID	Peak ID
annotation	Genomic annotation (as in Fig. 4A)
