# Supplementary material for: ATAC-seq reveals regional differences in enhancer accessibility during the establishment of spatial coordinates in the Drosophila blastoderm
Source: HighWire-hosted journal article supplement (doi:10.1101/gr.242362.118), 2019-04-08
Supplement: Supplemental_Table_S5.xlsx [file Supplemental_Table_S5.xlsx]

## Sheet: Data
chr	start	end	ID	annotation
2L	5124	5369	Peak1	intergenic
2L	5521	5803	Peak2	intergenic
2L	6558	6907	Peak3	intergenic
2L	7421	9508	Peak4	promoter
2L	11743	13050	Peak5	exon
2L	13465	15680	Peak6	exon
2L	16946	17221	Peak7	intron
2L	17446	17675	Peak8	intron
2L	18216	19355	Peak9	promoter
2L	19804	20003	Peak10	intron
2L	20308	20794	Peak11	intron
2L	21316	21532	Peak12	promoter
2L	21627	23635	Peak13	exon
2L	23759	24036	Peak14	exon
2L	26145	29165	Peak15	exon
2L	30286	31244	Peak16	exon
2L	32553	33018	Peak17	exon
2L	33622	34436	Peak18	exon
2L	34726	35290	Peak19	exon
2L	35470	36707	Peak20	exon
2L	37421	37887	Peak21	exon
2L	38060	38458	Peak22	exon
2L	39540	39813	Peak23	exon
2L	43158	43669	Peak24	intron
2L	43980	44508	Peak25	intron
2L	45342	45598	Peak26	intron
2L	53644	53972	Peak27	intron
2L	54977	55452	Peak28	intron
2L	57993	58257	Peak29	UTR
2L	63798	64039	Peak30	intron
2L	64228	64532	Peak31	intron
2L	65658	66023	Peak32	intergenic
2L	66275	67693	Peak33	promoter
2L	67855	68079	Peak34	exon
2L	69329	69643	Peak35	exon
2L	69988	70192	Peak36	exon
2L	72293	72498	Peak37	promoter
2L	75174	75483	Peak38	exon
2L	76815	77091	Peak39	exon
2L	77178	77500	Peak40	exon
2L	77778	78244	Peak41	UTR
2L	78837	79302	Peak42	intergenic
2L	79721	80018	Peak43	intergenic
2L	80606	80840	Peak44	intergenic
2L	81126	81410	Peak45	intergenic
2L	81824	82588	Peak46	UTR
2L	83211	84414	Peak47	exon
2L	85819	86111	Peak48	intron
2L	86338	87907	Peak49	promoter
2L	88509	92577	Peak50	intergenic
2L	94110	94346	Peak51	intergenic
2L	94598	95815	Peak52	promoter
2L	95944	96251	Peak53	exon
2L	102128	102981	Peak54	promoter
2L	104442	104928	Peak55	exon
2L	106062	106888	Peak56	promoter
2L	107090	108461	Peak57	promoter
2L	108562	109701	Peak58	promoter
2L	109950	110349	Peak59	intron
2L	110731	111257	Peak60	exon
2L	111854	112100	Peak61	exon
2L	114482	115046	Peak62	promoter
2L	115116	115574	Peak63	intron
2L	120491	120786	Peak64	promoter
2L	121433	121707	Peak65	intron
2L	124197	125001	Peak66	exon
2L	128991	129360	Peak67	promoter
2L	131856	132210	Peak68	promoter
2L	134636	134923	Peak69	intron
2L	138177	138450	Peak70	intron
2L	138803	139318	Peak71	exon
2L	141219	141654	Peak72	exon
2L	142924	144089	Peak73	promoter
2L	147589	147787	Peak74	exon
2L	149736	150043	Peak75	intron
2L	150593	150957	Peak76	intron
2L	152813	153421	Peak77	promoter
2L	154054	157658	Peak78	promoter
2L	157726	159813	Peak79	promoter
2L	160298	162384	Peak80	intron
2L	162631	163032	Peak81	exon
2L	163087	163819	Peak82	intron
2L	165087	167244	Peak83	intron
2L	167726	167994	Peak84	intron
2L	168126	168439	Peak85	intron
2L	168474	168860	Peak86	intron
2L	169124	169893	Peak87	intron
2L	170423	170678	Peak88	intron
2L	171403	172028	Peak89	intron
2L	172463	173642	Peak90	intron
2L	175455	176203	Peak91	intron
2L	178143	179598	Peak92	intron
2L	180101	181926	Peak93	intron
2L	182173	187021	Peak94	promoter
2L	187457	188750	Peak95	exon
2L	188817	189704	Peak96	exon
2L	189788	190105	Peak97	exon
2L	190194	191396	Peak98	exon
2L	191490	191893	Peak99	exon
2L	192623	193849	Peak100	exon
2L	193944	200053	Peak101	exon
2L	200113	201497	Peak102	exon
2L	202013	202360	Peak103	UTR
2L	203315	204730	Peak104	promoter
2L	204934	206356	Peak105	exon
2L	206818	211002	Peak106	promoter
2L	211093	218870	Peak107	exon
2L	219290	225855	Peak108	promoter
2L	225907	226991	Peak109	exon
2L	227091	228568	Peak110	exon
2L	228717	229476	Peak111	exon
2L	229781	230066	Peak112	intron
2L	230442	231210	Peak113	exon
2L	231527	231726	Peak114	intron
2L	231812	242794	Peak115	promoter
2L	243038	244008	Peak116	intron
2L	244102	254308	Peak117	promoter
2L	254531	254779	Peak118	promoter
2L	256532	256725	Peak119	intron
2L	257104	257308	Peak120	intron
2L	261578	261893	Peak121	intron
2L	267190	267621	Peak122	promoter
2L	269638	269880	Peak123	exon
2L	270058	271472	Peak124	exon
2L	271618	272253	Peak125	promoter
2L	272376	274648	Peak126	promoter
2L	274859	275236	Peak127	exon
2L	275476	275698	Peak128	exon
2L	276080	276451	Peak129	exon
2L	276556	279866	Peak130	promoter
2L	279935	280882	Peak131	exon
2L	281035	281532	Peak132	exon
2L	281673	283453	Peak133	promoter
2L	283708	284341	Peak134	exon
2L	284550	285939	Peak135	promoter
2L	286102	287205	Peak136	promoter
2L	291633	291918	Peak137	promoter
2L	292284	294782	Peak138	promoter
2L	294975	296802	Peak139	promoter
2L	296980	297604	Peak140	UTR
2L	297685	298596	Peak141	promoter
2L	305397	306048	Peak142	promoter
2L	346241	346449	Peak143	UTR
2L	346637	347216	Peak144	UTR
2L	347682	347887	Peak145	UTR
2L	355835	358363	Peak146	promoter
2L	368738	369032	Peak147	intergenic
2L	371031	371271	Peak148	intergenic
2L	372309	372551	Peak149	intergenic
2L	376545	377059	Peak150	intergenic
2L	377714	378241	Peak151	promoter
2L	393665	393883	Peak152	intergenic
2L	402133	402385	Peak153	promoter
2L	403662	404687	Peak154	promoter
2L	410052	410624	Peak155	exon
2L	412717	413040	Peak156	promoter
2L	414436	415875	Peak157	promoter
2L	417411	417512	Peak158	exon
2L	418666	420659	Peak159	promoter
2L	420865	421702	Peak160	promoter
2L	421767	422013	Peak161	promoter
2L	422081	422274	Peak162	exon
2L	422691	423191	Peak163	intergenic
2L	428158	428353	Peak164	intergenic
2L	430476	432243	Peak165	promoter
2L	438378	438608	Peak166	UTR
2L	441314	442786	Peak167	intron
2L	447099	447459	Peak168	exon
2L	451012	451312	Peak169	promoter
2L	452567	453587	Peak170	promoter
2L	455338	455684	Peak171	promoter
2L	455759	455999	Peak172	intron
2L	478697	479443	Peak173	intron
2L	479648	480493	Peak174	promoter
2L	480637	481552	Peak175	intron
2L	490084	491095	Peak176	promoter
2L	491893	492587	Peak177	intron
2L	501812	502047	Peak178	intron
2L	510491	511116	Peak179	intron
2L	514425	514834	Peak180	intron
2L	515042	515373	Peak181	intron
2L	516829	517217	Peak182	intron
2L	517504	519926	Peak183	intron
2L	520466	520695	Peak184	intron
2L	520960	521449	Peak185	intron
2L	521562	522706	Peak186	intron
2L	522933	524130	Peak187	promoter
2L	524366	524955	Peak188	intron
2L	525390	526155	Peak189	intron
2L	526754	527038	Peak190	intron
2L	527278	527651	Peak191	intron
2L	530031	530766	Peak192	intron
2L	530954	532098	Peak193	intron
2L	532497	532975	Peak194	intron
2L	533640	534011	Peak195	intron
2L	534387	535578	Peak196	intron
2L	535593	535833	Peak197	intron
2L	536335	536688	Peak198	exon
2L	536804	537469	Peak199	exon
2L	537547	539195	Peak200	exon
2L	539231	542726	Peak201	promoter
2L	543012	544849	Peak202	promoter
2L	544913	545263	Peak203	promoter
2L	548053	548418	Peak204	exon
2L	563959	564606	Peak205	promoter
2L	567679	569045	Peak206	promoter
2L	573744	574600	Peak207	promoter
2L	576805	577110	Peak208	promoter
2L	582964	583332	Peak209	intergenic
2L	587836	588133	Peak210	intron
2L	589640	590437	Peak211	intron
2L	594550	595407	Peak212	promoter
2L	597096	597291	Peak213	intergenic
2L	597706	598230	Peak214	intergenic
2L	599282	599961	Peak215	intergenic
2L	600004	600202	Peak216	intergenic
2L	600357	601047	Peak217	intergenic
2L	601406	602291	Peak218	intergenic
2L	602387	603312	Peak219	promoter
2L	603582	603816	Peak220	UTR
2L	604106	604315	Peak221	UTR
2L	605637	607078	Peak222	intergenic
2L	610179	610532	Peak223	intergenic
2L	619656	619958	Peak224	intergenic
2L	635202	635482	Peak225	intergenic
2L	638556	639177	Peak226	intergenic
2L	660757	661107	Peak227	intron
2L	664274	664767	Peak228	intron
2L	665574	665831	Peak229	intron
2L	667403	668070	Peak230	intron
2L	668882	669222	Peak231	intron
2L	670018	670283	Peak232	intron
2L	671335	671952	Peak233	intron
2L	672096	672419	Peak234	intron
2L	684130	684439	Peak235	intron
2L	685044	685316	Peak236	intron
2L	701204	702485	Peak237	intron
2L	704803	705264	Peak238	intron
2L	708152	708704	Peak239	intron
2L	712694	713946	Peak240	intron
2L	714187	714604	Peak241	UTR
2L	714800	715941	Peak242	promoter
2L	716291	716704	Peak243	intergenic
2L	717402	717766	Peak244	intergenic
2L	740125	740341	Peak245	intron
2L	801334	801555	Peak246	intergenic
2L	815848	816309	Peak247	promoter
2L	818477	818802	Peak248	exon
2L	819208	819461	Peak249	exon
2L	819792	821154	Peak250	promoter
2L	821280	822224	Peak251	promoter
2L	823699	823734	Peak252	intergenic
2L	823844	823970	Peak253	UTR
2L	824513	827140	Peak254	promoter
2L	827195	827424	Peak255	intron
2L	827826	828867	Peak256	intron
2L	829274	829540	Peak257	intron
2L	829640	829944	Peak258	exon
2L	830003	830456	Peak259	exon
2L	830705	832952	Peak260	exon
2L	833090	834649	Peak261	UTR
2L	834737	835622	Peak262	exon
2L	835827	836375	Peak263	exon
2L	836514	837412	Peak264	exon
2L	837526	838924	Peak265	intron
2L	839213	840423	Peak266	intron
2L	840475	840969	Peak267	intron
2L	841724	841963	Peak268	intron
2L	842623	843521	Peak269	promoter
2L	843766	844348	Peak270	intron
2L	844439	845606	Peak271	intron
2L	845960	846917	Peak272	intron
2L	847620	849009	Peak273	intron
2L	849206	854536	Peak274	promoter
2L	855276	856128	Peak275	promoter
2L	856337	857090	Peak276	UTR
2L	865085	865313	Peak277	intron
2L	865613	866412	Peak278	promoter
2L	867000	869980	Peak279	promoter
2L	870297	873596	Peak280	promoter
2L	873723	874511	Peak281	intron
2L	900811	901942	Peak282	exon
2L	921882	922081	Peak283	intergenic
2L	922558	922908	Peak284	promoter
2L	974254	974484	Peak285	intergenic
2L	1006524	1006881	Peak286	intergenic
2L	1007088	1008379	Peak287	UTR
2L	1049249	1049652	Peak288	intergenic
2L	1050395	1050873	Peak289	UTR
2L	1051864	1053377	Peak290	exon
2L	1053464	1053800	Peak291	intron
2L	1054738	1054965	Peak292	intron
2L	1055024	1055481	Peak293	intron
2L	1055601	1055960	Peak294	intron
2L	1056375	1056987	Peak295	intron
2L	1057154	1058022	Peak296	intron
2L	1058444	1058915	Peak297	intron
2L	1059876	1060183	Peak298	intron
2L	1060629	1061221	Peak299	intron
2L	1061382	1061701	Peak300	exon
2L	1061803	1064273	Peak301	exon
2L	1064469	1069619	Peak302	intron
2L	1069970	1070205	Peak303	intron
2L	1072225	1072492	Peak304	intron
2L	1073974	1074543	Peak305	intron
2L	1075058	1075279	Peak306	intron
2L	1075469	1078481	Peak307	promoter
2L	1078663	1078948	Peak308	exon
2L	1080771	1081385	Peak309	promoter
2L	1086764	1086972	Peak310	intron
2L	1107940	1108736	Peak311	promoter
2L	1114298	1114585	Peak312	intergenic
2L	1115285	1115992	Peak313	exon
2L	1116380	1121207	Peak314	promoter
2L	1122096	1122706	Peak315	intron
2L	1128065	1129648	Peak316	promoter
2L	1142657	1143191	Peak317	intergenic
2L	1147698	1148099	Peak318	promoter
2L	1150322	1151012	Peak319	promoter
2L	1156190	1156824	Peak320	promoter
2L	1157249	1158350	Peak321	promoter
2L	1158576	1159334	Peak322	promoter
2L	1169600	1170005	Peak323	promoter
2L	1172609	1173356	Peak324	promoter
2L	1177541	1177814	Peak325	promoter
2L	1177938	1178079	Peak326	UTR
2L	1183871	1184294	Peak327	promoter
2L	1263901	1264371	Peak328	intron
2L	1308646	1308935	Peak329	intergenic
2L	1360416	1360760	Peak330	intergenic
2L	1371425	1371773	Peak331	intergenic
2L	1372663	1372876	Peak332	intergenic
2L	1375296	1375947	Peak333	intergenic
2L	1376402	1376659	Peak334	intergenic
2L	1377114	1377329	Peak335	intergenic
2L	1378670	1379166	Peak336	intergenic
2L	1379365	1383405	Peak337	exon
2L	1384032	1384271	Peak338	intron
2L	1384627	1390600	Peak339	exon
2L	1390781	1396473	Peak340	exon
2L	1396547	1398779	Peak341	exon
2L	1399258	1403495	Peak342	intron
2L	1403547	1404421	Peak343	intron
2L	1404575	1418874	Peak344	intron
2L	1419045	1423192	Peak345	promoter
2L	1425884	1426639	Peak346	intergenic
2L	1429419	1430070	Peak347	intergenic
2L	1430389	1431049	Peak348	intergenic
2L	1431683	1431992	Peak349	intergenic
2L	1432304	1432591	Peak350	intergenic
2L	1435042	1435291	Peak351	intergenic
2L	1435633	1436011	Peak352	intergenic
2L	1436221	1436479	Peak353	intergenic
2L	1439598	1440089	Peak354	intergenic
2L	1444976	1445230	Peak355	intergenic
2L	1445305	1445553	Peak356	intergenic
2L	1449565	1449821	Peak357	intergenic
2L	1449968	1450310	Peak358	intergenic
2L	1456532	1456758	Peak359	intergenic
2L	1457078	1457436	Peak360	intergenic
2L	1458537	1459132	Peak361	intergenic
2L	1460773	1461683	Peak362	intergenic
2L	1461786	1462836	Peak363	intergenic
2L	1463068	1464211	Peak364	intergenic
2L	1464463	1464845	Peak365	intergenic
2L	1465112	1465398	Peak366	intergenic
2L	1473096	1473511	Peak367	intergenic
2L	1474030	1474726	Peak368	intergenic
2L	1476492	1476810	Peak369	intergenic
2L	1478374	1479057	Peak370	intergenic
2L	1485865	1486552	Peak371	intergenic
2L	1491914	1492109	Peak372	intergenic
2L	1492245	1492662	Peak373	promoter
2L	1502514	1503104	Peak374	promoter
2L	1503671	1503876	Peak375	intergenic
2L	1504325	1504796	Peak376	intergenic
2L	1508102	1508628	Peak377	intergenic
2L	1508862	1509394	Peak378	intergenic
2L	1509657	1509894	Peak379	intergenic
2L	1510275	1510649	Peak380	intergenic
2L	1510872	1511191	Peak381	intergenic
2L	1516924	1518750	Peak382	promoter
2L	1524433	1524635	Peak383	intergenic
2L	1524970	1525645	Peak384	intergenic
2L	1554361	1554631	Peak385	intergenic
2L	1556738	1557025	Peak386	intron
2L	1559691	1559943	Peak387	intron
2L	1611050	1611238	Peak388	promoter
2L	1613897	1614385	Peak389	promoter
2L	1654305	1654591	Peak390	intron
2L	1668646	1668899	Peak391	intron
2L	1669625	1670015	Peak392	intron
2L	1688352	1688658	Peak393	intron
2L	1704752	1705402	Peak394	promoter
2L	1709945	1711229	Peak395	promoter
2L	1715509	1716049	Peak396	promoter
2L	1722537	1722794	Peak397	intron
2L	1723217	1723540	Peak398	intron
2L	1723683	1723996	Peak399	intron
2L	1724202	1724494	Peak400	promoter
2L	1727929	1728202	Peak401	intron
2L	1728342	1729019	Peak402	promoter
2L	1729744	1729981	Peak403	promoter
2L	1730651	1730921	Peak404	exon
2L	1732182	1732654	Peak405	promoter
2L	1736924	1737542	Peak406	promoter
2L	1751995	1752206	Peak407	promoter
2L	1755965	1756180	Peak408	exon
2L	1759002	1759262	Peak409	promoter
2L	1884333	1885540	Peak410	promoter
2L	1885866	1886102	Peak411	intron
2L	1886279	1887273	Peak412	intron
2L	1887496	1887823	Peak413	intron
2L	1909739	1910276	Peak414	intron
2L	1938029	1938620	Peak415	exon
2L	1954304	1955205	Peak416	promoter
2L	1957306	1957906	Peak417	intron
2L	1957964	1958838	Peak418	intron
2L	1960768	1961334	Peak419	intron
2L	1962110	1962431	Peak420	intron
2L	1969047	1969362	Peak421	intron
2L	1970308	1971028	Peak422	promoter
2L	1972386	1973550	Peak423	intergenic
2L	1973972	1974710	Peak424	promoter
2L	1974779	1974993	Peak425	exon
2L	1982035	1982329	Peak426	promoter
2L	2008713	2010414	Peak427	promoter
2L	2010543	2011144	Peak428	intron
2L	2013011	2014513	Peak429	intron
2L	2014703	2014969	Peak430	intron
2L	2031522	2031822	Peak431	intergenic
2L	2035882	2036120	Peak432	promoter
2L	2037461	2038819	Peak433	promoter
2L	2038882	2039130	Peak434	intron
2L	2041161	2041521	Peak435	exon
2L	2044698	2044897	Peak436	intergenic
2L	2045013	2045820	Peak437	promoter
2L	2094381	2094715	Peak438	exon
2L	2110390	2110737	Peak439	intergenic
2L	2130277	2130610	Peak440	intergenic
2L	2144546	2145284	Peak441	promoter
2L	2145840	2146414	Peak442	exon
2L	2146560	2147970	Peak443	promoter
2L	2151168	2151443	Peak444	exon
2L	2151665	2151864	Peak445	promoter
2L	2151923	2152268	Peak446	exon
2L	2154603	2155073	Peak447	exon
2L	2155459	2156528	Peak448	promoter
2L	2156649	2157260	Peak449	UTR
2L	2157906	2160635	Peak450	exon
2L	2160931	2166231	Peak451	promoter
2L	2166284	2167662	Peak452	intron
2L	2167747	2169102	Peak453	intron
2L	2169184	2169645	Peak454	intron
2L	2170285	2170569	Peak455	intron
2L	2170660	2171173	Peak456	intron
2L	2171824	2173365	Peak457	intron
2L	2173493	2174038	Peak458	intron
2L	2174370	2174641	Peak459	intron
2L	2174869	2175152	Peak460	intron
2L	2175211	2175962	Peak461	intron
2L	2176337	2177085	Peak462	intron
2L	2177280	2177505	Peak463	intron
2L	2178043	2179056	Peak464	promoter
2L	2179944	2180235	Peak465	intergenic
2L	2180440	2181043	Peak466	intergenic
2L	2181346	2183795	Peak467	intergenic
2L	2188751	2189752	Peak468	intergenic
2L	2190461	2190999	Peak469	exon
2L	2191388	2192751	Peak470	promoter
2L	2193558	2193781	Peak471	intron
2L	2194730	2194997	Peak472	intron
2L	2195440	2195903	Peak473	intron
2L	2196333	2197450	Peak474	intron
2L	2197574	2198125	Peak475	promoter
2L	2198544	2198791	Peak476	intergenic
2L	2200288	2200601	Peak477	intergenic
2L	2201496	2201845	Peak478	intergenic
2L	2202055	2202992	Peak479	intergenic
2L	2216114	2216439	Peak480	promoter
2L	2217120	2217711	Peak481	promoter
2L	2220626	2220836	Peak482	promoter
2L	2221611	2222171	Peak483	promoter
2L	2226424	2227452	Peak484	promoter
2L	2236093	2236470	Peak485	exon
2L	2236601	2237103	Peak486	promoter
2L	2293200	2293493	Peak487	intergenic
2L	2308913	2309342	Peak488	exon
2L	2311452	2311768	Peak489	promoter
2L	2350390	2350623	Peak490	intron
2L	2357252	2357946	Peak491	promoter
2L	2362793	2363260	Peak492	intron
2L	2363525	2363700	Peak493	intron
2L	2363804	2366847	Peak494	promoter
2L	2367268	2367527	Peak495	exon
2L	2367841	2368171	Peak496	exon
2L	2370283	2370824	Peak497	exon
2L	2374485	2374827	Peak498	promoter
2L	2375337	2376754	Peak499	promoter
2L	2380489	2381459	Peak500	promoter
2L	2388535	2388901	Peak501	intergenic
2L	2444240	2444461	Peak502	intron
2L	2447335	2447676	Peak503	intron
2L	2447906	2448788	Peak504	intron
2L	2449502	2450321	Peak505	promoter
2L	2450751	2451595	Peak506	promoter
2L	2451705	2452004	Peak507	intron
2L	2453392	2454077	Peak508	intron
2L	2454232	2455969	Peak509	promoter
2L	2456250	2458701	Peak510	exon
2L	2458813	2459065	Peak511	UTR
2L	2459236	2459501	Peak512	UTR
2L	2459847	2460135	Peak513	intergenic
2L	2460864	2461866	Peak514	intergenic
2L	2461943	2462810	Peak515	intergenic
2L	2462870	2462879	Peak516	intergenic
2L	2463188	2463360	Peak517	intergenic
2L	2466582	2466818	Peak518	intergenic
2L	2492179	2493484	Peak519	promoter
2L	2493645	2494810	Peak520	intron
2L	2524382	2524665	Peak521	intergenic
2L	2525180	2525485	Peak522	intergenic
2L	2574545	2580660	Peak523	promoter
2L	2585108	2585601	Peak524	promoter
2L	2612020	2612419	Peak525	intergenic
2L	2642420	2642676	Peak526	intergenic
2L	2677459	2677846	Peak527	promoter
2L	2739872	2740137	Peak528	promoter
2L	2747648	2747840	Peak529	exon
2L	2747992	2748852	Peak530	promoter
2L	2749238	2751971	Peak531	promoter
2L	2752135	2756352	Peak532	promoter
2L	2756556	2758373	Peak533	UTR
2L	2758489	2760834	Peak534	promoter
2L	2765373	2767072	Peak535	promoter
2L	2767312	2768480	Peak536	promoter
2L	2768701	2770748	Peak537	promoter
2L	2772376	2772629	Peak538	intergenic
2L	2779446	2779809	Peak539	UTR
2L	2780335	2780579	Peak540	UTR
2L	2804620	2805006	Peak541	intergenic
2L	2805062	2805262	Peak542	promoter
2L	2807301	2807656	Peak543	intron
2L	2807953	2808463	Peak544	promoter
2L	2814587	2815445	Peak545	exon
2L	2822676	2822943	Peak546	intron
2L	2855431	2856651	Peak547	promoter
2L	2856708	2857841	Peak548	promoter
2L	2858031	2858418	Peak549	intron
2L	2861398	2861971	Peak550	intron
2L	2862241	2862786	Peak551	promoter
2L	2864268	2864499	Peak552	intron
2L	2872712	2873017	Peak553	intron
2L	2873076	2876427	Peak554	promoter
2L	2877902	2879768	Peak555	promoter
2L	2880095	2880431	Peak556	exon
2L	2882453	2882546	Peak557	UTR
2L	2882823	2883278	Peak558	promoter
2L	2884131	2884626	Peak559	intron
2L	2884755	2887314	Peak560	promoter
2L	2887919	2889592	Peak561	promoter
2L	2892662	2892851	Peak562	intron
2L	2894089	2894737	Peak563	intron
2L	2896801	2897606	Peak564	intron
2L	2898275	2898585	Peak565	intron
2L	2900452	2900790	Peak566	intron
2L	2907724	2908287	Peak567	intron
2L	2908728	2909418	Peak568	intron
2L	2909481	2909905	Peak569	intron
2L	2915014	2915377	Peak570	intron
2L	2915526	2915797	Peak571	intron
2L	2920120	2920478	Peak572	intron
2L	2945727	2946232	Peak573	intron
2L	2955646	2956032	Peak574	intron
2L	2956911	2957503	Peak575	promoter
2L	2957865	2958368	Peak576	intron
2L	2967010	2967372	Peak577	UTR
2L	2968553	2968977	Peak578	exon
2L	2969181	2970666	Peak579	promoter
2L	2971626	2972675	Peak580	promoter
2L	2972745	2973020	Peak581	promoter
2L	2973110	2973209	Peak582	intergenic
2L	2976444	2977764	Peak583	promoter
2L	2978007	2978282	Peak584	exon
2L	2978592	2979396	Peak585	promoter
2L	2979688	2980398	Peak586	exon
2L	2981690	2981891	Peak587	exon
2L	2987198	2989580	Peak588	promoter
2L	2990094	2990962	Peak589	exon
2L	2992057	2992269	Peak590	exon
2L	2992364	2994124	Peak591	promoter
2L	2996792	2997031	Peak592	exon
2L	2997847	2998262	Peak593	exon
2L	2998648	3001607	Peak594	promoter
2L	3001641	3001969	Peak595	intron
2L	3004615	3006088	Peak596	intron
2L	3006895	3007436	Peak597	intron
2L	3008891	3009285	Peak598	intron
2L	3013131	3013607	Peak599	exon
2L	3013673	3014485	Peak600	exon
2L	3018179	3018543	Peak601	promoter
2L	3018695	3019040	Peak602	UTR
2L	3022642	3023673	Peak603	promoter
2L	3025724	3026341	Peak604	exon
2L	3028648	3029391	Peak605	promoter
2L	3030377	3030873	Peak606	promoter
2L	3037143	3037352	Peak607	promoter
2L	3037404	3037662	Peak608	promoter
2L	3039834	3040114	Peak609	promoter
2L	3040296	3040611	Peak610	exon
2L	3041825	3042079	Peak611	UTR
2L	3046587	3047047	Peak612	intron
2L	3048197	3049225	Peak613	exon
2L	3055824	3056080	Peak614	UTR
2L	3059035	3059365	Peak615	intron
2L	3067621	3067991	Peak616	UTR
2L	3068827	3073030	Peak617	promoter
2L	3078272	3079093	Peak618	intron
2L	3079410	3079913	Peak619	intron
2L	3080185	3080860	Peak620	exon
2L	3082655	3084226	Peak621	intron
2L	3094911	3095292	Peak622	intron
2L	3108319	3108598	Peak623	intron
2L	3131655	3131984	Peak624	intron
2L	3144780	3144985	Peak625	promoter
2L	3145497	3145849	Peak626	promoter
2L	3147398	3147891	Peak627	exon
2L	3152645	3153330	Peak628	promoter
2L	3158010	3158314	Peak629	intron
2L	3158697	3159002	Peak630	intron
2L	3159076	3159784	Peak631	promoter
2L	3163537	3164168	Peak632	promoter
2L	3165200	3165694	Peak633	intron
2L	3169443	3169774	Peak634	UTR
2L	3169902	3171887	Peak635	promoter
2L	3172234	3173339	Peak636	UTR
2L	3173477	3173604	Peak637	exon
2L	3177239	3177581	Peak638	intron
2L	3199607	3199915	Peak639	promoter
2L	3265642	3265930	Peak640	intergenic
2L	3301991	3302411	Peak641	intron
2L	3302907	3303835	Peak642	promoter
2L	3319787	3320054	Peak643	promoter
2L	3372548	3372896	Peak644	exon
2L	3373293	3373604	Peak645	promoter
2L	3376631	3377081	Peak646	promoter
2L	3422922	3423163	Peak647	promoter
2L	3425994	3426411	Peak648	intron
2L	3452355	3452773	Peak649	promoter
2L	3456567	3457502	Peak650	promoter
2L	3464788	3464874	Peak651	intergenic
2L	3465275	3466558	Peak652	promoter
2L	3466781	3467016	Peak653	exon
2L	3469111	3470244	Peak654	promoter
2L	3472108	3472799	Peak655	promoter
2L	3475393	3475757	Peak656	intergenic
2L	3476239	3476963	Peak657	intergenic
2L	3477050	3477369	Peak658	intergenic
2L	3477707	3478794	Peak659	promoter
2L	3491026	3491304	Peak660	promoter
2L	3497638	3497849	Peak661	intron
2L	3504837	3505458	Peak662	intron
2L	3529958	3530542	Peak663	promoter
2L	3532215	3532683	Peak664	exon
2L	3532920	3533727	Peak665	intergenic
2L	3538537	3540320	Peak666	promoter
2L	3540973	3542448	Peak667	intron
2L	3543345	3543735	Peak668	intron
2L	3545122	3545360	Peak669	UTR
2L	3545456	3545946	Peak670	exon
2L	3548814	3550286	Peak671	intergenic
2L	3552691	3552897	Peak672	intergenic
2L	3553018	3553290	Peak673	intergenic
2L	3556129	3556484	Peak674	intergenic
2L	3579532	3581266	Peak675	promoter
2L	3587895	3588525	Peak676	intergenic
2L	3589291	3589568	Peak677	intergenic
2L	3594114	3594485	Peak678	intergenic
2L	3601152	3601506	Peak679	intergenic
2L	3602193	3603458	Peak680	intergenic
2L	3604196	3607508	Peak681	promoter
2L	3608367	3610066	Peak682	intergenic
2L	3610201	3611490	Peak683	intergenic
2L	3611851	3612194	Peak684	intergenic
2L	3612884	3613304	Peak685	intergenic
2L	3613552	3613888	Peak686	intergenic
2L	3614109	3615923	Peak687	intergenic
2L	3616261	3616927	Peak688	intergenic
2L	3618074	3618578	Peak689	intergenic
2L	3618755	3620013	Peak690	promoter
2L	3631330	3633266	Peak691	promoter
2L	3633506	3633885	Peak692	intron
2L	3633932	3634280	Peak693	intron
2L	3646071	3646317	Peak694	promoter
2L	3655619	3656374	Peak695	intron
2L	3657277	3657827	Peak696	intergenic
2L	3657910	3658187	Peak697	intergenic
2L	3662374	3662818	Peak698	promoter
2L	3667756	3667968	Peak699	intron
2L	3713069	3713508	Peak700	promoter
2L	3763124	3763341	Peak701	intron
2L	3767628	3768010	Peak702	exon
2L	3769534	3769860	Peak703	intergenic
2L	3770030	3770609	Peak704	intergenic
2L	3770881	3772287	Peak705	promoter
2L	3772938	3773148	Peak706	intron
2L	3773539	3773832	Peak707	intron
2L	3775331	3776117	Peak708	intron
2L	3776201	3776647	Peak709	intron
2L	3776822	3777257	Peak710	intron
2L	3778468	3779125	Peak711	promoter
2L	3786233	3786603	Peak712	UTR
2L	3803347	3804126	Peak713	promoter
2L	3805589	3806814	Peak714	promoter
2L	3811128	3811497	Peak715	exon
2L	3813190	3813586	Peak716	promoter
2L	3817625	3819350	Peak717	intergenic
2L	3819814	3820599	Peak718	intergenic
2L	3821167	3822079	Peak719	intergenic
2L	3822207	3823209	Peak720	intergenic
2L	3823606	3824421	Peak721	intergenic
2L	3824614	3825056	Peak722	intergenic
2L	3825232	3827100	Peak723	promoter
2L	3827209	3827806	Peak724	intergenic
2L	3827865	3828262	Peak725	intergenic
2L	3828808	3829882	Peak726	intergenic
2L	3833630	3834568	Peak727	intergenic
2L	3835342	3835734	Peak728	intergenic
2L	3836325	3837040	Peak729	promoter
2L	3838155	3838437	Peak730	exon
2L	3842381	3842627	Peak731	intergenic
2L	3842817	3843153	Peak732	intergenic
2L	3845235	3845753	Peak733	intergenic
2L	3853225	3853709	Peak734	intergenic
2L	3853800	3854014	Peak735	intergenic
2L	3854252	3854911	Peak736	intergenic
2L	3860595	3860996	Peak737	intergenic
2L	3861164	3862109	Peak738	intergenic
2L	3862476	3863060	Peak739	promoter
2L	3867480	3867824	Peak740	promoter
2L	3872111	3872633	Peak741	promoter
2L	3895961	3896340	Peak742	promoter
2L	3914588	3915031	Peak743	intron
2L	3975063	3975297	Peak744	intron
2L	3991780	3991995	Peak745	intergenic
2L	4021926	4022340	Peak746	intergenic
2L	4023537	4024061	Peak747	intergenic
2L	4028204	4029205	Peak748	intergenic
2L	4030083	4030959	Peak749	intergenic
2L	4031123	4032207	Peak750	promoter
2L	4032568	4033213	Peak751	intron
2L	4033332	4033585	Peak752	intron
2L	4033935	4035330	Peak753	intron
2L	4036535	4036768	Peak754	intron
2L	4037325	4037782	Peak755	intron
2L	4037955	4038371	Peak756	intron
2L	4040328	4040530	Peak757	intron
2L	4040665	4041370	Peak758	intron
2L	4042820	4044367	Peak759	intron
2L	4045086	4045585	Peak760	intron
2L	4045638	4046164	Peak761	intron
2L	4047095	4047459	Peak762	intron
2L	4047718	4048470	Peak763	intron
2L	4048982	4049258	Peak764	intron
2L	4049733	4051632	Peak765	intron
2L	4051983	4052194	Peak766	intron
2L	4052400	4053100	Peak767	intron
2L	4053221	4057380	Peak768	intron
2L	4058061	4058610	Peak769	intron
2L	4059367	4059788	Peak770	intron
2L	4059908	4060197	Peak771	intron
2L	4060467	4061332	Peak772	intron
2L	4061510	4061813	Peak773	intron
2L	4063121	4063615	Peak774	intron
2L	4064622	4065327	Peak775	intron
2L	4065504	4066064	Peak776	intron
2L	4069114	4069609	Peak777	intron
2L	4069853	4071172	Peak778	intron
2L	4071284	4072184	Peak779	intron
2L	4073027	4074078	Peak780	intron
2L	4074422	4075309	Peak781	exon
2L	4075419	4075773	Peak782	intron
2L	4076024	4076437	Peak783	intron
2L	4076863	4077319	Peak784	intron
2L	4077384	4077602	Peak785	intron
2L	4077767	4078501	Peak786	intron
2L	4078822	4079271	Peak787	intron
2L	4079452	4081966	Peak788	exon
2L	4082088	4082517	Peak789	intron
2L	4082955	4083606	Peak790	intron
2L	4083820	4084297	Peak791	intron
2L	4084349	4085797	Peak792	intron
2L	4085876	4086718	Peak793	intron
2L	4087076	4087404	Peak794	intron
2L	4088537	4088804	Peak795	intron
2L	4088864	4089242	Peak796	intron
2L	4089426	4090531	Peak797	intron
2L	4091585	4091876	Peak798	intron
2L	4092107	4092312	Peak799	intron
2L	4093036	4094567	Peak800	intron
2L	4094799	4095272	Peak801	intron
2L	4096031	4097354	Peak802	intron
2L	4097504	4097711	Peak803	intron
2L	4097804	4100460	Peak804	exon
2L	4100534	4102033	Peak805	exon
2L	4102856	4103528	Peak806	intron
2L	4103720	4105608	Peak807	intron
2L	4106188	4106474	Peak808	intron
2L	4106655	4106979	Peak809	intron
2L	4107407	4107896	Peak810	exon
2L	4108161	4108773	Peak811	intron
2L	4110108	4110808	Peak812	intron
2L	4111241	4111965	Peak813	intron
2L	4112644	4112980	Peak814	intron
2L	4113181	4113431	Peak815	intron
2L	4113489	4113863	Peak816	exon
2L	4113930	4114308	Peak817	UTR
2L	4115911	4116401	Peak818	intergenic
2L	4116560	4117321	Peak819	intergenic
2L	4117512	4117730	Peak820	intergenic
2L	4118623	4119029	Peak821	intergenic
2L	4120767	4121261	Peak822	exon
2L	4121569	4121813	Peak823	promoter
2L	4123265	4124014	Peak824	exon
2L	4124752	4125017	Peak825	intergenic
2L	4127002	4127298	Peak826	intergenic
2L	4185959	4186158	Peak827	intergenic
2L	4187653	4187934	Peak828	promoter
2L	4208594	4209257	Peak829	exon
2L	4220388	4220848	Peak830	intron
2L	4221079	4223712	Peak831	promoter
2L	4224183	4224413	Peak832	intergenic
2L	4224500	4224732	Peak833	UTR
2L	4225720	4225865	Peak834	exon
2L	4226147	4226169	Peak835	intergenic
2L	4226224	4227171	Peak836	promoter
2L	4227580	4229141	Peak837	promoter
2L	4256812	4257209	Peak838	intergenic
2L	4279576	4280268	Peak839	intergenic
2L	4280369	4280943	Peak840	intergenic
2L	4281161	4283874	Peak841	promoter
2L	4284084	4284644	Peak842	promoter
2L	4285983	4286190	Peak843	intron
2L	4286579	4287993	Peak844	intron
2L	4288541	4288873	Peak845	intron
2L	4301492	4301718	Peak846	intron
2L	4304314	4304520	Peak847	intron
2L	4312275	4312680	Peak848	intron
2L	4332241	4332520	Peak849	intergenic
2L	4333164	4334404	Peak850	promoter
2L	4334492	4334689	Peak851	intron
2L	4334772	4335288	Peak852	intron
2L	4335698	4336397	Peak853	intron
2L	4337055	4337334	Peak854	intron
2L	4337503	4337528	Peak855	intergenic
2L	4337886	4338220	Peak856	intron
2L	4340138	4340656	Peak857	intron
2L	4344812	4345262	Peak858	UTR
2L	4345535	4346096	Peak859	UTR
2L	4346640	4347286	Peak860	intergenic
2L	4348804	4349027	Peak861	intergenic
2L	4349618	4350140	Peak862	intergenic
2L	4350924	4352384	Peak863	intergenic
2L	4353852	4354137	Peak864	UTR
2L	4354701	4355378	Peak865	intergenic
2L	4357744	4358126	Peak866	intergenic
2L	4362534	4362850	Peak867	exon
2L	4363541	4364942	Peak868	intron
2L	4366469	4367071	Peak869	intron
2L	4367621	4369470	Peak870	intron
2L	4369907	4371224	Peak871	intron
2L	4371294	4374467	Peak872	promoter
2L	4374616	4376112	Peak873	intron
2L	4376521	4376854	Peak874	intron
2L	4377225	4380643	Peak875	exon
2L	4380778	4381728	Peak876	exon
2L	4382231	4382865	Peak877	promoter
2L	4385688	4386198	Peak878	promoter
2L	4386749	4387460	Peak879	promoter
2L	4393751	4393961	Peak880	promoter
2L	4394081	4394353	Peak881	promoter
2L	4403126	4403329	Peak882	promoter
2L	4418907	4419220	Peak883	intron
2L	4444283	4445124	Peak884	promoter
2L	4445533	4445833	Peak885	exon
2L	4448522	4449052	Peak886	promoter
2L	4452619	4453723	Peak887	promoter
2L	4453984	4454730	Peak888	promoter
2L	4456534	4456921	Peak889	promoter
2L	4457307	4458629	Peak890	promoter
2L	4458704	4460327	Peak891	promoter
2L	4461034	4461491	Peak892	exon
2L	4462676	4463093	Peak893	promoter
2L	4463332	4463741	Peak894	promoter
2L	4463866	4464137	Peak895	exon
2L	4464248	4464884	Peak896	exon
2L	4465032	4465259	Peak897	promoter
2L	4523040	4523244	Peak898	exon
2L	4533496	4533897	Peak899	exon
2L	4553762	4553969	Peak900	exon
2L	4568105	4568445	Peak901	intron
2L	4570409	4571153	Peak902	exon
2L	4574445	4575144	Peak903	intron
2L	4591880	4592424	Peak904	promoter
2L	4593655	4593865	Peak905	intron
2L	4594817	4595390	Peak906	promoter
2L	4596880	4598186	Peak907	intron
2L	4610587	4610941	Peak908	intron
2L	4614096	4614746	Peak909	promoter
2L	4684413	4684700	Peak910	promoter
2L	4808228	4808583	Peak911	intergenic
2L	4810097	4811160	Peak912	intergenic
2L	4811272	4812171	Peak913	intergenic
2L	4812241	4813531	Peak914	promoter
2L	4817995	4818459	Peak915	promoter
2L	4818582	4818874	Peak916	intergenic
2L	4819707	4822736	Peak917	promoter
2L	4823049	4824340	Peak918	intron
2L	4824519	4824948	Peak919	intron
2L	4825226	4826211	Peak920	exon
2L	4826516	4827893	Peak921	exon
2L	4828090	4828399	Peak922	UTR
2L	4828702	4831703	Peak923	promoter
2L	4835947	4836118	Peak924	exon
2L	4837538	4839162	Peak925	promoter
2L	4839798	4839954	Peak926	exon
2L	4840663	4841006	Peak927	exon
2L	4843116	4843459	Peak928	exon
2L	4844145	4844356	Peak929	exon
2L	4846686	4847040	Peak930	promoter
2L	4847190	4847449	Peak931	promoter
2L	4849733	4849987	Peak932	exon
2L	4850005	4850749	Peak933	promoter
2L	4852718	4852967	Peak934	promoter
2L	4853132	4853393	Peak935	intron
2L	4856709	4856969	Peak936	intron
2L	4863019	4863419	Peak937	intron
2L	4867792	4868055	Peak938	intron
2L	4880277	4880542	Peak939	exon
2L	4882449	4882660	Peak940	intron
2L	4883351	4883641	Peak941	UTR
2L	4889308	4890216	Peak942	promoter
2L	4890981	4891227	Peak943	exon
2L	4891396	4892554	Peak944	promoter
2L	4893081	4894163	Peak945	intron
2L	4894226	4894327	Peak946	intron
2L	4897478	4897520	Peak947	intergenic
2L	4898019	4898592	Peak948	intron
2L	4901303	4903806	Peak949	exon
2L	4906661	4906905	Peak950	promoter
2L	4945507	4945876	Peak951	promoter
2L	4946208	4946441	Peak952	intron
2L	4949448	4950024	Peak953	promoter
2L	4955421	4955674	Peak954	promoter
2L	4965951	4966288	Peak955	exon
2L	4967592	4968133	Peak956	promoter
2L	4968623	4969128	Peak957	promoter
2L	4969188	4970042	Peak958	exon
2L	4970957	4972030	Peak959	promoter
2L	4973867	4974114	Peak960	promoter
2L	4974251	4974324	Peak961	intergenic
2L	4976293	4977811	Peak962	promoter
2L	4980918	4981852	Peak963	promoter
2L	4991448	4991744	Peak964	exon
2L	4994507	4994990	Peak965	exon
2L	4995281	4996011	Peak966	promoter
2L	4996972	4997206	Peak967	intron
2L	4998076	4998295	Peak968	intron
2L	4999031	5001571	Peak969	promoter
2L	5003800	5004304	Peak970	intron
2L	5009065	5010349	Peak971	promoter
2L	5010635	5011479	Peak972	promoter
2L	5027383	5027683	Peak973	promoter
2L	5036112	5036309	Peak974	intron
2L	5037335	5037820	Peak975	intergenic
2L	5042005	5042271	Peak976	intron
2L	5042434	5043402	Peak977	promoter
2L	5043529	5044022	Peak978	promoter
2L	5044143	5044609	Peak979	promoter
2L	5046414	5046737	Peak980	exon
2L	5049894	5050351	Peak981	promoter
2L	5050692	5050938	Peak982	exon
2L	5052126	5054360	Peak983	promoter
2L	5054542	5056683	Peak984	promoter
2L	5056729	5057214	Peak985	exon
2L	5057788	5058172	Peak986	exon
2L	5059301	5059957	Peak987	promoter
2L	5070875	5071379	Peak988	promoter
2L	5071543	5071772	Peak989	exon
2L	5073320	5074013	Peak990	exon
2L	5092682	5093702	Peak991	promoter
2L	5093860	5094357	Peak992	promoter
2L	5095001	5095238	Peak993	exon
2L	5095520	5095766	Peak994	UTR
2L	5096196	5097182	Peak995	promoter
2L	5100004	5100348	Peak996	promoter
2L	5185475	5185949	Peak997	exon
2L	5186709	5187007	Peak998	intron
2L	5202508	5203038	Peak999	intron
2L	5209309	5209568	Peak1000	UTR
2L	5218335	5218885	Peak1001	exon
2L	5220112	5221682	Peak1002	exon
2L	5222233	5222814	Peak1003	intron
2L	5223185	5224345	Peak1004	intron
2L	5224538	5225036	Peak1005	intron
2L	5225451	5225709	Peak1006	intron
2L	5226510	5227374	Peak1007	intron
2L	5227384	5227440	Peak1008	intergenic
2L	5230497	5231511	Peak1009	intron
2L	5231992	5232569	Peak1010	intron
2L	5232929	5233200	Peak1011	intron
2L	5233469	5234328	Peak1012	intron
2L	5234734	5235579	Peak1013	intron
2L	5236332	5238330	Peak1014	promoter
2L	5238474	5238957	Peak1015	intron
2L	5239317	5241598	Peak1016	exon
2L	5241685	5242110	Peak1017	intron
2L	5242736	5243283	Peak1018	intron
2L	5249777	5250190	Peak1019	intron
2L	5253739	5253987	Peak1020	intron
2L	5261516	5261687	Peak1021	intron
2L	5262524	5262891	Peak1022	intron
2L	5269897	5270559	Peak1023	exon
2L	5270701	5270904	Peak1024	intron
2L	5271011	5271444	Peak1025	promoter
2L	5276224	5277670	Peak1026	promoter
2L	5277998	5278674	Peak1027	promoter
2L	5278928	5279395	Peak1028	promoter
2L	5288714	5289185	Peak1029	promoter
2L	5292253	5292576	Peak1030	intron
2L	5296899	5297233	Peak1031	intron
2L	5301418	5301641	Peak1032	intron
2L	5305178	5305912	Peak1033	promoter
2L	5306449	5307029	Peak1034	intron
2L	5314180	5314424	Peak1035	intron
2L	5322459	5322711	Peak1036	exon
2L	5323498	5323697	Peak1037	exon
2L	5323874	5326909	Peak1038	promoter
2L	5327420	5327900	Peak1039	exon
2L	5328388	5328439	Peak1040	intergenic
2L	5361951	5362245	Peak1041	exon
2L	5362403	5362895	Peak1042	exon
2L	5363687	5363973	Peak1043	intron
2L	5366505	5366767	Peak1044	intergenic
2L	5366941	5367261	Peak1045	intergenic
2L	5370718	5370928	Peak1046	intergenic
2L	5381305	5381813	Peak1047	intergenic
2L	5391849	5392523	Peak1048	intergenic
2L	5400580	5401077	Peak1049	intergenic
2L	5403387	5404194	Peak1050	intergenic
2L	5406428	5406692	Peak1051	intron
2L	5406862	5407325	Peak1052	exon
2L	5410141	5410891	Peak1053	intron
2L	5414609	5415013	Peak1054	intron
2L	5429340	5429684	Peak1055	intergenic
2L	5455542	5455916	Peak1056	intergenic
2L	5456854	5457265	Peak1057	intergenic
2L	5460851	5462116	Peak1058	promoter
2L	5463818	5464306	Peak1059	exon
2L	5464513	5465588	Peak1060	exon
2L	5465929	5466720	Peak1061	exon
2L	5467741	5468248	Peak1062	intergenic
2L	5473800	5474643	Peak1063	intergenic
2L	5475346	5475558	Peak1064	intergenic
2L	5489186	5489442	Peak1065	intergenic
2L	5500153	5500766	Peak1066	intergenic
2L	5524176	5524640	Peak1067	promoter
2L	5525753	5526049	Peak1068	promoter
2L	5526101	5526439	Peak1069	exon
2L	5526861	5527074	Peak1070	promoter
2L	5527149	5527388	Peak1071	exon
2L	5527966	5528243	Peak1072	promoter
2L	5539605	5540602	Peak1073	exon
2L	5540838	5541253	Peak1074	exon
2L	5541382	5541977	Peak1075	exon
2L	5542002	5543757	Peak1076	promoter
2L	5544097	5544675	Peak1077	exon
2L	5544743	5545579	Peak1078	exon
2L	5546098	5546552	Peak1079	UTR
2L	5546696	5547678	Peak1080	promoter
2L	5547821	5548039	Peak1081	intergenic
2L	5550585	5551112	Peak1082	promoter
2L	5658364	5658880	Peak1083	promoter
2L	5723955	5724345	Peak1084	intergenic
2L	5724481	5725220	Peak1085	promoter
2L	5730779	5731205	Peak1086	intron
2L	5739147	5739597	Peak1087	intron
2L	5757112	5757350	Peak1088	intron
2L	5774076	5774288	Peak1089	intron
2L	5777524	5778033	Peak1090	intron
2L	5780607	5780993	Peak1091	intron
2L	5781188	5781479	Peak1092	intron
2L	5783708	5784139	Peak1093	promoter
2L	5788701	5788903	Peak1094	intron
2L	5789114	5790142	Peak1095	intron
2L	5799236	5800487	Peak1096	promoter
2L	5800618	5803927	Peak1097	promoter
2L	5804830	5805872	Peak1098	promoter
2L	5866954	5867229	Peak1099	intron
2L	5870625	5871805	Peak1100	intron
2L	5877491	5878124	Peak1101	intron
2L	5878895	5880096	Peak1102	promoter
2L	5880994	5881275	Peak1103	intergenic
2L	5890540	5891047	Peak1104	intergenic
2L	5891718	5892240	Peak1105	intergenic
2L	5892473	5892731	Peak1106	exon
2L	5902842	5903325	Peak1107	intergenic
2L	5906918	5907911	Peak1108	promoter
2L	5923707	5923897	Peak1109	intergenic
2L	5943472	5944794	Peak1110	promoter
2L	5955847	5956268	Peak1111	exon
2L	5961304	5961983	Peak1112	intergenic
2L	5968097	5968394	Peak1113	intergenic
2L	5968841	5969634	Peak1114	exon
2L	5972040	5972928	Peak1115	UTR
2L	5973859	5974443	Peak1116	intron
2L	5974791	5975398	Peak1117	intron
2L	5976504	5976943	Peak1118	exon
2L	5977054	5985096	Peak1119	promoter
2L	5985294	5985548	Peak1120	UTR
2L	5985704	5987461	Peak1121	promoter
2L	5987474	5987756	Peak1122	exon
2L	5987870	5987952	Peak1123	UTR
2L	5995106	5995311	Peak1124	exon
2L	5996900	5999790	Peak1125	promoter
2L	6000136	6001190	Peak1126	promoter
2L	6004631	6005310	Peak1127	exon
2L	6010635	6010841	Peak1128	intron
2L	6013171	6013372	Peak1129	exon
2L	6019721	6020154	Peak1130	intergenic
2L	6023915	6024657	Peak1131	promoter
2L	6036577	6037042	Peak1132	promoter
2L	6037678	6037955	Peak1133	promoter
2L	6038128	6038248	Peak1134	promoter
2L	6046999	6049704	Peak1135	promoter
2L	6049877	6050445	Peak1136	exon
2L	6050657	6051027	Peak1137	promoter
2L	6051087	6052437	Peak1138	exon
2L	6053938	6054221	Peak1139	intergenic
2L	6062636	6063231	Peak1140	promoter
2L	6065773	6066151	Peak1141	promoter
2L	6070903	6071266	Peak1142	promoter
2L	6071340	6071563	Peak1143	intron
2L	6076147	6076437	Peak1144	intergenic
2L	6078688	6079491	Peak1145	intergenic
2L	6081238	6081566	Peak1146	intergenic
2L	6088188	6088894	Peak1147	intron
2L	6089070	6089485	Peak1148	intron
2L	6091126	6091822	Peak1149	promoter
2L	6098585	6099216	Peak1150	promoter
2L	6125068	6125458	Peak1151	promoter
2L	6156574	6157063	Peak1152	intergenic
2L	6177447	6177907	Peak1153	intergenic
2L	6178438	6179677	Peak1154	promoter
2L	6180033	6180396	Peak1155	intron
2L	6184511	6184883	Peak1156	intron
2L	6186396	6186862	Peak1157	intron
2L	6189011	6189427	Peak1158	intron
2L	6193993	6194230	Peak1159	intron
2L	6204529	6205576	Peak1160	intron
2L	6213130	6213902	Peak1161	intergenic
2L	6216074	6216273	Peak1162	intergenic
2L	6229131	6229863	Peak1163	intergenic
2L	6238528	6238763	Peak1164	intergenic
2L	6240908	6241482	Peak1165	intergenic
2L	6241857	6242505	Peak1166	intergenic
2L	6250120	6250775	Peak1167	intergenic
2L	6252369	6252639	Peak1168	intergenic
2L	6252741	6253169	Peak1169	promoter
2L	6259464	6260022	Peak1170	intron
2L	6316653	6316938	Peak1171	intron
2L	6319161	6319416	Peak1172	intron
2L	6323525	6324657	Peak1173	promoter
2L	6337168	6337366	Peak1174	exon
2L	6337591	6338021	Peak1175	intron
2L	6338093	6339725	Peak1176	promoter
2L	6356902	6357332	Peak1177	UTR
2L	6361815	6362090	Peak1178	intergenic
2L	6372942	6377558	Peak1179	exon
2L	6390343	6390867	Peak1180	intron
2L	6411007	6411741	Peak1181	promoter
2L	6424219	6424693	Peak1182	promoter
2L	6455073	6456845	Peak1183	promoter
2L	6457464	6457691	Peak1184	exon
2L	6467559	6467858	Peak1185	promoter
2L	6472064	6472338	Peak1186	promoter
2L	6473283	6474068	Peak1187	promoter
2L	6474466	6474789	Peak1188	UTR
2L	6476514	6477129	Peak1189	promoter
2L	6479213	6481814	Peak1190	promoter
2L	6488955	6490068	Peak1191	promoter
2L	6490280	6491553	Peak1192	promoter
2L	6498131	6499842	Peak1193	promoter
2L	6502939	6503326	Peak1194	intron
2L	6526950	6527360	Peak1195	UTR
2L	6528070	6528388	Peak1196	exon
2L	6531042	6531459	Peak1197	intron
2L	6532120	6532772	Peak1198	intron
2L	6535711	6536546	Peak1199	promoter
2L	6543749	6544306	Peak1200	intron
2L	6544661	6544968	Peak1201	intron
2L	6545156	6545476	Peak1202	intron
2L	6546928	6547259	Peak1203	promoter
2L	6557409	6558315	Peak1204	promoter
2L	6561366	6561762	Peak1205	promoter
2L	6562006	6562720	Peak1206	promoter
2L	6565848	6566374	Peak1207	promoter
2L	6610397	6612028	Peak1208	promoter
2L	6612273	6613378	Peak1209	exon
2L	6614371	6614573	Peak1210	intron
2L	6622732	6622963	Peak1211	intergenic
2L	6632183	6632681	Peak1212	promoter
2L	6645911	6646708	Peak1213	exon
2L	6646957	6649750	Peak1214	promoter
2L	6667660	6668209	Peak1215	promoter
2L	6673808	6674073	Peak1216	promoter
2L	6677463	6677715	Peak1217	promoter
2L	6683380	6683736	Peak1218	intron
2L	6684144	6684510	Peak1219	promoter
2L	6684604	6685222	Peak1220	exon
2L	6700835	6701191	Peak1221	intron
2L	6715972	6716453	Peak1222	promoter
2L	6716934	6717226	Peak1223	intergenic
2L	6717475	6718031	Peak1224	promoter
2L	6722669	6724608	Peak1225	promoter
2L	6724726	6725251	Peak1226	exon
2L	6734342	6735052	Peak1227	exon
2L	6737612	6738171	Peak1228	exon
2L	6738320	6738596	Peak1229	intron
2L	6792060	6792427	Peak1230	intron
2L	6793627	6795075	Peak1231	promoter
2L	6795150	6795505	Peak1232	intron
2L	6797501	6797742	Peak1233	intron
2L	6798130	6798327	Peak1234	promoter
2L	6820152	6820407	Peak1235	intergenic
2L	6821575	6822177	Peak1236	intergenic
2L	6826303	6826775	Peak1237	intron
2L	6827680	6827931	Peak1238	intron
2L	6830123	6830348	Peak1239	intron
2L	6830618	6830842	Peak1240	intron
2L	6833577	6834104	Peak1241	intron
2L	6841033	6841848	Peak1242	intergenic
2L	6851893	6852700	Peak1243	promoter
2L	6853177	6853449	Peak1244	exon
2L	6854010	6854383	Peak1245	promoter
2L	6866984	6867342	Peak1246	intron
2L	6875086	6875310	Peak1247	UTR
2L	6883026	6883534	Peak1248	intron
2L	6885597	6885839	Peak1249	intron
2L	6886292	6886943	Peak1250	intron
2L	6907370	6908452	Peak1251	promoter
2L	6912247	6912547	Peak1252	exon
2L	6912953	6914767	Peak1253	promoter
2L	6914857	6915442	Peak1254	exon
2L	6915636	6916595	Peak1255	promoter
2L	6916845	6922888	Peak1256	promoter
2L	6923076	6923539	Peak1257	intron
2L	6923788	6924508	Peak1258	exon
2L	6924684	6925589	Peak1259	exon
2L	6925707	6925950	Peak1260	intron
2L	6926219	6926429	Peak1261	intron
2L	6926932	6927297	Peak1262	intron
2L	6927899	6928146	Peak1263	UTR
2L	6939588	6940146	Peak1264	exon
2L	6944824	6945441	Peak1265	promoter
2L	6945599	6945932	Peak1266	exon
2L	6947909	6948207	Peak1267	exon
2L	6948459	6948996	Peak1268	promoter
2L	6949625	6950720	Peak1269	promoter
2L	6956464	6957337	Peak1270	promoter
2L	6957587	6957868	Peak1271	exon
2L	6958653	6958948	Peak1272	exon
2L	6959785	6961783	Peak1273	promoter
2L	6962981	6963486	Peak1274	exon
2L	6963604	6965716	Peak1275	promoter
2L	6966094	6967818	Peak1276	promoter
2L	6967912	6972093	Peak1277	promoter
2L	6972149	6972805	Peak1278	intergenic
2L	6973246	6976266	Peak1279	exon
2L	6976591	6979724	Peak1280	exon
2L	6979835	6980515	Peak1281	exon
2L	6980594	6981620	Peak1282	exon
2L	6981694	6985043	Peak1283	exon
2L	6985905	6986337	Peak1284	intron
2L	6986431	6986675	Peak1285	intron
2L	6988629	6989166	Peak1286	intron
2L	6989380	6989599	Peak1287	intron
2L	6990035	6990725	Peak1288	intron
2L	6991032	6991433	Peak1289	intron
2L	6998694	6998902	Peak1290	intron
2L	7001730	7002119	Peak1291	intron
2L	7002849	7004039	Peak1292	intron
2L	7005511	7005962	Peak1293	intron
2L	7006514	7007074	Peak1294	intron
2L	7007612	7007909	Peak1295	intron
2L	7009127	7009423	Peak1296	intron
2L	7009559	7011365	Peak1297	promoter
2L	7011958	7012252	Peak1298	intergenic
2L	7013188	7013994	Peak1299	promoter
2L	7023199	7024241	Peak1300	promoter
2L	7025475	7025779	Peak1301	exon
2L	7026327	7026406	Peak1302	intergenic
2L	7026545	7027910	Peak1303	promoter
2L	7031650	7031684	Peak1304	intergenic
2L	7031868	7033675	Peak1305	promoter
2L	7035297	7035558	Peak1306	exon
2L	7035626	7036681	Peak1307	exon
2L	7036862	7037470	Peak1308	exon
2L	7037626	7039516	Peak1309	promoter
2L	7039604	7039899	Peak1310	intron
2L	7040397	7041188	Peak1311	exon
2L	7042015	7044534	Peak1312	promoter
2L	7045182	7046256	Peak1313	intron
2L	7046440	7047351	Peak1314	exon
2L	7048473	7050262	Peak1315	promoter
2L	7050550	7051140	Peak1316	exon
2L	7051310	7054798	Peak1317	exon
2L	7055104	7055807	Peak1318	UTR
2L	7056073	7057846	Peak1319	promoter
2L	7057911	7058230	Peak1320	exon
2L	7063810	7064512	Peak1321	promoter
2L	7064740	7066054	Peak1322	promoter
2L	7078929	7079145	Peak1323	intron
2L	7094986	7095281	Peak1324	intergenic
2L	7096439	7097042	Peak1325	intergenic
2L	7119626	7120017	Peak1326	intron
2L	7121989	7122258	Peak1327	intron
2L	7125150	7125651	Peak1328	intron
2L	7133828	7134422	Peak1329	promoter
2L	7134578	7135168	Peak1330	intron
2L	7136761	7136961	Peak1331	intron
2L	7138292	7139015	Peak1332	intron
2L	7148356	7148926	Peak1333	intron
2L	7157534	7157973	Peak1334	promoter
2L	7178888	7179202	Peak1335	intergenic
2L	7181974	7182533	Peak1336	promoter
2L	7193980	7194779	Peak1337	promoter
2L	7199851	7200235	Peak1338	intron
2L	7203540	7203895	Peak1339	intron
2L	7204089	7204459	Peak1340	promoter
2L	7206009	7206349	Peak1341	UTR
2L	7208654	7209050	Peak1342	intron
2L	7209304	7209435	Peak1343	intergenic
2L	7211684	7212322	Peak1344	intron
2L	7212447	7212712	Peak1345	intron
2L	7213509	7214017	Peak1346	intron
2L	7217856	7218634	Peak1347	intron
2L	7218810	7220328	Peak1348	promoter
2L	7220536	7221028	Peak1349	exon
2L	7222932	7223206	Peak1350	promoter
2L	7226701	7227094	Peak1351	exon
2L	7228793	7229038	Peak1352	exon
2L	7241627	7241914	Peak1353	intron
2L	7244888	7245861	Peak1354	promoter
2L	7247367	7247853	Peak1355	intron
2L	7249332	7249844	Peak1356	promoter
2L	7254957	7255179	Peak1357	intergenic
2L	7263803	7264024	Peak1358	intron
2L	7266565	7266857	Peak1359	intron
2L	7276643	7276897	Peak1360	UTR
2L	7276969	7277699	Peak1361	promoter
2L	7281516	7281812	Peak1362	intergenic
2L	7289456	7291086	Peak1363	intergenic
2L	7291147	7291450	Peak1364	intergenic
2L	7291760	7292054	Peak1365	intergenic
2L	7295355	7296013	Peak1366	intergenic
2L	7296194	7297015	Peak1367	intergenic
2L	7298992	7299795	Peak1368	intergenic
2L	7299954	7300393	Peak1369	intergenic
2L	7303157	7303715	Peak1370	intergenic
2L	7304037	7305418	Peak1371	intergenic
2L	7305496	7305975	Peak1372	intergenic
2L	7306130	7306471	Peak1373	intergenic
2L	7306698	7307749	Peak1374	promoter
2L	7309723	7311349	Peak1375	intron
2L	7311514	7311814	Peak1376	intron
2L	7311869	7312708	Peak1377	intron
2L	7312820	7313265	Peak1378	exon
2L	7314287	7314700	Peak1379	exon
2L	7314894	7315405	Peak1380	exon
2L	7315591	7315867	Peak1381	UTR
2L	7316436	7317032	Peak1382	intergenic
2L	7329352	7329579	Peak1383	intergenic
2L	7333768	7334066	Peak1384	UTR
2L	7340082	7340459	Peak1385	intron
2L	7362578	7362780	Peak1386	intergenic
2L	7362936	7363454	Peak1387	intergenic
2L	7386431	7386813	Peak1388	exon
2L	7387812	7388400	Peak1389	promoter
2L	7411497	7411769	Peak1390	exon
2L	7412270	7413009	Peak1391	promoter
2L	7418319	7418834	Peak1392	intron
2L	7419639	7420323	Peak1393	intron
2L	7422385	7422644	Peak1394	UTR
2L	7426512	7426756	Peak1395	intergenic
2L	7426875	7427306	Peak1396	promoter
2L	7466188	7466545	Peak1397	promoter
2L	7470409	7470627	Peak1398	intron
2L	7491282	7491686	Peak1399	intron
2L	7495115	7496620	Peak1400	promoter
2L	7496775	7497699	Peak1401	promoter
2L	7498728	7499701	Peak1402	exon
2L	7499915	7501496	Peak1403	exon
2L	7501954	7502156	Peak1404	intron
2L	7502652	7502700	Peak1405	intergenic
2L	7502853	7503255	Peak1406	intron
2L	7503383	7504250	Peak1407	intron
2L	7504421	7504683	Peak1408	intron
2L	7504759	7505107	Peak1409	intron
2L	7505562	7505981	Peak1410	intron
2L	7507276	7507943	Peak1411	intron
2L	7511224	7511576	Peak1412	intron
2L	7512404	7513747	Peak1413	intron
2L	7513875	7514384	Peak1414	intron
2L	7514891	7515816	Peak1415	intron
2L	7516178	7519108	Peak1416	intron
2L	7519391	7521116	Peak1417	intron
2L	7522316	7522668	Peak1418	intron
2L	7522788	7523426	Peak1419	intron
2L	7523605	7523848	Peak1420	intron
2L	7525661	7527632	Peak1421	intron
2L	7527761	7528564	Peak1422	intron
2L	7529091	7529908	Peak1423	exon
2L	7530123	7531098	Peak1424	promoter
2L	7531937	7533529	Peak1425	intron
2L	7533879	7534636	Peak1426	intron
2L	7534845	7536147	Peak1427	intron
2L	7536228	7536807	Peak1428	exon
2L	7536963	7537203	Peak1429	intron
2L	7538632	7539444	Peak1430	intron
2L	7539643	7540208	Peak1431	intron
2L	7540428	7540744	Peak1432	intron
2L	7541693	7542121	Peak1433	intron
2L	7542774	7543123	Peak1434	intron
2L	7543544	7545158	Peak1435	promoter
2L	7545216	7545896	Peak1436	intron
2L	7569655	7569941	Peak1437	intron
2L	7576347	7576685	Peak1438	promoter
2L	7577122	7577395	Peak1439	intron
2L	7582319	7582680	Peak1440	exon
2L	7585030	7585420	Peak1441	intergenic
2L	7590973	7591256	Peak1442	intergenic
2L	7591650	7591978	Peak1443	intergenic
2L	7592890	7593200	Peak1444	intergenic
2L	7611181	7611638	Peak1445	intron
2L	7624409	7624768	Peak1446	intergenic
2L	7632524	7632853	Peak1447	intergenic
2L	7632997	7633415	Peak1448	intergenic
2L	7635049	7635304	Peak1449	intergenic
2L	7639787	7639988	Peak1450	intergenic
2L	7640565	7640778	Peak1451	intergenic
2L	7640862	7641189	Peak1452	intergenic
2L	7641317	7641910	Peak1453	intergenic
2L	7749767	7750009	Peak1454	intergenic
2L	7781986	7782522	Peak1455	exon
2L	7782737	7783242	Peak1456	promoter
2L	7790306	7790751	Peak1457	promoter
2L	7799447	7800613	Peak1458	promoter
2L	7807373	7807673	Peak1459	intron
2L	7808942	7809165	Peak1460	intron
2L	7811304	7812120	Peak1461	promoter
2L	7821645	7821855	Peak1462	intron
2L	7826574	7827413	Peak1463	promoter
2L	7827562	7829359	Peak1464	promoter
2L	7832813	7833230	Peak1465	UTR
2L	7833885	7834146	Peak1466	intergenic
2L	7855166	7855634	Peak1467	promoter
2L	7876825	7877058	Peak1468	intron
2L	7877225	7877572	Peak1469	intron
2L	7884967	7885756	Peak1470	promoter
2L	7885997	7886345	Peak1471	intron
2L	7887011	7887748	Peak1472	promoter
2L	7887801	7888158	Peak1473	exon
2L	7890717	7891013	Peak1474	intergenic
2L	7915021	7915348	Peak1475	intron
2L	7917836	7918125	Peak1476	intron
2L	7976716	7977015	Peak1477	intron
2L	7984049	7984496	Peak1478	promoter
2L	7991350	7992031	Peak1479	promoter
2L	7993346	7993652	Peak1480	intron
2L	7993940	7995042	Peak1481	promoter
2L	7997375	7997712	Peak1482	promoter
2L	7998670	7999552	Peak1483	promoter
2L	7999897	8000105	Peak1484	exon
2L	8000745	8000955	Peak1485	intron
2L	8001452	8001793	Peak1486	intron
2L	8004138	8004425	Peak1487	promoter
2L	8006780	8007105	Peak1488	exon
2L	8028480	8028978	Peak1489	intron
2L	8029132	8030451	Peak1490	promoter
2L	8030561	8032565	Peak1491	promoter
2L	8033344	8033833	Peak1492	intron
2L	8035078	8035359	Peak1493	intron
2L	8037915	8038317	Peak1494	exon
2L	8038829	8039385	Peak1495	intron
2L	8041074	8041755	Peak1496	promoter
2L	8041936	8043061	Peak1497	promoter
2L	8043219	8044074	Peak1498	promoter
2L	8044326	8044642	Peak1499	exon
2L	8047210	8047519	Peak1500	exon
2L	8071416	8071826	Peak1501	promoter
2L	8072472	8073484	Peak1502	promoter
2L	8080989	8081188	Peak1503	intron
2L	8081500	8084117	Peak1504	promoter
2L	8084225	8085193	Peak1505	intron
2L	8085488	8086056	Peak1506	intron
2L	8086695	8087308	Peak1507	intron
2L	8087583	8087995	Peak1508	intron
2L	8088050	8088743	Peak1509	promoter
2L	8090609	8090839	Peak1510	intron
2L	8090975	8091348	Peak1511	intron
2L	8093005	8093558	Peak1512	intron
2L	8100010	8100292	Peak1513	intron
2L	8100765	8101213	Peak1514	intron
2L	8104029	8104671	Peak1515	intron
2L	8106972	8107459	Peak1516	exon
2L	8116728	8116966	Peak1517	UTR
2L	8120318	8120576	Peak1518	exon
2L	8123722	8124199	Peak1519	promoter
2L	8125313	8125587	Peak1520	exon
2L	8126238	8127208	Peak1521	promoter
2L	8127391	8128011	Peak1522	intron
2L	8131275	8131545	Peak1523	exon
2L	8133287	8133815	Peak1524	exon
2L	8133973	8134306	Peak1525	UTR
2L	8135704	8135975	Peak1526	exon
2L	8141588	8141924	Peak1527	intron
2L	8142596	8142975	Peak1528	intron
2L	8143660	8144770	Peak1529	promoter
2L	8145168	8145979	Peak1530	promoter
2L	8146482	8147244	Peak1531	intron
2L	8147639	8148148	Peak1532	exon
2L	8148467	8149167	Peak1533	promoter
2L	8154197	8154658	Peak1534	exon
2L	8154956	8155269	Peak1535	exon
2L	8156537	8156736	Peak1536	intron
2L	8156811	8157557	Peak1537	exon
2L	8157801	8158616	Peak1538	exon
2L	8161498	8163938	Peak1539	promoter
2L	8165299	8165684	Peak1540	intron
2L	8165896	8166564	Peak1541	intron
2L	8166611	8167000	Peak1542	intron
2L	8167205	8168277	Peak1543	intron
2L	8174167	8174381	Peak1544	exon
2L	8185104	8185434	Peak1545	exon
2L	8197107	8197365	Peak1546	promoter
2L	8199130	8199477	Peak1547	exon
2L	8208742	8211466	Peak1548	promoter
2L	8212489	8213604	Peak1549	promoter
2L	8213771	8214433	Peak1550	promoter
2L	8214740	8215203	Peak1551	exon
2L	8238989	8239247	Peak1552	promoter
2L	8239753	8240290	Peak1553	promoter
2L	8250136	8250494	Peak1554	intron
2L	8254319	8254622	Peak1555	intron
2L	8257102	8257761	Peak1556	promoter
2L	8257882	8258221	Peak1557	intergenic
2L	8259050	8259286	Peak1558	UTR
2L	8260484	8260778	Peak1559	UTR
2L	8266678	8267127	Peak1560	intron
2L	8274418	8274438	Peak1561	intergenic
2L	8274548	8275407	Peak1562	intron
2L	8275765	8276752	Peak1563	intron
2L	8277093	8277286	Peak1564	intron
2L	8277483	8278603	Peak1565	promoter
2L	8279534	8279793	Peak1566	intron
2L	8280043	8280642	Peak1567	intron
2L	8281931	8282168	Peak1568	intron
2L	8287307	8287965	Peak1569	intron
2L	8288052	8288460	Peak1570	intron
2L	8289770	8290323	Peak1571	intron
2L	8290546	8290891	Peak1572	intron
2L	8291056	8291325	Peak1573	intron
2L	8294444	8294733	Peak1574	intron
2L	8295687	8295959	Peak1575	intron
2L	8297024	8297657	Peak1576	promoter
2L	8299533	8299856	Peak1577	intron
2L	8300334	8301223	Peak1578	promoter
2L	8301454	8302353	Peak1579	exon
2L	8302469	8303122	Peak1580	promoter
2L	8303326	8303522	Peak1581	promoter
2L	8303643	8303913	Peak1582	exon
2L	8304228	8304543	Peak1583	exon
2L	8304682	8305272	Peak1584	exon
2L	8305616	8305944	Peak1585	exon
2L	8307612	8308787	Peak1586	promoter
2L	8311373	8312008	Peak1587	promoter
2L	8320210	8320420	Peak1588	promoter
2L	8359269	8359643	Peak1589	exon
2L	8361382	8361685	Peak1590	intron
2L	8361832	8362050	Peak1591	intron
2L	8362366	8363254	Peak1592	promoter
2L	8363828	8365852	Peak1593	promoter
2L	8365939	8366678	Peak1594	promoter
2L	8367102	8367446	Peak1595	exon
2L	8374340	8374805	Peak1596	promoter
2L	8381448	8384277	Peak1597	promoter
2L	8384335	8385246	Peak1598	promoter
2L	8385756	8387553	Peak1599	promoter
2L	8387639	8387921	Peak1600	exon
2L	8387977	8388176	Peak1601	exon
2L	8389046	8389253	Peak1602	exon
2L	8389645	8389900	Peak1603	UTR
2L	8390035	8390300	Peak1604	exon
2L	8402133	8403219	Peak1605	promoter
2L	8403322	8404166	Peak1606	promoter
2L	8406580	8406746	Peak1607	exon
2L	8414307	8415294	Peak1608	promoter
2L	8415527	8417323	Peak1609	promoter
2L	8417563	8418693	Peak1610	intron
2L	8419086	8420532	Peak1611	promoter
2L	8421009	8421682	Peak1612	intron
2L	8422039	8422580	Peak1613	intron
2L	8422984	8424167	Peak1614	intron
2L	8424687	8425367	Peak1615	intron
2L	8427764	8428047	Peak1616	exon
2L	8431596	8431993	Peak1617	exon
2L	8434847	8435132	Peak1618	exon
2L	8436041	8436617	Peak1619	exon
2L	8436767	8437973	Peak1620	promoter
2L	8449329	8449666	Peak1621	promoter
2L	8463331	8463862	Peak1622	intron
2L	8464329	8464645	Peak1623	promoter
2L	8466625	8467220	Peak1624	promoter
2L	8477626	8477819	Peak1625	exon
2L	8478035	8479844	Peak1626	promoter
2L	8480242	8480496	Peak1627	intron
2L	8481618	8482381	Peak1628	promoter
2L	8485385	8486274	Peak1629	exon
2L	8488842	8489084	Peak1630	promoter
2L	8509389	8510201	Peak1631	exon
2L	8510307	8512666	Peak1632	promoter
2L	8514744	8515489	Peak1633	promoter
2L	8517064	8517838	Peak1634	promoter
2L	8521227	8523031	Peak1635	promoter
2L	8528004	8529174	Peak1636	promoter
2L	8529448	8529910	Peak1637	intron
2L	8536261	8536479	Peak1638	intron
2L	8540767	8541333	Peak1639	exon
2L	8541397	8542554	Peak1640	promoter
2L	8542681	8542933	Peak1641	intron
2L	8543147	8543467	Peak1642	promoter
2L	8543626	8544376	Peak1643	intron
2L	8544593	8545067	Peak1644	UTR
2L	8545363	8545965	Peak1645	intron
2L	8576560	8576914	Peak1646	intron
2L	8578475	8578853	Peak1647	intron
2L	8587905	8588535	Peak1648	intron
2L	8675445	8675925	Peak1649	exon
2L	8679029	8679238	Peak1650	intron
2L	8683179	8684420	Peak1651	promoter
2L	8685258	8686378	Peak1652	promoter
2L	8739974	8741313	Peak1653	promoter
2L	8741777	8741957	Peak1654	intergenic
2L	8788402	8788608	Peak1655	intergenic
2L	8789113	8789629	Peak1656	intergenic
2L	8807993	8808313	Peak1657	intergenic
2L	8809057	8809338	Peak1658	intergenic
2L	8809530	8810797	Peak1659	intergenic
2L	8811163	8811935	Peak1660	intergenic
2L	8818071	8818499	Peak1661	intergenic
2L	8822101	8822630	Peak1662	intergenic
2L	8823243	8823589	Peak1663	intergenic
2L	8824711	8826088	Peak1664	promoter
2L	8826377	8829171	Peak1665	exon
2L	8830064	8830378	Peak1666	intergenic
2L	8831929	8833359	Peak1667	intergenic
2L	8838430	8838714	Peak1668	intergenic
2L	8838914	8839246	Peak1669	intergenic
2L	8841278	8842784	Peak1670	intergenic
2L	8843581	8844131	Peak1671	intergenic
2L	8844662	8845023	Peak1672	intergenic
2L	8845772	8846511	Peak1673	intergenic
2L	8846585	8847653	Peak1674	intergenic
2L	8849049	8850047	Peak1675	intergenic
2L	8851927	8852610	Peak1676	intergenic
2L	8865882	8866314	Peak1677	exon
2L	8870118	8870459	Peak1678	intergenic
2L	8871365	8871867	Peak1679	intergenic
2L	8872228	8872981	Peak1680	intergenic
2L	8875653	8876540	Peak1681	intergenic
2L	8888380	8889211	Peak1682	intergenic
2L	8898556	8898799	Peak1683	intergenic
2L	8936516	8936835	Peak1684	intergenic
2L	8943165	8943459	Peak1685	promoter
2L	8949793	8950332	Peak1686	intron
2L	8950540	8950872	Peak1687	intron
2L	8957983	8958255	Peak1688	promoter
2L	8984620	8985119	Peak1689	promoter
2L	8997269	8997711	Peak1690	promoter
2L	9019412	9019757	Peak1691	intergenic
2L	9071320	9071509	Peak1692	intergenic
2L	9088239	9088434	Peak1693	exon
2L	9114293	9114515	Peak1694	intergenic
2L	9120407	9120740	Peak1695	intergenic
2L	9120939	9121386	Peak1696	intergenic
2L	9124383	9124736	Peak1697	intergenic
2L	9125534	9126524	Peak1698	promoter
2L	9126940	9127453	Peak1699	exon
2L	9128177	9129219	Peak1700	intron
2L	9129313	9129899	Peak1701	intron
2L	9137763	9138622	Peak1702	intron
2L	9139337	9139676	Peak1703	intron
2L	9140835	9141130	Peak1704	intron
2L	9141481	9141950	Peak1705	intron
2L	9144797	9145390	Peak1706	intron
2L	9145538	9147053	Peak1707	intron
2L	9147345	9147959	Peak1708	intron
2L	9148168	9148431	Peak1709	intron
2L	9148804	9149445	Peak1710	intron
2L	9149605	9150584	Peak1711	intron
2L	9150745	9151364	Peak1712	promoter
2L	9152231	9152430	Peak1713	intron
2L	9154292	9154801	Peak1714	exon
2L	9156318	9156639	Peak1715	intron
2L	9156746	9157049	Peak1716	intron
2L	9158068	9158720	Peak1717	intron
2L	9159124	9159331	Peak1718	intron
2L	9160921	9162774	Peak1719	exon
2L	9163222	9163488	Peak1720	exon
2L	9164097	9164895	Peak1721	promoter
2L	9165680	9167475	Peak1722	promoter
2L	9176085	9176993	Peak1723	promoter
2L	9178241	9178437	Peak1724	intron
2L	9179249	9179664	Peak1725	intron
2L	9186639	9186920	Peak1726	intron
2L	9203527	9203743	Peak1727	intron
2L	9205231	9205553	Peak1728	intron
2L	9226187	9226742	Peak1729	intron
2L	9233929	9234293	Peak1730	exon
2L	9236451	9236765	Peak1731	intron
2L	9251904	9252481	Peak1732	exon
2L	9252560	9253276	Peak1733	promoter
2L	9256453	9256683	Peak1734	promoter
2L	9330572	9331569	Peak1735	promoter
2L	9416138	9416702	Peak1736	promoter
2L	9420665	9420947	Peak1737	exon
2L	9421268	9421856	Peak1738	intron
2L	9430922	9431179	Peak1739	promoter
2L	9431298	9432053	Peak1740	promoter
2L	9432641	9433111	Peak1741	exon
2L	9437218	9437659	Peak1742	promoter
2L	9442644	9442871	Peak1743	intron
2L	9448085	9450260	Peak1744	promoter
2L	9451767	9452240	Peak1745	intron
2L	9452911	9453480	Peak1746	intron
2L	9454058	9455042	Peak1747	intron
2L	9455109	9455633	Peak1748	intron
2L	9458868	9459089	Peak1749	intron
2L	9459849	9460800	Peak1750	exon
2L	9460928	9462373	Peak1751	exon
2L	9464355	9464910	Peak1752	intergenic
2L	9493786	9494990	Peak1753	promoter
2L	9495287	9495838	Peak1754	promoter
2L	9495902	9496166	Peak1755	intron
2L	9496323	9496774	Peak1756	intron
2L	9497186	9497609	Peak1757	intron
2L	9508382	9509118	Peak1758	intron
2L	9520800	9521007	Peak1759	intergenic
2L	9521064	9521856	Peak1760	promoter
2L	9522212	9522479	Peak1761	intron
2L	9522724	9523157	Peak1762	intron
2L	9567610	9568003	Peak1763	intergenic
2L	9568061	9569509	Peak1764	promoter
2L	9569685	9570036	Peak1765	intron
2L	9570151	9571000	Peak1766	promoter
2L	9576173	9576523	Peak1767	intron
2L	9576580	9576983	Peak1768	promoter
2L	9577122	9577545	Peak1769	intergenic
2L	9581407	9582115	Peak1770	promoter
2L	9582875	9583701	Peak1771	intergenic
2L	9584141	9584661	Peak1772	intergenic
2L	9585124	9585651	Peak1773	intergenic
2L	9587154	9587546	Peak1774	intergenic
2L	9601121	9601688	Peak1775	intergenic
2L	9601956	9602520	Peak1776	intergenic
2L	9608064	9608694	Peak1777	promoter
2L	9609646	9610018	Peak1778	intron
2L	9612352	9612467	Peak1779	exon
2L	9613175	9614097	Peak1780	promoter
2L	9616667	9617287	Peak1781	promoter
2L	9686070	9686459	Peak1782	intron
2L	9697553	9697936	Peak1783	UTR
2L	9698442	9699511	Peak1784	promoter
2L	9699611	9701330	Peak1785	promoter
2L	9705056	9706343	Peak1786	promoter
2L	9709072	9709388	Peak1787	exon
2L	9710688	9711376	Peak1788	promoter
2L	9712328	9712527	Peak1789	UTR
2L	9715069	9715830	Peak1790	UTR
2L	9731181	9731707	Peak1791	intron
2L	9757322	9757668	Peak1792	intergenic
2L	9757938	9759252	Peak1793	promoter
2L	9763416	9763870	Peak1794	promoter
2L	9782221	9782507	Peak1795	promoter
2L	9790496	9791177	Peak1796	promoter
2L	9792983	9793284	Peak1797	promoter
2L	9887870	9888484	Peak1798	promoter
2L	9890473	9891335	Peak1799	promoter
2L	9892851	9893661	Peak1800	promoter
2L	9894263	9896120	Peak1801	promoter
2L	9896248	9897657	Peak1802	promoter
2L	9897973	9898497	Peak1803	exon
2L	9906561	9906800	Peak1804	intron
2L	9906879	9908029	Peak1805	intron
2L	9911915	9913258	Peak1806	promoter
2L	9917629	9917742	Peak1807	exon
2L	9917934	9918354	Peak1808	promoter
2L	9919488	9919690	Peak1809	exon
2L	9936511	9936698	Peak1810	intron
2L	9937747	9939201	Peak1811	promoter
2L	9945967	9946347	Peak1812	intron
2L	9947291	9947651	Peak1813	promoter
2L	9953842	9954531	Peak1814	promoter
2L	9956715	9957742	Peak1815	promoter
2L	9962641	9963027	Peak1816	exon
2L	9963481	9963844	Peak1817	promoter
2L	9966659	9968625	Peak1818	promoter
2L	9969183	9970062	Peak1819	intergenic
2L	9970407	9970827	Peak1820	intergenic
2L	9980865	9981058	Peak1821	intergenic
2L	9981343	9981754	Peak1822	intergenic
2L	9982793	9985216	Peak1823	promoter
2L	9985858	9995137	Peak1824	exon
2L	9995178	9996698	Peak1825	promoter
2L	9996819	9997505	Peak1826	exon
2L	10002407	10002623	Peak1827	intron
2L	10003650	10005029	Peak1828	promoter
2L	10005547	10005738	Peak1829	exon
2L	10005884	10005928	Peak1830	intergenic
2L	10006023	10006227	Peak1831	exon
2L	10006924	10007277	Peak1832	exon
2L	10007577	10007769	Peak1833	exon
2L	10008004	10008208	Peak1834	UTR
2L	10008278	10008745	Peak1835	UTR
2L	10009268	10009683	Peak1836	promoter
2L	10009882	10010417	Peak1837	promoter
2L	10056541	10057563	Peak1838	promoter
2L	10057638	10059986	Peak1839	exon
2L	10180152	10180685	Peak1840	promoter
2L	10199010	10199277	Peak1841	promoter
2L	10199766	10200583	Peak1842	exon
2L	10200689	10201754	Peak1843	promoter
2L	10203428	10203645	Peak1844	exon
2L	10203964	10204418	Peak1845	promoter
2L	10206120	10206280	Peak1846	exon
2L	10206623	10207062	Peak1847	promoter
2L	10208599	10208820	Peak1848	exon
2L	10208898	10209259	Peak1849	intron
2L	10215072	10215409	Peak1850	exon
2L	10217340	10217736	Peak1851	exon
2L	10219952	10222479	Peak1852	promoter
2L	10223157	10223474	Peak1853	exon
2L	10224787	10225800	Peak1854	exon
2L	10226186	10226981	Peak1855	promoter
2L	10227157	10227586	Peak1856	intergenic
2L	10230123	10231813	Peak1857	promoter
2L	10232075	10232279	Peak1858	intergenic
2L	10232381	10232705	Peak1859	promoter
2L	10235927	10236319	Peak1860	exon
2L	10237871	10238278	Peak1861	UTR
2L	10239202	10239540	Peak1862	promoter
2L	10239844	10240099	Peak1863	promoter
2L	10241319	10241756	Peak1864	exon
2L	10242615	10243078	Peak1865	exon
2L	10246359	10247251	Peak1866	promoter
2L	10249190	10250219	Peak1867	promoter
2L	10250356	10250936	Peak1868	promoter
2L	10251030	10251263	Peak1869	exon
2L	10255749	10256057	Peak1870	promoter
2L	10258535	10258944	Peak1871	exon
2L	10259856	10260391	Peak1872	promoter
2L	10260522	10261227	Peak1873	promoter
2L	10262781	10263750	Peak1874	promoter
2L	10264050	10264470	Peak1875	promoter
2L	10265198	10265465	Peak1876	promoter
2L	10269843	10270179	Peak1877	promoter
2L	10272003	10272293	Peak1878	exon
2L	10276638	10277269	Peak1879	promoter
2L	10277432	10277763	Peak1880	promoter
2L	10278261	10278396	Peak1881	exon
2L	10291403	10291828	Peak1882	intron
2L	10291951	10292515	Peak1883	promoter
2L	10295325	10295726	Peak1884	promoter
2L	10295947	10296143	Peak1885	exon
2L	10298287	10298714	Peak1886	intron
2L	10299287	10299546	Peak1887	intron
2L	10306780	10307042	Peak1888	promoter
2L	10311692	10312234	Peak1889	promoter
2L	10314020	10314533	Peak1890	promoter
2L	10315639	10315913	Peak1891	exon
2L	10332671	10333024	Peak1892	exon
2L	10333518	10335386	Peak1893	promoter
2L	10336658	10336947	Peak1894	exon
2L	10337382	10337612	Peak1895	exon
2L	10339269	10339887	Peak1896	promoter
2L	10341464	10341992	Peak1897	promoter
2L	10342552	10343114	Peak1898	promoter
2L	10343954	10344565	Peak1899	promoter
2L	10344627	10344829	Peak1900	UTR
2L	10353650	10354289	Peak1901	promoter
2L	10355523	10355730	Peak1902	exon
2L	10356567	10357304	Peak1903	promoter
2L	10362575	10362822	Peak1904	promoter
2L	10362876	10363092	Peak1905	promoter
2L	10363440	10363721	Peak1906	exon
2L	10364287	10364968	Peak1907	promoter
2L	10365407	10365679	Peak1908	exon
2L	10366541	10367698	Peak1909	promoter
2L	10375066	10375273	Peak1910	exon
2L	10375381	10375916	Peak1911	promoter
2L	10376061	10377297	Peak1912	promoter
2L	10379939	10380634	Peak1913	promoter
2L	10384932	10385598	Peak1914	exon
2L	10385696	10386391	Peak1915	promoter
2L	10386485	10387576	Peak1916	promoter
2L	10387908	10389022	Peak1917	promoter
2L	10390037	10391613	Peak1918	exon
2L	10391679	10392301	Peak1919	exon
2L	10396021	10396379	Peak1920	promoter
2L	10396620	10397881	Peak1921	promoter
2L	10397985	10398814	Peak1922	promoter
2L	10399969	10400184	Peak1923	exon
2L	10401972	10402368	Peak1924	exon
2L	10402519	10402760	Peak1925	exon
2L	10402921	10403675	Peak1926	exon
2L	10403916	10404400	Peak1927	promoter
2L	10408122	10408526	Peak1928	promoter
2L	10408605	10409602	Peak1929	exon
2L	10409671	10410427	Peak1930	exon
2L	10410570	10411537	Peak1931	exon
2L	10412932	10413592	Peak1932	promoter
2L	10413716	10414359	Peak1933	promoter
2L	10419035	10419801	Peak1934	promoter
2L	10422357	10422953	Peak1935	promoter
2L	10423180	10424139	Peak1936	promoter
2L	10424933	10425391	Peak1937	exon
2L	10425590	10426013	Peak1938	exon
2L	10426484	10426693	Peak1939	promoter
2L	10426769	10427443	Peak1940	promoter
2L	10428702	10428921	Peak1941	promoter
2L	10428985	10429235	Peak1942	exon
2L	10430553	10431071	Peak1943	promoter
2L	10431257	10431685	Peak1944	promoter
2L	10439248	10439525	Peak1945	promoter
2L	10439999	10440350	Peak1946	exon
2L	10455849	10456121	Peak1947	promoter
2L	10457157	10458185	Peak1948	promoter
2L	10475734	10476050	Peak1949	intergenic
2L	10479176	10479451	Peak1950	intron
2L	10479873	10480094	Peak1951	intron
2L	10482529	10482770	Peak1952	exon
2L	10483055	10483826	Peak1953	promoter
2L	10484435	10484636	Peak1954	exon
2L	10486554	10486974	Peak1955	exon
2L	10488234	10488755	Peak1956	promoter
2L	10505938	10506510	Peak1957	intron
2L	10506561	10507432	Peak1958	promoter
2L	10516574	10516804	Peak1959	promoter
2L	10517208	10517567	Peak1960	promoter
2L	10544546	10545010	Peak1961	promoter
2L	10545298	10545649	Peak1962	exon
2L	10545865	10546249	Peak1963	exon
2L	10546712	10546912	Peak1964	intron
2L	10547230	10547794	Peak1965	intron
2L	10547941	10548512	Peak1966	intron
2L	10548641	10549513	Peak1967	intron
2L	10565098	10565243	Peak1968	intron
2L	10569654	10570376	Peak1969	intron
2L	10574035	10574424	Peak1970	intron
2L	10586126	10586422	Peak1971	intron
2L	10606209	10606469	Peak1972	intron
2L	10608329	10609355	Peak1973	intron
2L	10609640	10610711	Peak1974	intron
2L	10611379	10611945	Peak1975	intron
2L	10613210	10613443	Peak1976	intron
2L	10616307	10616502	Peak1977	intron
2L	10646790	10647053	Peak1978	exon
2L	10647600	10648199	Peak1979	exon
2L	10654587	10654901	Peak1980	intergenic
2L	10661927	10662213	Peak1981	promoter
2L	10663638	10664053	Peak1982	intron
2L	10689179	10689378	Peak1983	promoter
2L	10725260	10725538	Peak1984	promoter
2L	10728533	10728734	Peak1985	UTR
2L	10728834	10729104	Peak1986	promoter
2L	10732299	10732390	Peak1987	UTR
2L	10732602	10733203	Peak1988	promoter
2L	10735815	10736206	Peak1989	promoter
2L	10737199	10737751	Peak1990	promoter
2L	10743604	10744032	Peak1991	promoter
2L	10756157	10756488	Peak1992	promoter
2L	10767453	10768159	Peak1993	promoter
2L	10769815	10770100	Peak1994	promoter
2L	10839570	10840637	Peak1995	exon
2L	10840732	10841474	Peak1996	exon
2L	10841786	10842796	Peak1997	promoter
2L	10849484	10849712	Peak1998	intron
2L	10850202	10850569	Peak1999	promoter
[truncated: 19,415 more rows]

## Sheet: README
List of 21 414 intervals from the union of ATAC-seq peaks.
chr	Genomic coordinates: chromosome name
start	Genomic coordinates: start position
end	Genomic coordinates: end position
ID	Peak ID
annotation	Genomic annotation (as in Fig. 4A)
