# Supplementary material for: ATAC-seq reveals regional differences in enhancer accessibility during the establishment of spatial coordinates in the Drosophila blastoderm
Source: HighWire-hosted journal article supplement (doi:10.1101/gr.242362.118), 2019-04-08
Supplement: Supplemental_Table_S6.xlsx [file Supplemental_Table_S6.xlsx]

## Sheet: Data
peakID	chr	start	end	Annotation	maxLog2	D1control	D2control	D3control	D4control	D5control	D6control	D7control	D1D2	D1D3	D1D4	D1D5	D1D6	D1D7	D2D3	D2D4	D2D5	D2D6	D2D7	D3D4	D3D5	D3D6	D3D7	D4D5	D4D6	D4D7	D5D6	D5D7	D6D7
Peak1	2L	5553	5792	intergenic	0.744774	1	1	1	1	0	0	0	0	0	0	1	0	0	0	0	0	0	0	0	1	0	0	1	0	0	0	0	0
Peak22	2L	43991	44486	intron	0.750931	1	1	1	1	1	1	1	0	0	1	1	1	1	0	1	1	1	1	1	1	1	1	0	0	0	0	0	0
Peak25	2L	54999	55424	intron	1.09243	1	0	0	1	1	1	0	0	0	1	1	1	1	0	1	1	1	1	1	1	1	1	0	0	0	0	0	0
Peak36	2L	81990	82339	intergenic	0.630812	1	0	1	0	1	0	0	0	0	0	1	0	0	1	0	0	0	0	1	1	1	0	0	0	0	0	0	0
Peak57	2L	124262	124982	CDS	0.408231	1	0	0	0	1	1	0	0	0	1	1	1	0	0	0	0	1	0	1	1	0	0	0	0	0	0	0	0
Peak69	2L	165179	167186	intron	0.316362	1	1	1	0	1	1	1	0	0	1	1	1	1	0	1	1	1	1	1	1	1	1	0	0	0	0	0	0
Peak98	2L	198120	199846	CDS	0.476093	1	0	0	0	1	0	0	0	0	0	0	0	0	0	0	0	0	0	0	0	0	0	0	0	0	0	0	0
Peak130	2L	243276	243963	intron	0.429697	1	0	0	1	1	0	0	0	0	1	0	1	0	0	1	0	1	0	1	0	0	0	0	0	0	0	0	0
Peak152	2L	286160	287143	promoter	0.445079	1	0	0	0	0	1	0	0	1	1	1	1	1	0	1	0	1	1	0	0	0	0	0	0	0	0	0	0
Peak164	2L	355847	358143	promoter	0.326998	1	1	1	1	1	1	1	0	0	1	1	1	1	0	1	1	1	1	1	1	1	1	0	0	0	0	0	0
Peak166	2L	376571	376985	intergenic	0.828053	1	0	1	0	1	0	0	0	0	1	1	1	1	0	1	1	0	1	1	1	0	1	0	0	0	0	0	0
Peak174	2L	422707	423047	intergenic	0.845257	1	1	1	0	0	0	0	0	0	0	0	0	0	0	0	0	0	0	0	0	0	0	0	0	0	0	0	0
Peak183	2L	479746	479979	intron	0.776607	1	0	1	0	0	0	0	0	0	0	0	0	0	0	0	0	0	0	0	1	0	0	0	0	0	0	0	0
Peak184	2L	480707	481509	intron	0.345333	1	0	1	1	0	1	0	0	0	0	0	0	0	1	1	0	1	0	0	1	0	0	1	0	0	0	0	0
Peak187	2L	510533	511040	intron	0.950033	1	1	0	0	0	0	0	0	0	0	0	0	0	0	1	0	0	1	0	0	0	0	0	0	0	0	0	0
Peak195	2L	531209	531906	intron	0.644362	1	0	1	1	1	0	0	0	0	1	1	0	0	0	1	1	0	0	1	1	0	1	0	1	0	1	1	0
Peak210	2L	590012	590354	intron	0.763844	1	0	1	0	1	0	0	0	0	1	1	0	0	0	1	0	0	0	1	1	1	1	0	0	0	0	0	0
Peak213	2L	599328	599828	intergenic	1.23326	1	0	0	1	0	1	0	0	0	0	0	0	0	0	0	0	0	0	0	0	0	0	0	0	0	0	0	0
Peak214	2L	600396	601028	intergenic	1.70235	1	0	1	0	0	0	0	0	0	0	1	0	1	0	0	0	0	0	1	1	0	1	0	0	0	0	0	0
Peak215	2L	601425	602262	intergenic	1.20001	1	0	1	1	1	0	0	0	0	0	0	0	0	0	0	0	0	0	0	0	0	0	0	0	0	0	0	0
Peak221	2L	619680	619939	intergenic	1.06021	1	0	1	1	1	1	0	0	0	0	0	0	0	0	0	0	0	0	0	0	0	0	0	0	0	0	0	0
Peak222	2L	638908	639116	intergenic	0.801805	1	1	1	0	0	0	0	0	0	0	0	0	1	0	0	1	0	1	0	1	0	1	0	0	1	0	0	0
Peak225	2L	667471	668046	intron	0.754241	1	1	1	0	0	0	0	0	0	0	1	0	1	0	0	1	0	1	0	0	0	0	0	0	0	0	0	0
Peak226	2L	668911	669197	intron	0.549863	1	0	1	0	1	0	0	1	0	1	1	0	1	1	0	1	0	0	1	1	1	1	0	0	0	0	0	0
Peak230	2L	701656	702443	intron	0.564816	1	0	1	1	1	0	0	1	0	1	1	1	1	1	1	1	0	0	1	1	1	1	0	0	1	0	1	0
Peak231	2L	704852	705114	intron	0.777733	1	1	0	0	0	0	0	1	0	1	1	0	0	1	1	0	0	1	0	1	0	0	0	0	0	0	1	0
Peak232	2L	708172	708676	intron	0.475584	1	1	1	1	0	0	0	0	0	0	0	0	0	0	0	1	0	0	0	1	0	0	1	0	0	0	0	0
Peak233	2L	712753	713109	intron	1.11087	1	0	1	1	0	1	0	0	0	0	0	0	0	0	1	0	0	0	0	0	0	0	1	0	0	0	0	0
Peak234	2L	713252	713893	intron	0.723358	1	0	1	1	1	1	0	1	0	1	1	1	1	0	1	1	1	0	1	1	1	1	0	0	0	0	0	0
Peak235	2L	714228	714537	UTR	0.769887	1	0	1	1	1	1	0	0	0	1	1	1	0	0	1	1	1	0	1	1	1	1	0	0	1	0	1	1
Peak247	2L	831360	832134	CDS	0.326717	1	0	1	1	1	1	0	0	0	0	0	0	0	0	0	0	0	0	0	0	0	0	0	0	1	0	0	0
Peak252	2L	836664	836894	CDS	0.490894	1	0	1	0	0	0	0	0	0	0	1	0	1	0	0	0	0	1	0	0	0	1	0	0	1	0	0	0
Peak277	2L	1007260	1008368	intergenic	1.07018	1	0	1	0	0	0	0	1	0	0	1	0	1	1	1	0	0	0	0	1	0	0	0	0	0	0	0	0
Peak283	2L	1055034	1055468	intron	0.500579	1	1	0	0	0	0	0	0	0	0	0	0	1	0	0	0	0	1	0	0	0	0	0	0	0	0	0	0
Peak284	2L	1056400	1056765	intron	0.456321	1	1	1	0	0	0	0	0	0	1	1	0	1	0	1	1	0	1	0	1	0	1	0	0	0	0	0	0
Peak291	2L	1067585	1069175	intron	0.773468	1	0	1	1	0	0	1	1	0	0	0	0	0	1	1	0	0	1	0	0	0	0	0	0	0	0	0	0
Peak292	2L	1069361	1069609	intron	0.484821	1	0	1	0	0	0	0	0	0	0	0	0	0	0	0	0	0	0	0	1	0	0	0	0	0	0	0	0
Peak295	2L	1075496	1076255	intron	0.472076	1	0	1	0	1	0	0	0	0	1	1	0	0	0	1	1	0	0	1	1	0	1	0	0	0	0	0	0
Peak309	2L	1156207	1156784	promoter	0.303816	1	1	1	0	0	0	0	0	0	1	1	1	1	0	1	1	1	1	1	1	1	1	0	0	0	0	0	0
Peak316	2L	1263977	1264276	intron	1.20569	1	0	1	1	0	0	0	0	0	0	0	0	0	1	1	0	1	1	0	0	0	0	0	0	0	0	0	0
Peak337	2L	1404645	1406564	intron	0.491204	1	0	0	0	0	0	0	0	0	0	0	0	0	0	0	0	0	0	0	0	0	0	0	0	0	0	0	0
Peak349	2L	1430458	1430998	intergenic	0.706793	1	1	0	0	0	0	0	0	0	1	0	0	1	0	1	1	1	1	0	0	0	1	0	0	0	0	0	0
Peak350	2L	1439691	1440067	intergenic	0.926229	1	0	0	1	0	0	0	0	0	0	0	0	0	0	0	0	0	0	0	0	0	0	0	0	0	0	0	0
Peak351	2L	1450009	1450218	intergenic	0.96686	1	1	1	1	1	1	0	0	0	0	0	0	0	0	0	0	0	0	0	0	0	0	0	0	0	0	0	0
Peak352	2L	1457087	1457428	intergenic	0.643072	1	0	1	0	1	0	0	1	0	1	1	1	1	1	0	0	0	0	1	1	0	1	0	0	0	0	0	0
Peak355	2L	1461816	1462806	intergenic	0.727175	1	0	1	0	0	0	0	0	0	0	0	0	0	0	0	1	0	0	0	1	0	0	0	0	0	0	0	0
Peak357	2L	1464495	1464828	intergenic	0.785504	1	0	0	0	0	0	0	1	0	1	1	0	1	0	0	0	0	0	0	0	0	0	0	0	0	0	0	0
Peak358	2L	1473139	1473396	intergenic	0.833465	1	0	1	0	0	0	0	0	0	0	0	0	0	0	1	1	0	0	1	1	0	1	0	0	0	0	0	0
Peak362	2L	1485866	1486466	intergenic	0.685699	1	0	1	0	0	0	0	0	0	0	0	0	0	0	0	0	0	0	0	1	0	1	0	0	0	0	0	0
Peak366	2L	1508175	1508539	intergenic	1.81374	1	0	0	0	1	0	1	0	0	0	0	0	0	0	0	0	0	0	0	0	1	0	0	1	0	0	0	1
Peak367	2L	1510935	1511141	intergenic	0.928824	1	0	1	0	1	0	0	1	0	1	1	1	1	0	0	1	0	0	1	1	0	1	0	0	0	0	0	0
Peak368	2L	1516965	1518537	promoter	0.563127	1	0	1	1	1	1	1	1	0	1	1	1	1	0	1	1	1	1	1	1	1	1	0	0	0	0	0	0
Peak369	2L	1525030	1525593	intergenic	1.16944	1	0	0	0	0	0	0	0	0	0	1	0	0	0	0	0	0	0	0	1	0	0	0	0	0	0	0	0
Peak376	2L	1669676	1669965	intron	0.678919	1	0	1	0	1	0	0	0	0	1	1	0	0	0	1	1	0	0	1	1	0	1	0	0	1	0	1	0
Peak392	2L	1886295	1887257	intron	0.424952	1	0	1	0	0	0	0	0	0	1	1	1	1	0	1	1	0	1	1	1	1	1	0	0	0	0	0	0
Peak393	2L	1909751	1910177	UTR	0.726546	1	0	1	1	1	1	0	0	0	0	0	0	0	0	1	0	0	0	0	0	0	0	1	0	1	0	0	0
Peak396	2L	1957341	1957825	intron	1.21717	1	0	1	1	0	1	0	0	0	0	0	0	0	0	1	0	1	0	0	0	0	0	1	0	0	0	0	0
Peak397	2L	1957996	1958741	intron	1.36273	1	1	1	0	0	0	0	0	0	0	0	0	0	0	0	0	0	1	0	0	0	1	0	0	0	0	0	0
Peak398	2L	1960943	1961281	intron	1.34256	1	0	1	1	1	1	0	0	0	0	0	0	0	0	0	0	0	0	0	0	0	1	0	0	1	0	1	0
Peak399	2L	1962124	1962417	intron	1.01332	1	0	1	0	0	0	0	0	0	0	0	0	0	0	0	0	0	0	0	0	0	0	0	0	0	0	0	0
Peak409	2L	2031522	2031814	intergenic	0.44939	1	0	0	0	0	0	0	0	0	0	0	0	0	0	0	0	0	0	0	0	0	0	0	0	0	0	0	0
Peak412	2L	2045083	2045633	promoter	0.398858	1	0	1	0	0	0	0	0	0	1	1	0	0	0	0	0	0	0	1	1	0	0	0	0	0	0	0	0
Peak413	2L	2094449	2094670	CDS	1.05384	1	0	0	0	0	0	0	0	0	0	0	0	0	0	0	0	0	0	0	0	0	0	0	0	0	0	0	0
Peak418	2L	2154791	2155042	CDS	0.535545	1	0	1	0	0	0	0	0	0	0	1	0	0	0	0	0	0	0	0	1	0	0	1	0	0	0	0	0
Peak419	2L	2155489	2156385	promoter	0.663182	1	1	1	0	0	1	0	0	0	0	0	0	0	0	0	1	0	1	0	0	0	0	0	0	0	0	0	0
Peak420	2L	2157942	2158570	CDS	0.408174	1	0	1	0	0	0	0	0	0	0	0	0	1	0	0	0	0	1	0	0	0	1	0	0	1	0	0	0
Peak421	2L	2158633	2160592	CDS	0.408148	1	1	1	1	0	0	0	0	0	0	0	0	0	0	0	0	0	0	0	0	0	0	0	0	0	0	0	0
Peak424	2L	2166405	2167066	intron	0.619581	1	0	1	0	0	0	0	0	0	0	1	0	0	0	0	0	0	0	0	1	0	0	0	0	0	0	1	0
Peak427	2L	2171903	2173319	intron	0.359986	1	1	1	1	1	0	0	0	0	1	1	0	1	0	1	1	1	1	1	1	1	1	0	0	0	0	1	0
Peak429	2L	2175368	2175842	intron	0.662391	1	0	1	0	1	0	0	0	0	1	1	0	1	0	1	1	0	1	1	1	0	1	0	0	0	0	0	0
Peak432	2L	2181406	2182536	intergenic	0.707476	1	0	1	0	0	0	0	0	0	0	1	0	0	1	0	0	0	0	1	1	0	1	0	0	0	0	0	0
Peak433	2L	2182937	2183755	intergenic	0.687542	1	0	0	0	0	0	0	0	0	0	0	0	0	0	0	0	0	0	0	0	0	0	0	0	0	0	0	0
Peak439	2L	2196430	2197431	intron	0.535388	1	0	0	1	1	0	0	0	0	0	0	0	0	0	1	0	0	0	0	0	0	0	0	0	0	0	0	0
Peak446	2L	2217144	2217670	promoter	0.309013	1	0	0	0	1	0	1	0	0	0	0	0	0	0	1	0	1	1	0	0	0	0	0	0	0	0	0	0
Peak450	2L	2293237	2293460	intergenic	0.55347	1	0	1	0	0	0	0	0	0	1	1	0	1	0	1	1	0	1	1	1	0	1	0	0	0	0	0	0
Peak456	2L	2370287	2370824	CDS	1.22213	1	1	1	0	1	0	0	0	0	1	1	1	0	0	1	1	1	1	1	1	1	1	0	0	0	0	1	0
Peak462	2L	2447989	2448731	intron	0.949502	1	0	0	0	1	1	0	0	0	0	1	0	1	0	1	1	1	0	0	1	0	1	0	0	1	0	1	1
Peak463	2L	2449511	2450302	promoter	0.994687	1	1	1	1	1	1	1	0	0	1	1	1	1	0	1	1	1	1	1	1	1	1	0	0	0	0	0	0
Peak466	2L	2453407	2453815	intron	0.416865	1	0	0	0	0	0	0	0	0	0	1	0	0	0	0	0	0	0	0	0	0	0	0	0	0	0	1	0
Peak467	2L	2454281	2455348	promoter	0.412902	1	1	0	0	0	0	0	0	0	0	0	0	0	0	0	0	0	0	0	0	0	0	0	0	0	0	0	0
Peak473	2L	2460972	2461154	intergenic	0.895518	1	0	1	0	0	0	0	0	0	0	0	0	0	0	0	0	0	0	0	1	0	0	0	0	0	0	0	0
Peak474	2L	2461345	2461784	intergenic	0.904939	1	0	1	0	0	0	0	1	0	1	1	0	1	1	0	0	0	0	0	1	0	0	0	0	0	0	0	0
Peak475	2L	2461998	2462774	intergenic	0.365557	1	0	1	1	1	1	1	0	0	1	1	1	1	0	1	1	1	1	1	1	1	1	0	0	0	0	0	0
Peak501	2L	2814665	2815402	CDS	0.657884	1	0	1	0	0	0	0	0	0	0	0	0	1	0	0	0	0	1	0	0	0	1	0	0	1	0	1	0
Peak507	2L	2861459	2861857	intron	0.956414	1	0	0	0	0	0	0	0	0	0	0	0	0	0	0	0	0	0	0	0	0	0	0	0	0	0	0	0
Peak516	2L	2887982	2888405	promoter	0.344752	1	0	1	0	0	0	0	0	0	0	0	0	0	0	0	0	0	0	0	0	0	0	0	0	0	0	0	0
Peak517	2L	2888498	2889558	intron	0.447855	1	1	1	0	1	1	0	0	0	1	1	1	1	0	1	1	1	1	1	1	1	1	0	0	0	0	0	0
Peak518	2L	2894109	2894647	intron	0.924114	1	1	1	0	0	1	1	0	0	1	1	1	1	0	1	1	1	1	1	1	0	1	0	1	1	1	1	0
Peak523	2L	2908766	2909358	intron	0.495687	1	1	1	0	0	0	0	0	0	1	1	1	1	0	1	1	1	1	0	0	0	0	0	0	0	0	0	0
Peak524	2L	2909490	2909883	intron	0.610252	1	1	0	0	0	1	0	0	0	1	1	1	1	0	1	1	1	1	1	0	1	1	0	0	0	0	0	0
Peak530	2L	2957942	2958303	intron	0.634766	1	0	1	0	0	0	0	0	0	0	0	0	0	0	0	0	0	0	0	1	0	1	0	0	0	0	0	0
Peak547	2L	3005382	3005972	intron	1.56405	1	0	1	0	0	0	0	0	0	0	0	0	0	0	0	0	0	0	0	0	0	0	0	0	0	0	0	0
Peak548	2L	3006941	3007393	intron	1.03197	1	0	0	1	1	0	0	0	0	0	0	0	0	0	1	0	0	0	0	0	0	0	0	0	0	0	0	0
Peak549	2L	3008921	3009267	intron	0.815102	1	0	1	0	0	0	0	0	0	1	1	0	1	0	0	0	0	1	1	1	0	1	0	0	0	0	0	0
Peak553	2L	3025820	3026291	CDS	0.514401	1	0	1	0	0	0	0	0	0	1	0	0	1	0	1	0	0	1	1	0	0	1	0	0	0	0	0	0
Peak554	2L	3028767	3029384	promoter	0.270753	1	0	1	0	0	0	0	0	0	0	1	0	1	0	0	0	0	0	0	0	0	1	0	0	0	0	0	0
Peak556	2L	3037419	3037649	promoter	0.554104	1	0	0	0	0	0	0	0	0	0	0	0	1	0	0	0	0	1	0	0	0	1	0	0	1	0	0	0
Peak564	2L	3069367	3072965	promoter	0.474548	1	0	1	1	1	1	0	1	0	1	1	1	1	1	1	1	1	0	1	1	1	1	0	0	0	0	0	0
Peak565	2L	3078277	3079093	intron	0.664222	1	0	1	0	0	0	0	0	0	0	1	0	0	0	0	1	0	0	0	1	0	0	1	0	0	0	0	0
Peak567	2L	3080309	3080854	CDS	0.905347	1	0	1	0	0	0	0	0	0	1	1	0	0	0	1	1	0	0	1	1	0	1	0	0	0	0	0	0
Peak568	2L	3082676	3083348	intron	0.930225	1	0	1	0	0	0	0	0	0	0	1	0	0	0	1	0	0	0	0	0	0	1	1	0	0	0	0	0
Peak569	2L	3083450	3084068	intron	0.647272	1	0	0	0	0	0	0	1	0	1	1	0	0	0	0	0	0	0	1	1	0	0	0	0	0	0	0	0
Peak574	2L	3152654	3153296	promoter	0.4672	1	1	1	0	0	0	0	0	0	0	1	0	1	0	0	1	0	0	0	1	0	1	0	0	0	0	0	0
Peak580	2L	3165280	3165662	intron	0.581091	1	0	1	0	0	0	0	0	0	0	0	0	0	1	1	0	1	0	0	0	0	0	0	0	0	0	0	0
Peak588	2L	3302120	3302385	intron	0.885974	1	0	1	0	0	0	0	0	0	0	0	0	1	0	0	0	0	0	0	0	0	1	0	0	0	0	0	0
Peak589	2L	3303015	3303516	promoter	1.20627	1	0	0	0	0	0	0	0	0	0	0	0	0	0	0	0	0	0	0	0	0	0	0	0	0	0	0	0
Peak608	2L	3532432	3532641	UTR	1.1349	1	0	1	0	0	0	0	0	0	0	1	0	0	0	0	0	0	0	0	0	0	0	0	0	0	0	0	0
Peak609	2L	3532950	3533313	intergenic	0.654362	1	0	0	0	0	1	0	0	0	0	0	0	0	0	0	0	0	0	0	0	0	0	0	0	0	0	0	0
Peak611	2L	3538555	3539266	promoter	0.610013	1	1	1	0	0	0	0	0	0	1	1	0	1	0	0	1	0	1	1	1	0	1	0	0	0	0	0	0
Peak613	2L	3541088	3541634	intron	0.498345	1	0	0	0	0	0	0	0	0	1	0	0	1	0	1	0	0	1	0	0	0	1	0	0	0	0	0	0
Peak614	2L	3541726	3542279	intron	1.14671	1	0	0	0	0	0	0	0	0	0	0	0	1	0	0	0	0	1	0	0	0	1	0	0	1	0	1	0
Peak615	2L	3545471	3545915	CDS	0.541529	1	0	1	1	1	0	1	0	0	1	1	0	1	0	1	1	0	1	1	1	0	1	0	0	0	0	0	0
Peak616	2L	3548850	3550218	intergenic	0.482888	1	1	1	0	0	0	0	0	0	1	1	1	1	0	1	1	1	1	1	1	1	1	0	0	0	0	0	0
Peak618	2L	3556205	3556429	intergenic	0.859391	1	0	1	0	0	0	0	0	0	1	1	0	0	0	0	0	0	0	1	1	0	1	0	0	0	0	0	0
Peak621	2L	3588178	3588497	intergenic	0.708603	1	0	0	1	1	1	0	1	0	1	1	1	1	0	1	1	0	1	1	1	0	1	0	0	0	0	0	0
Peak622	2L	3594196	3594445	intergenic	0.657689	1	0	1	0	0	0	0	0	0	0	0	0	0	0	0	0	0	0	0	0	0	0	0	0	0	0	0	0
Peak623	2L	3602327	3603310	intergenic	0.83181	1	0	1	0	0	0	0	0	0	0	0	0	1	0	0	0	0	1	1	1	0	1	0	0	1	0	0	0
Peak625	2L	3608393	3609731	intergenic	0.997807	1	1	1	0	0	0	0	0	0	0	1	0	1	0	0	1	0	1	0	1	0	1	0	0	0	0	0	0
Peak626	2L	3610224	3611448	intergenic	1.05803	1	0	1	0	0	0	0	0	0	0	0	0	0	0	0	0	0	0	0	1	0	0	0	0	0	0	0	0
Peak627	2L	3611852	3612167	intergenic	0.888554	1	0	0	0	0	0	0	0	0	0	0	0	0	0	0	0	0	0	0	0	0	0	0	0	0	0	0	0
Peak628	2L	3614148	3615882	intergenic	1.01404	1	0	1	1	0	1	0	0	0	0	0	0	0	1	0	0	0	0	0	1	0	1	1	0	0	0	0	0
Peak635	2L	3655894	3656319	intron	0.665886	1	0	0	0	0	0	0	0	0	0	0	0	1	0	0	0	0	0	0	0	0	0	0	0	0	0	0	0
Peak639	2L	3769542	3769838	intergenic	0.554416	1	1	1	1	1	1	0	0	0	1	1	1	1	0	1	1	1	1	1	1	1	1	0	0	0	0	0	0
Peak640	2L	3770062	3770599	intergenic	0.633853	1	0	0	0	0	0	0	0	0	0	0	0	0	0	0	0	0	0	0	0	0	0	0	0	0	0	0	0
Peak642	2L	3775479	3776099	intron	1.7734	1	0	1	0	0	0	0	0	0	0	0	0	0	0	0	0	0	0	0	0	0	0	0	0	0	0	0	0
Peak643	2L	3776240	3776581	intron	1.2223	1	0	0	0	0	0	0	1	1	1	1	1	1	0	0	0	0	0	0	0	0	0	0	0	0	0	0	0
Peak644	2L	3776842	3777138	intron	0.741924	1	0	0	1	1	0	0	0	0	0	0	0	0	0	1	0	0	0	0	0	0	0	1	0	0	0	0	0
Peak645	2L	3778489	3779075	promoter	0.498973	1	1	1	0	0	0	0	0	0	1	1	0	1	0	0	0	0	1	1	1	0	1	0	0	1	0	0	0
Peak649	2L	3811157	3811411	CDS	0.651755	1	1	1	0	0	0	0	0	0	0	0	0	0	0	0	0	0	1	0	0	0	0	0	0	0	0	0	0
Peak651	2L	3817691	3818638	intergenic	0.743957	1	1	1	0	0	0	0	0	0	1	1	0	1	0	1	1	1	1	1	1	0	1	0	0	0	0	0	0
Peak653	2L	3821243	3821905	intergenic	1.13964	1	0	1	0	0	0	0	0	0	0	0	0	0	0	0	0	0	0	0	0	0	0	0	0	0	0	0	0
Peak654	2L	3822221	3823160	intergenic	0.414325	1	1	1	0	0	0	1	0	0	0	0	0	1	0	1	1	0	1	0	0	0	1	0	0	1	0	1	1
Peak655	2L	3824063	3824366	intergenic	0.986083	1	0	0	0	0	0	0	0	0	0	0	0	0	0	0	0	0	0	0	0	0	0	0	0	0	0	0	0
Peak656	2L	3824684	3825014	intergenic	1.56002	1	0	1	1	1	0	0	0	0	1	1	1	1	0	1	1	0	0	1	1	0	1	0	0	1	0	0	0
Peak657	2L	3825279	3827065	promoter	0.558654	1	0	1	0	0	1	0	0	0	0	0	0	0	0	0	0	0	0	0	0	0	0	0	0	0	0	0	0
Peak658	2L	3827235	3827776	intergenic	0.630114	1	0	0	1	1	0	1	0	0	0	0	0	0	0	1	0	1	0	0	0	0	0	0	0	0	0	0	0
Peak659	2L	3827982	3828181	intergenic	0.809725	1	0	1	0	0	0	0	0	0	0	0	0	1	0	0	0	0	1	0	1	0	1	0	0	0	0	0	0
Peak660	2L	3829016	3829734	intergenic	1.65343	1	0	1	1	0	0	0	0	0	0	0	0	0	0	0	0	0	0	0	1	0	1	0	0	0	0	0	0
Peak661	2L	3833685	3834512	intergenic	1.83498	1	0	1	0	0	0	0	0	0	0	0	0	0	0	0	0	0	0	0	1	0	0	0	0	0	0	0	0
Peak662	2L	3835400	3835674	intergenic	0.968402	1	0	0	0	0	0	0	0	0	0	0	0	0	0	0	0	0	0	0	0	0	0	0	0	0	0	0	0
Peak665	2L	3845265	3845696	intergenic	0.537515	1	0	0	0	1	0	0	1	0	1	1	0	1	0	0	1	0	0	1	1	0	0	0	0	0	0	0	0
Peak666	2L	3853257	3853635	intergenic	0.724082	1	0	1	0	0	0	0	0	0	0	0	0	0	0	0	0	0	0	0	0	0	0	0	0	0	0	0	0
Peak667	2L	3854336	3854745	intergenic	1.10379	1	0	0	0	0	0	0	0	0	0	0	0	0	0	1	0	1	0	0	0	0	0	0	0	1	0	0	0
Peak668	2L	3861192	3862041	intergenic	0.746108	1	0	0	0	0	0	0	0	0	0	0	0	0	0	1	0	1	0	0	0	0	0	0	0	1	0	0	0
Peak673	2L	3914614	3915003	intron	0.550047	1	0	1	0	0	0	0	0	0	1	1	0	1	0	0	1	0	0	0	1	0	0	0	0	0	0	0	0
Peak675	2L	4028337	4028627	intergenic	0.910722	1	1	1	0	0	1	0	0	0	1	0	1	1	0	1	1	1	1	1	1	1	1	0	1	0	0	0	0
Peak676	2L	4028702	4029165	intergenic	0.839704	1	0	0	0	0	0	0	0	0	0	0	0	0	0	0	0	0	0	0	0	0	0	0	0	0	0	0	0
Peak677	2L	4030183	4030915	intergenic	0.626629	1	1	1	0	0	0	0	0	0	0	0	0	1	0	1	1	1	1	0	0	0	1	0	0	0	0	0	0
Peak691	2L	4048997	4049249	intron	0.734694	1	0	0	0	0	0	0	0	0	0	0	0	0	0	0	0	0	0	0	0	0	0	0	0	0	0	0	0
Peak695	2L	4053603	4054564	intron	0.656455	1	0	1	0	0	0	0	0	0	0	0	0	1	0	0	0	0	0	1	1	0	1	0	0	0	0	0	0
Peak740	2L	4118649	4119015	intergenic	0.599999	1	0	0	0	1	0	0	0	0	1	1	1	1	0	1	0	0	0	1	0	0	0	0	0	0	0	0	0
Peak743	2L	4123267	4123977	CDS	0.802371	1	0	1	1	1	1	0	0	0	0	0	0	0	0	1	0	0	0	0	0	0	0	0	0	0	0	0	0
Peak746	2L	4208643	4209005	CDS	0.979841	1	1	1	1	1	0	0	0	0	0	0	0	0	0	0	0	0	0	0	0	0	1	0	0	0	0	0	0
Peak747	2L	4221094	4222184	promoter	0.413961	1	0	0	1	1	1	1	1	0	1	1	1	1	0	1	1	0	1	1	1	1	1	0	0	0	0	0	0
Peak748	2L	4222295	4223079	intergenic	0.900143	1	1	0	1	1	1	1	1	1	1	1	1	1	0	1	0	0	0	1	1	0	1	0	0	0	0	0	0
Peak761	2L	4312343	4312598	intron	1.58259	1	0	1	0	0	0	0	1	0	1	0	0	1	1	0	0	0	0	1	1	0	1	0	0	1	0	0	0
Peak762	2L	4332261	4332463	intergenic	0.964636	1	0	1	0	0	0	0	0	0	0	0	0	0	0	0	0	0	0	0	1	0	0	0	0	0	0	0	0
Peak763	2L	4333209	4334362	promoter	0.467769	1	0	0	0	0	0	0	0	0	0	0	0	0	0	0	0	0	0	0	0	0	0	0	0	0	0	0	0
Peak764	2L	4334781	4335262	intron	0.872162	1	0	1	1	0	0	0	0	0	0	0	0	0	0	0	0	0	0	0	0	0	0	0	0	0	0	0	0
Peak765	2L	4335719	4336330	intron	0.340748	1	0	0	0	0	0	0	0	0	0	0	0	0	0	0	0	0	0	0	0	0	0	0	0	0	0	0	0
Peak766	2L	4340169	4340531	intron	0.611609	1	0	1	0	0	0	0	0	0	0	0	0	0	0	0	0	0	0	0	0	0	0	0	0	0	0	0	0
Peak770	2L	4350999	4351580	intergenic	0.893966	1	1	1	0	0	0	0	0	0	0	0	0	1	0	0	1	0	1	1	1	1	1	0	0	0	0	0	0
Peak771	2L	4351831	4352324	intergenic	1.15005	1	0	1	0	0	0	0	1	0	0	1	0	0	0	1	0	0	0	0	1	0	0	1	0	0	0	1	0
Peak773	2L	4354773	4355343	intergenic	0.75134	1	1	1	0	0	0	0	0	0	0	0	0	0	0	0	1	0	0	0	1	0	0	0	0	0	0	0	0
Peak774	2L	4357821	4358038	intergenic	1.53412	1	1	1	0	0	0	0	0	0	0	0	0	0	0	0	0	0	1	0	1	0	1	0	0	1	0	0	0
Peak777	2L	4366478	4367065	intron	0.465987	1	0	1	0	0	0	0	0	0	1	1	0	0	0	0	0	0	0	1	1	0	1	0	0	0	0	0	0
Peak781	2L	4373076	4373591	intron	0.672609	1	1	1	0	1	1	0	0	0	1	1	0	1	0	1	1	0	1	0	1	0	0	0	1	0	1	0	1
Peak783	2L	4374892	4375700	intron	0.424719	1	1	1	0	1	0	0	0	0	1	1	0	1	0	1	1	0	1	1	1	0	1	0	0	0	0	0	0
Peak806	2L	4533545	4533865	CDS	0.561889	1	1	1	1	1	1	1	0	1	1	1	0	1	1	1	1	0	1	1	1	1	1	0	1	0	1	0	1
Peak809	2L	4574490	4575029	intron	1.41087	1	0	0	1	0	0	0	0	0	0	0	0	0	0	1	0	1	0	0	0	0	0	0	0	0	0	0	0
Peak810	2L	4591880	4592424	promoter	0.470222	1	0	0	0	0	0	0	0	0	0	0	0	0	0	0	0	0	0	0	0	0	0	0	0	0	0	0	0
Peak812	2L	4597267	4598161	intron	0.769848	1	0	0	0	0	0	0	0	0	0	0	0	0	0	0	0	0	0	0	0	0	0	0	0	0	0	0	0
Peak814	2L	4614106	4614718	promoter	0.39507	1	0	0	0	0	0	0	0	0	1	0	0	0	0	0	0	0	0	1	0	0	0	0	0	0	0	0	0
Peak815	2L	4684434	4684663	promoter	1.50466	1	0	1	0	0	0	0	0	0	0	0	0	0	0	0	0	0	0	0	0	0	0	0	0	0	0	0	0
Peak823	2L	4823086	4824322	intron	0.431816	1	1	1	0	0	0	0	0	0	0	0	0	0	0	0	1	0	0	0	1	0	0	0	0	0	0	0	0
Peak824	2L	4824588	4824880	intron	0.727661	1	0	1	0	0	0	0	0	0	1	1	0	1	0	0	0	0	0	0	1	0	0	0	0	0	0	0	0
Peak825	2L	4825258	4825872	CDS	0.620735	1	0	0	1	1	1	0	0	0	1	1	1	1	0	1	1	1	1	1	1	1	1	0	0	0	0	0	0
Peak826	2L	4826552	4827791	CDS	0.850965	1	0	0	0	0	0	0	0	0	0	1	1	1	0	0	0	1	1	0	0	0	1	0	0	1	0	0	0
Peak827	2L	4828923	4830866	promoter	0.511767	1	0	0	1	0	0	0	0	0	0	0	0	0	0	0	0	0	1	0	0	0	0	0	0	1	0	0	0
Peak831	2L	4846719	4847035	promoter	0.594158	1	0	1	0	0	0	0	0	0	0	0	0	0	0	0	0	0	0	0	0	0	0	0	0	0	0	0	0
Peak838	2L	4893106	4893605	intron	0.385867	1	0	1	1	0	0	0	0	0	0	0	0	0	0	0	0	0	0	0	0	0	0	0	0	0	0	0	0
Peak840	2L	4901690	4903430	CDS	0.491358	1	0	1	0	0	0	0	0	0	0	0	0	0	0	0	0	0	0	0	0	0	0	0	0	0	0	0	0
Peak841	2L	4903491	4903747	UTR	0.742821	1	0	1	0	0	0	0	0	0	1	1	0	0	0	1	0	0	0	1	1	0	0	0	0	0	0	0	0
Peak842	2L	4906670	4906886	promoter	0.951506	1	1	1	0	0	0	0	0	0	0	0	0	1	0	0	0	1	1	0	0	1	1	0	0	1	0	1	0
Peak855	2L	4994507	4994990	CDS	0.757918	1	0	0	0	0	0	0	0	0	0	0	0	0	0	0	0	0	0	0	0	0	0	0	0	0	0	0	0
Peak862	2L	5037349	5037813	intergenic	1.11255	1	0	0	0	0	0	0	0	0	0	0	0	0	0	0	0	0	0	0	0	0	0	0	0	0	0	0	0
Peak868	2L	5049990	5050274	promoter	0.942078	1	1	1	0	0	1	0	0	0	1	1	1	1	0	1	1	1	1	1	1	1	1	0	0	1	0	1	0
Peak878	2L	5095538	5095741	UTR	0.737062	1	0	1	1	0	0	0	0	0	0	0	0	0	0	0	0	0	0	0	0	0	0	0	0	0	0	0	0
Peak884	2L	5202518	5203019	intron	0.470771	1	1	1	0	1	0	0	0	0	1	1	0	0	0	1	1	1	1	1	1	1	1	0	0	0	0	1	0
Peak896	2L	5232093	5232515	intron	0.42489	1	1	1	0	1	0	0	0	0	1	1	0	1	0	1	1	0	1	1	1	1	1	0	0	0	0	0	0
Peak898	2L	5233501	5234300	intron	0.502974	1	0	1	0	0	0	0	0	0	0	0	0	0	1	0	0	0	0	1	1	0	0	0	0	0	0	0	0
Peak899	2L	5234961	5235568	intron	1.20161	1	0	1	1	1	0	0	0	0	1	1	1	1	0	1	1	1	1	1	1	1	1	0	0	0	0	0	0
Peak902	2L	5239351	5241569	CDS	0.426335	1	0	0	1	0	1	0	0	0	0	0	0	0	0	1	0	0	0	0	0	0	0	0	0	0	0	0	0
Peak903	2L	5242840	5243222	intron	0.770566	1	0	0	0	1	0	0	0	0	0	1	0	0	0	0	0	0	0	0	1	0	0	0	0	0	0	0	0
Peak908	2L	5276360	5277665	promoter	0.939578	1	0	0	0	1	0	0	0	0	1	1	0	1	0	0	0	0	0	0	1	0	0	0	0	0	0	0	0
Peak921	2L	5362414	5362871	CDS	0.848575	1	1	1	0	0	0	0	0	0	0	0	0	0	0	0	1	0	0	1	1	0	0	0	0	0	0	0	0
Peak923	2L	5381409	5381706	intergenic	0.643518	1	0	0	0	0	0	0	0	0	0	1	0	0	0	0	0	0	0	0	0	0	0	0	0	0	0	1	0
Peak924	2L	5392061	5392343	intergenic	0.858327	1	0	1	0	0	0	0	0	0	0	0	0	0	0	0	0	0	0	0	0	0	0	0	0	0	0	0	0
Peak925	2L	5400617	5400910	intergenic	0.972244	1	1	1	0	0	0	0	0	0	0	0	0	0	0	0	1	0	0	0	1	0	0	0	0	0	0	0	0
Peak931	2L	5429412	5429665	intergenic	0.973646	1	0	1	0	0	0	0	0	0	0	0	0	0	0	0	0	0	0	0	0	0	0	0	0	0	0	0	0
Peak932	2L	5455595	5455871	intergenic	1.21334	1	0	1	0	0	0	0	0	0	0	0	0	0	0	0	0	0	0	0	1	0	1	0	0	0	0	0	0
Peak933	2L	5456937	5457155	intergenic	1.15482	1	0	0	0	1	0	0	0	0	0	0	0	0	0	0	0	0	0	0	0	0	0	0	0	0	0	0	0
Peak935	2L	5464590	5464984	intron	0.862215	1	0	1	0	0	0	0	0	0	0	0	0	1	0	0	0	0	1	1	1	0	1	0	0	0	0	0	0
Peak937	2L	5473833	5474575	intergenic	0.957393	1	0	0	0	0	0	0	0	0	0	1	0	0	0	0	0	0	1	0	1	0	0	0	0	0	0	1	0
Peak938	2L	5500174	5500758	intergenic	0.884004	1	0	1	0	0	0	0	0	0	0	1	0	0	0	0	0	0	0	0	1	0	0	0	0	0	0	0	0
Peak949	2L	5550630	5551103	promoter	1.30587	1	0	0	0	0	0	0	0	0	0	0	0	0	1	0	0	1	0	0	0	0	0	0	0	0	0	0	0
Peak953	2L	5730825	5731093	intron	0.564756	1	0	0	1	1	1	0	0	0	1	1	1	1	0	1	1	1	1	1	1	1	1	0	0	0	0	0	0
Peak955	2L	5777541	5777980	intron	1.04051	1	0	0	1	1	0	0	0	0	1	1	0	1	0	1	1	0	1	1	0	0	1	0	0	0	0	0	0
Peak957	2L	5781205	5781429	intron	0.94136	1	0	1	0	0	0	0	0	0	0	0	0	0	0	0	1	0	0	0	1	0	1	0	0	0	0	0	0
Peak959	2L	5789163	5789741	intron	0.970213	1	0	0	0	0	0	0	0	0	0	0	0	0	0	0	0	0	0	0	0	0	0	0	0	0	0	0	0
Peak964	2L	5870635	5871781	intron	0.588501	1	1	1	0	0	0	0	0	0	0	0	0	1	0	1	1	0	1	0	0	0	1	0	0	1	0	1	0
Peak967	2L	5879808	5880049	intergenic	0.794788	1	0	0	0	0	0	0	0	0	0	0	0	0	1	1	0	1	0	0	0	0	0	0	0	0	0	0	0
Peak968	2L	5890599	5891026	intergenic	0.620618	1	0	1	0	1	0	0	0	0	1	1	0	0	0	1	1	0	0	1	1	0	0	0	0	0	0	1	0
Peak969	2L	5891794	5892208	intergenic	1.68782	1	0	1	1	1	1	0	1	0	1	1	1	1	0	1	1	0	1	1	1	1	1	0	0	0	0	0	0
Peak970	2L	5892509	5892717	CDS	0.759486	1	0	1	0	0	0	0	0	0	0	0	0	0	0	0	0	0	0	0	0	0	1	0	0	0	0	0	0
Peak971	2L	5902938	5903289	intergenic	0.900637	1	0	0	0	1	0	0	1	0	1	1	0	0	0	0	0	0	0	1	1	0	0	0	0	1	0	1	0
Peak975	2L	5961600	5961945	intergenic	1.06048	1	0	1	0	0	0	0	0	0	0	1	0	0	0	0	0	0	0	0	1	0	1	0	0	0	0	0	0
Peak976	2L	5968980	5969455	CDS	1.19297	1	0	1	1	1	1	0	0	0	0	0	0	0	0	1	0	0	0	0	1	0	0	1	0	0	0	0	0
Peak988	2L	6000646	6000848	intergenic	0.769014	1	0	0	0	0	0	0	0	0	0	0	0	0	0	0	0	0	0	0	0	0	0	0	0	0	0	0	0
Peak989	2L	6000904	6001101	CDS	0.765838	1	1	1	0	1	0	1	0	0	0	0	0	1	0	0	0	0	1	0	0	0	1	0	0	1	0	1	0
Peak990	2L	6004738	6005174	CDS	1.02273	1	1	1	0	0	0	0	0	0	0	0	0	0	0	0	0	0	0	0	1	0	0	0	0	0	0	0	0
Peak991	2L	6019840	6020060	intergenic	0.797528	1	0	0	0	0	0	0	0	0	0	0	0	0	0	0	0	0	0	0	0	0	0	0	0	0	0	0	0
Peak1004	2L	6078724	6079472	intergenic	0.588917	1	0	0	0	0	0	0	0	0	0	0	0	0	0	0	0	0	0	0	0	0	0	0	0	0	0	0	0
Peak1005	2L	6081305	6081543	intergenic	0.871893	1	0	0	1	1	0	0	0	0	1	1	1	1	0	1	0	0	1	1	1	0	1	0	0	0	0	0	0
Peak1011	2L	6156594	6157047	intergenic	0.958235	1	0	1	0	0	0	0	0	0	0	0	0	0	0	0	0	0	0	0	1	0	0	0	0	0	0	0	0
Peak1014	2L	6180041	6180387	intron	0.532895	1	0	1	1	1	0	1	0	0	1	1	1	1	0	1	1	1	1	1	1	1	1	0	0	0	0	0	0
Peak1016	2L	6204769	6205144	intron	1.1612	1	1	1	0	0	0	0	0	0	0	0	0	1	0	0	0	0	1	0	0	0	1	0	0	1	0	0	0
Peak1017	2L	6213177	6213897	intergenic	0.954642	1	0	0	0	0	0	0	1	0	1	1	1	1	0	0	0	0	0	1	1	0	1	0	0	0	0	0	0
Peak1018	2L	6229191	6229815	intergenic	0.548528	1	0	0	0	0	0	0	1	0	1	1	0	1	0	0	0	0	0	0	0	0	0	0	0	0	0	0	0
Peak1019	2L	6241122	6241376	intergenic	0.817859	1	0	1	0	0	0	0	0	0	1	1	0	1	0	1	1	0	1	1	1	0	1	0	0	0	0	0	0
Peak1020	2L	6241950	6242408	intergenic	0.969071	1	0	0	0	0	0	0	0	0	0	0	0	0	0	1	0	0	0	1	0	0	0	0	0	0	0	0	0
Peak1021	2L	6250313	6250535	intergenic	0.911746	1	1	1	0	0	0	0	0	0	0	0	0	0	0	0	0	0	0	0	0	0	0	0	0	0	0	0	0
Peak1024	2L	6259510	6259976	intron	0.702758	1	0	1	0	0	0	0	0	0	0	0	0	0	0	0	0	0	0	0	0	0	0	0	0	0	0	0	0
Peak1026	2L	6337651	6337958	intron	0.831253	1	0	1	0	0	0	0	0	0	0	0	0	0	0	0	0	0	0	0	1	0	0	0	0	0	0	0	0
Peak1029	2L	6372949	6377558	CDS	1.75456	1	0	0	0	0	0	0	1	0	1	1	0	1	0	0	0	0	0	0	0	0	0	0	0	0	0	0	0
Peak1030	2L	6390369	6390737	intron	1.05097	1	0	0	0	0	0	0	0	0	0	0	0	0	0	0	0	0	0	0	0	0	0	0	0	0	0	0	0
Peak1031	2L	6411047	6411646	promoter	0.487835	1	1	1	0	0	0	0	0	0	0	0	0	1	0	0	1	0	1	1	1	0	1	0	0	0	0	0	0
Peak1045	2L	6532198	6532742	intron	1.40753	1	0	1	1	0	0	0	0	0	0	0	0	0	0	0	0	0	0	0	0	0	0	0	0	0	0	0	0
Peak1047	2L	6543871	6544266	intron	1.92813	1	0	1	1	0	0	0	0	0	0	0	0	0	0	0	0	0	0	1	1	0	0	0	0	0	0	0	0
Peak1048	2L	6544683	6544918	intron	1.6619	1	0	1	0	0	0	0	0	0	0	0	0	0	0	0	0	0	0	0	1	0	0	0	0	0	0	0	0
Peak1061	2L	6648386	6649691	promoter	0.39085	1	0	1	0	0	0	0	1	0	0	1	0	0	0	0	0	0	0	0	1	0	0	0	0	0	0	0	0
Peak1068	2L	6700860	6701073	intron	1.01094	1	0	0	0	0	0	0	0	0	0	0	0	0	1	1	0	1	0	0	0	0	0	0	0	0	0	0	0
Peak1073	2L	6724911	6725193	CDS	0.88934	1	0	0	1	1	1	0	0	0	0	0	1	0	0	1	0	1	0	0	0	0	0	0	0	1	0	0	1
Peak1074	2L	6737721	6738121	CDS	1.40576	1	0	1	0	0	0	0	0	0	0	0	0	0	0	0	0	0	0	0	1	0	0	0	0	0	0	0	0
Peak1078	2L	6795184	6795488	intron	0.822191	1	0	0	0	0	0	0	0	0	0	0	0	0	0	1	0	1	0	0	1	0	0	0	0	0	0	0	0
Peak1080	2L	6826319	6826691	intron	1.12561	1	1	1	1	1	1	1	0	0	1	1	1	1	0	1	1	1	1	1	1	1	1	0	0	0	0	0	0
Peak1083	2L	6841133	6841485	intergenic	0.77072	1	1	1	1	1	1	1	0	0	1	1	1	1	0	1	1	1	1	1	1	1	1	0	0	0	0	0	0
Peak1095	2L	6923806	6924484	CDS	0.618086	1	1	1	0	0	0	0	0	0	1	1	0	1	0	1	1	0	1	1	1	1	1	0	0	0	0	0	0
Peak1110	2L	6965154	6965391	CDS	0.40449	1	0	1	0	0	0	0	0	0	0	0	0	1	0	0	0	0	1	1	1	0	1	0	0	0	0	0	0
Peak1116	2L	6973265	6973932	CDS	0.698377	1	0	0	0	0	0	0	0	0	1	0	0	1	0	1	0	0	0	1	0	0	0	0	0	0	0	0	0
Peak1117	2L	6975393	6975642	intron	0.825468	1	1	1	1	1	1	0	0	0	1	0	0	0	0	1	0	0	0	0	0	0	0	1	0	0	0	0	0
Peak1119	2L	6990143	6990676	intron	0.736625	1	1	1	1	1	0	0	0	0	1	1	1	1	0	1	1	0	1	1	1	1	1	0	0	0	0	0	0
Peak1125	2L	7006561	7007062	intron	1.34148	1	0	1	1	1	1	1	0	0	1	1	1	1	0	1	1	1	1	1	1	1	1	0	0	0	0	0	0
Peak1136	2L	7036931	7037424	CDS	0.35917	1	1	1	0	1	0	0	0	0	1	1	1	1	0	1	1	1	1	1	1	1	0	0	0	0	0	1	0
Peak1140	2L	7042899	7043586	intron	0.396748	1	0	0	0	1	0	1	0	0	1	1	0	0	0	0	1	0	1	1	1	0	0	1	0	1	1	1	0
Peak1141	2L	7043851	7044459	intron	0.778721	1	0	1	0	1	1	0	0	0	1	1	0	0	1	0	1	0	1	1	1	0	0	1	1	1	1	1	0
Peak1147	2L	7051352	7053415	CDS	0.362401	1	0	1	0	0	0	0	0	1	0	0	0	0	0	0	0	0	0	1	1	1	1	0	0	0	0	0	0
Peak1148	2L	7053487	7054763	CDS	0.375377	1	1	1	0	0	0	0	0	0	0	1	0	1	0	1	1	1	1	1	1	0	1	0	0	0	0	0	0
Peak1154	2L	7096680	7096972	intergenic	1.19964	1	0	0	0	0	0	0	0	0	0	0	0	0	0	0	0	0	0	0	0	0	0	0	0	0	0	0	0
Peak1155	2L	7119675	7119972	intron	0.819914	1	1	1	0	0	1	0	0	0	0	0	0	0	0	0	0	0	0	0	0	0	0	0	0	0	0	0	0
Peak1157	2L	7138360	7138963	intron	1.47243	1	0	1	1	1	0	0	0	0	0	0	0	0	0	0	0	0	0	0	0	0	0	0	0	0	0	0	0
Peak1158	2L	7148385	7148663	intron	1.51856	1	0	0	0	0	0	0	1	0	0	1	0	0	0	0	0	0	0	0	0	0	0	0	0	0	0	0	0
Peak1160	2L	7178948	7179160	intergenic	0.672637	1	0	1	0	1	0	0	0	0	1	1	1	1	0	1	1	1	1	1	1	1	1	0	0	0	0	0	0
Peak1173	2L	7247416	7247822	intron	0.855415	1	0	1	0	0	0	0	0	0	0	0	0	0	1	0	0	0	0	0	1	0	0	0	0	0	0	0	0
Peak1176	2L	7289541	7291015	intergenic	0.642551	1	0	0	0	0	0	0	0	0	0	1	0	0	0	0	0	0	0	0	0	0	0	1	0	0	0	0	0
Peak1177	2L	7295477	7295916	intergenic	0.963289	1	1	1	0	0	0	0	0	0	1	1	1	1	0	1	1	1	1	0	0	0	0	0	0	0	0	0	0
Peak1178	2L	7296329	7296901	intergenic	0.898314	1	0	1	0	0	0	1	0	0	0	1	0	0	1	0	0	0	1	0	1	0	0	1	0	0	0	1	0
Peak1179	2L	7299349	7299789	intergenic	0.623075	1	0	0	0	0	0	0	0	0	0	0	0	0	0	0	0	0	0	0	0	0	0	0	0	0	0	0	0
Peak1182	2L	7304082	7305373	intergenic	0.692082	1	1	1	0	0	0	0	0	0	0	0	0	0	0	1	1	1	0	0	1	0	0	0	0	0	0	0	0
Peak1183	2L	7305506	7305961	intergenic	0.805757	1	1	1	0	0	0	0	0	0	0	0	0	0	0	1	0	0	1	0	0	0	0	0	0	0	0	0	0
Peak1186	2L	7309880	7311292	intron	0.451585	1	0	1	0	0	0	0	0	0	0	1	0	1	0	0	0	0	0	0	1	0	1	0	0	0	0	0	0
Peak1189	2L	7312883	7313088	CDS	0.497784	1	1	1	0	0	0	0	0	0	0	1	0	0	0	0	1	1	0	1	1	1	1	0	0	0	0	0	0
Peak1191	2L	7340134	7340379	intron	0.807171	1	0	0	1	0	0	0	1	0	1	1	1	1	0	1	0	0	0	1	1	0	0	0	0	0	0	0	0
Peak1192	2L	7363007	7363421	intergenic	0.759117	1	1	0	0	0	0	0	0	0	0	0	0	1	0	0	0	0	1	0	0	0	1	0	0	1	0	1	0
Peak1201	2L	7426922	7427121	promoter	0.88419	1	0	0	0	0	0	0	0	1	1	0	0	1	0	1	0	0	0	0	0	0	0	0	0	0	0	0	0
Peak1207	2L	7505603	7505903	intron	0.517684	1	0	0	0	0	0	0	0	0	0	0	0	0	0	0	0	0	0	0	0	0	0	0	0	0	0	0	0
Peak1214	2L	7518298	7519064	intron	0.640894	1	0	0	0	0	0	0	0	0	0	0	0	0	0	0	0	0	0	0	0	0	0	0	0	0	0	0	0
Peak1215	2L	7519439	7521089	intron	0.460965	1	0	0	1	0	0	1	1	0	0	0	0	0	0	0	0	0	1	0	0	0	0	0	0	0	0	0	0
Peak1225	2L	7536274	7536747	CDS	0.3833	1	0	1	0	0	0	0	0	0	0	0	0	0	0	0	0	0	0	0	1	0	0	0	0	0	0	0	0
Peak1226	2L	7538981	7539392	intron	0.734568	1	0	0	0	0	0	0	0	0	0	0	0	0	0	0	0	0	0	0	0	0	0	0	0	0	0	0	0
Peak1227	2L	7539691	7540198	intron	0.986226	1	0	1	0	0	0	0	0	0	0	0	0	0	0	0	0	0	0	0	0	0	0	0	0	0	0	0	0
Peak1228	2L	7540430	7540695	intron	1.27785	1	0	0	1	0	0	0	0	0	0	0	0	0	0	0	0	0	0	0	0	0	0	0	1	0	0	0	0
Peak1232	2L	7545391	7545895	intron	0.723326	1	0	0	0	0	0	0	0	0	0	0	0	0	0	0	0	0	0	0	0	0	0	0	0	0	0	0	0
Peak1233	2L	7576363	7576668	promoter	0.47667	1	0	1	0	0	0	0	1	0	0	1	0	1	0	0	0	0	0	0	1	0	0	0	0	0	0	0	0
Peak1237	2L	7611232	7611560	intron	0.870822	1	0	1	1	0	0	0	0	0	0	0	0	0	0	0	0	0	0	0	1	0	0	0	0	0	0	0	0
Peak1238	2L	7624451	7624648	intergenic	0.927922	1	0	1	1	0	1	0	0	0	0	0	0	0	1	1	0	1	1	0	1	0	0	0	0	0	0	0	0
Peak1239	2L	7632531	7632839	intergenic	1.14931	1	1	1	0	1	1	1	0	0	0	0	0	1	0	1	0	0	1	0	0	0	1	0	0	1	0	1	1
Peak1240	2L	7633011	7633357	intergenic	0.814844	1	0	1	1	0	0	0	0	0	0	0	0	0	0	0	0	0	0	0	0	0	0	0	0	0	0	0	0
Peak1241	2L	7640932	7641165	intergenic	1.01254	1	1	0	0	0	0	0	0	0	0	0	0	0	0	0	0	0	0	0	0	0	0	0	0	0	0	0	0
Peak1282	2L	8084466	8085177	intron	0.399903	1	0	1	1	1	1	0	0	0	1	0	0	0	0	1	0	0	0	0	0	0	0	0	0	1	0	0	0
Peak1286	2L	8091018	8091246	intron	0.995542	1	0	1	0	0	0	0	0	0	0	1	0	0	0	0	1	0	0	0	0	0	0	1	0	1	0	1	0
Peak1287	2L	8093051	8093537	intron	0.813414	1	0	0	0	1	1	1	0	0	0	1	0	1	0	0	0	1	1	0	0	0	1	1	0	1	1	1	0
Peak1289	2L	8104067	8104440	intron	0.83727	1	0	0	1	0	0	1	0	0	0	0	0	1	0	1	0	0	1	0	0	0	0	1	0	0	0	1	0
Peak1295	2L	8127467	8127959	intron	0.821352	1	0	0	0	0	0	0	0	0	0	0	0	0	0	0	0	0	0	0	0	0	0	0	0	0	0	0	0
Peak1299	2L	8143856	8144437	promoter	1.09994	1	0	0	0	0	0	1	0	0	0	0	1	1	0	1	0	1	1	0	0	1	0	0	1	0	1	1	0
Peak1300	2L	8145168	8145821	promoter	0.825888	1	0	0	0	0	0	0	0	0	0	0	0	0	0	0	0	0	0	0	0	0	0	0	0	0	0	0	0
Peak1301	2L	8146527	8147186	intron	0.686969	1	1	1	0	1	0	0	0	0	1	1	0	0	0	1	1	0	0	1	1	0	0	1	0	1	1	1	0
Peak1302	2L	8147663	8148120	CDS	0.922739	1	0	1	0	0	0	0	0	0	0	0	0	0	1	1	0	0	0	0	1	0	0	1	0	0	0	0	0
Peak1303	2L	8148503	8149130	promoter	1.03332	1	1	1	0	0	1	0	0	0	0	0	1	1	0	1	1	1	1	0	0	0	1	0	0	0	0	0	0
Peak1307	2L	8158083	8158552	CDS	0.95753	1	0	1	1	1	0	0	0	0	0	0	0	0	0	1	0	0	0	0	0	0	0	0	0	0	0	0	0
Peak1309	2L	8165903	8166471	intron	0.66547	1	0	0	0	0	0	0	0	0	0	0	0	0	0	0	0	0	0	0	0	0	0	0	0	0	0	0	0
Peak1311	2L	8167216	8168084	intron	1.05354	1	0	1	1	1	0	0	0	0	0	0	0	0	0	1	0	0	0	0	0	0	0	0	0	0	0	0	0
Peak1312	2L	8185111	8185406	CDS	0.829471	1	1	1	1	1	1	1	0	0	1	1	1	1	0	1	1	1	1	1	1	1	1	0	0	0	0	0	0
Peak1320	2L	8254379	8254595	intron	1.00233	1	0	1	0	0	0	0	0	0	0	0	0	0	0	0	0	0	0	0	1	0	0	0	0	0	0	0	0
Peak1323	2L	8266773	8267118	intron	0.352863	1	0	1	0	0	0	0	0	0	0	1	0	0	0	0	0	0	0	0	1	0	0	0	0	0	0	0	0
Peak1325	2L	8275782	8276734	intron	0.469134	1	1	1	1	0	0	0	0	0	0	0	0	0	0	0	0	0	0	0	0	0	0	0	0	0	0	0	0
Peak1328	2L	8280109	8280584	intron	0.643886	1	1	1	0	1	1	0	0	0	1	1	1	1	0	1	1	1	1	1	1	1	1	0	0	0	0	0	0
Peak1330	2L	8288149	8288412	intron	0.930637	1	0	1	0	0	1	0	0	0	0	1	0	0	0	0	0	0	0	0	1	0	0	0	0	0	1	1	0
Peak1332	2L	8290559	8290879	intron	0.68615	1	0	1	0	1	0	0	0	0	1	1	1	0	1	1	1	1	0	1	1	1	1	0	0	1	0	1	0
Peak1338	2L	8304745	8305138	CDS	0.566042	1	1	1	1	1	1	0	0	0	1	1	1	1	1	1	1	1	1	1	1	1	1	0	0	0	0	0	0
Peak1346	2L	8365944	8366677	promoter	0.415883	1	0	1	0	1	1	1	1	0	1	1	0	0	0	1	1	0	1	0	1	0	0	1	1	1	1	1	0
Peak1353	2L	8386561	8387524	CDS	0.480645	1	0	0	0	1	0	1	0	0	0	1	0	1	0	0	1	1	1	0	1	0	1	1	1	1	1	1	0
Peak1358	2L	8414648	8415266	promoter	0.514978	1	1	1	0	0	0	0	0	0	0	0	1	1	0	0	1	1	1	1	1	1	1	0	0	1	0	0	0
Peak1384	2L	8529526	8529850	intron	0.962522	1	0	1	1	1	1	0	0	0	0	0	0	0	0	1	0	0	0	0	0	0	0	0	0	0	0	0	0
Peak1387	2L	8543161	8543458	promoter	0.621028	1	0	1	1	0	0	0	0	0	0	0	0	0	0	1	0	0	0	0	0	0	0	0	0	0	0	0	0
Peak1390	2L	8545406	8545921	intron	0.761813	1	1	1	1	1	1	1	0	0	1	1	1	1	0	1	1	1	1	1	1	1	1	0	0	0	0	0	0
Peak1391	2L	8578526	8578835	intron	1.67871	1	0	1	0	0	0	0	0	0	0	0	0	0	1	0	0	0	0	1	1	0	1	0	0	0	0	0	0
Peak1392	2L	8587917	8588232	intron	0.779364	1	1	1	0	0	0	0	0	0	0	0	0	0	0	0	0	0	1	1	1	0	1	0	0	0	0	0	0
Peak1400	2L	8789192	8789565	intergenic	0.960478	1	0	1	1	1	1	0	0	0	1	0	0	0	0	1	0	1	0	0	0	0	0	0	0	0	0	0	0
Peak1401	2L	8808010	8808300	intergenic	0.747615	1	0	0	0	0	0	0	0	0	1	1	0	1	0	0	0	0	0	0	1	0	0	0	0	0	0	0	0
Peak1402	2L	8809575	8810507	intergenic	0.684289	1	1	1	0	0	0	0	0	0	1	1	0	1	0	1	1	0	1	1	1	1	1	0	0	0	0	0	0
Peak1403	2L	8811203	8811827	intergenic	0.622192	1	1	1	1	0	0	0	0	0	0	0	0	0	0	0	0	0	0	0	0	0	0	0	0	0	0	0	0
Peak1404	2L	8818175	8818360	intergenic	1.24008	1	0	0	0	0	0	0	0	0	0	0	0	0	0	1	0	0	0	0	0	0	0	0	0	0	0	0	0
Peak1405	2L	8822208	8822594	intergenic	0.8815	1	1	1	0	0	0	0	0	0	0	1	0	0	0	0	1	0	0	0	1	0	0	0	0	0	0	0	0
Peak1408	2L	8826441	8828848	CDS	0.529175	1	0	0	0	0	0	0	0	0	0	0	0	0	0	0	0	1	0	0	0	0	0	0	0	0	0	0	0
Peak1409	2L	8831967	8833292	intergenic	1.01647	1	0	1	0	0	0	0	0	0	0	0	0	0	0	0	0	0	0	0	0	0	0	0	0	0	0	0	0
Peak1410	2L	8838438	8838626	intergenic	1.26065	1	0	1	0	0	0	0	0	0	0	1	0	0	0	0	0	0	0	0	1	0	0	0	0	0	0	0	0
Peak1411	2L	8838929	8839197	intergenic	0.576967	1	1	0	0	1	0	0	0	0	0	0	0	0	0	0	0	0	1	0	0	0	1	0	0	0	0	1	0
Peak1413	2L	8843591	8844025	intergenic	0.893717	1	0	0	0	0	0	0	0	0	0	0	0	0	0	0	0	0	0	0	0	0	0	0	0	0	0	0	0
Peak1414	2L	8844709	8844926	intergenic	0.749552	1	0	1	0	1	0	0	0	0	1	1	0	1	0	1	1	0	0	1	1	0	1	0	0	0	0	0	0
Peak1415	2L	8845793	8846441	intergenic	0.762612	1	0	0	0	0	0	0	0	0	1	1	0	0	0	0	0	0	0	0	0	0	0	0	0	0	0	0	0
Peak1417	2L	8849092	8849957	intergenic	0.619182	1	0	0	0	0	0	0	0	0	0	0	0	0	0	0	0	0	0	0	0	0	0	0	0	0	0	0	0
Peak1420	2L	8870161	8870401	intergenic	1.36896	1	0	0	0	0	0	0	0	0	0	0	0	0	0	0	0	0	0	0	0	0	0	0	0	0	0	0	0
Peak1422	2L	8872245	8872889	intergenic	0.611575	1	0	0	0	0	0	0	0	0	0	0	0	1	0	0	0	0	0	0	0	0	0	0	0	0	0	0	0
Peak1423	2L	8875685	8876395	intergenic	0.562772	1	1	1	0	0	0	0	0	0	0	0	0	0	0	0	0	0	0	0	0	0	0	0	0	0	0	0	0
Peak1427	2L	8949853	8950309	intron	0.842938	1	0	1	0	0	0	0	1	0	0	1	0	0	0	1	0	0	1	0	0	0	0	1	0	0	0	0	0
Peak1433	2L	9120994	9121333	intergenic	0.683201	1	0	1	0	0	0	0	0	0	0	0	0	0	1	0	0	0	0	0	1	0	0	0	0	0	0	0	0
Peak1436	2L	9126080	9126436	intron	1.1929	1	0	1	0	0	0	0	0	0	0	1	0	0	0	0	0	0	0	0	1	0	0	0	0	0	0	0	0
Peak1440	2L	9137973	9138576	intron	0.555294	1	0	1	1	0	1	0	1	0	0	0	0	0	1	1	0	1	1	0	1	0	0	1	0	0	0	0	0
Peak1446	2L	9149679	9150529	intron	0.791351	1	0	0	1	1	1	0	0	0	0	0	0	1	0	1	1	1	1	1	1	1	0	0	0	1	0	1	1
Peak1453	2L	9186669	9186909	intron	1.14544	1	1	1	0	1	0	0	0	0	1	0	1	1	0	1	0	1	1	0	0	0	1	0	0	1	0	1	0
Peak1454	2L	9226313	9226645	intron	0.585493	1	0	0	0	0	0	0	0	0	0	0	0	0	0	0	0	1	1	0	0	0	0	0	0	0	0	0	0
Peak1457	2L	9252028	9252459	CDS	0.394337	1	0	1	0	0	0	0	0	0	0	1	0	0	0	0	0	0	0	0	1	0	0	0	0	0	0	0	0
Peak1462	2L	9416158	9416662	promoter	0.481281	1	1	0	0	0	0	0	0	0	1	1	0	1	0	1	1	1	1	0	0	0	1	0	0	0	0	0	0
Peak1464	2L	9421289	9421806	intron	0.803353	1	0	1	0	0	0	0	0	0	0	0	0	1	0	0	0	0	1	0	0	0	1	0	0	0	0	0	0
Peak1466	2L	9431301	9432027	promoter	0.344543	1	0	1	1	1	0	0	0	0	0	0	0	0	0	1	0	0	0	0	0	0	0	1	0	0	0	0	0
Peak1475	2L	9460992	9461453	CDS	0.531111	1	0	0	0	0	0	0	0	0	1	1	0	1	0	0	0	0	1	0	1	0	1	0	0	0	0	0	0
Peak1483	2L	9508706	9509019	intron	1.48014	1	0	0	1	1	1	0	0	0	1	0	0	0	0	1	0	1	1	0	0	0	0	1	0	0	0	0	0
Peak1486	2L	9567623	9567937	intergenic	0.810577	1	0	1	1	0	0	0	0	0	0	0	0	0	0	1	0	0	0	0	0	0	0	0	0	0	0	0	0
Peak1490	2L	9570158	9570691	promoter	0.634045	1	0	1	1	1	0	0	1	0	1	1	0	1	0	0	0	0	0	1	1	0	1	0	0	0	0	0	0
Peak1493	2L	9577158	9577458	intergenic	0.515331	1	0	1	1	1	0	0	0	0	1	1	1	1	0	1	1	1	0	1	1	1	1	0	0	1	0	1	0
Peak1495	2L	9582892	9583308	intergenic	1.93066	1	0	1	1	1	0	0	0	0	1	1	0	1	0	1	1	0	1	1	1	0	1	0	0	0	0	0	0
Peak1496	2L	9583378	9583665	intergenic	1.26652	1	1	1	1	0	1	0	0	0	0	0	0	0	0	0	0	0	0	0	0	0	0	0	0	0	0	0	0
Peak1497	2L	9584328	9584643	intergenic	1.36853	1	0	1	0	0	0	0	0	0	0	1	0	0	0	0	1	0	0	0	1	0	0	0	0	0	0	0	0
Peak1498	2L	9585158	9585506	intergenic	1.83141	1	0	1	0	0	0	0	1	0	1	1	0	1	0	0	0	0	0	0	1	0	0	0	0	0	0	0	0
Peak1499	2L	9587164	9587477	intergenic	0.990547	1	0	1	0	0	0	0	0	0	0	0	0	0	1	0	0	0	0	0	0	0	0	0	0	0	0	0	0
Peak1500	2L	9601243	9601650	intergenic	0.765883	1	0	1	0	0	0	0	0	0	0	0	0	0	0	0	0	0	0	0	0	0	1	0	0	0	0	0	0
Peak1501	2L	9601986	9602487	intergenic	0.780807	1	1	1	1	0	0	0	0	0	0	0	0	0	0	0	0	0	0	0	0	0	0	0	1	0	0	0	0
Peak1508	2L	9705129	9706194	promoter	0.437364	1	0	0	0	0	0	0	0	0	0	0	0	1	0	0	0	0	1	0	0	0	1	0	0	0	0	1	0
Peak1514	2L	9782256	9782475	promoter	0.807634	1	1	0	0	0	0	1	0	0	0	0	0	1	0	1	1	1	1	0	0	0	1	0	0	1	0	1	0
Peak1529	2L	9946052	9946278	intron	1.35561	1	1	1	0	0	0	0	0	0	1	1	0	1	0	1	1	1	1	1	1	0	1	0	0	0	0	0	0
Peak1536	2L	9969256	9970000	intergenic	0.480955	1	0	1	0	0	0	0	0	0	1	1	0	1	0	1	0	0	0	1	1	0	1	0	0	0	0	0	0
Peak1537	2L	9970438	9970745	intergenic	1.26862	1	0	1	0	0	0	0	0	0	1	1	0	1	0	1	0	0	1	1	1	0	1	0	0	0	0	0	0
Peak1546	2L	9996839	9997321	CDS	0.410437	1	0	1	0	0	0	0	0	0	0	1	0	0	0	0	0	0	0	0	1	0	1	0	0	0	0	0	0
Peak1554	2L	10180163	10180659	promoter	0.524616	1	0	1	0	0	0	0	0	0	1	1	0	1	0	1	1	0	0	1	0	0	0	1	1	1	0	0	0
Peak1560	2L	10208914	10209238	intron	0.548889	1	1	1	0	0	0	0	0	0	1	1	0	1	0	0	1	0	1	1	1	0	1	0	0	0	0	0	0
Peak1561	2L	10215085	10215377	CDS	0.596899	1	1	1	1	1	1	1	0	0	1	1	1	1	0	1	1	1	1	1	1	1	1	0	0	0	0	0	0
Peak1581	2L	10259916	10260355	promoter	0.697099	1	0	1	0	0	0	0	0	0	0	0	0	0	0	0	0	0	0	0	1	0	0	0	0	0	0	0	0
Peak1595	2L	10314271	10314530	promoter	0.413695	1	0	1	0	0	0	0	0	0	0	0	0	0	0	0	0	0	0	0	1	0	0	0	0	0	0	0	0
Peak1596	2L	10315639	10315913	CDS	0.667132	1	1	1	0	1	1	1	0	0	1	1	1	1	0	1	1	1	1	1	1	1	1	0	1	1	0	0	0
Peak1626	2L	10397990	10398722	promoter	0.567553	1	0	1	1	0	1	0	0	0	0	0	0	0	0	1	0	0	0	0	0	0	0	0	0	0	0	0	0
Peak1648	2L	10440079	10440343	CDS	0.586825	1	0	1	0	0	0	0	0	0	0	0	0	0	0	0	0	0	0	0	1	0	0	0	0	0	0	0	0
Peak1650	2L	10483070	10483804	promoter	0.727242	1	0	0	1	0	0	0	0	0	0	0	0	0	0	0	0	0	0	0	0	0	0	0	0	0	0	0	0
Peak1653	2L	10505971	10506267	intron	1.09363	1	0	0	0	1	0	0	0	0	1	1	0	0	0	0	1	0	0	1	1	0	0	0	0	0	0	0	0
Peak1657	2L	10547241	10547783	intron	0.540083	1	0	1	1	1	0	0	0	0	0	0	0	0	0	1	0	0	0	0	0	0	0	0	0	0	0	0	0
Peak1658	2L	10548104	10548484	intron	0.423147	1	0	1	0	0	0	0	0	0	0	0	0	0	0	0	0	0	0	0	0	0	0	0	0	0	0	0	0
Peak1662	2L	10609774	10610002	intron	1.25609	1	1	1	0	0	1	0	0	0	0	1	0	1	0	0	0	0	1	0	0	0	1	0	0	0	0	0	0
Peak1663	2L	10610326	10610582	intron	0.934319	1	0	0	0	0	0	0	0	0	0	0	0	0	0	0	0	0	0	0	0	0	0	0	0	0	0	0	0
Peak1668	2L	10663686	10663987	intron	1.55451	1	0	1	0	0	0	0	0	0	0	0	0	0	0	0	0	0	0	0	0	0	0	0	0	0	0	0	0
Peak1696	2L	11059452	11059684	intron	0.843261	1	1	1	1	1	1	1	0	0	1	1	1	1	0	1	1	1	1	1	1	1	1	0	0	1	0	0	0
Peak1697	2L	11061001	11061513	intron	0.528878	1	1	1	0	0	0	0	0	0	0	1	0	0	0	1	1	0	0	1	1	0	0	0	0	0	0	0	0
Peak1698	2L	11065637	11065992	intron	0.692157	1	0	1	1	1	0	0	1	0	1	1	1	1	0	1	1	0	1	1	1	1	1	0	0	0	0	0	0
Peak1700	2L	11070818	11071471	promoter	0.663928	1	0	1	0	0	0	0	1	0	0	1	0	0	1	1	0	0	0	0	1	0	0	0	0	0	0	0	0
Peak1701	2L	11071590	11072304	intergenic	0.617942	1	0	1	0	0	0	0	0	0	0	0	0	0	0	0	0	0	0	0	1	0	0	0	0	0	0	0	0
Peak1702	2L	11074264	11074519	intergenic	0.665747	1	0	1	0	0	0	0	0	0	0	1	0	0	1	1	0	0	0	0	1	0	0	1	0	0	0	1	0
Peak1703	2L	11074873	11075815	promoter	1.00618	1	0	1	0	0	0	0	1	0	1	1	1	1	0	0	0	0	0	0	1	0	0	0	0	0	0	0	0
Peak1711	2L	11175493	11175811	intron	1.03299	1	0	1	1	0	1	0	0	0	0	0	0	0	0	1	0	1	1	0	0	0	0	0	0	0	0	0	0
Peak1713	2L	11184516	11184837	intron	0.803814	1	1	1	0	0	0	0	0	0	0	0	0	1	0	0	0	0	0	1	1	0	1	0	0	0	0	0	0
Peak1714	2L	11185849	11186240	intron	1.36308	1	0	1	0	0	0	0	0	0	0	1	0	0	0	0	0	0	0	0	1	0	1	0	0	0	0	0	0
Peak1716	2L	11190777	11191027	intron	0.955144	1	0	0	0	0	0	0	1	0	0	0	0	0	0	0	0	0	0	0	0	0	0	0	0	0	0	0	0
Peak1717	2L	11193943	11194145	intron	1.55368	1	0	0	0	0	0	0	0	0	0	0	0	1	0	0	0	0	1	0	0	0	1	0	0	0	0	0	0
Peak1718	2L	11194388	11194869	intron	0.848444	1	0	1	0	0	0	0	0	0	0	0	0	0	0	0	0	0	0	0	0	0	0	0	0	0	0	0	0
Peak1721	2L	11214544	11214879	intron	0.919565	1	1	1	0	0	0	0	0	0	0	1	0	0	0	0	1	0	0	0	1	0	0	0	0	0	0	0	0
Peak1723	2L	11224498	11224769	intron	0.793817	1	1	1	1	1	1	1	0	0	1	1	1	1	0	1	1	1	1	1	1	1	1	0	0	0	0	0	0
Peak1724	2L	11225316	11225679	intron	0.53486	1	0	0	1	1	0	0	0	0	1	0	0	0	0	0	0	0	0	0	0	0	0	0	0	0	0	0	0
Peak1726	2L	11243632	11243999	intron	0.758926	1	1	1	0	1	1	0	0	0	1	1	0	1	1	1	1	0	0	1	1	0	1	0	1	0	1	1	0
Peak1730	2L	11343846	11344347	intergenic	1.32471	1	1	1	0	1	1	0	0	0	1	1	0	1	1	1	1	0	1	1	1	0	1	0	1	0	1	1	0
Peak1731	2L	11358278	11359051	promoter	0.600361	1	1	1	1	0	0	0	0	0	0	1	0	0	0	0	0	0	0	0	1	0	0	1	0	0	0	0	0
Peak1732	2L	11400726	11401040	intergenic	0.635134	1	0	0	0	0	0	0	0	0	0	0	0	0	0	0	0	0	1	0	0	0	0	0	0	0	0	1	0
Peak1734	2L	11418734	11419217	intergenic	0.679197	1	0	0	0	0	0	0	0	0	0	0	0	0	1	0	0	0	0	0	1	0	0	0	0	0	0	0	0
Peak1735	2L	11432984	11433829	intergenic	1.62387	1	1	1	0	0	1	0	0	0	1	1	1	1	0	1	1	1	1	1	0	0	1	0	0	0	0	0	0
Peak1736	2L	11436785	11437026	CDS	1.86657	1	0	1	0	0	0	0	0	0	0	0	0	0	0	0	0	0	0	0	0	0	0	0	0	0	0	0	0
Peak1737	2L	11440067	11440273	CDS	2.22125	1	0	1	0	0	0	0	0	0	0	0	0	1	0	0	0	0	1	0	0	0	1	0	0	1	0	0	0
Peak1738	2L	11440637	11441157	intron	1.23538	1	0	0	0	0	0	1	1	0	1	1	1	1	0	1	0	0	1	1	1	0	1	0	0	0	0	0	0
Peak1741	2L	11452535	11453512	intergenic	1.06098	1	0	0	0	0	0	0	0	0	0	0	0	0	0	1	0	0	0	0	0	0	0	0	0	0	0	0	0
Peak1742	2L	11455139	11456240	intergenic	1.73351	1	1	1	0	0	0	0	0	0	0	0	0	0	0	0	1	0	0	1	1	0	1	0	0	0	0	0	0
Peak1748	2L	11482439	11482927	intergenic	0.871434	1	0	0	0	0	0	0	0	0	0	1	0	1	0	0	0	0	1	0	0	0	1	0	0	0	0	0	0
Peak1750	2L	11485852	11487641	promoter	0.696215	1	0	0	0	0	0	0	0	0	0	0	0	0	0	0	0	0	0	0	0	0	0	0	0	0	0	1	0
Peak1756	2L	11756759	11756984	intergenic	1.16102	1	0	1	0	0	0	0	0	0	0	0	0	0	1	1	0	0	0	0	1	1	0	1	0	0	0	0	0
Peak1757	2L	11793539	11794359	promoter	0.507849	1	0	0	0	0	0	0	0	0	0	0	0	0	0	0	0	0	0	0	0	0	0	0	0	0	0	0	0
Peak1769	2L	11967738	11968432	intergenic	0.807075	1	0	1	1	1	1	0	0	0	1	0	0	0	0	0	0	0	0	0	0	0	0	0	0	0	0	0	0
Peak1774	2L	11973225	11973640	intergenic	0.5686	1	0	0	0	1	0	0	0	0	1	0	0	0	0	0	0	0	0	0	0	0	0	0	0	1	0	0	0
Peak1781	2L	12006428	12006711	intergenic	0.420617	1	0	0	0	0	0	0	0	0	0	0	0	1	0	0	0	0	1	0	0	0	1	0	0	0	0	0	0
Peak1783	2L	12009902	12012741	intergenic	0.525668	1	1	0	1	0	0	0	0	0	0	0	0	0	0	0	0	0	0	0	0	0	0	0	0	0	0	0	0
Peak1786	2L	12038366	12038631	promoter	0.391362	1	0	1	0	0	0	0	0	0	0	0	0	0	0	0	0	0	0	0	0	0	0	0	0	0	0	0	0
Peak1795	2L	12079600	12080545	intergenic	0.594002	1	0	1	1	0	0	0	1	0	0	1	0	0	1	1	0	0	1	0	0	0	0	1	0	0	0	1	0
Peak1796	2L	12080874	12081817	intergenic	0.958926	1	0	0	1	1	0	0	0	0	1	1	1	1	0	1	0	0	0	1	1	0	1	0	0	0	0	0	0
Peak1797	2L	12082365	12086201	promoter	0.525408	1	0	1	1	0	0	0	1	0	0	0	0	0	1	1	0	0	1	0	1	0	0	1	0	0	0	0	0
Peak1798	2L	12087092	12087978	intergenic	0.831754	1	1	1	1	1	1	0	0	0	1	1	1	1	0	1	1	1	1	1	1	1	1	0	0	0	0	0	0
Peak1800	2L	12089045	12089860	intergenic	1.8171	1	1	1	0	1	0	0	0	0	1	1	1	1	0	1	1	1	1	1	1	1	1	0	0	0	0	0	0
Peak1801	2L	12091794	12092352	promoter	1.16024	1	1	1	0	0	0	0	0	0	0	1	0	0	0	0	1	0	0	0	1	0	0	1	0	0	0	0	0
Peak1802	2L	12092462	12093291	intron	0.673452	1	1	1	0	0	0	0	0	0	1	1	1	1	0	1	1	1	1	0	0	0	0	0	0	0	0	0	0
Peak1829	2L	12461081	12461914	promoter	0.283421	1	0	1	0	0	1	0	0	0	0	0	0	0	0	0	0	0	0	0	1	0	0	0	0	0	0	0	0
Peak1830	2L	12466487	12467004	intron	0.419543	1	0	0	0	0	0	0	0	0	0	0	0	0	0	1	0	0	0	0	0	0	0	0	0	0	0	0	0
Peak1831	2L	12469206	12469537	intron	0.683176	1	0	0	0	0	0	0	0	0	0	0	0	0	0	0	0	0	0	0	0	0	0	0	0	0	0	0	0
Peak1841	2L	12509830	12510457	intron	0.574085	1	0	0	1	0	1	1	0	0	1	0	0	1	0	1	0	1	1	1	0	0	1	0	0	0	0	0	0
Peak1844	2L	12516264	12516754	CDS	0.609421	1	1	1	0	0	0	0	0	0	0	1	0	1	0	1	1	1	1	1	1	1	1	0	0	0	0	0	0
Peak1845	2L	12520231	12520742	intron	0.556961	1	0	0	0	0	0	0	0	0	0	0	0	1	0	0	0	0	1	0	0	0	1	0	0	0	0	0	0
Peak1852	2L	12539226	12539606	CDS	0.787801	1	0	1	1	0	0	0	0	0	0	0	0	0	0	1	0	0	0	0	0	0	0	1	0	0	0	0	0
Peak1862	2L	12607309	12607791	intron	0.889997	1	0	1	1	0	0	0	0	0	0	0	0	0	0	1	0	0	0	0	0	0	0	0	0	0	0	0	0
Peak1863	2L	12611786	12612193	intron	0.776814	1	0	1	0	0	0	0	0	0	0	0	0	0	1	0	0	0	0	1	1	0	1	0	0	0	0	0	0
Peak1864	2L	12614770	12615135	intron	1.37447	1	0	1	0	0	0	0	1	0	1	1	0	1	1	0	0	0	0	1	1	0	1	0	0	0	0	0	0
Peak1865	2L	12615966	12616401	intron	2.34546	1	0	1	1	1	0	0	0	0	0	0	0	0	0	1	0	0	0	0	0	0	0	0	0	0	0	0	0
Peak1866	2L	12616487	12617119	intron	2.06407	1	1	1	1	1	0	0	0	0	0	0	0	0	0	0	0	0	0	0	0	0	0	0	0	0	0	0	0
Peak1867	2L	12618058	12619124	promoter	1.05199	1	0	1	1	1	1	0	1	0	1	1	1	1	0	1	1	0	0	1	1	1	1	0	0	0	0	0	0
Peak1868	2L	12621503	12621814	intron	1.39788	1	1	1	1	1	1	0	0	0	1	1	1	1	0	1	1	1	1	1	1	1	1	0	0	0	0	0	0
Peak1869	2L	12622024	12622320	intron	1.31843	1	1	1	0	1	0	0	0	0	0	0	0	1	0	1	0	0	1	0	0	0	0	0	0	1	0	1	0
Peak1870	2L	12622606	12622896	intron	1.29766	1	0	1	0	0	0	0	0	0	0	0	0	0	0	0	0	0	0	0	1	0	0	0	0	0	0	0	0
Peak1871	2L	12623045	12623476	intron	1.03375	1	0	1	0	0	0	0	0	0	1	1	0	1	0	0	1	0	0	1	1	0	1	0	0	0	0	0	0
Peak1872	2L	12625074	12625339	intron	1.57077	1	0	0	1	1	1	0	0	0	0	0	1	0	0	1	0	1	0	0	0	0	0	0	0	0	0	0	0
Peak1873	2L	12632656	12633338	intron	0.652206	1	1	1	0	1	1	0	0	0	1	1	1	1	0	1	1	1	1	1	1	1	1	0	0	0	0	0	0
Peak1875	2L	12662565	12663220	intron	1.16336	1	1	1	0	0	0	0	0	0	1	1	0	1	0	1	1	1	1	1	1	1	1	0	0	0	0	0	0
Peak1876	2L	12665939	12666762	intron	0.60468	1	1	1	0	0	1	0	0	0	1	1	1	1	0	1	1	1	1	1	1	1	1	0	0	0	0	0	0
Peak1881	2L	12682774	12683108	intron	0.563818	1	0	1	0	0	0	0	0	0	0	1	0	0	0	0	0	0	0	0	1	0	0	0	0	0	0	0	0
Peak1889	2L	12724063	12724298	intron	1.48764	1	0	0	0	0	0	0	0	0	0	1	0	1	0	0	0	0	0	0	1	0	1	0	0	0	0	0	0
Peak1890	2L	12730612	12731064	CDS	0.639204	1	1	1	1	0	0	0	0	0	0	0	0	0	0	0	1	0	1	0	1	0	1	0	0	0	0	0	0
Peak1891	2L	12822688	12823090	promoter	0.491684	1	1	1	0	0	0	0	0	0	1	1	0	1	0	1	1	0	1	1	1	0	1	0	0	1	0	0	0
Peak1893	2L	12893974	12894255	intergenic	1.34729	1	0	1	0	0	0	0	0	0	0	0	0	0	0	0	0	0	0	0	0	0	0	0	0	0	0	0	0
Peak1904	2L	13198377	13198644	CDS	0.83628	1	0	1	0	1	0	0	0	0	0	1	0	0	0	0	1	0	0	1	1	0	0	0	0	0	1	1	0
Peak1909	2L	13214196	13214625	CDS	1.00408	1	1	1	0	0	1	0	0	0	1	1	1	1	0	1	1	1	1	1	1	1	1	0	0	0	0	0	0
Peak1919	2L	13229263	13230423	promoter	0.512137	1	0	1	0	0	1	0	0	0	1	1	0	0	0	0	0	1	0	1	1	0	0	0	1	0	1	1	0
Peak1920	2L	13233931	13235479	promoter	0.467833	1	0	1	0	1	1	1	0	0	0	1	0	0	0	1	1	0	0	1	1	0	0	0	1	1	1	1	0
Peak1923	2L	13247221	13247499	intron	0.738516	1	1	1	0	0	0	0	0	0	1	0	0	1	0	1	1	1	1	1	0	0	1	0	0	0	0	1	0
Peak1940	2L	13515384	13515700	intron	0.585302	1	1	0	0	1	0	1	0	0	0	0	0	1	0	0	0	1	1	0	0	0	1	0	0	1	0	1	0
Peak1942	2L	13517295	13517515	intron	0.763526	1	1	1	0	0	0	0	0	0	1	1	0	1	0	1	1	0	1	1	1	0	1	0	0	0	0	0	0
Peak1952	2L	13583335	13583536	intron	1.30185	1	0	1	0	0	0	0	0	0	0	0	0	0	1	0	0	0	0	1	1	0	1	0	0	0	0	0	0
Peak1967	2L	13811426	13811639	promoter	0.44633	1	0	1	0	0	0	0	0	0	0	1	0	0	0	0	1	0	0	0	1	0	0	1	0	0	0	1	0
Peak1973	2L	13837596	13837984	intron	0.509755	1	0	0	0	0	0	0	0	0	0	0	0	0	0	1	0	0	0	0	0	0	0	0	0	0	0	0	0
Peak1974	2L	13850637	13850893	intron	0.738365	1	0	1	0	0	1	0	0	0	0	0	0	0	0	0	0	0	0	0	1	0	0	0	0	0	0	0	0
Peak1975	2L	13851028	13851693	intron	0.667729	1	1	1	1	1	1	0	0	0	1	1	1	1	0	1	1	1	1	1	1	1	1	0	0	0	0	0	0
Peak1976	2L	13863480	13863844	intron	1.23454	1	0	1	0	1	1	0	0	0	1	1	1	1	0	0	1	0	0	1	1	1	1	0	0	0	0	0	0
Peak1977	2L	13863916	13864075	intron	1.13813	1	0	0	0	1	0	0	0	0	1	1	0	0	0	0	0	0	0	0	1	0	0	0	0	0	0	0	0
Peak1978	2L	13865609	13866004	intron	0.996617	1	0	1	0	1	0	0	0	0	1	1	0	1	0	0	1	0	0	1	1	0	1	0	0	0	0	0	0
Peak1979	2L	13867589	13868151	intron	0.870415	1	0	0	0	0	0	0	0	0	1	1	0	1	0	0	0	0	0	1	1	0	0	0	0	0	0	0	0
Peak1980	2L	13869358	13869886	intron	0.64174	1	0	1	0	1	0	0	0	0	1	1	0	1	0	0	1	0	0	1	1	0	0	0	0	0	0	0	0
Peak1981	2L	13878030	13878405	intron	0.70302	1	0	1	1	1	0	0	0	0	1	1	1	1	0	1	1	1	1	1	1	0	0	0	0	0	0	0	0
Peak1984	2L	13885892	13886188	intron	1.5329	1	1	1	0	0	0	0	0	0	0	1	0	1	0	1	1	0	1	1	1	0	1	0	0	0	0	0	0
Peak1985	2L	13887032	13887344	intron	1.36442	1	0	1	0	0	1	0	1	0	1	1	1	1	0	0	0	1	0	0	0	0	0	0	1	0	1	0	1
Peak1986	2L	13887932	13888369	intron	1.00157	1	0	0	0	0	0	0	1	0	1	1	0	1	1	0	0	0	0	0	1	0	0	0	0	0	0	0	0
Peak1998	2L	14025729	14026095	intergenic	0.713401	1	0	0	0	0	0	0	1	0	1	1	0	1	1	0	0	0	0	0	0	0	0	0	0	0	0	0	0
Peak2000	2L	14027687	14028043	CDS	0.851502	1	1	1	0	0	0	0	0	0	0	1	0	1	0	1	1	1	1	0	1	0	1	0	0	1	0	0	0
Peak2001	2L	14039995	14040776	promoter	1.044	1	1	1	0	0	0	0	0	0	1	1	0	1	0	1	1	0	1	0	0	0	0	0	0	0	0	0	0
Peak2002	2L	14045749	14046018	intron	0.617529	1	0	1	1	1	1	0	1	0	1	1	1	0	0	1	1	1	0	1	1	0	0	0	0	1	0	1	1
Peak2003	2L	14046077	14046376	intron	0.849734	1	1	1	0	0	1	0	0	0	1	1	1	1	0	1	1	1	1	0	0	0	1	0	0	1	0	0	0
Peak2004	2L	14047110	14047819	promoter	0.449071	1	0	1	0	1	0	0	0	0	1	1	0	0	0	1	1	0	0	1	1	0	0	0	0	1	0	1	0
Peak2009	2L	14193327	14193549	intron	0.48725	1	1	1	1	1	1	0	1	0	1	1	1	1	0	1	1	1	1	0	1	0	0	0	0	0	0	0	0
Peak2010	2L	14197272	14197460	intron	0.719657	1	0	1	1	1	0	0	0	0	1	1	0	0	0	1	1	0	0	1	1	0	0	0	0	1	0	1	0
Peak2016	2L	14252756	14253417	intergenic	0.928415	1	0	1	0	1	1	0	0	0	1	1	0	0	1	0	1	1	1	1	1	0	0	0	1	1	1	1	0
Peak2017	2L	14253980	14254310	intergenic	0.830995	1	0	0	0	0	0	0	0	0	0	0	0	0	0	0	0	0	0	0	0	0	0	0	0	0	0	0	0
Peak2018	2L	14260873	14261539	intergenic	1.37507	1	0	0	0	0	0	0	0	0	0	0	0	0	0	0	0	1	0	0	0	0	0	0	0	0	0	0	0
Peak2021	2L	14264919	14265480	intron	0.475911	1	1	1	0	1	0	0	0	0	1	1	1	1	0	1	1	1	1	1	1	1	1	0	0	0	0	0	0
Peak2026	2L	14308652	14309088	CDS	0.49548	1	1	1	0	0	0	0	0	0	0	1	0	1	0	0	1	0	1	1	1	0	1	0	0	0	0	0	0
Peak2032	2L	14429730	14430848	intergenic	1.65223	1	0	0	0	0	0	0	0	0	0	0	0	0	0	0	0	0	0	0	0	0	0	0	0	0	0	0	0
Peak2033	2L	14431310	14431922	intergenic	0.861655	1	0	0	0	0	0	0	0	0	0	0	0	0	0	0	0	0	0	0	1	0	0	0	0	0	0	0	0
Peak2034	2L	14434589	14434835	intergenic	0.891843	1	1	1	0	1	0	0	0	0	1	1	1	1	0	1	1	1	1	1	1	1	1	0	0	0	0	1	0
Peak2036	2L	14439767	14440118	intergenic	1.30706	1	1	1	0	0	1	1	0	0	1	1	1	1	0	1	1	1	1	1	1	1	1	0	0	0	0	0	0
Peak2037	2L	14440377	14440927	intergenic	0.859123	1	1	1	1	0	0	0	0	0	0	0	0	0	0	0	0	0	0	0	0	0	0	0	0	0	0	0	0
Peak2038	2L	14442533	14442791	intergenic	0.961049	1	0	0	0	0	0	0	0	0	0	0	0	0	0	0	0	0	0	0	0	0	0	0	0	0	0	0	0
Peak2039	2L	14443625	14444414	intergenic	0.329722	1	0	0	1	0	0	0	0	0	0	0	0	0	0	1	0	0	1	0	0	0	0	1	0	0	0	0	0
Peak2040	2L	14445463	14446795	intergenic	0.436658	1	0	0	0	0	0	0	1	0	0	0	0	0	0	1	0	0	1	0	0	0	0	0	0	0	0	0	0
Peak2041	2L	14447516	14447859	intergenic	1.51903	1	0	1	1	1	0	0	1	0	1	1	1	1	1	1	1	0	0	1	1	1	1	0	0	0	0	0	0
Peak2042	2L	14459368	14459862	intergenic	1.28497	1	0	1	0	0	0	0	1	0	0	1	0	0	0	1	0	0	1	0	1	0	0	1	0	0	0	1	0
Peak2043	2L	14461450	14462108	intergenic	0.664887	1	1	1	1	1	1	1	0	0	1	1	1	1	0	1	1	1	1	1	1	1	1	0	0	0	0	0	0
Peak2044	2L	14464624	14465270	intergenic	0.601514	1	1	1	0	0	0	0	0	0	0	0	0	1	0	0	0	0	1	0	0	0	1	0	0	1	0	1	0
Peak2046	2L	14477897	14478144	intergenic	1.62089	1	0	1	0	0	1	0	0	0	0	0	0	0	1	0	0	1	0	0	0	0	1	0	0	0	0	0	0
Peak2047	2L	14479900	14480214	intergenic	0.984506	1	0	1	1	0	0	0	0	0	0	0	0	0	1	1	0	0	1	0	0	0	0	0	0	0	0	0	0
Peak2048	2L	14483379	14483883	intergenic	1.43005	1	0	1	0	0	0	0	0	0	0	1	0	0	0	0	0	0	0	0	1	0	0	1	0	0	0	0	0
Peak2049	2L	14484863	14485502	intergenic	0.622002	1	0	0	0	0	0	0	0	0	0	1	0	0	0	0	1	0	0	0	1	0	0	0	0	0	0	0	0
Peak2050	2L	14485733	14486807	intergenic	0.706477	1	0	0	0	0	0	0	0	0	0	1	0	1	0	0	0	0	0	0	0	0	0	0	0	0	0	0	0
Peak2051	2L	14489025	14489612	intergenic	0.470802	1	0	0	0	0	0	0	0	0	0	0	0	0	0	0	0	0	0	0	0	0	0	0	0	0	0	0	0
Peak2053	2L	14491659	14493174	CDS	0.796833	1	1	1	0	0	0	0	0	0	1	1	0	1	0	1	1	0	1	0	1	0	0	0	0	0	0	0	0
Peak2055	2L	14497681	14498248	intergenic	1.20766	1	0	1	0	0	0	0	0	0	0	0	0	0	0	0	0	0	0	0	1	0	0	0	0	0	0	0	0
Peak2057	2L	14508589	14509281	intergenic	0.282987	1	0	1	0	1	0	0	0	0	1	1	0	0	0	1	1	0	0	1	1	0	0	0	0	0	0	0	0
Peak2062	2L	14518942	14519271	intergenic	0.79111	1	1	1	1	1	1	0	0	0	1	1	1	1	0	1	1	1	1	1	1	1	1	0	0	0	0	0	0
Peak2063	2L	14519690	14520052	intergenic	0.637662	1	1	1	0	0	1	0	0	0	1	1	1	1	0	1	1	1	1	1	1	1	1	0	0	0	0	0	0
Peak2066	2L	14540162	14540473	intergenic	0.612485	1	0	0	0	0	0	0	0	0	0	0	0	0	0	0	0	0	0	0	0	0	0	0	0	0	0	0	0
Peak2069	2L	14557617	14557912	intergenic	0.592874	1	0	1	0	0	0	0	0	0	0	0	0	0	0	1	0	0	0	0	0	0	0	0	0	0	0	0	0
Peak2070	2L	14558020	14558250	intergenic	0.900269	1	0	1	0	0	0	0	0	0	0	1	0	0	0	0	0	0	0	0	1	0	0	0	0	0	0	1	0
Peak2072	2L	14577205	14577628	intergenic	1.09983	1	1	1	0	0	0	0	0	0	0	0	0	0	0	0	0	0	1	0	1	0	1	0	0	0	0	0	0
Peak2073	2L	14585146	14585518	intergenic	0.910167	1	1	1	0	1	1	1	0	0	1	0	1	1	0	1	0	1	1	1	0	1	1	1	0	1	1	1	0
Peak2078	2L	14623806	14624046	intron	0.670843	1	0	0	1	1	0	0	0	0	0	0	0	0	0	1	0	0	0	0	0	0	0	0	0	0	0	0	0
Peak2079	2L	14662863	14663098	intron	0.669319	1	0	1	0	0	0	0	0	0	1	1	0	1	0	0	0	0	0	0	1	0	1	0	0	0	0	0	0
Peak2080	2L	14683707	14683976	intron	1.21436	1	1	1	0	0	1	0	0	0	1	1	1	1	0	1	1	1	1	1	1	1	1	0	1	1	1	1	0
Peak2081	2L	14684785	14685134	intron	0.829737	1	0	0	0	0	0	0	0	0	0	0	0	0	0	0	0	0	0	0	0	0	0	0	0	0	0	0	0
Peak2088	2L	15008618	15009458	CDS	0.573135	1	0	0	0	0	0	0	0	0	0	0	0	0	0	1	0	0	1	0	0	0	0	0	0	0	0	0	0
Peak2094	2L	15038441	15040380	promoter	0.281466	1	0	1	1	1	1	0	0	0	1	1	1	1	0	1	1	1	1	1	1	1	1	0	0	0	0	0	0
Peak2095	2L	15042060	15042733	CDS	0.644671	1	0	1	0	0	0	0	0	0	1	0	1	1	1	1	0	1	1	1	0	1	1	0	0	0	0	0	0
Peak2102	2L	15109252	15109508	promoter	0.515338	1	0	1	1	1	1	1	0	0	1	1	1	1	0	1	1	1	1	1	1	1	1	0	0	0	0	0	0
Peak2110	2L	15310943	15311491	intergenic	0.778473	1	0	1	1	1	0	0	0	0	1	1	0	1	0	1	1	0	1	1	1	0	1	0	0	0	0	0	0
Peak2111	2L	15313513	15314105	intergenic	0.709446	1	0	0	0	0	0	0	0	0	1	1	0	1	0	1	0	0	1	1	0	0	1	0	0	0	0	0	0
Peak2112	2L	15319529	15320342	intergenic	0.633321	1	0	0	0	0	0	0	0	0	0	0	0	0	0	0	0	0	0	0	0	0	0	0	0	0	0	0	0
Peak2113	2L	15323141	15323699	intergenic	0.639744	1	0	0	0	0	0	0	0	0	0	0	1	1	0	0	0	1	1	0	0	0	1	0	0	0	0	0	0
Peak2114	2L	15324180	15325353	intergenic	0.424515	1	0	1	1	1	0	1	1	0	1	1	1	1	0	1	1	0	1	1	1	1	1	0	0	0	0	0	0
Peak2115	2L	15325848	15326371	intergenic	1.01727	1	0	1	0	0	0	0	0	0	0	1	0	1	0	0	0	0	0	0	1	0	1	0	0	0	0	0	0
Peak2121	2L	15370345	15370940	intergenic	0.882938	1	0	0	0	0	0	0	0	0	0	0	0	0	0	0	0	0	0	0	0	0	0	0	0	0	0	0	0
Peak2123	2L	15458401	15458607	intergenic	0.493674	1	0	0	0	0	0	0	0	0	0	0	0	0	0	0	0	0	0	0	0	0	0	0	0	0	0	0	0
Peak2125	2L	15470671	15471237	intergenic	0.868409	1	1	1	0	0	0	0	0	0	0	0	0	1	0	0	0	0	1	0	1	0	1	0	0	0	0	0	0
Peak2129	2L	15476741	15478862	promoter	0.254265	1	0	0	1	1	1	0	0	0	1	1	1	1	0	1	1	0	1	1	1	0	1	0	0	0	0	0	0
Peak2130	2L	15479191	15480436	intergenic	0.38869	1	1	1	0	0	0	0	0	0	0	0	0	1	0	1	1	1	1	1	1	0	1	0	0	0	0	0	0
Peak2131	2L	15480604	15481052	intergenic	0.806869	1	0	0	0	0	0	0	0	0	0	0	0	0	0	0	0	0	0	0	0	0	0	0	0	0	0	0	0
Peak2133	2L	15482753	15483047	intergenic	0.71216	1	1	1	1	1	1	1	0	0	1	1	1	1	0	1	1	1	1	1	1	1	1	0	0	0	0	0	0
Peak2134	2L	15485578	15486654	intergenic	0.353795	1	1	1	0	0	1	0	0	0	1	1	1	1	0	1	1	1	1	1	1	1	1	0	0	0	0	0	0
Peak2135	2L	15486745	15486998	intergenic	0.664273	1	0	1	1	1	0	1	1	0	1	1	1	1	0	1	1	0	1	1	1	0	1	0	0	0	0	0	0
Peak2139	2L	15537869	15538069	intergenic	0.747258	1	1	1	1	1	0	0	0	0	1	1	1	1	0	1	1	1	1	1	1	0	1	0	0	0	0	0	0
Peak2141	2L	15728741	15730902	CDS	0.446952	1	1	1	1	1	1	1	0	0	1	1	1	1	0	1	1	1	1	1	1	1	1	0	0	0	0	0	0
Peak2147	2L	15738944	15739336	intron	0.956661	1	0	0	0	0	0	0	0	0	1	0	0	1	0	0	0	0	0	0	0	0	1	0	0	0	0	0	0
Peak2148	2L	15739951	15740230	intron	0.518594	1	0	0	0	0	0	0	0	0	0	0	0	0	0	0	0	0	0	0	0	0	0	0	0	0	0	0	0
Peak2150	2L	15740988	15741476	intron	0.916056	1	1	1	0	0	0	0	0	0	0	0	0	0	0	0	0	0	0	0	1	0	0	0	0	0	0	0	0
Peak2164	2L	15955970	15956290	intron	0.929117	1	0	1	0	0	0	0	0	0	0	0	0	0	0	0	0	0	0	0	0	0	0	0	0	0	0	0	0
Peak2165	2L	15957353	15957590	intron	1.60801	1	0	0	1	1	0	0	0	0	0	0	0	0	0	0	0	0	0	0	0	0	0	0	0	0	0	0	0
Peak2167	2L	16031249	16031582	intron	1.02021	1	0	0	0	0	1	0	0	0	1	0	1	1	0	0	0	0	0	0	0	0	0	0	0	0	0	0	0
Peak2170	2L	16224837	16225064	intergenic	1.11845	1	1	1	0	0	0	0	0	0	1	0	0	1	0	1	1	1	1	1	0	0	1	0	0	0	0	0	0
Peak2171	2L	16225797	16226027	intergenic	1.17741	1	1	0	0	0	0	0	0	0	0	0	0	0	0	0	0	0	0	0	0	0	0	0	0	0	0	0	0
Peak2173	2L	16234843	16235284	intron	0.451769	1	1	1	0	0	1	0	0	0	0	0	0	0	0	0	0	0	0	0	0	0	0	0	0	0	0	0	0
Peak2186	2L	16268032	16268666	intron	0.425679	1	0	0	0	0	0	0	0	0	0	0	0	0	0	0	0	0	0	0	0	0	0	0	0	0	0	0	0
Peak2194	2L	16276025	16276560	intron	0.822555	1	0	0	0	0	0	0	1	0	0	1	0	0	0	0	0	0	0	0	0	0	0	0	0	0	0	0	0
Peak2195	2L	16276799	16277532	intron	0.753971	1	0	0	1	0	0	1	0	0	1	1	0	1	0	1	0	0	1	1	0	0	1	0	0	0	0	1	0
Peak2196	2L	16277742	16278033	intron	0.758652	1	1	1	0	0	0	0	0	0	1	0	0	1	0	1	1	1	1	1	1	0	1	0	0	0	0	0	0
Peak2221	2L	16319598	16320370	intron	0.364616	1	0	0	0	1	0	0	0	0	0	0	0	0	0	0	0	0	0	0	0	0	0	0	0	0	0	0	0
Peak2231	2L	16333590	16334368	CDS	0.635389	1	0	0	0	0	0	0	0	0	0	0	0	0	0	1	0	0	0	0	0	0	0	0	0	0	0	0	0
Peak2237	2L	16405405	16406353	promoter	0.631688	1	0	0	0	0	0	0	0	0	0	0	0	1	0	0	0	0	1	0	0	0	1	0	0	1	0	1	0
Peak2238	2L	16406747	16407200	intron	0.869545	1	0	0	1	1	0	0	1	0	1	1	1	1	0	1	0	0	1	1	1	0	1	0	0	0	0	0	0
Peak2242	2L	16439300	16439560	intron	1.43767	1	1	1	1	1	1	1	0	0	1	1	1	1	0	1	1	1	1	1	1	1	1	0	0	0	0	0	0
Peak2246	2L	16492346	16492681	intron	0.542422	1	0	1	0	0	0	0	0	0	0	1	0	0	0	0	1	0	0	1	1	0	1	0	0	0	0	0	0
Peak2247	2L	16492849	16493057	intron	0.702118	1	0	1	1	0	0	0	0	0	0	0	0	0	0	1	0	0	0	0	1	0	0	1	0	0	0	0	0
Peak2248	2L	16496585	16496875	promoter	0.655362	1	0	1	1	1	1	0	0	0	1	0	0	0	1	1	0	1	0	0	0	0	0	1	0	0	0	0	0
Peak2249	2L	16500421	16500920	intron	0.757996	1	0	0	0	1	0	0	1	0	1	1	0	0	0	0	0	0	0	0	1	0	0	0	0	0	0	0	0
Peak2259	2L	16588555	16588947	intron	0.505507	1	0	0	0	0	0	0	0	0	0	0	0	0	0	0	0	0	0	0	0	0	0	0	0	0	0	0	0
Peak2260	2L	16601401	16602082	promoter	0.591088	1	1	1	0	0	0	0	0	0	0	0	0	0	0	0	0	0	0	0	0	0	0	0	0	0	0	0	0
Peak2261	2L	16602441	16602650	intron	0.952247	1	1	1	1	1	0	0	0	0	1	1	0	1	0	1	1	1	1	1	1	1	1	0	0	0	0	0	0
Peak2267	2L	16686556	16687074	intron	0.843508	1	0	1	1	1	0	0	0	0	1	1	1	1	1	1	1	0	1	1	1	1	1	0	0	0	0	0	0
Peak2280	2L	16746066	16746744	CDS	0.59783	1	0	1	0	0	0	0	0	0	1	1	0	1	0	1	0	0	1	1	1	0	1	0	0	0	0	0	0
Peak2285	2L	16855506	16855714	intron	1.06168	1	0	1	1	0	0	0	0	0	0	0	0	0	0	0	0	0	0	0	0	0	0	0	0	0	0	0	0
Peak2286	2L	16858722	16858928	intergenic	1.14759	1	1	1	0	0	0	0	0	0	0	0	0	0	0	0	1	0	0	0	1	0	0	0	0	0	0	0	0
Peak2287	2L	16859084	16859595	intergenic	0.655298	1	0	1	0	0	0	0	0	0	0	0	0	0	0	0	0	0	0	0	0	0	0	0	0	0	0	0	0
Peak2291	2L	17222061	17222859	intron	0.587098	1	0	1	1	1	0	0	1	0	1	1	0	1	0	0	1	0	0	1	1	0	1	0	0	0	0	0	0
Peak2294	2L	17262271	17263047	intergenic	0.636076	1	0	0	0	1	0	0	0	0	1	1	0	1	0	0	0	0	0	1	1	0	1	0	0	0	0	0	0
Peak2296	2L	17266467	17267174	intergenic	1.03084	1	0	1	1	0	0	0	0	0	0	0	0	0	0	1	0	0	0	0	0	0	0	0	0	0	0	0	0
Peak2297	2L	17267370	17267593	intergenic	1.07068	1	1	0	0	0	1	0	0	0	1	1	1	1	0	1	1	1	1	1	0	0	1	0	0	0	0	0	0
Peak2299	2L	17326893	17327145	intergenic	1.28601	1	0	1	1	1	0	0	0	0	1	1	1	0	0	1	1	0	0	0	1	0	0	0	0	1	0	1	0
Peak2317	2L	17484159	17484614	promoter	0.429307	1	1	1	0	0	1	0	0	0	1	1	1	1	0	1	1	1	0	0	0	0	1	0	0	0	0	0	0
Peak2318	2L	17497190	17497468	promoter	0.798548	1	1	1	1	1	1	0	1	0	1	1	1	1	0	1	1	1	1	0	0	0	0	0	0	0	0	0	0
Peak2320	2L	17564725	17565064	intergenic	1.0058	1	0	1	0	0	0	0	0	0	0	0	0	0	0	1	1	1	1	0	0	0	0	0	0	0	0	0	0
Peak2322	2L	17588209	17588600	intergenic	0.941447	1	0	0	0	0	0	0	0	0	0	0	0	0	0	0	0	0	0	0	0	0	0	0	0	0	0	0	0
Peak2327	2L	17721946	17722217	intron	1.01499	1	1	1	0	0	1	0	0	0	1	1	1	1	0	1	1	1	1	1	1	1	1	0	0	0	0	0	0
Peak2329	2L	17727796	17728059	intron	1.19962	1	0	1	1	1	0	0	1	0	1	1	1	1	0	1	1	0	0	1	1	0	1	0	0	1	0	1	0
Peak2330	2L	17729163	17729413	intron	1.83766	1	0	1	0	0	0	0	0	0	0	0	0	0	0	1	1	1	1	1	1	1	1	0	0	0	0	0	0
Peak2334	2L	17740154	17740989	intron	0.579789	1	1	1	0	0	0	0	0	0	1	1	0	1	0	1	1	1	1	1	1	1	1	0	0	0	0	0	0
Peak2336	2L	17743535	17744236	intron	0.492464	1	1	1	1	1	1	0	0	0	1	1	1	1	0	1	1	1	1	1	1	0	1	0	0	0	0	0	0
Peak2342	2L	17755655	17756021	intron	0.839348	1	0	1	0	0	1	0	0	0	1	1	1	1	0	1	0	0	1	1	1	1	1	0	0	0	0	0	0
Peak2343	2L	17757159	17757401	intron	0.612145	1	1	1	1	0	1	1	0	0	1	1	1	1	0	1	1	1	1	1	1	0	1	0	1	1	1	1	0
Peak2344	2L	17763164	17763441	intron	0.926889	1	1	1	0	0	1	0	0	0	1	1	1	1	0	1	1	1	1	1	1	1	1	0	0	0	0	0	0
Peak2345	2L	17784736	17784939	intergenic	0.63336	1	1	1	0	0	1	0	0	0	1	1	1	1	0	1	1	1	1	1	1	1	1	0	0	0	0	0	0
Peak2347	2L	17951899	17952098	intergenic	0.718909	1	0	1	1	0	1	1	0	0	1	0	1	1	0	1	0	1	1	1	0	1	1	0	1	1	1	1	0
Peak2349	2L	18135471	18136002	CDS	0.525268	1	0	1	0	0	0	0	0	0	0	0	0	1	0	0	0	0	0	0	0	0	1	0	0	0	0	0	0
Peak2353	2L	18141596	18142649	CDS	0.620193	1	1	1	0	1	1	0	1	0	1	1	1	1	0	1	1	1	1	0	0	0	0	0	0	0	0	0	0
Peak2358	2L	18147526	18148307	intron	0.368186	1	0	1	0	0	0	0	0	0	1	1	1	1	0	0	1	1	0	1	1	1	1	0	0	0	0	0	0
Peak2364	2L	18302862	18303144	intergenic	1.02103	1	1	1	0	0	0	1	0	0	1	0	1	1	0	1	1	1	1	1	1	1	1	0	0	1	0	1	0
Peak2365	2L	18305327	18305659	intergenic	0.768778	1	1	1	1	1	1	0	0	0	1	1	1	1	0	1	1	1	1	0	1	0	1	0	1	0	0	0	0
Peak2369	2L	18333767	18334118	intron	0.866397	1	1	1	0	1	1	1	0	0	1	1	1	1	0	1	1	1	1	0	0	0	0	0	0	0	0	0	0
Peak2371	2L	18361207	18361504	intron	0.799578	1	1	1	0	0	1	0	0	0	1	1	1	1	0	1	0	1	1	1	1	1	1	0	0	0	0	0	0
Peak2373	2L	18369469	18369980	intron	1.32955	1	1	1	1	1	1	0	0	0	1	1	1	1	0	1	1	1	1	1	1	1	1	0	1	0	0	0	0
Peak2383	2L	18489771	18490048	CDS	0.657577	1	0	0	0	0	0	0	0	0	1	0	0	1	0	1	0	1	1	1	0	0	1	0	0	0	0	0	0
Peak2385	2L	18523356	18523634	intron	1.09358	1	1	1	0	0	1	1	0	0	1	1	1	1	0	1	1	1	1	0	0	0	1	0	1	1	1	1	0
Peak2389	2L	18596691	18597461	promoter	0.344166	1	1	1	0	0	0	1	0	0	1	1	0	1	0	1	1	0	1	0	1	0	1	0	0	1	0	1	0
Peak2390	2L	18597903	18598759	intergenic	0.519738	1	1	0	1	0	1	1	0	0	1	0	1	1	0	1	1	1	1	1	0	1	1	0	0	1	0	1	0
Peak2391	2L	18598998	18599571	intergenic	0.807867	1	1	1	0	1	1	1	0	0	1	1	1	1	0	1	1	1	1	0	0	0	1	0	1	1	1	1	0
Peak2397	2L	18613117	18613432	intergenic	0.740018	1	0	1	0	0	1	1	0	0	1	1	1	1	0	1	0	1	1	1	0	1	1	0	0	0	1	1	0
Peak2401	2L	18628927	18629554	intron	0.812245	1	1	1	0	1	1	1	0	0	1	0	1	1	0	1	0	1	1	1	0	1	1	0	1	1	1	1	0
Peak2404	2L	18651822	18653387	promoter	0.429698	1	1	1	0	0	1	1	0	0	1	0	1	1	0	1	0	1	1	1	0	1	1	0	1	1	1	1	0
Peak2423	2L	18774746	18774978	intron	0.623227	1	1	1	0	0	1	1	0	0	1	0	1	1	0	1	0	1	1	1	0	1	1	0	1	1	1	1	0
Peak2425	2L	18778478	18779165	intron	1.25003	1	1	1	0	0	0	1	0	0	0	0	0	1	0	1	0	1	1	1	0	1	1	0	0	1	0	1	0
Peak2429	2L	18801713	18802186	intergenic	1.05958	1	1	1	0	1	1	1	0	0	1	0	1	1	0	1	0	1	1	1	0	1	1	1	1	1	1	1	0
Peak2430	2L	18802557	18802839	intergenic	0.573397	1	1	1	0	1	1	1	0	0	1	0	1	1	0	1	0	1	1	0	0	0	1	1	1	1	1	1	0
Peak2431	2L	18807834	18808285	intergenic	1.26682	1	0	1	0	0	0	0	0	0	0	0	0	1	0	0	0	0	1	0	0	0	1	0	0	1	0	1	0
Peak2432	2L	18808741	18809099	intergenic	0.843554	1	1	1	0	0	1	1	0	0	1	1	1	1	0	1	1	1	1	1	1	1	1	0	0	1	1	1	0
Peak2452	2L	18894586	18895885	intergenic	0.36049	1	0	0	0	0	0	1	0	0	0	0	0	1	0	0	0	1	1	0	0	0	1	0	0	1	0	1	0
Peak2453	2L	18897686	18898101	intergenic	0.466754	1	1	1	0	1	0	1	0	0	1	0	0	1	0	1	0	0	1	0	0	0	1	1	0	1	1	1	1
Peak2454	2L	18917631	18918036	intron	0.696985	1	0	1	0	1	1	1	0	0	0	0	0	1	0	0	1	0	1	0	0	0	1	1	0	1	0	1	1
Peak2455	2L	18921005	18921339	intron	1.80296	1	1	1	0	1	1	1	0	0	1	0	0	1	0	1	0	0	1	0	0	0	1	0	0	1	0	1	1
Peak2456	2L	18924379	18925086	intron	0.787659	1	0	0	0	1	1	1	0	0	0	0	0	1	0	0	0	0	1	0	0	0	1	0	0	1	0	1	1
Peak2457	2L	18925972	18926350	intron	0.592951	1	1	1	0	1	1	1	0	0	0	0	0	1	0	0	0	0	1	0	0	0	1	1	1	1	0	1	1
Peak2463	2L	18947255	18948100	intergenic	0.431324	1	0	0	1	1	1	0	0	0	1	1	1	1	0	1	1	1	1	1	1	1	1	0	0	0	0	0	0
Peak2471	2L	18976798	18977214	CDS	0.602373	1	0	0	0	0	1	1	0	0	1	1	1	1	0	1	0	1	1	0	0	0	1	0	0	0	0	1	0
Peak2475	2L	18989976	18990258	promoter	1.05071	1	0	1	0	1	1	0	0	0	1	1	1	0	0	1	1	1	0	1	1	1	1	0	0	1	0	1	0
Peak2476	2L	18998036	18998297	intergenic	0.662393	1	0	1	0	0	0	0	0	0	0	1	0	0	0	0	0	0	0	0	1	0	0	0	0	0	0	1	0
Peak2484	2L	19043656	19044217	CDS	1.21251	1	1	1	0	0	0	0	0	0	0	0	0	1	0	0	0	0	1	0	0	0	1	0	0	1	0	0	0
Peak2493	2L	19098433	19098810	intron	1.04402	1	0	0	0	0	0	0	0	0	0	0	0	0	0	0	0	0	0	0	0	0	0	0	0	0	0	0	0
Peak2502	2L	19136273	19136764	intron	0.679363	1	1	1	0	1	0	0	0	0	1	1	0	1	0	1	1	1	1	1	1	1	1	0	0	0	0	0	0
Peak2506	2L	19139559	19140387	intron	0.896513	1	0	0	0	0	0	0	0	0	0	0	0	0	0	1	0	1	0	0	0	0	0	0	0	0	0	0	0
Peak2508	2L	19154580	19155536	intron	0.44734	1	0	0	0	0	0	0	0	0	0	0	0	0	0	0	0	0	0	0	0	0	0	0	0	0	0	0	0
Peak2516	2L	19178301	19178500	UTR	2.1555	1	0	0	1	1	0	0	0	0	0	0	0	0	0	0	0	0	0	0	0	0	0	0	0	0	0	0	0
Peak2522	2L	19191837	19192185	intron	0.816361	1	0	0	0	0	0	0	0	0	0	0	0	0	0	0	0	0	0	0	0	0	0	0	0	0	0	0	0
Peak2524	2L	19199543	19200358	intron	0.831546	1	0	1	0	0	0	0	0	0	1	1	0	1	0	1	0	0	1	1	1	0	1	0	0	0	0	0	0
Peak2525	2L	19208779	19209452	intergenic	0.427794	1	1	1	0	1	0	0	0	0	0	0	0	1	0	0	0	0	1	0	0	0	1	0	0	1	0	1	0
Peak2528	2L	19218250	19218569	intergenic	0.80048	1	1	1	0	0	1	1	0	0	1	1	1	1	0	1	1	1	1	1	1	1	1	0	1	1	1	1	0
Peak2529	2L	19219649	19220787	intergenic	0.400649	1	1	1	0	0	1	0	0	0	1	1	1	0	0	1	1	1	0	1	1	1	1	0	0	0	0	1	0
Peak2530	2L	19222480	19222847	intergenic	0.546275	1	0	1	0	0	0	0	0	0	0	1	0	1	0	0	0	0	0	0	1	0	1	0	0	0	0	0	0
Peak2532	2L	19229415	19229758	intergenic	1.24399	1	0	1	0	0	0	0	0	0	0	0	0	0	0	0	0	0	0	0	1	0	0	0	0	0	0	0	0
Peak2533	2L	19229887	19230084	intergenic	0.825752	1	1	1	1	0	0	0	0	0	0	1	0	1	1	0	1	0	0	1	1	0	1	1	0	0	0	0	0
Peak2535	2L	19314352	19314680	intergenic	0.742749	1	1	1	0	0	0	0	0	0	0	0	0	1	0	1	1	0	1	0	1	0	1	0	0	0	0	0	0
Peak2536	2L	19319030	19319653	intergenic	0.679738	1	0	1	0	0	0	0	0	0	0	1	0	0	0	0	0	0	0	1	1	0	0	0	0	0	0	0	0
Peak2537	2L	19322492	19324174	intergenic	0.657048	1	0	0	0	0	1	0	0	0	0	0	0	0	0	0	0	0	0	0	0	0	0	0	0	0	0	0	0
Peak2538	2L	19324835	19325157	intergenic	1.19121	1	0	1	1	1	0	0	0	0	0	0	0	0	0	1	0	0	0	0	0	0	0	0	0	1	0	0	0
Peak2539	2L	19326671	19327900	intergenic	0.327198	1	1	1	0	0	1	0	0	0	1	1	1	1	0	1	1	1	1	1	1	1	1	0	0	0	0	0	0
Peak2540	2L	19329494	19329940	intergenic	1.78512	1	0	1	0	0	0	0	0	0	1	0	0	1	0	1	1	0	1	1	1	0	1	0	0	0	0	0	0
Peak2548	2L	19357556	19358150	intron	0.510322	1	0	0	0	0	0	0	0	0	0	0	0	0	0	0	0	0	0	0	0	0	0	0	0	0	0	0	0
Peak2555	2L	19378568	19378935	intergenic	0.721713	1	0	0	0	0	0	0	0	0	0	1	0	1	0	0	0	0	0	0	0	0	0	0	0	0	0	0	0
Peak2575	2L	19459358	19459709	intergenic	0.777525	1	0	1	0	0	1	0	0	0	0	0	0	0	0	0	0	0	0	0	0	0	1	0	0	0	0	0	0
Peak2576	2L	19475410	19475811	intergenic	0.951962	1	0	0	0	0	0	0	0	0	0	0	0	0	0	0	0	0	0	0	0	0	0	0	0	0	0	0	0
Peak2579	2L	19507348	19507622	CDS	0.739675	1	0	1	0	0	0	0	0	0	0	0	0	0	0	0	0	0	0	0	0	0	0	0	0	0	0	0	0
Peak2609	2L	19605650	19605984	intron	0.58333	1	0	0	0	1	0	0	0	0	0	0	0	0	0	1	1	0	0	0	0	0	0	0	0	0	0	0	0
Peak2612	2L	19703177	19703534	intron	0.555592	1	0	0	0	0	0	0	0	0	0	0	0	0	0	0	0	0	1	0	0	0	0	0	0	0	0	0	0
Peak2633	2L	19866539	19867216	intron	0.409174	1	0	0	0	0	0	0	0	0	0	0	0	0	0	1	0	0	0	0	0	0	0	0	0	0	0	0	0
Peak2634	2L	19869522	19869754	intron	0.677337	1	0	0	0	0	0	0	0	0	0	0	0	0	0	1	0	1	1	0	0	0	0	0	0	0	0	0	0
Peak2641	2L	19937904	19938330	intron	1.22165	1	0	0	0	0	0	0	0	0	0	0	0	0	0	0	0	0	0	0	0	0	0	0	0	0	0	0	0
Peak2646	2L	20062448	20064019	CDS	1.15249	1	1	1	0	1	0	1	0	0	0	0	1	1	0	1	0	1	1	0	0	0	1	1	0	1	1	1	0
Peak2647	2L	20064359	20065791	promoter	0.610251	1	0	1	0	0	0	0	0	0	0	1	0	0	0	0	0	0	0	1	1	0	1	0	0	0	0	0	0
Peak2649	2L	20069132	20069605	CDS	1.32414	1	0	1	0	0	0	0	0	0	0	0	0	0	0	0	0	0	0	0	0	0	0	0	0	0	0	0	0
Peak2662	2L	20104523	20104934	intergenic	0.455199	1	0	1	0	1	0	0	0	0	1	1	0	0	0	0	0	0	0	1	1	0	0	0	0	0	0	1	0
Peak2663	2L	20115871	20116193	intergenic	0.686728	1	0	1	0	0	0	0	0	0	0	0	0	0	1	1	0	0	0	0	1	0	0	1	0	0	0	0	0
Peak2664	2L	20118079	20118327	intergenic	0.444928	1	0	1	1	1	1	0	0	0	0	0	0	0	0	1	0	1	0	0	0	0	0	0	0	0	0	0	0
Peak2671	2L	20204904	20205480	intergenic	0.769644	1	0	0	1	0	0	0	0	0	0	0	0	0	0	0	0	0	0	0	0	0	0	0	0	0	0	0	0
Peak2680	2L	20481170	20481461	intergenic	0.926834	1	0	0	0	0	0	0	0	0	0	0	0	0	0	0	0	0	0	0	0	0	0	0	0	0	0	0	0
Peak2682	2L	20486947	20487564	intergenic	0.92247	1	0	1	0	0	0	0	0	0	1	1	0	1	0	1	1	0	1	1	1	0	1	0	0	0	0	0	0
Peak2684	2L	20494304	20494762	intergenic	0.687389	1	0	0	0	0	0	0	0	0	0	0	0	0	0	0	0	0	0	0	0	0	0	0	0	0	0	0	0
Peak2693	2L	20682880	20683302	CDS	0.829241	1	0	0	0	0	1	0	0	0	0	0	0	0	0	0	0	1	0	0	0	0	0	0	0	0	0	0	0
Peak2694	2L	20715997	20716502	intergenic	0.760103	1	1	1	0	0	0	0	0	0	0	0	0	0	0	0	1	0	1	0	0	0	0	0	0	0	0	0	0
Peak2700	2L	20768363	20769397	intergenic	1.09263	1	0	0	1	1	0	0	0	0	1	1	1	1	0	1	1	0	1	1	1	0	1	0	0	0	0	0	0
Peak2701	2L	20770266	20771940	promoter	0.451542	1	0	0	0	0	0	0	1	1	1	1	1	0	0	1	0	1	0	0	0	0	0	1	0	0	0	0	0
Peak2703	2L	20778275	20778986	intron	0.543893	1	1	1	0	0	0	0	0	0	1	1	0	1	0	1	1	1	1	1	1	0	1	0	0	0	0	0	0
Peak2705	2L	20784422	20784704	intergenic	0.776071	1	1	0	0	0	0	0	0	0	0	0	0	0	0	0	0	0	1	0	0	0	0	0	0	0	0	0	0
Peak2706	2L	20785346	20785726	intergenic	0.717015	1	1	0	0	0	0	0	0	0	0	0	0	0	0	0	0	0	1	0	0	0	0	0	0	0	0	0	0
Peak2712	2L	20798925	20799368	intron	0.697132	1	0	0	0	0	0	0	0	0	0	0	0	0	0	0	0	0	0	0	0	0	0	0	0	0	0	0	0
Peak2713	2L	20799778	20800800	intron	0.421347	1	0	1	0	0	0	0	0	0	0	0	0	0	0	0	0	0	0	0	0	0	0	0	0	0	0	0	0
Peak2717	2L	20822661	20823202	promoter	0.491884	1	1	1	0	1	1	1	0	0	1	1	1	1	0	1	1	1	1	1	1	1	1	0	1	0	0	0	0
Peak2718	2L	20825231	20825568	promoter	0.724455	1	1	1	0	1	1	0	0	0	1	1	1	1	0	1	1	1	1	1	1	1	1	0	0	0	0	0	0
Peak2722	2L	20916797	20917628	promoter	0.960358	1	0	0	0	0	1	0	0	0	1	1	1	1	0	1	1	1	1	1	1	0	1	0	0	0	0	0	0
Peak2723	2L	20917965	20918202	intron	1.3022	1	1	1	0	1	1	0	0	0	1	1	1	1	0	1	1	1	1	1	1	1	1	0	0	0	0	0	0
Peak2728	2L	20940320	20940648	intergenic	0.483411	1	1	1	0	1	1	0	0	0	1	1	1	1	0	1	1	1	1	1	1	1	1	0	0	0	0	0	0
Peak2729	2L	20956303	20956853	intergenic	0.461977	1	0	0	0	0	0	0	1	0	1	1	1	0	0	1	0	1	0	1	0	1	0	0	0	0	0	0	0
Peak2731	2L	20960364	20960607	intergenic	0.731477	1	0	0	0	0	0	0	1	0	1	1	1	1	0	1	0	1	1	1	0	0	0	0	0	0	0	0	0
Peak2734	2L	20968732	20969708	promoter	0.535864	1	0	1	0	0	0	0	0	0	1	1	1	1	0	1	1	1	1	1	1	1	1	0	0	0	0	0	0
Peak2739	2L	20994700	20995570	intron	0.786832	1	0	1	0	0	0	0	0	0	0	0	0	0	0	0	0	0	0	0	1	0	0	0	0	0	0	0	0
Peak2742	2L	20998809	20999293	intron	0.870936	1	0	1	1	0	0	0	0	0	0	0	0	0	0	1	0	0	0	0	1	0	0	1	0	0	0	0	0
Peak2744	2L	21009013	21009458	intron	0.817381	1	0	0	1	0	0	0	0	0	0	0	0	0	1	1	0	0	0	0	1	0	0	1	0	0	0	0	0
Peak2745	2L	21009600	21010156	intron	0.63373	1	0	1	1	1	0	1	0	0	1	0	0	0	0	1	0	1	1	0	0	0	0	1	0	0	0	0	0
Peak2748	2L	21019856	21020077	intron	1.19288	1	0	1	1	0	1	1	0	0	0	0	0	0	0	0	0	0	0	0	1	0	0	1	0	0	1	1	0
Peak2749	2L	21023965	21024468	intron	0.832342	1	0	1	0	0	0	0	0	0	0	0	0	0	1	0	0	0	0	0	1	0	0	0	0	0	0	0	0
Peak2757	2L	21039518	21040122	intron	1.14468	1	0	1	0	0	0	0	0	0	0	0	0	0	0	0	0	0	0	0	1	0	0	0	0	0	0	0	0
Peak2758	2L	21040578	21041201	intron	1.53786	1	0	1	0	0	0	0	0	0	1	1	0	0	1	0	1	0	0	1	1	0	0	1	0	0	0	0	0
Peak2759	2L	21049357	21049565	intron	1.08429	1	1	1	1	0	0	0	0	0	0	0	0	0	0	0	0	0	0	0	0	0	0	0	0	0	0	0	0
Peak2765	2L	21099021	21099477	CDS	0.701412	1	1	1	0	0	0	0	0	0	0	0	0	1	0	1	0	1	1	0	0	0	1	0	0	0	0	0	0
Peak2773	2L	21109845	21110273	intron	0.676427	1	0	1	0	0	0	0	0	0	0	0	0	0	0	0	0	0	0	0	0	0	0	0	0	0	0	0	0
Peak2775	2L	21124095	21124526	intergenic	1.09756	1	1	1	0	0	0	0	0	0	1	1	0	1	0	1	1	0	1	1	1	0	1	0	0	0	0	0	0
Peak2777	2L	21133754	21134069	UTR	0.791313	1	0	0	0	0	0	0	1	0	1	1	0	0	1	0	0	0	0	0	1	0	0	0	0	0	0	0	0
Peak2778	2L	21134660	21135278	CDS	0.580606	1	0	0	0	0	0	0	0	0	0	0	0	0	0	0	0	0	0	0	0	0	0	0	0	0	0	0	0
Peak2791	2L	21161496	21161901	CDS	0.82175	1	0	1	1	1	0	0	0	0	0	0	0	0	0	1	0	0	0	0	0	0	0	0	0	1	0	0	0
Peak2797	2L	21170200	21170404	CDS	1.10066	1	0	1	0	1	0	0	0	0	0	1	0	0	0	0	1	0	0	1	1	0	0	0	0	0	0	1	0
Peak2800	2L	21190917	21191174	intron	1.34809	1	0	0	0	1	0	0	0	0	1	1	0	1	0	1	0	0	1	0	0	0	0	0	0	0	0	0	0
Peak2812	2L	21250801	21251046	intron	0.708093	1	1	1	1	1	1	0	0	0	0	0	0	1	0	0	0	0	1	0	0	0	1	0	0	1	0	1	1
Peak2818	2L	21282910	21283578	intergenic	0.549503	1	0	0	0	0	0	0	0	0	0	0	0	0	0	1	0	0	1	1	0	0	0	1	0	0	0	0	0
Peak2820	2L	21293265	21293707	intron	0.730459	1	0	1	0	1	0	0	1	0	1	1	1	1	1	1	0	0	0	1	1	1	1	0	0	0	0	0	0
Peak2828	2L	21330961	21331147	intergenic	0.801895	1	0	1	1	0	0	0	0	0	0	0	0	0	0	1	0	0	0	0	0	0	0	0	0	0	0	0	0
Peak2830	2L	21339097	21339549	CDS	0.86225	1	0	0	0	0	0	0	0	0	0	0	0	0	0	1	0	0	0	0	0	0	0	0	0	0	0	0	0
Peak2834	2L	21424830	21425318	promoter	0.566123	1	0	1	0	1	0	0	0	0	1	1	0	0	0	1	1	0	0	1	1	0	1	0	0	0	0	0	0
Peak2836	2L	21537523	21537825	CDS	0.607883	1	1	1	0	0	0	0	0	0	1	1	0	1	0	1	1	0	1	1	1	0	0	0	0	0	0	0	0
Peak2837	2L	21543589	21543849	intergenic	0.652419	1	0	1	1	0	1	1	0	0	1	0	0	0	0	1	0	1	1	0	0	0	0	1	0	0	0	0	0
Peak2847	2L	21611740	21612134	intergenic	0.628116	1	0	0	0	0	0	0	0	0	0	0	0	0	0	0	0	0	0	0	0	0	0	0	1	0	0	0	0
Peak2852	2L	21621188	21621640	intron	0.724104	1	1	1	0	0	0	0	0	0	0	1	0	0	0	0	1	1	0	0	1	1	0	0	0	0	0	0	0
Peak2869	2L	21708037	21708468	intron	0.474667	1	0	1	0	0	0	0	0	0	1	1	1	1	0	0	0	0	0	1	1	0	0	0	0	0	0	0	0
Peak2870	2L	21741395	21742245	CDS	0.664156	1	0	1	0	0	0	0	0	0	0	0	0	0	0	0	0	0	0	0	0	0	0	0	0	0	0	0	0
Peak2873	2L	21748582	21748876	intron	0.654984	1	1	1	1	0	0	0	0	0	0	0	0	0	0	0	0	0	0	0	0	0	0	0	0	0	0	0	0
Peak2874	2L	21748928	21749410	intron	0.498979	1	0	0	0	0	0	0	0	0	0	0	0	1	0	0	0	0	1	0	0	0	1	0	0	1	0	0	0
Peak2877	2L	21754840	21755093	intron	1.02864	1	1	1	0	0	1	1	0	0	1	0	1	1	0	1	0	1	1	0	0	0	1	0	0	0	0	0	0
Peak2884	2L	21789491	21789769	intron	1.04046	1	0	0	0	0	0	0	0	0	0	0	0	0	0	0	0	0	0	0	0	0	0	0	0	0	0	0	0
Peak2885	2L	21793952	21794230	intron	2.62882	1	0	1	0	1	0	0	0	0	1	1	0	1	0	1	1	0	0	1	1	0	1	0	0	0	0	0	0
Peak2890	2L	21810058	21810437	intergenic	0.994947	1	1	1	0	0	0	0	0	0	0	0	0	0	0	0	1	1	1	0	0	0	0	0	0	0	0	0	0
Peak2891	2L	21814430	21814765	intergenic	0.616094	1	0	1	0	0	0	0	0	0	1	0	0	1	0	0	0	0	0	1	0	0	1	0	0	0	0	0	0
Peak2892	2L	21828055	21829278	promoter	0.688338	1	0	1	0	0	1	0	1	0	0	1	0	0	0	1	0	0	0	0	0	0	0	0	0	0	0	0	0
Peak2894	2L	21836306	21836658	UTR	0.976774	1	0	1	0	0	0	0	0	0	0	0	0	0	0	0	0	0	0	0	0	0	0	0	0	0	0	0	0
Peak2896	2L	21843271	21844171	intergenic	1.31454	1	0	1	0	0	0	0	1	0	0	0	0	0	1	1	0	0	0	0	1	0	0	0	0	0	0	0	0
Peak2900	2L	21847245	21848159	intergenic	0.495897	1	0	1	0	0	0	0	0	0	0	0	0	0	1	1	0	0	1	0	1	0	0	0	0	0	0	0	0
Peak2902	2L	21851347	21851888	intergenic	0.739119	1	0	0	0	0	0	1	0	0	0	0	0	0	0	0	0	0	0	0	1	0	0	0	0	0	0	0	0
Peak2903	2L	21853064	21853975	intergenic	1.66395	1	0	1	1	1	1	1	0	0	1	1	1	1	0	1	1	1	1	1	1	1	1	0	0	0	0	0	0
Peak2904	2L	21855257	21855497	intergenic	0.93719	1	1	1	0	0	0	0	0	0	0	0	0	1	0	1	1	1	1	0	1	0	1	0	0	0	0	0	0
Peak2905	2L	21855712	21856405	intergenic	0.80079	1	0	1	0	0	1	0	0	0	0	1	0	0	0	0	0	0	0	1	1	0	0	0	0	0	0	0	0
Peak2906	2L	21857781	21858078	intergenic	0.672605	1	0	1	1	1	1	0	0	0	0	0	0	0	0	1	0	1	0	0	0	0	0	0	0	0	0	0	0
Peak2910	2L	21866355	21866819	intergenic	0.457397	1	1	0	0	0	0	0	0	0	1	1	1	1	0	1	1	1	1	0	0	0	0	0	0	0	0	0	0
Peak2912	2L	21870214	21870415	intergenic	0.749084	1	1	1	1	1	0	0	0	0	0	0	0	1	0	0	0	0	1	0	0	0	1	0	0	1	0	1	0
Peak2916	2L	21876802	21877779	intergenic	0.498844	1	1	1	1	1	0	0	0	0	0	0	0	0	0	0	0	0	0	0	0	0	0	0	0	1	0	0	0
Peak2917	2L	21878901	21879406	intergenic	0.928697	1	0	1	0	1	0	0	0	0	1	1	0	1	0	1	1	0	1	1	1	0	1	0	0	0	0	0	0
Peak2919	2L	21899220	21899796	intergenic	0.580952	1	0	0	1	1	1	1	1	0	1	1	1	1	0	1	1	1	1	1	1	1	1	0	0	0	0	0	0
Peak2921	2L	21978169	21978476	intergenic	0.846738	1	1	1	0	0	0	0	0	0	1	1	0	1	0	1	1	1	1	1	1	1	1	0	0	0	0	0	0
Peak2924	2L	22046110	22046336	intergenic	1.0988	1	1	1	0	0	0	0	0	0	1	1	1	1	0	1	1	1	1	1	1	1	1	0	0	0	0	0	0
Peak2931	2L	22133985	22134559	promoter	0.630915	1	1	1	0	0	0	0	0	0	0	0	0	0	0	0	0	0	0	0	0	0	0	0	0	0	0	0	0
Peak2934	2L	22144075	22144536	CDS	0.594953	1	0	0	1	1	0	1	0	0	1	0	0	1	0	1	0	1	1	1	0	0	0	1	0	0	0	0	0
Peak2936	2L	22151383	22152859	promoter	1.14076	1	0	0	1	1	0	1	0	0	1	0	0	1	0	0	0	0	0	0	0	0	0	0	0	0	0	0	0
Peak2941	2L	22174334	22174803	intergenic	0.771665	1	0	0	0	0	1	0	0	0	0	0	0	0	0	0	0	0	0	0	0	0	0	0	0	0	0	0	0
Peak2955	2L	22444484	22444780	UTR	0.624354	1	0	1	0	0	0	0	0	0	0	0	0	0	1	0	0	0	0	0	1	0	1	0	0	0	0	0	0
Peak2963	2L	22879447	22879647	intron	0.506451	1	1	1	0	0	0	0	0	0	0	0	0	1	0	0	0	0	1	0	0	0	1	0	0	0	0	0	0
Peak2968	2R	75541	75912	promoter	0.610609	1	0	1	0	0	0	0	0	0	1	1	0	1	0	0	1	0	0	1	1	0	1	0	0	0	0	0	0
Peak2975	2R	360003	360259	intergenic	0.965776	1	0	1	0	0	1	0	1	0	0	0	0	0	1	1	0	1	0	0	1	0	0	0	0	0	0	0	0
Peak2987	2R	497379	498064	intergenic	0.988571	1	1	1	0	0	0	0	0	0	1	1	0	1	0	1	1	0	1	1	1	0	1	0	0	0	0	0	0
Peak2991	2R	504958	505210	intergenic	0.519721	1	0	0	0	0	0	0	0	0	0	0	0	1	0	1	0	1	1	0	0	0	0	0	0	0	0	1	0
Peak2992	2R	505706	505983	intergenic	0.657632	1	1	0	0	0	0	0	0	0	0	0	0	0	0	0	0	0	0	0	0	0	0	0	0	0	0	0	0
Peak2999	2R	595873	596243	intron	0.895332	1	0	1	0	0	0	0	0	0	0	0	0	0	0	0	0	0	0	0	0	0	0	0	0	0	0	0	0
Peak3006	2R	675582	675829	CDS	0.537774	1	1	1	0	0	0	0	0	0	1	1	0	1	0	1	1	0	1	1	1	0	1	0	0	0	0	0	0
Peak3013	2R	937155	937918	intergenic	1.89449	1	0	1	0	0	0	0	0	0	0	1	0	0	0	0	0	0	0	1	1	0	0	0	0	0	0	1	0
Peak3014	2R	938476	939207	intergenic	1.66796	1	1	1	0	1	1	0	0	0	1	1	1	1	0	1	1	1	1	1	1	1	1	0	0	0	0	0	0
Peak3015	2R	939557	939782	intergenic	1.28703	1	0	1	0	0	0	0	0	0	0	1	0	0	1	0	0	0	0	0	1	0	0	0	0	0	0	0	0
Peak3016	2R	940091	940375	intergenic	2.17616	1	0	0	0	0	0	0	1	0	0	1	0	1	0	1	0	0	0	0	0	0	0	0	0	0	0	0	0
Peak3017	2R	941024	941385	intergenic	1.34359	1	0	0	0	0	0	0	0	0	0	0	0	0	0	0	0	0	0	0	0	0	0	0	0	0	0	0	0
Peak3018	2R	941824	942326	intergenic	1.07397	1	0	1	0	0	0	0	1	0	0	1	0	0	0	0	0	0	0	0	1	0	0	0	0	0	0	1	0
Peak3019	2R	942615	943860	intergenic	1.02342	1	0	1	0	0	0	0	0	0	0	0	0	1	0	0	0	0	1	0	0	0	1	0	0	1	0	1	1
Peak3030	2R	1087809	1088062	intron	0.810134	1	0	0	0	1	0	0	0	0	0	0	0	0	0	0	0	0	0	0	0	0	0	0	0	0	0	0	0
Peak3031	2R	1110920	1111332	intron	1.06108	1	0	1	0	0	0	0	0	0	0	0	0	0	0	0	0	0	0	0	0	0	0	0	0	0	0	0	0
Peak3045	2R	1196162	1196492	intron	0.51927	1	0	0	0	0	0	0	1	0	0	1	0	0	0	0	0	0	0	0	1	0	0	0	0	0	0	0	0
Peak3047	2R	1231917	1232329	intergenic	0.966955	1	0	1	1	0	0	0	0	0	0	0	0	0	0	1	0	0	0	0	0	0	0	0	0	0	0	0	0
Peak3056	2R	1259048	1259512	intergenic	0.565112	1	1	0	0	0	0	0	0	0	0	0	0	1	0	0	0	1	1	0	0	0	1	0	0	0	0	0	0
Peak3074	2R	1565158	1565581	CDS	0.859397	1	0	1	0	0	0	0	0	0	0	1	0	0	1	0	0	0	0	1	1	0	0	0	0	0	0	1	0
Peak3082	2R	1598572	1599154	intron	0.861635	1	1	0	0	1	0	0	0	0	0	0	0	0	0	0	0	0	1	0	0	0	0	0	0	1	0	0	0
Peak3088	2R	1638896	1639132	intergenic	1.63177	1	0	1	0	0	0	0	0	0	0	1	0	1	1	0	0	0	0	1	1	0	1	0	0	0	0	0	0
Peak3093	2R	1660607	1660825	UTR	0.522847	1	0	1	0	0	0	0	0	0	0	0	0	0	0	0	0	0	0	0	0	0	0	0	0	0	0	0	0
Peak3095	2R	1665368	1665781	CDS	0.74122	1	1	1	0	0	0	0	0	0	1	1	0	1	0	1	1	0	1	1	1	0	1	0	0	0	0	0	0
Peak3096	2R	1669636	1670516	promoter	0.337715	1	0	0	0	0	0	0	0	0	1	1	1	1	0	1	0	0	1	1	1	1	1	0	0	0	0	1	0
Peak3097	2R	1698571	1698783	intron	1.16346	1	0	1	0	1	0	1	0	0	1	1	0	1	0	1	1	0	1	1	1	1	1	0	0	0	0	0	0
Peak3099	2R	1824793	1826544	intergenic	0.562152	1	0	1	0	0	0	0	0	0	0	1	0	1	0	0	0	0	0	0	1	0	1	0	0	1	0	0	0
Peak3100	2R	1854374	1854571	intergenic	0.808329	1	0	0	0	0	0	0	0	0	0	0	0	0	0	1	0	0	0	0	0	0	0	0	0	0	0	0	0
Peak3114	2R	1905122	1905403	promoter	0.891304	1	1	1	0	1	0	0	0	0	0	1	0	0	0	0	1	0	0	1	1	0	0	1	0	0	0	1	0
Peak3118	2R	1924988	1925693	CDS	0.45981	1	0	1	0	0	0	0	0	0	0	1	0	0	0	1	0	0	0	0	1	0	0	1	0	0	0	0	0
Peak3120	2R	1957718	1958245	intergenic	1.23615	1	1	1	1	1	0	0	0	0	1	1	0	0	0	1	1	1	1	1	1	1	1	0	0	1	0	1	0
Peak3129	2R	2007729	2008854	intron	0.509944	1	0	1	0	1	0	1	0	0	1	0	1	1	0	1	0	0	1	0	0	1	1	0	1	1	1	1	1
Peak3130	2R	2009305	2010179	intron	0.371858	1	0	0	0	1	0	0	0	0	1	1	0	1	0	1	0	0	0	1	1	0	0	0	0	0	0	0	0
Peak3131	2R	2012372	2012766	intron	0.56397	1	1	1	0	1	0	0	0	0	1	1	1	1	0	1	1	1	1	1	1	1	1	0	0	0	0	0	0
Peak3132	2R	2012895	2013509	intron	0.567865	1	0	1	0	1	0	0	0	0	1	1	0	1	0	1	1	0	0	1	1	0	1	0	0	0	0	0	0
Peak3143	2R	2035361	2035921	intron	0.796279	1	1	1	0	0	0	0	0	0	1	1	0	0	0	1	1	0	0	1	1	0	1	0	0	0	0	0	0
Peak3151	2R	2047204	2047541	intron	0.453953	1	1	1	1	1	1	1	0	0	1	1	1	1	0	1	1	1	1	1	1	1	1	0	0	0	0	0	0
Peak3153	2R	2048845	2050365	intron	0.317359	1	1	1	0	1	1	1	0	0	1	0	1	1	0	1	0	1	1	1	0	1	1	0	1	1	1	1	0
Peak3156	2R	2053298	2053876	intron	0.533431	1	1	1	1	0	1	0	0	0	0	0	0	0	0	0	1	0	0	0	1	0	0	0	0	0	0	0	0
Peak3157	2R	2054169	2054950	intron	0.386017	1	0	0	0	0	0	0	0	0	0	0	0	0	0	0	0	0	0	0	0	0	0	0	0	0	0	0	0
Peak3164	2R	2068516	2069447	promoter	0.70491	1	0	1	0	0	0	0	0	0	0	0	0	0	0	0	0	0	0	1	1	0	1	0	0	0	0	0	0
Peak3166	2R	2069856	2072567	CDS	0.775832	1	1	1	1	1	1	1	0	0	1	1	1	1	1	1	1	1	1	1	1	1	1	0	0	0	0	0	0
Peak3167	2R	2072655	2073840	CDS	0.773564	1	1	0	0	0	0	0	0	0	0	0	0	0	0	0	0	0	0	0	0	0	0	0	0	0	0	0	0
Peak3169	2R	2075251	2075782	intron	0.789456	1	0	0	0	0	0	0	0	0	0	0	0	0	0	0	0	0	0	0	0	0	0	0	0	0	0	0	0
Peak3170	2R	2075914	2077153	CDS	0.62375	1	0	1	0	0	0	0	0	0	0	0	0	0	0	0	0	0	0	0	0	0	0	0	0	0	0	0	0
Peak3172	2R	2079484	2079972	intron	0.645634	1	0	0	1	1	0	0	0	0	1	1	0	1	0	1	0	0	1	1	1	0	1	0	0	0	0	0	0
Peak3177	2R	2087195	2087651	intergenic	0.723226	1	0	1	0	0	0	0	0	0	1	1	0	0	0	0	0	0	0	1	1	0	0	0	0	0	0	0	0
Peak3181	2R	2103794	2104141	intron	0.617203	1	0	0	0	0	0	0	0	0	0	0	0	0	0	0	0	0	0	0	0	0	0	0	0	0	0	0	0
Peak3183	2R	2106871	2107188	intron	0.501396	1	0	0	0	0	0	0	0	0	0	0	0	0	0	0	0	0	0	0	0	0	0	0	0	0	0	0	0
Peak3186	2R	2111277	2111689	intron	0.759418	1	1	0	0	0	0	0	0	0	0	0	0	0	0	0	0	0	1	0	0	0	1	0	0	1	0	1	0
Peak3196	2R	2143719	2143990	intergenic	0.864587	1	0	1	0	0	0	0	0	0	0	0	0	0	0	0	0	0	0	0	1	0	0	0	0	0	0	0	0
Peak3198	2R	2286524	2286972	intergenic	0.909989	1	0	0	1	1	1	1	1	0	1	1	1	1	0	1	1	0	1	1	1	0	1	0	0	0	0	0	0
Peak3210	2R	2403810	2404678	intron	0.791748	1	0	0	0	0	0	1	0	0	0	0	0	0	0	1	0	0	0	0	0	0	0	1	0	0	0	1	0
Peak3214	2R	2414026	2414520	intron	0.531041	1	0	0	0	0	0	0	0	0	0	0	0	0	0	0	0	0	0	0	1	0	0	0	0	0	0	0	0
Peak3215	2R	2415187	2416051	intron	1.22833	1	0	1	1	0	1	0	0	0	0	0	0	0	0	0	0	0	0	0	0	0	0	0	0	0	0	0	0
Peak3220	2R	2465667	2466093	intron	0.945035	1	1	1	0	0	1	0	0	0	1	0	1	1	0	1	1	1	1	1	0	1	1	0	0	0	0	0	0
Peak3221	2R	2466455	2466787	intron	0.91318	1	1	1	1	1	1	0	0	0	0	0	0	1	0	0	0	0	1	0	0	0	1	0	0	1	0	1	1
Peak3225	2R	2478613	2478894	intron	0.930129	1	1	0	0	0	0	0	0	0	0	0	0	0	0	1	1	0	1	0	0	0	0	0	0	0	0	0	0
Peak3226	2R	2481710	2482236	intron	1.03872	1	0	0	0	0	0	0	0	0	0	0	0	0	0	0	0	0	0	0	0	0	0	0	0	0	0	0	0
Peak3227	2R	2482374	2482807	intron	0.396015	1	0	1	0	0	0	0	0	0	0	0	0	0	0	0	0	0	0	0	0	0	0	0	0	0	0	0	0
Peak3228	2R	2482887	2483167	intron	0.597987	1	0	0	0	0	0	1	0	0	0	0	0	0	1	1	1	1	1	1	1	0	1	0	0	0	0	0	0
Peak3230	2R	2487354	2488503	promoter	0.770907	1	1	0	0	0	0	0	1	0	0	1	0	1	0	1	1	1	1	0	0	0	0	0	0	0	1	0	0
Peak3231	2R	2488678	2489057	intron	0.635192	1	0	0	0	0	0	0	0	0	0	0	0	0	0	0	0	0	0	0	0	0	0	0	0	0	0	0	0
Peak3233	2R	2493186	2493911	intron	0.362494	1	0	0	0	0	0	0	0	0	0	0	0	0	0	0	0	0	0	0	0	0	0	0	0	0	0	0	0
Peak3234	2R	2494646	2495212	intron	0.603882	1	0	1	1	0	1	0	0	0	0	0	0	0	0	0	0	0	0	0	0	0	1	0	0	1	0	0	0
Peak3237	2R	2500267	2500840	intron	0.637055	1	0	0	0	1	1	0	0	0	1	1	1	1	0	0	0	0	0	0	0	0	0	0	0	0	0	0	0
Peak3242	2R	2506040	2506851	CDS	0.737274	1	0	0	0	0	0	0	1	0	1	1	0	1	1	0	0	0	0	1	0	0	1	0	0	0	0	0	0
Peak3244	2R	2508509	2508951	UTR	0.982148	1	0	0	1	1	1	1	1	1	1	1	1	1	0	1	1	1	1	1	1	1	1	0	0	0	0	0	0
Peak3245	2R	2509720	2509998	intergenic	1.11634	1	0	0	0	1	1	0	1	0	1	1	1	1	0	0	0	0	0	1	1	0	1	0	0	0	0	0	0
Peak3246	2R	2511780	2512096	promoter	0.485134	1	0	0	0	0	1	0	0	0	1	0	1	1	0	0	0	1	1	0	0	0	1	0	0	0	0	1	0
Peak3258	2R	2553622	2553822	intron	0.542236	1	0	1	0	1	0	0	0	0	1	1	0	1	0	0	1	0	0	1	1	0	1	0	0	0	0	0	0
Peak3262	2R	2561094	2562282	promoter	0.33056	1	0	0	1	1	1	1	1	0	1	1	1	1	0	1	1	1	1	1	1	1	1	0	0	0	0	0	0
Peak3285	2R	2700764	2702156	CDS	0.410268	1	1	0	0	0	0	0	0	0	0	0	0	0	0	1	0	1	1	0	0	0	0	0	0	0	0	0	0
Peak3287	2R	2715575	2715975	promoter	0.762116	1	0	1	1	1	1	1	0	0	1	1	1	1	0	1	1	1	1	1	1	1	1	0	0	0	0	0	0
Peak3288	2R	2750857	2751086	CDS	1.08697	1	0	0	0	0	0	0	0	0	1	1	1	1	0	0	1	0	1	0	0	0	0	0	0	0	0	0	0
Peak3293	2R	2835623	2836069	intron	0.611825	1	0	0	1	0	0	0	0	0	0	0	0	0	0	0	0	0	0	0	0	0	0	0	0	0	0	0	0
Peak3294	2R	2848532	2849250	intron	0.69061	1	1	0	0	0	0	0	0	0	0	0	0	1	0	1	0	1	1	0	0	0	1	0	0	0	0	0	0
Peak3296	2R	2867820	2868156	CDS	0.645823	1	0	0	0	0	0	0	0	0	1	1	0	1	0	0	0	0	0	1	1	0	0	0	0	0	0	0	0
Peak3297	2R	2872231	2872670	intron	0.705648	1	0	0	0	0	0	0	1	0	1	1	0	1	0	0	0	0	0	0	0	0	0	0	0	0	0	0	0
Peak3307	2R	2993617	2994353	promoter	0.46373	1	0	0	0	0	0	0	0	0	0	0	0	1	0	0	0	0	0	0	0	0	1	0	0	0	0	0	0
Peak3309	2R	3034394	3034772	intergenic	0.716798	1	0	0	0	0	0	0	0	0	0	0	0	0	0	0	0	0	0	0	0	0	0	0	0	0	0	0	0
Peak3311	2R	3059362	3059686	promoter	0.927091	1	0	1	1	1	1	1	0	0	1	1	1	1	0	1	1	1	1	1	1	1	1	0	0	0	0	0	0
Peak3315	2R	3171817	3172324	intron	0.846846	1	0	1	0	0	0	0	0	0	1	1	0	0	0	0	0	0	0	1	1	0	1	0	0	0	0	0	0
Peak3317	2R	3201391	3202137	intergenic	0.709843	1	0	1	0	0	0	0	0	0	0	1	0	1	0	0	0	0	0	1	1	0	1	0	0	0	0	0	0
Peak3329	2R	3229285	3229628	CDS	0.562545	1	0	1	0	1	0	0	1	0	1	1	1	1	1	0	0	0	0	1	1	0	1	0	0	0	0	0	0
Peak3332	2R	3243106	3243712	CDS	0.661853	1	0	1	0	0	0	0	0	0	1	1	0	1	0	0	0	0	0	1	1	0	1	0	0	0	0	0	0
Peak3336	2R	3246976	3248331	CDS	1.06585	1	0	1	1	0	1	1	0	0	0	0	0	0	0	1	0	1	1	0	0	0	0	0	0	0	1	0	0
Peak3337	2R	3249156	3249449	CDS	0.709187	1	0	0	0	0	0	0	0	0	0	0	0	0	0	0	0	0	0	0	0	0	0	0	0	0	0	0	0
Peak3339	2R	3253754	3255173	CDS	0.568995	1	0	0	0	0	0	0	0	0	1	1	0	0	0	0	0	0	0	0	0	0	0	0	0	0	0	0	0
Peak3348	2R	3271999	3272416	CDS	1.00112	1	0	1	0	0	0	0	0	0	0	0	0	0	0	0	0	0	0	0	0	0	0	0	0	0	0	0	0
Peak3355	2R	3297236	3297913	intergenic	1.10871	1	0	1	0	1	0	0	0	0	1	1	0	1	0	1	1	0	1	1	1	0	1	0	0	0	0	0	0
Peak3356	2R	3298397	3298663	intergenic	1.0455	1	0	1	0	0	0	1	0	0	0	1	0	0	0	0	1	0	1	0	1	0	0	1	0	1	0	1	0
Peak3363	2R	3326715	3327431	intergenic	0.897265	1	0	1	0	0	0	0	0	0	0	0	0	0	1	0	0	0	0	0	1	0	0	0	0	0	0	0	0
Peak3374	2R	3354769	3355324	CDS	0.952953	1	0	0	0	0	0	0	0	0	0	0	0	0	0	0	0	0	0	0	0	0	0	0	0	0	0	0	0
Peak3379	2R	3368453	3374809	promoter	0.396914	1	0	1	0	0	0	0	0	0	0	0	0	0	1	1	0	0	0	0	1	0	0	0	0	0	0	0	0
Peak3395	2R	3425465	3425682	CDS	0.786103	1	0	1	0	0	0	0	0	0	0	0	0	0	0	0	0	0	0	0	1	0	0	0	0	0	0	0	0
Peak3396	2R	3425897	3426679	CDS	0.950107	1	0	0	0	0	0	0	0	0	0	0	0	0	0	0	0	1	0	0	0	0	0	0	0	0	0	0	0
Peak3398	2R	3431559	3432029	intron	0.933136	1	0	0	0	0	0	0	0	0	0	0	0	0	0	0	0	0	0	0	0	0	0	0	0	0	0	0	0
Peak3405	2R	3479705	3480678	CDS	0.465851	1	0	0	0	1	0	0	0	0	0	0	0	0	0	1	0	0	0	0	0	0	0	0	0	0	0	0	0
Peak3408	2R	3487049	3487330	intron	0.816556	1	0	1	0	0	0	0	0	0	0	0	0	0	0	0	0	0	0	0	0	0	0	0	0	0	0	0	0
Peak3435	2R	3835176	3835839	CDS	0.91322	1	0	0	0	0	0	0	0	0	0	0	0	0	0	0	0	0	0	0	0	0	0	0	0	0	0	0	0
Peak3454	2R	3885740	3885990	promoter	0.823159	1	0	0	1	0	0	0	0	0	1	0	0	0	0	0	0	0	0	1	0	0	0	1	0	1	0	0	0
Peak3457	2R	3906190	3907105	intergenic	0.455611	1	0	1	0	1	0	0	0	0	0	0	0	0	0	1	0	1	0	0	0	0	0	0	0	0	0	0	0
Peak3458	2R	3909466	3909772	intergenic	0.600215	1	0	1	1	1	1	0	0	0	1	1	1	1	0	1	1	1	1	1	1	1	1	0	0	0	0	0	0
Peak3461	2R	3934017	3934559	intergenic	2.02142	1	1	1	1	1	1	1	1	1	1	1	1	1	0	1	1	0	1	1	0	0	0	0	0	0	0	0	0
Peak3462	2R	3937383	3938076	intergenic	1.68208	1	0	1	0	1	1	0	0	0	0	0	0	1	0	0	0	0	0	0	0	0	1	0	0	1	0	0	0
Peak3469	2R	3950040	3950347	intron	0.685628	1	0	1	0	0	0	0	0	0	0	0	0	0	0	0	0	0	0	1	1	0	0	0	0	0	0	0	0
Peak3470	2R	3951309	3951887	intron	0.454888	1	0	1	0	1	0	0	0	0	1	1	0	0	0	1	1	0	0	1	1	0	1	0	0	0	1	1	0
Peak3472	2R	3952925	3953550	promoter	0.416733	1	0	0	0	0	0	0	0	0	0	0	0	0	0	0	0	0	0	0	0	0	0	0	0	0	0	0	0
Peak3493	2R	4016893	4019620	promoter	0.379159	1	0	0	1	1	1	0	0	0	1	1	1	1	0	1	0	0	0	1	1	0	0	0	0	0	0	0	0
Peak3497	2R	4030563	4031040	intron	0.746941	1	1	1	0	0	0	0	0	0	0	0	0	1	0	1	0	0	1	0	0	0	1	0	0	1	0	1	0
Peak3498	2R	4033077	4033725	promoter	0.535047	1	0	1	0	0	0	0	0	0	0	1	0	0	0	0	0	0	0	0	0	0	0	0	0	0	0	0	0
Peak3513	2R	4067223	4067495	intron	0.828342	1	1	1	0	0	0	0	0	0	0	1	0	0	0	0	1	0	0	0	1	0	0	0	0	0	0	0	0
Peak3517	2R	4090755	4091223	intron	0.726224	1	0	1	0	0	0	0	0	0	1	1	0	1	0	0	0	0	0	1	1	0	0	0	0	0	0	0	0
Peak3523	2R	4120751	4121428	intergenic	0.746381	1	0	1	0	0	0	0	0	0	0	0	0	0	0	0	0	0	0	0	1	0	0	0	0	0	0	0	0
Peak3528	2R	4132612	4132936	intergenic	0.691921	1	1	0	1	1	1	1	1	0	1	1	1	1	0	0	0	0	0	1	1	0	1	0	0	0	0	0	0
Peak3531	2R	4135356	4136103	intergenic	0.981611	1	0	1	0	0	0	0	0	0	0	1	0	1	1	0	0	0	0	1	1	0	1	0	0	0	0	0	0
Peak3532	2R	4136617	4137135	promoter	0.870428	1	0	1	0	0	0	0	0	0	0	0	0	0	0	0	0	0	0	0	0	0	0	0	0	0	0	0	0
Peak3533	2R	4137566	4138735	intergenic	0.577546	1	0	1	0	1	0	0	0	0	0	1	0	0	1	0	1	0	0	1	1	0	0	1	0	0	0	1	0
Peak3537	2R	4230143	4230465	intron	0.958261	1	0	1	1	0	1	0	0	0	0	0	0	0	1	1	0	1	0	0	0	0	0	0	0	0	0	0	0
Peak3545	2R	4495343	4495594	intron	1.41303	1	0	0	0	0	0	0	0	0	0	0	0	0	0	0	0	0	0	0	0	0	0	0	0	0	0	0	0
Peak3547	2R	4502645	4502918	intron	0.788859	1	1	1	0	0	0	0	0	0	0	0	1	1	0	1	1	1	1	1	1	1	1	0	0	1	0	0	0
Peak3557	2R	4524537	4525061	intergenic	0.581911	1	0	1	0	0	1	0	0	0	0	0	0	0	1	0	0	0	0	0	0	0	0	0	1	0	0	0	0
Peak3558	2R	4525834	4526284	intergenic	0.671879	1	0	1	0	0	0	0	0	0	1	0	0	1	0	0	0	0	0	0	0	0	0	0	0	0	0	0	0
Peak3560	2R	4528298	4529236	intergenic	0.443361	1	0	1	0	0	0	0	1	0	0	1	0	0	0	0	0	0	0	0	1	0	0	0	0	0	0	0	0
Peak3561	2R	4529503	4530056	intergenic	0.546176	1	1	1	1	1	1	1	0	0	0	0	0	1	0	0	0	0	1	0	0	0	1	0	0	1	0	1	1
Peak3562	2R	4530511	4531452	intergenic	0.444425	1	1	1	1	1	1	0	0	0	0	0	0	1	0	0	0	0	1	0	1	0	1	0	0	1	0	1	1
Peak3574	2R	4548301	4551995	CDS	0.346791	1	0	1	0	1	1	0	1	0	0	0	0	1	1	0	0	1	0	0	0	0	1	0	0	1	0	1	1
Peak3581	2R	4606795	4607064	CDS	0.982422	1	0	1	0	0	1	0	0	0	1	1	1	0	0	0	0	1	0	1	1	1	1	0	0	0	0	0	0
Peak3585	2R	4684972	4685385	intergenic	0.538112	1	0	1	1	1	1	0	0	0	1	0	1	0	0	1	0	1	0	0	0	0	0	1	0	1	0	0	0
Peak3586	2R	4685527	4686150	promoter	0.598371	1	0	1	1	1	1	1	1	0	1	1	1	1	0	1	1	1	1	1	1	1	1	0	0	0	0	0	0
Peak3587	2R	4687731	4687967	intron	0.601553	1	1	1	0	0	0	0	0	0	1	1	1	1	0	1	1	1	1	0	0	0	0	0	1	1	0	0	0
Peak3588	2R	4689490	4689751	intron	0.835397	1	1	1	0	0	1	0	0	0	1	1	1	0	0	1	1	1	0	1	1	1	0	0	0	0	0	1	0
Peak3590	2R	4720148	4720491	CDS	1.33167	0	1	0	0	0	0	0	0	0	0	0	0	0	0	0	0	0	0	0	0	0	0	0	0	0	0	0	0
Peak3592	2R	4747654	4748080	promoter	0.479406	0	1	0	0	0	0	0	0	0	0	0	0	0	0	0	0	0	0	0	0	0	0	0	0	0	0	0	0
Peak3594	2R	4753837	4754119	intron	0.854448	0	1	0	0	0	0	0	0	0	0	0	0	0	0	0	0	0	0	0	0	0	0	0	0	0	0	0	0
Peak3609	2R	4844515	4844977	CDS	1.02475	0	1	1	0	0	0	0	0	0	0	0	0	1	0	0	0	0	1	0	0	0	1	0	0	0	0	0	0
Peak3613	2R	4937985	4938224	CDS	1.05522	0	1	0	0	0	1	0	0	0	0	0	0	1	0	1	0	1	1	0	0	0	1	0	0	0	0	1	0
Peak3614	2R	4959542	4959990	intron	0.644652	0	1	0	0	0	0	0	0	0	0	0	0	0	0	0	0	1	1	0	0	0	0	0	0	0	0	0	0
Peak3637	2R	5020613	5021443	promoter	0.6174	0	1	0	0	0	0	0	0	0	0	0	0	0	0	0	0	0	1	0	0	0	0	0	0	1	0	0	0
Peak3645	2R	5074470	5074783	CDS	0.779583	0	1	0	0	0	0	0	0	0	0	0	0	0	0	1	0	0	1	0	0	0	0	0	0	0	0	0	0
Peak3649	2R	5087666	5087919	intergenic	1.40646	0	1	0	1	1	1	0	0	0	1	0	0	0	0	0	0	0	0	0	0	0	0	0	0	0	0	0	0
Peak3651	2R	5118315	5119439	intron	0.388089	0	1	1	0	0	0	1	0	0	0	0	0	1	0	1	0	1	1	1	0	0	1	0	0	1	0	1	0
Peak3655	2R	5155935	5156316	CDS	0.841078	0	1	0	0	0	0	0	0	0	0	0	0	0	0	1	0	0	1	0	0	0	0	0	0	0	0	0	0
Peak3660	2R	5169738	5169936	intron	0.634182	0	1	0	0	0	1	0	0	0	0	0	0	0	0	1	0	1	1	0	0	0	0	0	0	0	0	0	0
Peak3672	2R	5290002	5290228	intergenic	1.01345	0	1	1	1	0	1	0	0	0	1	0	1	0	0	1	0	1	0	0	0	0	0	1	0	0	1	0	0
Peak3673	2R	5291246	5291575	CDS	1.04647	0	1	0	0	0	0	0	0	0	0	0	0	0	0	1	0	0	1	0	0	0	0	0	0	0	0	0	0
Peak3674	2R	5292379	5293105	intron	0.80629	0	1	1	0	1	0	0	0	0	0	0	0	1	0	0	0	0	1	0	0	0	1	0	0	1	0	1	0
Peak3675	2R	5293501	5293775	intron	0.624648	0	1	1	1	0	0	0	0	0	0	0	0	0	0	0	0	0	0	0	0	0	0	0	0	0	0	0	0
Peak3676	2R	5293973	5294636	intron	0.607966	0	1	0	0	0	0	0	1	0	0	0	0	0	1	1	1	1	1	0	0	0	0	0	0	0	0	0	0
Peak3680	2R	5301594	5302588	promoter	0.422787	0	1	0	0	0	0	0	0	0	0	0	0	0	0	0	0	0	0	0	0	0	0	0	0	0	0	0	0
Peak3681	2R	5307132	5307585	intergenic	0.961762	0	1	0	0	0	0	0	0	0	0	0	0	0	0	0	0	0	1	0	0	0	1	0	0	1	0	1	0
Peak3682	2R	5307844	5308078	intergenic	1.2211	0	1	0	0	0	0	0	0	0	0	0	0	0	0	0	0	0	1	0	0	0	1	0	0	0	0	0	0
Peak3687	2R	5329500	5329976	intron	0.534947	0	1	0	0	0	0	0	0	0	0	0	0	0	0	0	0	0	1	0	0	0	0	0	0	0	0	0	0
Peak3691	2R	5378389	5379026	intergenic	1.04095	0	1	0	0	0	0	0	0	0	0	1	0	1	0	0	1	0	1	0	0	0	0	0	0	0	0	0	0
Peak3696	2R	5435515	5436324	promoter	0.562004	0	1	1	0	0	0	0	0	0	0	0	0	1	0	0	0	0	1	0	0	0	1	0	0	0	0	0	0
Peak3697	2R	5436947	5437352	intergenic	0.888771	0	1	1	0	0	0	0	0	0	0	0	0	0	0	0	0	0	0	1	1	0	1	0	0	0	0	0	0
Peak3698	2R	5439600	5439871	intergenic	0.736828	0	1	1	0	0	0	0	0	0	0	0	0	0	0	0	1	0	0	1	1	0	1	0	0	0	0	0	0
Peak3704	2R	5472033	5472709	promoter	0.570659	0	1	1	0	0	1	0	0	0	0	0	0	0	0	0	0	0	0	0	0	0	0	0	0	0	0	0	0
Peak3712	2R	5571271	5571553	promoter	0.462812	0	1	0	0	0	1	0	0	0	0	0	0	0	0	1	0	1	1	0	0	0	0	0	0	0	0	0	0
Peak3715	2R	5582047	5582665	intergenic	0.545677	0	1	1	0	0	0	0	1	0	0	0	0	0	1	1	0	1	1	0	0	0	0	0	0	0	0	1	0
Peak3717	2R	5586634	5586805	intergenic	1.38503	0	1	1	0	0	0	0	0	0	0	0	0	0	0	0	1	0	0	0	1	0	0	0	0	0	0	0	0
Peak3718	2R	5587547	5587844	intergenic	0.815652	0	1	0	0	0	1	0	0	0	1	1	1	1	0	1	1	1	1	1	1	1	1	0	0	0	0	0	0
Peak3719	2R	5589469	5589845	intergenic	0.76446	0	1	1	0	0	0	0	0	0	0	0	0	1	0	0	0	0	1	0	0	0	1	0	0	0	0	0	0
Peak3722	2R	5601972	5602424	intron	0.535128	0	1	0	0	0	1	0	0	0	0	0	0	0	0	0	0	1	0	0	0	0	0	0	0	0	1	0	0
Peak3730	2R	5758982	5759512	CDS	0.660384	0	1	1	0	0	1	0	0	0	0	0	1	0	0	0	0	1	1	0	1	1	1	0	1	0	0	0	0
Peak3739	2R	5819081	5819542	intron	0.650978	0	1	0	0	0	0	0	0	0	0	0	0	0	0	0	0	0	1	0	0	0	0	0	0	0	0	0	0
Peak3740	2R	5821284	5821574	intron	0.72819	0	1	1	0	0	0	0	0	1	0	0	0	0	0	1	1	0	1	1	1	1	1	0	0	0	0	0	0
Peak3749	2R	5854767	5855165	CDS	0.826983	0	1	1	0	1	1	0	0	0	1	1	0	0	0	1	1	1	1	1	1	1	1	0	0	0	0	0	0
Peak3752	2R	5860681	5862134	intergenic	0.615165	0	1	1	0	1	1	0	0	0	1	1	1	0	0	1	1	1	1	1	1	1	1	0	0	0	0	0	0
Peak3753	2R	5862499	5863629	intergenic	1.60812	0	1	1	0	0	1	0	0	0	1	1	0	0	0	1	1	1	1	1	1	1	1	0	0	0	0	0	0
Peak3754	2R	5864494	5865966	intergenic	1.17068	0	1	0	1	0	0	0	1	0	1	1	0	0	0	0	0	0	0	0	0	0	0	0	0	0	0	0	0
Peak3755	2R	5866245	5869075	promoter	0.508268	0	1	0	0	0	0	0	1	0	0	0	0	0	0	0	0	0	0	0	0	0	0	0	0	0	0	0	0
Peak3756	2R	5870911	5872803	intergenic	1.27795	0	1	0	1	1	0	0	1	0	0	0	0	0	0	0	0	0	1	0	0	0	0	0	0	0	0	0	0
Peak3757	2R	5872944	5874799	intergenic	2.37638	0	1	0	0	0	0	0	0	0	0	0	0	0	0	0	0	0	0	0	0	0	0	0	0	0	0	0	0
Peak3766	2R	5924687	5925210	CDS	0.63592	0	1	1	0	0	1	0	0	0	1	1	1	1	0	1	1	1	1	1	1	1	1	0	0	0	0	0	0
Peak3767	2R	5925621	5926344	CDS	0.792927	0	1	1	0	0	0	0	0	0	1	1	0	1	0	1	1	1	1	1	1	0	1	0	0	0	0	0	0
Peak3779	2R	5943378	5944441	promoter	0.79808	0	1	0	0	0	0	0	0	0	1	1	0	1	0	1	1	0	1	0	0	0	1	0	0	0	0	0	0
Peak3780	2R	5945224	5945465	intron	0.842688	0	1	0	0	0	0	0	0	0	0	0	0	1	0	1	0	0	1	0	0	0	1	0	0	0	0	0	0
Peak3784	2R	5964473	5965392	intergenic	0.556472	0	1	1	0	0	1	0	0	0	1	1	0	1	0	1	1	1	1	1	1	0	1	0	0	0	0	0	0
Peak3785	2R	5965547	5966082	promoter	0.307172	0	1	1	0	0	0	0	0	0	0	0	0	0	0	0	0	0	0	0	0	0	0	0	0	0	0	0	0
Peak3803	2R	6011260	6011809	promoter	0.725924	0	1	1	0	0	0	0	0	0	0	0	0	1	0	0	0	0	1	0	0	0	1	0	0	0	0	0	0
Peak3807	2R	6016226	6016491	CDS	0.692908	0	1	0	0	0	0	0	0	0	0	0	0	0	0	0	0	0	1	0	0	0	0	0	0	0	0	0	0
Peak3809	2R	6046013	6046345	promoter	0.582445	0	1	1	0	0	0	0	0	0	0	0	0	0	0	1	1	0	0	1	1	0	1	0	0	0	0	0	0
Peak3810	2R	6098532	6099026	promoter	0.587228	0	1	0	0	0	0	0	0	0	0	0	0	0	0	0	0	0	0	0	0	0	0	0	0	0	0	0	0
Peak3811	2R	6101515	6101707	intron	0.876841	0	1	0	0	0	0	0	0	0	0	0	0	0	0	0	0	0	1	0	0	0	0	0	0	0	0	0	0
Peak3818	2R	6147027	6147443	CDS	0.762875	0	1	0	0	0	0	0	0	0	0	0	0	0	0	0	0	0	1	0	0	0	0	0	0	0	0	0	0
Peak3819	2R	6151231	6151493	intergenic	0.872766	0	1	1	0	0	0	0	0	0	1	1	0	0	0	1	1	1	1	1	1	1	1	0	0	0	0	0	0
Peak3820	2R	6152386	6152829	promoter	0.456312	0	1	0	0	0	0	0	0	0	1	0	0	0	0	1	0	0	1	0	0	0	0	0	0	0	0	0	0
Peak3822	2R	6163883	6164112	intron	1.24329	0	1	0	1	0	0	0	0	0	0	0	0	0	0	0	0	0	0	0	0	0	0	0	0	0	0	0	0
Peak3824	2R	6197487	6197944	promoter	0.323707	0	1	1	1	0	0	0	0	0	0	0	0	0	0	0	0	0	0	0	0	0	0	0	0	0	0	0	0
Peak3837	2R	6353172	6353600	UTR	0.825151	0	1	1	0	1	0	0	0	0	0	1	0	0	0	1	1	0	0	1	1	0	0	1	0	0	0	1	0
Peak3841	2R	6365868	6366312	promoter	0.619419	0	1	1	1	0	0	0	0	0	0	0	0	0	0	0	1	0	0	0	1	0	0	0	0	0	0	0	0
Peak3844	2R	6370280	6371938	CDS	0.398975	0	1	1	0	0	0	0	0	0	0	0	0	0	0	1	1	1	1	1	1	0	1	0	0	0	0	0	0
Peak3852	2R	6389784	6390029	CDS	0.655824	0	1	0	0	0	0	0	0	0	0	0	0	0	0	0	1	0	0	0	0	0	0	0	0	0	0	0	0
Peak3868	2R	6424873	6426518	intron	0.58961	0	1	0	0	0	1	0	0	0	0	0	0	0	0	1	0	1	1	0	0	0	0	0	0	0	0	0	0
Peak3872	2R	6435731	6436336	intergenic	0.920736	0	1	0	0	0	0	0	0	0	0	0	0	0	0	1	1	0	1	0	0	0	0	0	0	0	0	0	0
Peak3875	2R	6440378	6440764	intergenic	0.465986	0	1	0	0	0	0	0	0	0	0	0	0	0	0	1	1	1	1	0	0	0	0	0	0	0	0	0	0
Peak3879	2R	6446876	6447526	intron	0.372153	0	1	0	0	0	0	0	1	0	0	0	0	0	0	0	0	0	1	0	0	0	0	0	0	0	0	0	0
Peak3886	2R	6456236	6457155	promoter	0.478593	0	1	0	0	0	0	0	1	0	0	0	0	0	0	0	1	0	0	0	0	0	0	0	0	0	0	0	0
Peak3895	2R	6471529	6472943	intron	0.380956	0	1	1	0	0	0	0	0	0	0	1	0	0	0	0	1	0	1	0	1	0	1	0	0	0	0	0	0
Peak3896	2R	6483466	6484780	intron	0.409931	0	1	1	0	0	0	0	0	0	0	0	0	0	0	0	1	0	1	0	1	0	1	0	0	0	0	0	0
Peak3917	2R	6560581	6561125	promoter	0.496722	0	1	0	0	0	0	0	0	0	1	1	0	0	0	1	1	0	1	0	0	0	0	0	0	0	0	0	0
Peak3938	2R	6741533	6741777	promoter	0.521332	0	1	0	0	0	1	0	0	0	0	0	0	1	0	1	0	1	1	1	0	0	1	0	0	0	0	0	0
Peak3940	2R	6747307	6747605	intron	0.725619	0	1	0	0	0	0	0	0	0	0	0	0	0	0	0	0	0	0	0	0	0	0	0	0	0	0	0	0
Peak3942	2R	6756344	6756770	intron	1.20373	0	1	0	0	0	0	0	0	0	0	0	0	0	0	0	0	0	0	0	0	0	0	0	0	0	0	0	0
Peak3944	2R	6758661	6759098	intron	0.942966	0	1	1	0	0	0	0	0	0	0	0	0	1	0	1	0	0	1	1	0	0	1	0	0	0	0	1	0
Peak3956	2R	6972765	6973385	promoter	0.871249	0	1	1	0	0	0	0	0	0	0	0	0	0	0	1	1	0	0	1	1	0	0	0	0	0	0	1	0
Peak3963	2R	7002221	7002443	intergenic	1.11125	0	1	1	1	1	1	1	0	0	0	0	0	0	0	0	0	0	0	0	0	0	0	0	0	0	0	0	0
Peak3964	2R	7002723	7003076	intergenic	0.8024	0	1	1	0	0	0	0	0	0	0	0	0	0	0	0	0	0	0	0	0	0	0	0	0	0	0	0	0
Peak3971	2R	7078850	7079952	intron	0.641003	0	1	0	0	0	0	0	0	0	0	0	0	0	0	0	0	0	0	0	0	0	0	0	0	0	0	0	0
Peak3979	2R	7091874	7092402	promoter	0.442119	0	1	1	0	0	0	0	0	0	0	0	0	0	0	1	1	0	1	1	1	0	1	0	0	0	0	0	0
Peak3993	2R	7126063	7126312	CDS	0.476614	0	1	1	0	0	0	1	0	0	0	0	0	1	0	1	0	1	1	0	0	0	1	0	0	0	0	1	0
Peak4018	2R	7285924	7288254	intergenic	0.385425	0	1	0	0	0	0	0	0	0	0	0	0	0	0	0	0	0	0	0	0	0	0	0	0	0	0	0	0
Peak4020	2R	7291025	7291617	intergenic	0.654523	0	1	0	0	0	1	1	0	0	0	0	1	1	0	1	0	1	1	0	0	1	1	0	1	1	1	1	0
Peak4028	2R	7342302	7343629	CDS	0.693977	0	1	0	0	0	0	0	0	0	0	0	0	0	0	0	0	0	1	0	0	0	0	0	0	0	0	0	0
Peak4038	2R	7399229	7399628	intergenic	1.7152	0	1	1	1	1	0	0	0	0	0	0	0	0	0	0	0	0	0	0	0	0	0	0	0	0	0	0	0
Peak4040	2R	7412190	7412680	CDS	0.608655	0	1	0	0	0	0	0	0	0	0	0	0	0	0	0	0	0	0	0	0	0	0	0	0	0	0	0	0
Peak4041	2R	7413294	7413819	intron	0.799505	0	1	0	0	0	1	0	0	0	0	0	0	0	0	1	0	1	1	0	0	0	0	0	0	0	0	0	0
Peak4043	2R	7416876	7417472	intergenic	0.529132	0	1	0	0	0	0	0	0	0	0	0	0	0	0	1	0	1	0	0	0	0	0	0	0	0	0	0	0
Peak4044	2R	7419754	7420495	intergenic	0.457227	0	1	0	0	0	0	0	0	0	1	0	0	1	0	1	1	1	1	1	0	0	1	0	0	0	0	0	0
Peak4046	2R	7424815	7425270	intergenic	0.789226	0	1	0	0	0	0	0	0	0	0	0	0	1	0	0	0	0	1	0	0	0	0	0	0	1	0	1	0
Peak4047	2R	7434045	7434663	intergenic	0.667512	0	1	0	0	0	1	0	0	0	0	0	0	0	0	1	0	1	1	0	0	0	0	0	0	0	0	0	0
Peak4049	2R	7443310	7443660	intergenic	0.683673	0	1	1	0	0	0	0	0	0	0	0	0	0	0	0	0	0	0	1	1	0	0	0	0	0	0	0	0
Peak4050	2R	7448518	7448741	intergenic	0.943018	0	1	1	1	0	1	1	0	0	0	0	0	0	0	0	0	0	1	0	0	0	0	0	0	0	0	0	0
Peak4051	2R	7453213	7453445	intergenic	0.780864	0	1	1	0	0	0	0	0	0	0	0	0	0	0	1	0	0	1	0	0	0	0	0	0	0	0	0	0
Peak4052	2R	7454360	7454803	intergenic	0.899496	0	1	0	0	0	1	0	0	0	0	0	0	0	0	1	1	1	1	0	0	1	0	0	0	0	0	0	0
Peak4054	2R	7464575	7464816	intergenic	0.453723	0	1	0	0	0	0	0	0	0	0	0	0	0	0	1	0	1	1	0	0	0	0	0	0	0	0	0	0
Peak4055	2R	7465286	7465868	UTR	0.461658	0	1	0	0	0	0	0	0	0	0	0	0	1	0	0	0	0	1	0	0	0	0	0	0	0	0	0	0
Peak4058	2R	7467749	7469978	CDS	0.369517	0	1	1	0	0	1	0	0	0	1	0	0	1	0	1	1	1	1	1	1	1	1	0	0	0	0	0	0
Peak4059	2R	7470271	7471195	CDS	0.491059	0	1	0	0	0	0	0	0	0	0	0	0	0	0	1	0	1	1	1	0	0	0	0	0	0	0	0	0
Peak4061	2R	7472296	7472794	CDS	0.436391	0	1	1	0	0	0	0	0	0	0	0	0	0	0	0	0	0	0	0	0	0	0	0	0	0	0	0	0
Peak4062	2R	7473251	7473789	CDS	0.758456	0	1	0	1	0	0	0	0	0	0	0	0	0	0	0	0	0	0	0	0	0	0	0	0	0	0	0	0
Peak4063	2R	7474151	7474448	CDS	0.635449	0	1	1	0	0	0	0	1	0	0	0	0	0	0	1	0	1	1	1	0	1	1	0	0	0	0	0	0
Peak4070	2R	7488335	7489433	intron	0.704474	0	1	0	0	0	0	0	1	0	1	0	0	1	0	0	0	0	0	0	0	0	0	0	0	0	0	0	0
Peak4075	2R	7493521	7494076	intron	0.735164	0	1	1	0	0	0	0	0	0	0	0	0	0	0	0	0	0	1	0	0	0	1	0	0	0	0	0	0
Peak4077	2R	7496447	7497372	intron	0.849753	0	1	0	0	0	0	0	0	0	0	0	0	0	0	0	0	0	0	0	0	0	0	0	0	0	0	0	0
Peak4096	2R	7522184	7522548	intron	0.759021	0	1	1	0	0	0	0	0	0	0	0	0	0	0	1	1	0	1	1	1	0	1	0	0	0	0	0	0
Peak4097	2R	7522718	7522984	intron	0.969706	0	1	0	0	0	0	0	0	0	0	0	0	0	0	0	1	0	1	0	0	0	0	0	0	0	0	0	0
Peak4100	2R	7525664	7526386	intron	0.538842	0	1	1	1	1	0	0	0	0	0	0	0	0	0	0	0	0	0	0	0	0	0	0	0	0	0	0	0
Peak4103	2R	7532232	7532548	CDS	1.18993	0	1	0	0	1	0	0	1	0	0	1	0	0	1	1	1	1	0	0	1	0	0	0	0	1	0	1	0
Peak4110	2R	7554087	7554378	intron	1.04662	0	1	0	0	0	0	0	1	0	0	0	0	0	0	0	0	0	0	0	0	0	0	0	0	0	0	0	0
Peak4120	2R	7620417	7621198	intergenic	0.623103	0	1	0	0	0	0	0	0	0	0	0	0	0	0	0	0	0	0	0	0	0	0	0	0	0	0	0	0
Peak4121	2R	7624117	7624591	intergenic	0.681776	0	1	1	1	0	0	0	0	0	0	0	0	0	0	0	0	0	0	0	0	0	0	0	0	0	0	0	0
Peak4123	2R	7642574	7642869	intergenic	0.964909	0	1	1	0	0	0	0	0	0	0	0	0	0	0	0	0	0	0	0	0	0	0	0	0	0	0	0	0
Peak4125	2R	7677368	7678063	promoter	0.58638	0	1	0	0	0	0	0	0	0	0	0	0	0	0	1	0	0	1	0	0	0	0	0	0	0	0	0	0
Peak4127	2R	7682974	7684126	intron	0.758286	0	1	1	0	0	0	0	0	0	0	0	0	0	0	0	0	0	0	0	0	0	0	0	0	0	0	0	0
Peak4129	2R	7687416	7688146	intron	1.07432	0	1	0	0	0	0	0	0	0	0	0	0	0	0	1	0	1	1	0	0	0	0	0	0	0	0	0	0
Peak4131	2R	7698391	7699149	CDS	0.36731	0	1	0	0	0	0	0	0	0	0	0	0	0	0	1	0	0	1	0	0	0	0	0	0	0	0	0	0
Peak4133	2R	7725744	7726035	intron	0.636891	0	1	0	0	0	0	0	0	0	0	0	0	1	0	1	0	1	1	0	0	0	1	0	0	1	0	1	0
Peak4138	2R	7755664	7755942	CDS	1.12994	0	1	0	0	0	0	0	0	0	0	0	0	1	0	0	0	0	1	0	0	0	0	0	0	1	0	1	0
Peak4152	2R	7866027	7866468	CDS	0.874134	0	1	1	0	0	0	0	0	0	0	0	0	0	0	0	0	0	0	0	0	0	0	0	0	0	0	0	0
Peak4153	2R	7866873	7867257	CDS	0.922326	0	1	1	0	0	1	0	0	0	0	0	0	0	0	0	0	0	0	0	0	0	0	0	0	0	0	0	0
Peak4158	2R	7904847	7905658	intron	0.949905	0	1	0	0	0	0	0	0	0	0	0	0	0	0	0	0	1	1	0	0	0	0	0	0	0	0	0	0
Peak4159	2R	7905710	7906241	intron	0.641894	0	1	0	0	0	0	0	0	0	0	0	0	0	0	0	0	0	0	0	0	0	0	0	0	0	0	0	0
Peak4163	2R	7914173	7915642	promoter	0.51148	0	1	0	0	0	0	0	0	0	0	0	0	0	0	1	1	0	1	0	0	0	1	0	0	0	0	0	0
Peak4168	2R	8001248	8001455	intron	0.640141	0	1	0	0	0	0	0	0	0	0	0	0	0	0	0	0	0	0	0	0	0	0	0	0	0	0	0	0
Peak4170	2R	8006257	8007083	promoter	0.393529	0	1	0	0	0	0	0	0	0	0	0	0	0	0	1	0	0	1	0	0	0	0	0	0	0	0	0	0
Peak4190	2R	8096428	8096992	CDS	1.05652	0	1	0	0	0	1	0	0	0	0	0	0	0	0	1	0	1	1	0	0	0	0	0	0	0	0	0	0
Peak4205	2R	8225179	8225881	promoter	0.392639	0	1	0	0	0	0	0	0	0	0	0	0	0	1	1	0	1	1	0	0	0	0	0	0	0	0	0	0
Peak4211	2R	8236183	8236825	CDS	0.564773	0	1	0	0	0	0	0	1	0	0	0	0	0	0	0	0	1	1	0	0	0	0	0	1	0	0	0	0
Peak4214	2R	8312959	8313213	promoter	0.456804	0	1	0	0	0	0	0	0	0	0	0	0	0	0	0	0	0	0	0	0	0	0	0	0	0	0	0	0
Peak4217	2R	8324633	8325666	promoter	0.46927	0	1	1	0	0	0	0	0	0	0	0	0	0	0	0	0	0	0	0	0	0	0	0	0	0	0	0	0
Peak4220	2R	8337328	8338100	CDS	0.737699	0	1	0	0	0	0	0	0	0	0	0	0	0	0	0	0	0	0	0	0	0	0	0	0	0	0	0	0
Peak4221	2R	8338404	8339292	CDS	0.51822	0	1	1	0	1	1	0	0	0	0	0	0	1	0	0	0	0	1	0	0	0	1	0	0	1	0	1	1
Peak4227	2R	8382349	8382595	intron	0.975144	0	1	0	0	0	0	0	0	0	0	0	0	0	0	0	0	0	0	0	0	0	0	0	0	0	0	0	0
Peak4232	2R	8417792	8418721	intron	0.598603	0	1	0	0	0	0	0	0	0	0	0	0	0	1	1	0	0	1	0	0	0	0	0	0	0	0	0	0
Peak4233	2R	8419324	8420047	intron	0.958015	0	1	0	0	0	0	0	0	0	0	0	0	0	0	1	0	0	1	0	0	0	0	0	0	0	0	0	0
Peak4234	2R	8420393	8420949	intron	0.608515	0	1	0	1	0	0	0	0	0	0	0	0	0	0	0	0	0	0	0	0	0	0	0	0	1	0	0	0
Peak4236	2R	8423011	8423411	intron	0.63749	0	1	0	0	0	0	0	0	0	0	0	0	0	0	0	0	1	0	0	0	0	0	0	0	0	0	0	0
Peak4237	2R	8423658	8423873	intron	1.46318	0	1	1	0	0	0	0	0	0	0	0	0	0	0	0	0	0	0	0	0	0	0	0	0	0	0	0	0
Peak4239	2R	8430919	8431272	intron	0.53896	0	1	0	0	0	0	0	0	0	0	0	0	0	0	0	0	0	0	0	0	0	0	0	0	0	0	0	0
Peak4242	2R	8436251	8436557	intron	0.762459	0	1	0	0	0	0	0	0	0	0	0	0	0	0	0	0	0	0	0	0	0	0	0	0	0	0	0	0
Peak4243	2R	8442166	8442381	intron	1.78738	0	1	0	0	0	0	0	0	0	0	0	0	0	0	0	0	0	1	0	0	0	0	0	0	0	0	0	0
Peak4244	2R	8442548	8443009	intron	0.950744	0	1	0	0	0	1	0	0	0	0	0	0	0	0	0	0	0	1	0	0	0	0	0	0	0	0	0	0
Peak4246	2R	8444249	8444597	CDS	0.639879	0	1	0	0	0	0	0	0	0	0	0	0	0	1	0	0	0	1	0	0	0	0	0	0	0	0	0	0
Peak4249	2R	8461456	8462281	CDS	0.551048	0	1	1	0	1	0	0	0	0	1	1	0	1	0	1	1	1	1	1	1	0	1	0	0	0	0	0	0
Peak4274	2R	8573567	8573810	promoter	0.388402	0	1	0	0	0	0	0	0	0	0	0	0	0	0	0	0	0	0	0	0	0	0	0	0	0	0	0	0
Peak4279	2R	8618021	8618256	intron	0.938456	0	1	0	0	0	0	0	0	0	0	0	0	0	0	0	0	0	0	0	0	0	0	0	0	0	0	0	0
Peak4286	2R	8663148	8663968	intergenic	0.67787	0	1	0	0	0	0	0	1	0	0	1	0	0	0	0	0	0	0	0	0	0	0	0	0	0	0	0	0
Peak4290	2R	8672101	8672506	CDS	0.628541	0	1	0	0	0	0	0	0	0	0	0	0	0	0	1	1	1	1	0	0	0	0	0	0	0	0	0	0
Peak4291	2R	8687597	8688480	CDS	0.547072	0	1	0	0	0	0	0	0	0	0	0	0	0	0	1	0	0	1	0	0	0	0	0	0	0	0	0	0
Peak4292	2R	8724653	8724942	intergenic	0.805221	0	1	1	1	1	0	1	0	0	0	0	0	1	0	0	0	1	1	0	0	0	1	0	0	1	0	1	0
Peak4310	2R	8793801	8794029	intergenic	0.558067	0	1	0	0	1	0	0	0	0	0	0	0	0	0	0	0	0	1	0	0	0	1	0	0	1	0	1	0
Peak4311	2R	8801097	8801501	intergenic	0.453589	0	1	0	0	1	0	0	0	0	0	0	0	1	0	0	0	0	1	0	0	0	0	0	0	0	0	1	0
Peak4312	2R	8801806	8802831	intergenic	0.695464	0	1	1	0	0	0	0	0	0	0	0	0	0	0	0	0	0	0	0	0	0	0	0	0	0	0	0	0
Peak4319	2R	8835241	8835662	intergenic	0.428521	0	1	1	0	0	0	0	0	0	0	0	0	0	0	0	0	0	1	0	0	0	1	0	0	0	0	0	0
Peak4325	2R	8852668	8853580	intergenic	0.40157	0	1	0	0	0	0	0	0	0	0	0	0	0	0	0	0	0	0	0	0	0	0	0	0	0	0	0	0
Peak4330	2R	8857336	8857733	CDS	0.623716	0	1	1	0	0	1	0	0	0	0	0	0	0	1	1	0	1	1	0	0	0	0	0	0	0	0	0	0
Peak4331	2R	8857791	8858773	CDS	0.642529	0	1	1	1	1	1	0	0	0	0	0	0	0	0	0	0	0	1	0	0	0	0	0	0	0	0	0	0
Peak4332	2R	8859109	8859765	intron	0.570956	0	1	0	0	0	1	0	0	0	0	0	1	1	0	1	0	1	1	0	0	0	1	0	0	1	1	1	0
Peak4333	2R	8860928	8861498	intron	0.702975	0	1	0	0	0	0	0	0	0	0	0	0	0	0	1	0	1	1	0	0	0	0	0	0	0	0	0	0
Peak4336	2R	8866747	8867365	intron	0.916887	0	1	1	1	0	1	1	0	0	0	0	1	1	0	0	0	0	0	0	1	0	0	1	0	0	1	1	0
Peak4345	2R	8915865	8916446	intergenic	0.799682	0	1	0	0	0	0	0	0	0	0	0	0	0	0	1	0	0	0	0	0	0	0	0	0	0	0	0	0
Peak4347	2R	8926275	8926694	intergenic	0.445599	0	1	0	0	0	0	0	0	0	0	0	0	0	0	0	0	0	0	0	0	0	0	0	0	0	0	0	0
Peak4364	2R	9078791	9079779	intron	0.467746	0	1	0	0	0	0	0	0	0	0	0	0	0	0	0	0	0	1	0	0	0	0	0	0	0	0	0	0
Peak4365	2R	9080068	9080639	intron	0.654295	0	1	0	0	0	0	0	0	0	0	0	0	0	0	1	0	0	1	0	0	0	0	0	0	0	0	0	0
Peak4377	2R	9112436	9112956	promoter	0.663331	0	1	1	0	0	0	0	0	0	0	0	0	0	0	0	0	0	0	0	0	0	0	0	0	0	0	0	0
Peak4378	2R	9113016	9114726	CDS	0.43669	0	1	1	0	0	0	0	1	0	0	0	0	0	1	1	0	1	1	0	0	0	0	0	0	0	0	0	0
Peak4383	2R	9126754	9128206	promoter	0.592792	0	1	0	0	0	1	0	0	0	0	0	0	0	0	1	0	1	1	0	0	0	0	0	0	0	0	0	0
Peak4389	2R	9230131	9230600	intron	0.624895	0	1	0	0	0	0	0	0	0	0	0	0	0	0	0	0	0	0	0	0	0	0	0	0	0	0	0	0
Peak4395	2R	9334634	9335832	CDS	0.419993	0	1	0	0	0	0	0	0	0	0	0	0	0	0	0	1	0	1	0	0	0	0	0	0	0	0	0	0
Peak4399	2R	9352577	9352939	intron	0.609747	0	1	0	1	0	0	0	0	0	0	0	0	0	0	0	0	0	0	0	0	0	0	0	0	0	0	0	0
Peak4402	2R	9360991	9361397	intron	0.718212	0	1	1	0	0	1	0	0	0	0	0	0	0	0	0	1	0	0	0	1	0	0	0	0	0	0	0	0
Peak4403	2R	9363825	9364301	intron	0.779596	0	1	0	0	0	0	0	0	0	0	0	0	0	0	0	0	0	0	0	0	0	0	0	0	0	0	0	0
Peak4404	2R	9364520	9364719	intron	0.826683	0	1	0	1	0	0	0	0	0	0	0	0	0	0	0	0	0	1	0	0	0	0	0	0	0	0	0	0
Peak4412	2R	9387864	9388614	intron	0.502966	0	1	1	0	0	0	0	0	0	0	0	0	0	0	0	0	1	1	0	0	0	0	0	0	0	0	0	0
Peak4424	2R	9428313	9428696	intron	1.04801	0	1	0	1	0	0	0	0	0	0	0	0	0	0	0	0	0	0	0	0	0	0	0	0	0	0	0	0
Peak4434	2R	9459062	9459584	CDS	0.470913	0	1	0	0	0	0	0	0	0	0	0	0	0	0	1	0	0	1	0	0	0	0	0	0	0	0	0	0
Peak4436	2R	9463470	9464028	intergenic	0.670803	0	1	0	0	1	0	0	0	0	0	0	0	1	0	0	0	1	1	0	0	0	0	0	0	1	1	1	0
Peak4438	2R	9467077	9467800	intergenic	0.937151	0	1	0	0	0	1	0	0	0	0	0	0	0	0	1	1	1	0	0	0	0	0	0	0	0	0	1	0
Peak4445	2R	9505003	9505503	intergenic	1.37389	0	1	0	0	0	0	0	0	0	0	0	0	0	0	0	0	0	0	0	0	0	0	0	0	0	0	0	0
Peak4450	2R	9603779	9604061	intron	1.84481	0	1	1	0	0	0	0	0	0	0	0	0	1	0	1	0	0	1	1	0	0	1	0	0	0	0	0	0
Peak4460	2R	9787588	9787916	intron	0.831345	0	1	1	0	0	0	0	0	0	0	0	0	1	0	1	1	1	1	1	1	1	1	0	0	0	0	0	0
Peak4461	2R	9788228	9788529	intron	1.27326	0	1	1	0	0	0	0	0	0	1	1	0	1	0	1	1	1	1	1	1	0	1	0	0	0	0	0	0
Peak4462	2R	9798431	9799103	promoter	0.598947	0	1	1	0	0	0	0	0	0	0	0	0	0	0	0	0	0	1	0	0	0	1	0	0	0	0	0	0
Peak4465	2R	9811524	9811928	intron	0.727647	0	1	0	0	0	0	1	0	0	0	0	0	1	0	1	0	1	1	0	0	0	1	0	0	1	0	0	0
Peak4470	2R	9823649	9824268	intron	0.573104	0	1	1	0	0	0	0	0	0	1	0	0	0	0	1	1	0	1	1	1	0	1	0	0	0	0	0	0
Peak4471	2R	9827193	9828001	intron	0.39418	0	1	1	0	1	0	0	0	0	1	1	0	1	0	1	1	1	1	1	1	0	1	0	0	0	0	0	0
Peak4483	2R	9851824	9852765	promoter	0.579445	0	1	1	0	0	1	0	0	0	0	0	0	0	0	0	1	0	0	0	1	0	0	0	0	0	0	0	0
Peak4488	2R	9865907	9866265	intron	0.809617	0	1	0	0	0	0	0	0	0	0	0	0	0	0	0	0	0	1	0	0	0	0	0	0	1	0	1	0
Peak4489	2R	9866949	9867211	promoter	0.59033	0	1	0	0	0	0	0	0	0	0	0	0	0	0	1	0	0	0	0	0	0	0	0	0	0	0	0	0
Peak4498	2R	9886055	9886404	intron	0.88229	0	1	0	0	0	0	0	0	0	0	0	0	0	1	1	0	0	0	0	0	0	0	0	0	0	0	0	0
Peak4501	2R	9890223	9890537	intron	0.718905	0	1	0	1	0	0	0	1	0	0	0	0	0	1	0	0	0	1	0	0	0	0	0	0	0	0	0	0
Peak4502	2R	9890684	9891089	intron	0.548401	0	1	0	0	0	0	0	0	0	0	0	0	0	0	1	0	0	1	0	0	0	0	0	0	0	0	0	0
Peak4511	2R	9912159	9912571	intron	0.690752	0	1	0	0	0	0	0	0	0	1	0	0	1	0	1	1	0	1	1	0	0	1	0	0	0	0	0	0
Peak4518	2R	9931698	9932035	intron	0.537208	0	1	1	0	0	0	0	0	0	0	0	0	0	0	0	0	0	0	0	0	0	0	0	0	0	0	0	0
Peak4520	2R	9956655	9957008	CDS	0.670064	0	1	1	0	0	0	0	0	0	0	0	0	0	0	1	1	0	0	1	1	0	0	0	0	0	0	0	0
Peak4522	2R	10012299	10012667	intron	1.02101	0	1	0	1	0	0	0	0	0	0	0	0	0	0	0	0	0	0	0	0	0	0	0	0	0	0	0	0
Peak4537	2R	10083444	10083881	CDS	0.724853	0	1	1	0	0	0	0	0	0	0	0	0	0	0	0	0	0	0	0	1	0	1	0	0	0	0	0	0
Peak4539	2R	10095109	10096282	intron	0.643126	0	1	0	0	0	0	0	0	0	0	0	0	1	0	0	1	0	1	0	0	0	0	0	0	0	0	0	0
Peak4562	2R	10178379	10179095	promoter	0.715433	0	1	0	0	1	0	0	0	0	0	0	0	1	0	0	0	1	1	0	1	0	0	0	0	1	0	1	0
Peak4570	2R	10207274	10207587	intron	0.437047	0	1	0	0	0	0	0	0	0	0	0	0	0	0	0	0	0	1	0	0	0	0	0	0	1	0	1	0
Peak4572	2R	10209935	10210284	intron	0.59468	0	1	0	0	0	0	0	0	0	0	0	0	1	0	0	0	0	1	0	0	0	0	0	0	1	0	1	0
Peak4573	2R	10213312	10213579	CDS	0.664069	0	1	0	0	0	0	0	0	0	0	0	0	0	0	0	0	0	1	0	0	0	0	0	0	1	0	1	0
Peak4576	2R	10220938	10222279	intron	0.459982	0	1	0	0	0	0	0	0	0	0	0	0	1	0	0	0	0	1	0	0	0	1	0	0	1	0	1	0
Peak4580	2R	10231927	10232297	intron	0.663753	0	1	0	0	0	0	0	0	0	0	0	0	0	1	0	0	0	1	0	0	0	0	0	0	1	0	1	0
Peak4583	2R	10235601	10235871	intron	0.985633	0	1	0	0	0	0	0	0	0	0	0	0	1	0	0	0	0	1	0	0	0	1	0	0	1	0	1	0
Peak4584	2R	10238760	10239200	CDS	0.379491	0	1	0	0	0	0	0	0	0	0	0	0	0	0	1	0	1	1	0	0	0	0	0	0	0	0	1	0
Peak4588	2R	10252732	10253075	CDS	0.570516	0	1	0	0	0	0	0	0	0	0	0	0	1	0	1	0	0	1	0	0	0	1	0	0	0	0	0	0
Peak4593	2R	10316511	10317867	intron	0.413995	0	1	0	0	0	0	0	0	0	0	0	0	0	0	1	1	0	1	0	0	0	0	0	0	0	0	0	0
Peak4595	2R	10320618	10321466	intergenic	0.467769	0	1	1	0	0	0	0	0	0	0	0	0	0	0	0	0	0	0	0	0	0	0	0	0	0	0	0	0
Peak4597	2R	10331497	10331741	intron	0.599676	0	1	1	1	1	0	0	0	0	0	0	0	0	0	0	0	0	0	0	0	0	0	0	0	1	0	0	0
Peak4598	2R	10341399	10341701	intron	2.36433	0	1	0	0	0	0	0	0	0	0	0	0	1	0	1	0	1	1	0	0	0	1	0	0	1	0	1	0
Peak4599	2R	10342437	10342848	intron	1.20644	0	1	0	0	0	0	0	0	0	0	0	0	0	1	1	0	1	1	0	0	0	0	1	0	0	0	1	0
Peak4613	2R	10396100	10397104	CDS	0.517075	0	1	0	0	0	0	0	0	0	0	0	0	0	0	0	0	0	1	0	0	0	0	0	0	0	0	0	0
Peak4614	2R	10397802	10398036	CDS	0.560057	0	1	0	0	0	0	0	0	0	0	0	0	0	0	1	0	0	1	0	0	0	0	0	0	0	0	0	0
Peak4643	2R	10680224	10680582	intron	2.06107	0	1	1	0	0	1	0	0	0	1	1	1	1	0	1	1	1	1	1	1	1	1	0	0	0	0	0	0
Peak4644	2R	10686273	10686769	promoter	1.03487	0	1	1	0	0	0	0	0	0	0	0	0	0	0	0	1	0	0	0	1	0	0	0	0	0	0	1	0
Peak4645	2R	10686995	10687311	intron	0.599425	0	1	0	0	1	0	0	0	0	0	0	0	1	0	0	0	0	1	0	0	0	1	0	0	1	1	1	0
Peak4646	2R	10687588	10688008	intron	1.39575	0	1	1	0	0	0	0	0	0	0	1	0	0	0	1	1	0	1	0	1	0	0	0	0	0	0	0	0
Peak4647	2R	10704530	10704942	intergenic	0.595282	0	1	0	0	0	0	0	0	0	0	0	0	0	0	0	0	0	1	0	0	0	0	0	0	0	0	0	0
Peak4662	2R	10786616	10786954	promoter	0.664889	0	1	0	0	0	0	0	0	0	0	0	0	1	0	0	0	0	1	0	0	0	0	0	0	0	0	0	0
Peak4663	2R	10798836	10799219	intron	0.795279	0	1	0	0	0	1	0	0	0	1	1	0	0	0	1	1	1	0	0	1	0	0	0	0	0	0	0	0
Peak4666	2R	10815502	10816165	promoter	0.569289	0	1	1	0	1	0	0	0	0	1	1	0	1	0	1	1	1	1	1	1	1	1	0	0	0	0	0	0
Peak4667	2R	10816568	10817072	intergenic	0.72643	0	1	1	0	0	0	0	0	0	0	1	0	0	0	0	1	0	0	0	1	0	0	0	0	0	0	0	0
Peak4679	2R	10862883	10863788	intron	0.859986	0	1	0	0	0	0	0	0	0	1	0	0	1	0	0	0	0	1	0	0	0	0	0	0	0	0	0	0
Peak4688	2R	10874047	10874523	intron	1.06781	0	1	0	0	0	0	0	0	0	0	0	0	1	0	0	0	0	1	0	0	0	1	0	0	0	0	0	0
Peak4694	2R	10896389	10896880	intergenic	1.24912	0	1	0	0	0	0	0	0	0	0	0	0	0	0	0	0	0	0	0	0	0	0	0	0	0	0	0	0
Peak4695	2R	10898120	10898532	intergenic	0.552169	0	1	0	0	0	0	0	0	0	0	0	0	0	0	0	0	0	1	0	0	0	0	0	0	0	0	0	0
Peak4699	2R	10920084	10920863	intron	0.392568	0	1	1	0	0	0	0	0	0	0	0	0	0	0	0	0	0	0	0	0	0	0	0	0	0	0	0	0
Peak4700	2R	10921291	10921887	intron	0.646606	0	1	0	0	0	0	0	0	0	0	0	0	0	0	1	1	0	1	1	0	0	0	0	0	0	0	0	0
Peak4701	2R	10922655	10923009	intron	1.2375	0	1	1	0	0	0	0	0	0	0	0	0	0	0	0	0	0	1	0	0	0	1	0	0	0	0	0	0
Peak4702	2R	10937188	10937521	intergenic	0.861234	0	1	0	0	0	0	0	0	0	0	0	0	0	0	0	0	0	1	0	0	0	0	0	0	0	0	0	0
Peak4703	2R	10986963	10987862	intergenic	0.789685	0	1	0	0	0	1	0	0	0	0	0	1	0	0	1	0	1	1	0	0	0	0	0	0	0	1	0	0
Peak4704	2R	10987934	10988201	intergenic	0.887027	0	1	0	0	0	0	0	0	0	0	0	0	0	0	1	0	0	0	0	0	0	0	0	0	0	0	0	0
Peak4708	2R	11005597	11006024	intron	0.58641	0	1	1	0	0	0	0	0	0	0	0	0	0	0	1	0	0	1	0	0	0	1	0	0	0	0	0	0
Peak4717	2R	11025601	11026443	CDS	0.336217	0	1	1	0	0	1	0	0	0	1	1	1	1	0	1	1	1	1	1	1	1	1	0	0	0	0	0	0
Peak4718	2R	11026611	11027589	CDS	0.374529	0	1	0	0	0	1	0	0	0	0	0	0	0	0	0	0	0	0	0	0	0	0	0	0	0	0	0	0
Peak4723	2R	11030069	11030972	CDS	0.341593	0	1	1	0	0	0	0	0	0	0	1	0	0	0	0	1	0	0	1	1	0	1	0	0	0	0	0	0
Peak4728	2R	11103553	11104102	promoter	0.362018	0	1	0	0	0	0	0	0	0	0	0	0	0	0	0	0	0	1	0	0	0	0	0	0	0	0	0	0
Peak4732	2R	11133539	11133837	intergenic	1.81008	0	1	0	0	0	0	0	0	0	0	0	0	0	0	1	1	1	1	0	0	0	0	0	0	0	0	0	0
Peak4734	2R	11139927	11140302	promoter	1.21419	0	1	0	0	0	0	0	0	0	0	0	0	1	0	1	1	1	1	0	0	0	1	0	0	0	0	0	0
Peak4738	2R	11204931	11205185	CDS	0.894803	0	1	0	0	0	0	0	0	0	0	0	0	0	0	0	0	1	1	0	0	0	0	0	0	0	0	0	0
Peak4744	2R	11224574	11224995	CDS	0.507742	0	1	1	0	0	0	0	0	0	0	0	0	1	0	0	0	0	1	0	0	0	1	0	0	0	0	0	0
Peak4749	2R	11239392	11240571	intron	0.690527	0	1	0	0	1	1	0	0	0	0	1	0	0	0	0	0	0	1	0	1	0	1	0	0	1	0	1	1
Peak4750	2R	11240756	11241134	intron	0.531269	0	1	1	0	0	0	0	0	0	0	0	0	0	0	0	0	0	0	0	0	0	0	0	0	0	0	0	0
Peak4751	2R	11243223	11243642	intron	0.745501	0	1	0	0	0	0	0	0	0	0	0	0	0	0	0	1	0	0	0	0	0	0	0	0	0	0	0	0
Peak4752	2R	11243777	11243937	intron	1.48607	0	1	0	0	0	0	0	0	0	0	0	0	0	0	0	0	0	1	0	0	0	0	0	0	0	0	0	0
Peak4753	2R	11244102	11244632	CDS	0.887014	0	1	0	0	0	0	0	0	0	0	0	0	0	0	0	0	1	0	0	0	0	0	0	0	0	0	0	0
Peak4762	2R	11369693	11370016	CDS	0.993342	0	1	0	0	0	0	0	0	0	0	0	0	0	0	0	0	0	0	0	0	0	0	0	0	0	0	0	0
Peak4764	2R	11405983	11406606	CDS	0.517369	0	1	0	0	0	0	0	0	0	1	0	0	0	0	1	1	0	1	1	0	0	0	0	0	0	0	0	0
Peak4768	2R	11417518	11418311	intron	0.490137	0	1	0	1	0	1	0	0	0	1	0	0	0	0	0	0	0	0	1	0	0	0	0	0	0	0	0	0
Peak4776	2R	11456223	11456626	promoter	0.453894	0	1	0	0	0	0	0	0	0	0	0	0	0	0	1	0	0	1	0	0	0	0	0	0	0	0	0	0
Peak4779	2R	11487878	11488194	intergenic	0.61591	0	1	0	0	0	1	0	0	0	0	0	0	0	0	0	0	0	1	0	0	0	0	0	0	0	0	0	0
Peak4781	2R	11501119	11501432	promoter	0.681605	0	1	0	0	0	0	0	0	0	0	0	0	1	0	1	0	0	1	0	0	0	1	0	0	0	0	1	0
Peak4782	2R	11549739	11550049	CDS	0.589094	0	1	0	0	0	0	0	0	0	0	0	0	0	0	0	0	0	1	0	0	0	1	0	0	0	0	0	0
Peak4783	2R	11557788	11558101	intron	0.910881	0	1	0	0	0	0	0	0	0	0	0	0	0	0	0	0	0	1	0	0	0	0	0	0	0	0	0	0
Peak4802	2R	11635422	11635876	intron	0.560463	0	1	0	0	0	0	0	0	0	0	0	0	0	0	0	0	0	1	0	0	0	0	0	0	0	0	0	0
Peak4804	2R	11638063	11638857	intron	0.363375	0	1	0	0	0	0	0	0	0	0	0	0	0	0	0	0	0	1	0	0	0	0	0	0	0	0	0	0
Peak4806	2R	11642246	11643735	CDS	0.722328	0	1	0	0	0	0	0	0	0	0	0	0	0	0	1	0	0	1	0	0	0	0	0	0	0	0	0	0
Peak4807	2R	11643829	11644628	intron	0.796532	0	1	1	0	0	0	0	0	0	0	0	0	0	0	0	0	0	1	0	0	0	0	0	0	0	0	0	0
Peak4808	2R	11645867	11646231	intron	0.578541	0	1	0	0	0	0	0	0	0	0	0	0	0	0	0	0	0	1	0	0	0	0	0	0	0	0	0	0
Peak4809	2R	11646941	11647989	intron	0.487532	0	1	0	0	0	0	0	1	0	0	1	0	0	1	1	0	0	1	0	1	0	0	0	0	0	0	0	0
Peak4811	2R	11649251	11650068	UTR	0.370682	0	1	0	0	0	0	0	0	0	0	0	0	0	0	1	0	0	1	0	0	0	0	0	0	0	0	0	0
Peak4812	2R	11677440	11677694	intron	0.821517	0	1	1	0	0	0	0	0	0	0	0	0	0	0	0	1	0	0	1	1	0	1	0	0	0	0	0	0
Peak4813	2R	11677841	11678854	intron	0.421865	0	1	1	1	1	1	0	0	0	1	0	0	0	0	0	0	0	0	0	0	0	0	0	0	0	0	0	0
Peak4815	2R	11682784	11683239	intron	0.720773	0	1	0	0	0	0	0	0	0	0	0	0	0	0	0	0	0	0	0	0	0	0	0	0	0	0	0	0
Peak4820	2R	11701304	11701757	intron	0.821851	0	1	0	0	0	0	0	0	0	0	0	0	0	0	0	0	0	0	0	0	0	0	0	0	0	0	0	0
Peak4826	2R	11722360	11722965	promoter	0.852605	0	1	1	0	0	1	0	0	0	1	1	1	1	0	0	0	1	1	0	1	1	1	0	0	0	0	0	0
Peak4828	2R	11735419	11735774	intron	0.32407	0	1	0	0	0	0	0	0	0	0	0	0	0	0	0	0	0	0	0	0	0	0	0	0	0	0	0	0
Peak4829	2R	11748954	11749595	promoter	0.594289	0	1	0	0	0	1	0	0	0	0	0	0	0	0	0	0	1	1	0	0	0	0	0	0	0	0	0	0
Peak4830	2R	11750151	11750883	promoter	0.63535	0	1	1	0	0	1	0	0	0	0	1	1	1	0	0	1	1	1	0	1	1	1	0	0	0	0	0	0
Peak4833	2R	11752574	11754626	CDS	0.508962	0	1	1	0	0	1	1	0	0	1	0	1	1	0	1	1	1	1	1	1	1	1	0	0	0	0	1	0
Peak4836	2R	11758727	11761335	CDS	0.402544	0	1	0	0	0	0	0	0	0	0	0	0	0	0	0	0	0	0	0	0	0	0	0	0	0	0	0	0
Peak4838	2R	11762439	11763850	CDS	0.404291	0	1	1	0	0	0	1	0	0	0	0	0	1	0	1	0	0	1	0	0	0	1	0	0	1	0	1	0
Peak4854	2R	11779426	11779941	intron	0.718063	0	1	1	1	1	1	1	0	0	1	1	1	1	0	1	1	1	1	1	1	1	1	0	0	0	0	0	0
Peak4858	2R	11786598	11787857	intron	0.408384	0	1	1	1	0	0	0	0	0	0	0	0	0	0	0	1	1	0	0	0	0	0	0	0	0	0	0	0
Peak4859	2R	11788187	11789562	intron	0.514001	0	1	0	0	0	0	0	0	0	0	0	0	0	0	0	0	0	0	0	0	0	0	0	0	0	0	0	0
Peak4864	2R	11799063	11799865	intron	0.544433	0	1	0	0	0	0	0	0	0	0	0	0	0	0	0	0	0	0	0	0	0	0	0	0	0	0	0	0
Peak4869	2R	11808601	11809170	intron	0.342278	0	1	0	0	0	0	0	0	0	0	0	0	0	0	0	0	0	0	0	0	0	0	0	0	0	0	0	0
Peak4872	2R	11810766	11811307	CDS	0.353925	0	1	0	0	0	0	0	0	0	0	0	0	0	0	0	0	0	0	0	0	0	0	0	0	0	0	0	0
Peak4889	2R	11889093	11890285	promoter	0.357199	0	1	0	0	0	0	0	1	0	0	0	0	0	0	1	0	1	1	0	0	0	1	0	0	0	0	0	0
Peak4892	2R	11898523	11899077	promoter	0.499281	0	1	1	0	0	0	0	0	0	0	0	0	0	0	1	0	1	1	0	0	1	1	0	0	0	0	0	0
Peak4895	2R	11918530	11918858	intergenic	0.747113	0	1	0	1	1	0	0	0	0	0	0	0	0	0	0	0	0	0	0	0	0	0	0	0	0	0	0	0
Peak4898	2R	11974211	11974534	intron	0.667873	0	1	0	1	1	0	0	1	0	1	1	0	0	0	0	0	0	0	0	0	0	0	0	0	0	0	0	0
Peak4914	2R	12041478	12041981	intron	0.683595	0	1	1	0	0	0	0	0	0	0	1	0	0	0	1	1	0	0	1	1	0	0	0	0	0	0	0	0
Peak4915	2R	12042061	12043772	intron	0.499544	0	1	1	0	0	0	0	0	0	0	0	0	0	0	0	0	0	1	0	0	0	0	0	0	0	0	0	0
Peak4917	2R	12047346	12048050	intron	0.667246	0	1	0	0	0	0	0	1	0	0	1	0	0	1	1	0	1	1	0	0	0	0	0	0	0	0	1	0
Peak4919	2R	12055094	12055516	CDS	0.604355	0	1	1	0	0	0	0	0	0	1	1	0	1	0	1	1	0	1	1	1	0	1	0	0	0	0	0	0
Peak4925	2R	12068539	12068837	promoter	0.475476	0	1	0	0	0	0	0	0	0	0	0	0	0	0	1	0	0	0	0	0	0	0	0	0	0	0	0	0
Peak4935	2R	12105786	12106161	intron	0.629805	0	1	0	0	0	0	0	0	0	0	0	0	0	0	0	0	0	0	0	0	0	0	0	0	0	0	0	0
Peak4940	2R	12166070	12166305	intergenic	0.477611	0	1	1	0	0	0	0	0	0	0	0	0	0	0	0	0	0	0	0	0	0	0	0	0	0	0	0	0
Peak4944	2R	12183046	12183813	CDS	0.589404	0	1	1	0	0	0	0	0	0	0	0	0	0	0	0	0	0	1	0	1	0	1	0	0	0	0	0	0
Peak4945	2R	12196288	12196858	promoter	1.0405	0	1	0	0	0	0	0	0	0	0	0	0	0	0	0	0	0	1	0	0	0	0	0	0	0	0	0	0
Peak4947	2R	12218644	12218985	intron	0.696183	0	1	1	0	0	0	0	0	0	0	1	0	0	0	1	1	0	0	1	1	0	0	0	0	0	0	0	0
Peak4954	2R	12273695	12274557	promoter	0.565183	0	1	1	0	0	0	0	0	0	0	0	0	0	0	0	0	0	0	0	0	0	0	0	0	0	0	0	0
Peak4956	2R	12390236	12390507	intron	0.817117	0	1	1	0	0	0	0	0	0	1	1	0	0	0	1	1	0	0	1	1	0	0	0	0	0	0	0	0
Peak4961	2R	12406512	12406877	intron	0.750456	0	1	1	0	0	0	0	0	0	0	0	0	1	0	0	0	0	1	0	0	0	1	0	0	1	0	1	0
Peak4962	2R	12418765	12419143	CDS	0.889119	0	1	0	0	0	0	0	0	0	0	0	0	0	0	0	0	0	0	0	0	0	0	0	0	0	0	0	0
Peak4971	2R	12527329	12528056	promoter	0.348732	0	1	1	0	0	0	0	0	0	0	0	0	1	0	1	0	0	1	0	0	0	1	0	0	0	0	0	0
Peak4972	2R	12531489	12531728	intron	1.1575	0	1	1	0	0	0	0	0	0	1	1	0	0	0	1	1	0	0	1	1	0	1	0	0	0	0	0	0
Peak4973	2R	12555353	12555597	intergenic	0.969295	0	1	1	0	0	1	0	0	0	0	0	0	0	0	0	1	0	0	0	1	0	0	0	0	0	1	1	0
Peak4974	2R	12557254	12557463	intergenic	0.866148	0	1	0	0	1	0	0	1	0	1	1	0	1	0	0	0	0	0	0	0	0	0	0	0	0	0	0	0
Peak4976	2R	12619513	12619782	intergenic	0.682409	0	1	0	0	0	0	0	0	0	0	0	0	0	0	0	0	0	1	0	0	0	0	0	0	0	0	1	0
Peak4985	2R	12726606	12726846	intergenic	1.3264	0	1	0	0	1	0	0	0	0	0	1	0	0	0	1	1	1	1	1	1	0	0	0	0	0	0	1	0
Peak4993	2R	12811931	12812559	promoter	0.717714	0	1	0	0	0	0	0	0	0	0	0	0	0	0	1	0	1	1	0	0	0	0	0	0	0	0	0	0
Peak4994	2R	12837802	12838083	CDS	0.5608	0	1	0	0	0	0	0	0	0	0	0	0	0	1	0	1	0	0	1	0	0	0	0	0	0	0	0	0
Peak4995	2R	12838269	12839167	CDS	0.532987	0	1	0	1	0	0	0	0	0	0	0	0	0	0	0	0	0	0	0	0	0	0	0	0	0	0	0	0
Peak5019	2R	13261344	13261843	CDS	0.450093	0	1	1	0	1	0	0	1	0	1	1	0	0	1	0	0	1	1	1	1	0	0	0	0	0	0	1	0
Peak5023	2R	13284391	13284589	intron	1.13801	0	1	1	0	0	1	0	0	0	0	0	0	0	0	1	1	1	1	0	0	0	0	0	0	0	0	0	0
Peak5025	2R	13290641	13291095	intron	0.796891	0	1	0	0	0	0	0	0	0	0	0	0	0	0	0	0	0	0	0	0	0	0	0	0	0	0	1	0
Peak5043	2R	13365467	13366864	promoter	0.819209	0	1	1	0	0	0	0	0	0	0	0	0	0	0	0	0	0	0	0	0	0	0	0	0	0	0	0	0
Peak5044	2R	13386225	13386658	intergenic	0.69018	0	1	1	0	0	0	0	0	0	0	1	0	0	0	1	1	0	1	1	1	0	1	0	0	0	0	0	0
Peak5045	2R	13389074	13389328	intergenic	0.706534	0	1	1	0	1	0	0	1	0	0	0	0	1	0	1	1	1	1	1	1	0	1	0	0	0	0	0	0
Peak5047	2R	13392041	13392707	intron	0.714992	0	1	0	0	0	1	1	0	0	0	0	0	1	1	1	0	1	1	0	1	0	0	1	0	0	1	1	0
Peak5080	2R	13554852	13555282	CDS	0.527293	0	1	0	0	0	1	1	0	0	0	0	0	1	0	1	0	1	1	0	0	0	1	0	0	1	1	1	0
Peak5081	2R	13555388	13556004	CDS	0.588669	0	1	0	0	0	0	0	0	0	0	0	0	0	0	0	0	0	0	0	0	0	0	0	0	0	0	0	0
Peak5087	2R	13567377	13568527	intron	0.617131	0	1	0	0	0	0	0	0	0	1	1	1	1	1	1	1	1	1	1	0	0	1	0	0	0	0	0	0
Peak5098	2R	13622022	13622265	UTR	0.690301	0	1	1	1	1	1	0	0	0	0	0	0	0	0	0	0	0	1	0	0	0	0	0	0	1	0	0	1
Peak5101	2R	13627717	13628081	CDS	0.774242	0	1	1	1	0	1	0	0	0	0	0	0	0	0	0	0	0	0	0	0	0	0	0	0	0	0	0	0
Peak5104	2R	13638603	13639104	CDS	0.731847	0	1	0	0	0	0	0	0	0	0	0	0	1	0	0	0	0	1	0	0	0	0	0	0	1	0	0	0
Peak5105	2R	13640634	13641552	CDS	0.529103	0	1	1	0	0	0	0	0	0	0	0	0	1	0	1	1	0	1	0	0	0	0	0	0	1	0	1	0
Peak5112	2R	13660437	13660784	intergenic	0.533072	0	1	1	1	1	1	0	0	0	0	0	0	0	0	0	0	0	0	0	0	0	0	0	0	0	0	0	0
Peak5116	2R	13682433	13683225	CDS	0.491817	0	1	0	0	0	0	0	0	0	0	0	0	0	0	0	0	0	0	0	0	0	0	0	0	0	0	0	0
Peak5124	2R	13700400	13700677	intron	1.00943	0	1	0	0	0	0	0	0	0	0	0	0	0	0	0	0	0	0	0	0	0	0	0	0	0	0	0	0
Peak5126	2R	13702830	13703976	intron	0.995581	0	1	0	0	0	0	0	0	0	0	0	0	0	0	0	0	0	0	0	0	0	0	0	0	0	0	0	0
Peak5128	2R	13706413	13706728	intron	0.635697	0	1	0	0	0	0	0	0	0	0	0	0	0	0	0	0	0	0	0	0	0	0	0	0	0	0	0	0
Peak5135	2R	13717796	13718199	intron	1.75604	0	1	0	0	0	0	0	0	0	0	0	0	0	0	0	0	0	0	0	0	0	0	0	0	0	0	0	0
Peak5141	2R	13726563	13727373	CDS	0.597487	0	1	0	0	0	0	0	0	0	0	0	0	0	0	0	0	0	0	0	0	0	0	0	0	0	0	0	0
Peak5156	2R	13780041	13781017	intron	0.837194	0	1	0	0	0	0	0	0	0	0	0	0	0	0	0	0	0	0	0	0	0	0	0	0	0	0	0	0
Peak5174	2R	14023991	14025227	CDS	0.977611	0	1	0	0	0	0	0	0	0	0	0	0	0	0	0	0	0	0	0	0	0	0	0	0	0	0	0	0
Peak5180	2R	14031356	14032063	CDS	0.447606	0	1	0	0	0	0	0	0	0	0	0	0	0	0	0	0	0	0	0	0	0	0	0	0	0	0	0	0
Peak5199	2R	14096864	14097237	intergenic	0.844468	0	1	0	0	0	0	0	0	0	0	0	0	0	0	0	0	0	0	0	0	0	0	0	0	0	0	0	0
Peak5200	2R	14098143	14099054	intergenic	0.877774	0	1	0	0	0	0	0	0	0	0	0	0	0	0	1	0	0	0	0	0	0	0	0	0	0	0	0	0
Peak5207	2R	14125678	14125977	intergenic	0.870088	0	1	0	0	0	0	0	0	0	0	0	0	0	0	0	0	0	0	0	0	0	0	0	0	0	0	0	0
Peak5208	2R	14127113	14127395	intergenic	0.600232	0	1	1	0	0	0	0	0	0	0	0	0	0	0	1	0	0	0	0	0	0	0	0	0	0	0	0	0
Peak5209	2R	14129524	14130050	intergenic	0.83495	0	1	0	0	0	0	0	0	0	0	0	0	0	0	0	0	0	0	0	0	0	0	0	0	0	0	0	0
Peak5211	2R	14142465	14142929	intergenic	0.946709	0	1	0	0	0	0	0	0	0	0	0	0	0	0	0	0	0	0	0	0	0	0	0	0	0	0	0	0
Peak5223	2R	14180490	14180957	intron	0.846658	0	1	0	0	0	0	0	0	0	0	0	0	0	0	0	0	0	0	0	0	0	0	0	0	0	0	0	0
Peak5224	2R	14186947	14188284	CDS	0.561843	0	1	0	0	0	0	0	0	0	0	0	0	0	0	0	0	0	0	0	0	0	0	0	0	0	0	0	0
Peak5227	2R	14191626	14192140	intron	0.837189	0	1	0	0	0	0	0	0	0	0	0	0	0	0	0	0	0	0	0	0	0	0	0	0	0	0	0	0
Peak5229	2R	14193027	14195508	intron	0.556079	0	1	0	0	0	0	0	0	0	1	0	0	1	0	1	1	1	1	0	0	0	1	0	0	0	0	0	0
Peak5233	2R	14198369	14198916	intron	0.732281	0	1	0	0	0	0	0	0	0	0	0	0	0	0	0	0	0	1	0	0	0	0	0	0	0	0	1	0
Peak5234	2R	14199290	14199848	promoter	0.412654	0	1	1	0	0	1	0	0	0	0	0	0	0	0	0	0	0	0	0	1	0	0	0	0	0	0	0	0
Peak5235	2R	14202927	14203322	intron	1.10531	0	1	0	0	0	0	0	0	0	0	0	0	0	0	0	0	0	0	0	0	0	0	0	0	0	0	0	0
Peak5238	2R	14207351	14207593	intron	0.830304	0	1	1	0	1	1	0	0	0	0	0	0	0	0	1	1	1	1	1	1	1	1	0	0	0	0	0	0
Peak5239	2R	14210381	14210731	intron	0.84292	0	1	1	0	0	0	0	0	0	0	0	0	0	0	0	0	0	0	0	0	0	0	0	0	0	0	0	0
Peak5242	2R	14227329	14228017	intron	1.57951	0	1	0	0	0	0	0	0	0	0	0	0	0	0	0	0	0	0	0	0	0	0	0	0	0	0	0	0
Peak5243	2R	14228389	14228996	intron	0.895759	0	1	0	0	0	0	0	0	0	0	0	0	0	0	0	1	0	0	0	1	0	0	0	0	0	0	0	0
Peak5244	2R	14229089	14229337	intron	1.02634	0	1	1	0	0	0	0	0	0	0	0	0	0	0	0	0	0	0	0	0	0	0	0	0	0	0	0	0
Peak5247	2R	14261540	14261801	intergenic	0.791791	0	1	1	0	0	0	0	0	0	0	0	0	0	0	1	1	0	1	0	1	0	0	0	0	0	0	0	0
Peak5248	2R	14264930	14265215	intergenic	1.21168	0	1	0	0	0	0	0	0	0	0	0	0	0	0	0	0	0	0	0	0	0	0	0	0	0	0	0	0
Peak5252	2R	14301385	14301634	intron	0.681942	0	1	0	0	0	0	0	0	0	0	0	0	0	0	0	0	0	0	0	0	0	0	0	0	0	0	0	0
Peak5254	2R	14323797	14324321	CDS	0.736166	0	1	1	0	0	0	0	0	0	0	0	0	1	0	0	0	0	1	0	0	0	1	0	0	1	0	1	0
Peak5255	2R	14324997	14325901	intron	0.608078	0	1	1	0	0	0	0	0	0	0	0	0	0	0	0	0	0	0	0	0	0	0	0	0	0	0	0	0
Peak5256	2R	14326368	14326811	intron	0.660963	0	1	0	0	0	0	0	0	0	0	0	0	0	0	0	0	0	0	0	0	0	0	0	0	0	0	0	0
Peak5262	2R	14419229	14420288	promoter	0.486251	0	1	0	0	0	0	0	0	0	0	0	0	0	0	0	0	0	0	0	0	0	0	0	0	0	0	0	0
Peak5263	2R	14424012	14424464	promoter	0.305013	0	1	1	0	0	0	0	0	0	0	0	0	0	0	0	0	0	0	0	0	0	0	0	0	0	0	0	0
Peak5265	2R	14449262	14449533	intron	0.54469	0	1	1	0	0	0	0	0	0	0	0	0	1	0	1	0	1	1	1	1	0	1	0	0	0	0	0	0
Peak5267	2R	14452241	14452479	intron	1.09272	0	1	0	1	0	1	0	0	0	0	0	0	0	0	0	0	0	0	0	0	0	0	0	0	0	0	0	0
Peak5268	2R	14456005	14456565	intron	0.426146	0	1	1	0	0	0	0	0	0	0	0	0	1	0	1	1	1	1	1	1	1	1	0	0	0	0	0	0
Peak5269	2R	14459411	14459839	intron	0.590181	0	1	0	0	0	0	0	0	0	0	0	0	0	0	0	0	0	1	0	0	0	0	0	0	0	0	0	0
Peak5276	2R	14522338	14522847	CDS	0.954456	0	1	0	0	0	0	0	0	0	0	0	0	0	0	0	0	0	0	0	0	0	0	0	0	0	0	0	0
Peak5277	2R	14523811	14524335	CDS	0.693317	0	1	0	0	0	0	0	0	0	0	0	0	1	0	0	0	0	1	0	0	0	0	0	0	0	0	0	0
Peak5281	2R	14527816	14528249	CDS	1.10955	0	1	0	0	0	1	0	0	0	0	0	0	0	0	1	1	1	1	1	0	1	1	0	0	0	0	0	0
Peak5282	2R	14532120	14532435	intron	1.22286	0	1	1	0	0	0	0	0	0	1	1	0	0	0	1	1	0	0	1	1	0	1	0	0	0	0	0	0
Peak5283	2R	14541487	14541787	intron	0.86089	0	1	1	0	0	1	0	0	0	1	1	0	1	0	1	1	1	1	1	1	0	1	0	0	0	0	0	0
Peak5285	2R	14553658	14554280	intergenic	0.531995	0	1	1	0	0	1	0	0	0	1	0	0	1	0	1	0	1	1	1	0	0	1	0	0	0	0	0	0
Peak5287	2R	14559629	14560185	intron	0.521267	0	1	1	1	0	1	0	0	0	1	1	1	1	0	1	1	1	1	0	1	0	1	0	1	0	1	0	0
Peak5290	2R	14562197	14562558	intergenic	0.732654	0	1	0	0	0	0	0	0	0	0	0	0	0	0	1	0	1	1	1	0	0	1	0	0	0	0	0	0
Peak5291	2R	14562780	14563268	intergenic	0.888935	0	1	1	0	0	1	1	0	0	1	0	1	1	0	1	0	1	1	1	0	1	1	0	0	1	1	1	0
Peak5295	2R	14604905	14605119	intergenic	0.891469	0	1	1	0	0	1	0	0	0	1	0	1	1	0	1	1	1	1	1	1	1	1	0	0	0	0	0	0
Peak5298	2R	14686982	14687677	intron	0.438485	0	1	0	0	0	0	0	0	0	0	0	0	0	0	0	0	0	0	0	0	0	0	0	0	0	0	0	0
Peak5308	2R	14834268	14834935	promoter	0.60901	0	1	1	0	0	0	0	0	0	1	0	0	1	0	1	1	0	1	1	1	0	1	0	0	0	0	0	0
Peak5311	2R	14864910	14865167	promoter	0.699159	0	1	0	0	0	0	0	0	0	0	0	0	0	0	0	0	1	1	0	0	0	0	0	0	0	0	0	0
Peak5315	2R	15026958	15027256	intron	1.15099	0	1	1	0	0	0	0	0	0	0	0	0	0	0	0	0	0	0	0	0	0	0	0	0	0	0	0	0
Peak5318	2R	15031284	15031791	intron	0.68969	0	1	0	0	0	0	0	0	0	0	0	0	0	0	1	1	1	1	0	0	0	0	0	0	0	0	0	0
Peak5326	2R	15048715	15049082	CDS	0.56285	0	1	1	0	0	0	0	0	0	0	0	0	0	0	0	0	0	0	0	0	0	0	0	0	0	0	0	0
Peak5332	2R	15136974	15137298	promoter	0.762483	0	1	1	0	0	0	0	0	0	0	0	0	0	0	1	1	0	0	0	1	0	0	0	0	0	0	0	0
Peak5334	2R	15143100	15143276	intergenic	1.07118	0	1	0	0	0	0	0	0	0	0	0	0	0	0	0	0	0	1	0	0	0	0	0	0	0	0	0	0
Peak5335	2R	15145380	15146442	intergenic	0.461342	0	1	0	1	1	1	0	0	0	1	1	1	1	0	1	1	1	1	1	0	1	1	0	0	0	0	0	0
Peak5336	2R	15149939	15150594	intergenic	0.658696	0	1	0	0	0	1	0	0	0	1	1	1	1	0	1	1	1	1	1	0	0	1	0	0	0	0	0	0
Peak5338	2R	15152551	15153148	intergenic	0.495512	0	1	0	0	0	0	0	0	0	0	0	0	0	0	0	0	0	0	0	0	0	0	0	0	0	0	0	0
Peak5339	2R	15153499	15153997	intergenic	0.959281	0	1	0	0	0	0	0	0	0	0	0	0	0	0	0	0	0	0	0	0	0	0	0	0	0	0	0	0
Peak5340	2R	15154437	15155282	intergenic	0.501645	0	1	0	0	0	0	0	0	0	0	0	0	0	0	1	0	0	1	0	0	0	0	0	0	0	0	0	0
Peak5342	2R	15159471	15159717	intron	1.27588	0	1	1	1	0	0	0	1	0	0	0	0	0	0	0	0	0	1	0	0	0	0	0	0	0	0	0	0
Peak5343	2R	15159780	15161243	intron	1.21511	0	1	1	0	0	0	0	0	0	0	0	0	0	0	0	0	0	0	0	0	0	0	0	0	0	0	0	0
Peak5345	2R	15164035	15164727	intron	0.61395	0	1	0	0	0	0	0	0	0	0	0	0	0	0	0	0	0	0	0	0	0	0	0	0	0	0	0	0
Peak5346	2R	15165170	15165771	CDS	0.812296	0	1	0	0	0	0	0	0	0	0	0	0	0	0	1	0	0	1	0	0	0	0	0	0	0	0	0	0
Peak5347	2R	15165887	15166016	CDS	0.959162	0	1	0	0	0	1	0	0	0	0	0	0	0	0	0	0	0	0	0	0	0	0	0	0	0	0	0	0
Peak5349	2R	15167375	15167748	CDS	1.01059	0	1	1	0	0	1	1	0	0	1	1	1	1	0	1	1	1	1	1	1	1	1	0	0	0	0	1	0
Peak5350	2R	15168946	15169410	CDS	1.03239	0	1	0	0	0	0	0	0	0	0	0	0	0	0	1	0	0	1	0	0	0	0	0	0	0	0	0	0
Peak5363	2R	15286189	15286707	CDS	0.882133	0	1	0	0	0	0	0	0	0	0	0	0	0	0	1	0	0	1	0	0	0	0	0	0	0	0	0	0
Peak5370	2R	15308240	15308560	intron	0.56515	0	1	1	0	0	0	0	0	0	0	0	0	0	0	0	0	0	1	0	0	0	1	0	0	0	0	0	0
Peak5378	2R	15334938	15336581	CDS	0.416359	0	1	0	1	0	0	0	1	0	0	0	0	0	0	0	0	0	1	0	0	0	0	0	0	0	0	0	0
Peak5390	2R	15380339	15380731	CDS	0.72796	0	1	0	0	0	0	0	0	0	0	0	0	0	0	1	1	0	0	1	0	0	0	0	0	0	0	0	0
Peak5396	2R	15457070	15457558	intron	0.674328	0	1	0	0	0	0	0	0	0	0	0	0	0	0	0	0	0	0	0	0	0	0	0	0	0	0	0	0
Peak5397	2R	15457673	15458024	intron	1.41616	0	1	0	0	0	0	0	0	0	0	0	0	0	0	0	0	0	0	0	0	0	0	0	0	0	0	0	0
Peak5404	2R	15545550	15550931	promoter	0.513087	0	1	0	0	1	0	0	0	0	0	0	0	1	0	0	0	0	1	0	0	0	1	0	0	1	0	1	0
Peak5411	2R	15574014	15574499	CDS	1.12503	0	1	1	0	1	0	1	0	0	0	0	0	1	0	0	0	0	1	0	0	0	1	0	0	1	0	1	0
Peak5412	2R	15576726	15576953	intergenic	1.02698	0	1	0	0	0	0	0	0	0	0	0	0	0	0	1	1	1	1	1	0	0	1	0	0	0	0	0	0
Peak5414	2R	15602996	15603345	intergenic	0.491344	0	1	0	0	0	0	0	0	0	0	0	0	0	0	0	0	0	0	0	0	0	0	0	0	0	0	0	0
Peak5420	2R	15616610	15617185	intergenic	0.381865	0	1	0	0	0	0	0	0	0	0	0	0	0	0	0	0	0	0	0	0	0	0	0	0	0	0	0	0
Peak5421	2R	15656026	15656338	intergenic	1.1493	0	1	1	0	0	0	0	0	0	1	1	0	1	0	1	1	0	1	1	1	0	1	0	0	0	0	0	0
Peak5424	2R	15697698	15698014	intergenic	0.913939	0	1	1	0	0	0	0	0	0	0	0	0	0	0	0	0	0	0	0	0	0	0	0	0	0	0	0	0
Peak5428	2R	15728077	15728694	intergenic	1.14407	0	1	1	0	0	0	0	0	0	0	0	0	0	0	0	0	0	0	0	0	0	0	0	0	0	0	0	0
Peak5429	2R	15742901	15743335	intergenic	0.492739	0	1	0	1	1	0	0	1	0	1	1	0	0	0	0	0	0	0	0	0	0	0	0	0	1	0	0	0
Peak5430	2R	15745312	15745861	intergenic	0.839706	0	1	1	0	0	0	0	0	0	0	0	0	0	0	1	0	0	1	1	0	0	1	0	0	0	0	0	0
Peak5431	2R	15758328	15758787	intergenic	1.2471	0	1	0	0	0	0	0	0	0	0	0	0	0	0	0	0	0	1	0	0	0	0	0	0	0	0	0	0
Peak5432	2R	15818037	15818428	intergenic	1.81834	0	1	1	1	1	1	0	0	0	0	0	0	0	0	0	1	0	0	0	0	0	0	1	0	0	1	0	0
Peak5433	2R	15822717	15823069	intergenic	1.25006	0	1	0	0	0	0	0	0	0	0	0	0	0	0	0	1	0	0	0	0	0	0	0	0	0	0	0	0
Peak5434	2R	15824900	15825354	intergenic	0.638641	0	1	0	0	0	0	0	0	0	0	0	0	0	0	0	0	0	0	0	0	0	0	0	0	0	0	0	0
Peak5435	2R	15828968	15829452	intergenic	0.688025	0	1	1	0	0	0	0	0	0	0	0	0	0	0	1	0	0	1	0	0	0	0	0	0	0	0	0	0
Peak5436	2R	15864886	15865288	intergenic	1.25993	0	1	0	0	0	0	0	1	0	0	0	0	0	0	0	1	0	1	0	0	0	0	0	0	0	0	0	0
Peak5439	2R	15887667	15888037	intergenic	0.571909	0	1	1	0	0	0	0	0	0	0	0	0	1	0	0	0	0	1	0	0	0	1	0	0	1	0	1	0
Peak5442	2R	15919661	15920359	intergenic	0.52558	0	1	1	0	1	0	0	0	0	0	0	0	1	0	0	0	0	1	0	0	0	1	0	0	1	0	1	0
Peak5443	2R	15922770	15923401	intergenic	1.15354	0	1	0	0	0	1	0	0	0	0	0	1	1	0	1	0	1	1	0	0	1	1	0	1	0	1	0	0
Peak5444	2R	15924739	15925098	intergenic	0.832155	0	1	1	0	0	0	0	0	0	0	0	0	0	0	1	1	1	1	0	0	0	1	0	0	0	0	0	0
Peak5445	2R	15928467	15929213	intergenic	0.671155	0	1	0	0	0	0	0	0	0	1	0	0	1	0	1	1	1	1	1	0	0	1	0	0	0	0	0	0
Peak5446	2R	15936839	15937411	intergenic	1.02527	0	1	1	0	0	0	0	0	0	0	0	0	0	0	0	0	0	0	0	0	0	0	0	0	0	0	0	0
Peak5447	2R	15937740	15938433	intergenic	0.827064	0	1	1	1	0	1	0	0	0	1	0	0	0	0	0	0	0	0	0	0	0	0	0	0	0	0	0	0
Peak5448	2R	15939099	15940052	intergenic	0.597147	0	1	0	0	0	0	0	0	0	0	0	0	0	0	0	0	0	0	0	0	0	0	0	0	0	0	0	0
Peak5449	2R	15943847	15944637	intergenic	0.864153	0	1	0	0	0	0	0	0	0	0	0	0	0	0	1	1	1	0	0	0	0	0	0	0	0	0	0	0
Peak5450	2R	15947143	15947474	intergenic	0.718653	0	1	1	0	0	0	0	0	0	0	0	0	0	0	0	0	0	0	0	0	0	0	0	0	0	0	0	0
Peak5451	2R	15951943	15952534	intergenic	0.526652	0	1	1	1	1	0	0	0	0	0	0	0	0	0	0	0	0	0	0	0	0	0	0	0	0	0	0	0
Peak5452	2R	15952976	15953442	intergenic	0.56273	0	1	0	0	0	0	0	0	0	0	0	0	0	0	0	0	0	0	0	0	0	0	0	0	0	0	0	0
Peak5453	2R	15953838	15954693	intergenic	0.492219	0	1	0	0	0	0	0	0	0	1	0	0	0	0	1	1	1	1	1	1	0	1	0	0	0	0	0	0
Peak5454	2R	15959456	15960532	intergenic	0.476638	0	1	0	0	0	0	0	0	0	0	0	0	0	0	0	0	0	0	0	0	0	0	0	0	0	0	0	0
Peak5455	2R	15968705	15969300	intergenic	1.31336	0	1	1	1	1	0	0	1	0	1	1	0	1	0	0	0	0	0	0	0	0	0	0	0	0	0	0	0
Peak5456	2R	15979385	15979736	intergenic	0.914665	0	1	0	0	1	0	0	0	0	0	0	0	0	0	1	1	0	0	0	1	0	0	0	0	0	0	0	0
Peak5457	2R	15991620	15991822	intergenic	1.90109	0	1	0	0	0	0	0	0	0	0	0	0	0	0	1	0	0	1	0	0	0	0	0	0	0	0	0	0
Peak5462	2R	16001408	16003789	CDS	0.583474	0	1	1	0	0	0	0	0	0	0	0	0	0	0	0	0	0	1	0	0	0	0	0	0	0	0	0	0
Peak5464	2R	16006895	16007599	intergenic	0.677942	0	1	0	0	0	0	0	0	0	0	0	0	0	0	0	0	0	0	0	0	0	0	0	0	0	0	0	0
Peak5466	2R	16049687	16050112	intergenic	0.671318	0	1	0	0	0	0	0	1	0	0	0	0	0	1	1	0	0	1	0	0	0	0	0	0	0	0	1	0
Peak5467	2R	16054107	16054311	intergenic	1.04542	0	1	0	0	0	0	0	0	0	0	0	0	0	0	1	0	0	0	0	0	0	0	0	0	0	0	0	0
Peak5469	2R	16056679	16056878	intergenic	1.29176	0	1	0	0	0	0	0	0	0	0	0	0	0	0	0	0	0	0	0	0	0	0	0	0	0	0	0	0
Peak5472	2R	16130439	16130697	CDS	1.03415	0	1	1	0	0	0	0	0	0	0	0	0	0	0	0	0	0	0	0	0	0	0	0	0	0	0	0	0
Peak5473	2R	16131725	16132166	CDS	1.12587	0	1	1	0	0	1	0	0	0	0	0	0	0	0	0	0	0	0	0	1	0	0	0	0	0	0	0	0
Peak5476	2R	16149012	16150549	promoter	0.317274	0	1	0	0	0	0	0	0	0	0	0	0	0	0	0	0	0	0	0	0	0	0	0	0	0	0	0	0
Peak5483	2R	16207971	16208193	promoter	0.742609	0	1	0	0	0	0	0	0	0	0	0	0	0	0	0	0	0	1	0	0	0	0	0	0	0	0	0	0
Peak5486	2R	16214629	16216674	promoter	0.439505	0	1	0	0	0	0	0	0	0	0	0	0	0	0	0	0	0	0	0	0	0	0	0	0	0	0	0	0
Peak5488	2R	16358556	16358759	intron	1.33696	0	1	0	0	0	0	0	0	0	0	0	0	0	0	0	1	0	1	0	0	0	0	0	0	0	0	0	0
Peak5489	2R	16425891	16427343	promoter	0.487466	0	1	0	0	0	0	0	0	0	0	0	0	0	0	0	0	0	1	0	0	0	0	0	0	0	0	0	0
Peak5493	2R	16447803	16448170	intergenic	0.643952	0	1	1	0	0	0	0	0	0	0	0	0	0	0	0	0	0	0	0	1	0	0	0	0	0	0	0	0
Peak5502	2R	16484253	16485855	intron	0.947157	0	1	0	0	0	0	0	1	0	0	0	0	0	0	1	0	1	1	0	0	0	0	0	0	0	0	0	0
Peak5504	2R	16486370	16487309	intron	0.707617	0	1	1	0	0	0	0	0	0	0	0	0	0	0	1	1	0	0	0	0	0	0	0	0	0	0	0	0
Peak5513	2R	16518401	16518887	intron	0.831321	0	1	0	0	0	0	0	0	0	0	0	0	0	0	1	0	0	1	0	0	0	0	0	0	0	0	0	0
Peak5524	2R	16585793	16586097	promoter	0.677279	0	1	0	0	0	0	0	0	0	0	0	0	0	0	0	0	0	0	0	0	0	0	0	0	0	0	0	0
Peak5529	2R	16725285	16726547	intergenic	0.583526	0	1	0	0	0	0	0	0	0	0	0	0	0	0	0	0	0	0	0	0	0	0	0	0	0	0	0	0
Peak5530	2R	16733534	16734004	intergenic	0.482068	0	1	0	0	0	0	0	0	0	1	0	0	0	0	0	0	0	0	0	0	0	0	0	0	0	0	0	0
Peak5531	2R	16746275	16747520	intergenic	1.25038	0	1	0	0	0	0	0	0	0	0	0	0	0	0	1	0	0	1	0	0	0	0	0	0	0	0	0	0
Peak5532	2R	16757706	16757952	promoter	0.548562	0	1	0	0	0	0	0	0	0	0	0	0	0	0	0	0	0	1	0	0	0	0	0	0	0	0	0	0
Peak5536	2R	16785090	16785535	promoter	1.20176	0	1	0	0	0	0	0	0	0	0	0	0	0	0	0	0	0	0	0	0	0	0	0	0	0	0	0	0
Peak5537	2R	16790988	16791361	intergenic	0.455854	0	1	0	0	0	0	0	0	0	0	0	0	0	0	1	0	0	1	0	0	0	0	0	0	0	0	0	0
Peak5539	2R	16794483	16795576	intergenic	0.544322	0	1	0	0	0	0	0	0	0	0	0	0	0	0	1	0	0	0	0	0	0	0	0	0	0	0	0	0
Peak5540	2R	16798676	16798969	intergenic	0.889913	0	1	0	0	0	0	0	0	0	0	0	0	0	0	0	0	0	0	0	0	0	0	0	0	0	0	0	0
Peak5543	2R	16803996	16804441	promoter	0.386838	0	1	0	0	0	0	0	0	0	0	0	0	0	0	0	0	0	0	0	0	0	0	0	0	0	0	0	0
Peak5546	2R	16836507	16836891	intergenic	0.78348	0	1	0	0	0	0	0	0	0	0	0	0	0	0	0	0	0	0	0	0	0	0	0	0	0	0	0	0
Peak5550	2R	16846736	16847339	intron	0.566701	0	1	0	1	0	1	0	0	0	0	0	0	0	0	0	0	0	0	0	0	0	0	0	0	0	0	0	0
Peak5553	2R	16849542	16850319	intergenic	0.989654	0	1	1	0	0	0	0	0	0	0	0	0	0	1	1	0	0	1	0	1	0	0	0	0	0	0	1	0
Peak5555	2R	16853019	16853302	intergenic	1.34043	0	1	0	0	1	0	0	0	0	0	0	0	0	0	0	0	0	0	0	0	0	0	0	0	0	0	1	0
Peak5557	2R	16879179	16879663	intergenic	0.388617	0	1	1	0	1	1	0	0	0	1	1	1	1	0	1	1	1	1	1	1	1	1	0	0	0	0	0	0
Peak5566	2R	16924439	16924772	intergenic	1.15775	0	1	1	0	0	0	0	0	0	0	0	0	0	0	0	0	0	0	0	0	0	0	0	0	0	0	0	0
Peak5568	2R	16928981	16929537	intergenic	0.741954	0	1	0	1	0	1	0	0	0	1	0	1	0	1	1	1	1	1	0	0	0	0	0	0	0	0	0	0
Peak5586	2R	17028081	17028603	intron	0.433282	0	1	1	0	0	0	0	0	0	0	0	0	0	0	1	1	1	1	0	0	0	0	0	0	0	0	0	0
Peak5592	2R	17036978	17037263	CDS	0.760542	0	1	0	0	0	0	0	0	0	0	0	0	0	0	1	0	0	1	0	0	0	0	0	0	0	0	0	0
Peak5593	2R	17044642	17045023	intron	1.43254	0	1	0	0	0	0	0	0	0	0	0	0	0	0	1	1	0	1	0	0	0	0	0	0	0	0	0	0
Peak5600	2R	17061042	17061360	CDS	0.552056	0	1	1	0	0	0	0	0	0	0	0	0	0	0	0	1	0	0	1	1	0	1	0	0	0	0	0	0
Peak5606	2R	17080323	17081472	promoter	0.562333	0	1	1	0	0	0	0	0	0	1	1	0	1	0	1	1	0	1	1	1	0	1	0	0	0	0	0	0
Peak5610	2R	17089329	17089908	intron	0.765672	0	1	1	0	0	0	0	0	0	1	1	0	1	0	1	1	0	1	1	1	0	1	0	0	0	0	0	0
Peak5615	2R	17108631	17109334	CDS	0.478909	0	1	1	0	0	0	0	0	0	0	0	0	1	0	1	1	0	1	1	1	0	1	0	0	0	0	0	0
Peak5629	2R	17132594	17132991	intron	0.886415	0	1	0	0	0	0	0	0	0	0	0	0	0	0	0	0	0	1	0	0	0	0	0	0	1	0	1	0
Peak5630	2R	17134295	17134742	intron	0.631486	0	1	0	0	0	0	0	0	0	0	0	0	0	0	0	0	0	1	0	0	0	0	0	0	0	0	0	0
Peak5632	2R	17136262	17136858	intron	0.555512	0	1	0	0	0	0	0	0	0	0	0	0	0	0	1	0	0	0	0	0	0	0	0	0	0	0	0	0
Peak5638	2R	17170129	17171069	promoter	0.572336	0	1	0	0	0	0	0	0	0	0	0	0	0	0	1	1	1	1	1	0	0	0	0	0	0	0	0	0
Peak5641	2R	17181076	17181467	promoter	0.376557	0	1	0	0	0	0	0	0	0	0	0	0	0	0	1	0	0	1	0	0	0	0	0	0	0	0	0	0
Peak5653	2R	17225138	17225258	CDS	0.723198	0	1	1	0	0	0	0	0	0	0	0	0	0	0	0	0	0	1	0	0	0	1	0	0	0	0	0	0
Peak5654	2R	17225464	17225808	CDS	0.731744	0	1	0	0	0	0	0	0	0	0	0	0	0	0	1	0	0	0	0	0	0	0	0	0	0	0	0	0
Peak5655	2R	17227272	17228692	CDS	0.612914	0	1	1	0	0	0	0	0	0	0	1	0	0	0	1	1	1	1	1	1	0	1	0	0	0	0	0	0
Peak5658	2R	17245314	17245786	CDS	0.587814	0	1	0	0	0	0	0	0	0	1	0	0	0	0	1	0	0	0	0	0	0	0	0	0	0	0	0	0
Peak5659	2R	17246710	17247746	intron	0.641437	0	1	0	0	0	0	0	0	0	0	0	0	0	0	1	0	0	0	0	0	0	0	0	0	0	0	0	0
Peak5664	2R	17256306	17257197	intron	0.407921	0	1	0	0	0	0	0	1	0	0	0	0	0	0	1	1	0	1	0	0	0	0	0	0	0	0	0	0
Peak5665	2R	17257454	17257944	intron	0.31717	0	1	0	0	0	0	0	1	0	0	0	0	0	1	1	0	0	1	0	0	0	0	0	0	0	0	0	0
Peak5679	2R	17313341	17314293	intron	0.64511	0	1	0	0	0	0	0	0	0	0	0	0	0	0	0	0	0	0	0	0	0	0	0	0	0	0	0	0
Peak5682	2R	17316078	17316496	intron	0.533087	0	1	0	0	0	0	0	1	0	0	0	0	1	1	0	1	1	1	0	0	0	0	0	0	0	0	0	0
Peak5685	2R	17320594	17321121	intron	0.684373	0	1	0	0	0	0	0	0	0	0	0	0	0	0	0	0	0	0	0	0	0	0	0	0	0	0	0	0
Peak5688	2R	17332190	17332697	intron	0.501244	0	1	0	0	0	0	0	1	0	0	1	0	0	0	1	0	1	1	1	0	0	1	0	0	0	0	1	0
Peak5694	2R	17340826	17341372	intron	0.378541	0	1	0	0	0	0	0	0	0	0	0	0	0	0	0	0	0	0	0	0	0	0	0	0	0	0	0	0
Peak5695	2R	17341831	17343156	intron	0.526683	0	1	0	0	0	0	0	0	0	0	0	0	0	0	0	0	0	0	0	0	0	0	0	0	0	0	0	0
Peak5701	2R	17347178	17347451	intron	0.743246	0	1	0	0	0	0	0	1	0	0	0	0	0	0	0	0	1	1	0	0	0	0	0	0	0	0	1	0
Peak5703	2R	17348758	17349159	intron	0.844926	0	1	0	0	0	0	0	0	0	0	0	0	0	0	0	0	0	1	0	0	0	1	0	0	1	0	1	0
Peak5717	2R	17362135	17363160	intron	0.429614	0	1	1	1	0	0	0	0	0	0	0	0	0	0	0	0	0	0	0	1	0	0	0	0	0	0	0	0
Peak5718	2R	17363261	17364611	intron	0.48288	0	1	0	0	0	0	1	0	0	0	0	0	1	1	1	0	1	1	0	0	0	1	0	0	1	0	1	0
Peak5719	2R	17364736	17365898	intron	0.316962	0	1	0	0	0	1	0	0	0	0	0	0	0	0	0	0	0	1	0	0	0	0	0	0	1	0	1	0
Peak5724	2R	17368964	17369522	promoter	0.652809	0	1	0	0	0	0	0	0	0	0	0	0	0	0	0	0	0	0	0	0	0	0	0	0	0	0	0	0
Peak5728	2R	17389460	17390363	promoter	0.484822	0	1	0	0	0	0	0	0	0	0	0	0	0	0	0	0	0	0	0	0	0	0	0	0	0	0	0	0
Peak5733	2R	17411815	17412323	intron	0.342821	0	1	1	0	0	0	0	0	0	0	0	0	0	0	0	0	0	1	0	0	0	1	0	0	0	0	0	0
Peak5734	2R	17412406	17413173	intron	1.1008	0	1	0	0	0	0	0	0	0	0	0	0	0	0	1	0	0	1	0	0	0	0	0	0	0	0	0	0
Peak5735	2R	17416192	17416849	intron	0.748493	0	1	0	0	0	0	0	0	0	0	0	0	0	1	0	0	0	0	0	0	0	0	0	0	0	0	0	0
Peak5737	2R	17421971	17422745	intron	0.404294	0	1	0	0	0	0	0	0	0	0	0	0	0	0	0	0	0	1	0	0	0	0	0	0	0	0	0	0
Peak5738	2R	17422847	17424108	CDS	0.283488	0	1	0	0	0	0	0	0	0	0	0	0	0	0	0	0	0	0	0	0	0	0	0	0	0	0	0	0
Peak5743	2R	17428589	17428909	intron	0.623492	0	1	0	1	0	0	0	0	0	0	0	0	0	0	1	0	0	1	0	0	0	1	0	0	0	0	0	0
Peak5760	2R	17458758	17459204	promoter	0.547335	0	1	1	0	0	0	0	0	0	0	0	0	0	0	1	0	0	0	1	0	0	1	0	0	0	0	0	0
Peak5762	2R	17465325	17465613	intergenic	0.749807	0	1	1	0	0	0	0	0	0	0	0	0	0	0	0	0	0	0	1	1	0	0	0	0	0	0	0	0
Peak5763	2R	17467222	17467590	intergenic	0.832752	0	1	0	0	0	1	0	0	0	0	0	0	0	0	1	0	1	1	0	0	0	0	0	0	0	0	0	0
Peak5764	2R	17473011	17473494	intergenic	0.51408	0	1	1	0	0	0	0	0	0	0	0	0	0	0	0	0	0	0	0	0	0	0	0	0	0	0	0	0
Peak5775	2R	17545448	17545709	promoter	0.421764	0	1	1	1	1	1	0	0	0	1	1	0	0	0	1	1	1	1	1	1	1	1	0	0	1	0	1	0
Peak5799	2R	17599351	17600219	intergenic	0.440624	0	1	1	0	1	1	0	0	0	1	1	0	0	0	1	1	0	0	0	1	0	0	0	0	1	1	1	0
Peak5803	2R	17604418	17605288	CDS	0.424892	0	1	0	1	0	0	0	1	0	0	0	0	0	0	0	0	0	0	0	0	0	0	0	0	0	0	0	0
Peak5811	2R	17730544	17730864	intergenic	0.417107	0	0	1	0	0	0	0	0	0	0	0	0	0	0	0	0	0	0	0	0	0	0	0	0	0	0	0	0
Peak5812	2R	17734440	17734650	intergenic	0.785814	0	0	1	0	0	0	0	0	0	0	0	0	0	0	0	0	0	0	1	1	0	1	0	0	0	0	0	0
Peak5817	2R	17771841	17772190	intron	0.973508	0	0	1	0	0	0	0	0	0	0	0	0	0	0	0	0	0	0	0	1	0	0	0	0	0	0	0	0
Peak5818	2R	17787724	17787931	intron	0.864581	0	0	1	0	0	0	0	0	0	0	0	0	0	0	0	0	0	0	0	0	0	0	0	0	0	0	0	0
Peak5826	2R	18024323	18024577	promoter	0.795095	0	0	1	0	0	0	0	0	0	0	0	0	0	0	0	0	0	0	0	0	0	0	0	0	0	0	0	0
Peak5830	2R	18066836	18067330	promoter	1.07791	0	0	1	0	0	0	0	0	0	0	0	0	0	0	0	0	0	0	0	0	0	0	0	0	0	0	0	0
Peak5838	2R	18101592	18102022	intron	0.638324	0	0	1	0	0	0	0	0	0	0	0	0	0	0	0	0	0	0	0	0	0	0	0	0	0	0	0	0
Peak5840	2R	18125797	18126234	intergenic	0.681138	0	0	1	0	0	0	0	0	0	0	0	0	0	0	0	0	0	0	1	1	0	1	0	0	0	0	0	0
Peak5841	2R	18129452	18129915	intergenic	0.662096	0	0	1	0	0	0	0	0	0	0	0	0	1	0	0	0	0	0	0	0	0	0	0	0	0	0	0	0
Peak5844	2R	18137904	18138370	intron	0.890851	0	0	1	0	0	1	0	0	0	0	0	0	0	0	0	0	1	0	0	0	0	0	0	0	0	0	0	0
Peak5845	2R	18143785	18144262	intron	1.38264	0	0	1	0	0	0	0	0	0	0	0	0	0	0	0	0	0	0	0	0	0	0	0	0	0	0	0	0
Peak5846	2R	18153989	18154280	intron	0.690714	0	0	1	0	0	0	0	0	0	0	0	0	0	0	0	0	0	0	0	0	0	0	0	0	0	0	0	0
Peak5869	2R	18278817	18279047	CDS	0.767967	0	0	1	0	0	0	0	0	0	0	0	0	0	1	0	0	0	0	0	1	0	0	0	0	0	0	0	0
Peak5871	2R	18284687	18285681	intron	0.445403	0	0	1	0	0	0	0	0	0	0	0	0	0	0	0	0	0	0	0	0	0	0	0	0	0	0	0	0
Peak5872	2R	18287275	18287688	intron	0.644354	0	0	1	0	0	0	0	0	0	0	0	0	0	0	0	0	0	0	0	0	0	0	0	0	0	0	0	0
Peak5873	2R	18288251	18288530	intron	1.37405	0	0	1	0	0	0	0	0	0	0	0	0	0	0	0	0	0	0	0	0	0	0	0	0	0	0	0	0
Peak5887	2R	18380975	18381264	CDS	0.685647	0	0	1	0	0	0	0	0	0	0	0	0	0	0	0	0	0	0	0	0	0	0	0	0	0	0	0	0
Peak5888	2R	18393035	18394193	intron	0.507774	0	0	1	0	0	0	0	0	0	0	1	0	0	0	0	0	0	0	0	1	0	0	0	0	0	0	0	0
Peak5889	2R	18394447	18395661	intron	0.843855	0	0	1	0	1	0	0	0	0	1	1	0	0	1	0	0	0	0	1	1	0	0	0	0	0	0	1	0
Peak5890	2R	18395791	18396024	intron	0.5318	0	0	1	0	0	0	0	0	0	0	0	0	0	0	0	0	0	0	0	0	0	0	0	0	0	0	0	0
Peak5891	2R	18396499	18396789	intron	0.755331	0	0	1	0	0	0	0	0	0	0	0	0	0	0	0	0	0	0	0	0	0	0	0	0	0	0	0	0
Peak5892	2R	18398011	18398264	intron	0.50567	0	0	1	1	1	1	0	0	0	0	0	0	0	0	0	0	0	0	0	0	0	0	0	0	1	0	1	0
Peak5894	2R	18401228	18404420	promoter	0.356261	0	0	1	1	0	0	0	0	0	0	0	0	0	0	0	0	0	0	0	0	0	0	0	0	0	0	0	0
Peak5895	2R	18404859	18405698	intron	0.471993	0	0	1	0	0	0	0	0	0	0	0	0	0	0	0	0	0	0	0	0	0	0	0	0	0	0	0	0
Peak5896	2R	18407828	18408221	intron	0.746424	0	0	1	0	0	0	0	0	0	0	0	0	0	0	0	0	0	0	0	0	0	0	0	0	0	0	0	0
Peak5898	2R	18433959	18434403	promoter	0.558685	0	0	1	0	0	0	0	0	0	0	0	0	0	0	0	0	0	0	0	1	0	0	0	0	0	0	0	0
Peak5899	2R	18448164	18448557	UTR	0.884483	0	0	1	0	0	0	0	0	0	0	0	0	0	0	0	0	0	0	0	0	0	0	0	0	0	0	0	0
Peak5917	2R	18532236	18532508	UTR	1.19718	0	0	1	0	0	0	0	0	0	0	0	0	0	0	0	0	0	1	0	0	0	0	0	0	0	0	0	0
Peak5919	2R	18535766	18536092	promoter	0.599201	0	0	1	0	0	0	0	0	0	0	0	0	0	0	0	0	0	0	0	0	0	0	0	0	0	0	0	0
Peak5921	2R	18565918	18566261	intergenic	0.992956	0	0	1	0	0	0	0	0	0	0	0	0	0	0	0	0	0	0	0	0	0	0	0	0	0	0	0	0
Peak5922	2R	18569181	18570120	intergenic	0.485103	0	0	1	0	0	0	0	0	0	0	0	0	0	0	0	0	0	0	0	1	0	0	0	0	0	0	0	0
Peak5927	2R	18578950	18580049	UTR	0.47126	0	0	1	0	0	0	0	0	0	0	0	0	0	0	0	0	0	0	0	0	0	0	0	0	0	0	0	0
Peak5928	2R	18585084	18585450	CDS	0.944854	0	0	1	0	0	0	0	0	0	0	0	0	0	0	0	0	0	0	1	0	0	0	0	0	0	0	0	0
Peak5936	2R	18634714	18635271	CDS	1.04212	0	0	1	0	0	0	0	0	0	0	0	0	0	0	0	0	0	0	0	0	0	0	0	0	0	0	0	0
Peak5961	2R	18932378	18932989	intergenic	0.774357	0	0	1	0	0	0	0	0	0	0	0	0	0	0	0	0	0	0	0	0	0	0	0	0	0	0	0	0
Peak5962	2R	18933391	18935720	promoter	0.518894	0	0	1	0	0	0	0	0	0	0	0	0	0	0	0	0	0	0	0	1	0	0	0	0	0	0	0	0
Peak5963	2R	18935912	18936293	intergenic	0.730631	0	0	1	0	0	0	0	0	0	0	0	0	0	1	1	0	0	1	0	1	0	0	1	0	0	0	1	0
Peak5964	2R	18937013	18937901	intergenic	0.403831	0	0	1	0	0	0	0	0	0	0	0	0	0	0	0	0	0	0	0	0	0	0	0	0	0	0	0	0
Peak5969	2R	18964906	18965712	CDS	0.538609	0	0	1	0	0	0	0	0	0	0	0	0	0	0	0	0	0	0	0	0	0	0	0	0	0	0	0	0
Peak5972	2R	18971056	18971307	intergenic	0.701354	0	0	1	0	0	0	0	0	0	0	0	0	0	0	0	0	0	0	0	1	0	0	0	0	0	0	1	0
Peak5973	2R	18977500	18977866	UTR	0.682548	0	0	1	0	1	0	0	0	0	1	1	0	0	0	1	1	0	0	1	1	0	0	0	0	0	0	1	0
Peak5976	2R	19059467	19059801	intron	0.793693	0	0	1	0	0	1	0	0	0	0	1	0	1	0	0	0	0	0	1	1	0	1	0	0	0	0	0	0
Peak5979	2R	19077735	19078110	intron	0.633129	0	0	1	0	0	1	0	0	0	0	0	0	0	0	0	0	0	0	0	0	0	0	0	0	0	0	0	0
Peak5985	2R	19094192	19095015	intergenic	0.927402	0	0	1	0	0	0	0	0	0	0	0	0	0	0	0	0	0	0	0	1	0	0	0	0	0	0	0	0
Peak5986	2R	19104807	19105535	intergenic	0.796921	0	0	1	0	0	0	0	0	0	0	0	0	0	1	1	0	0	0	0	1	0	0	1	0	0	0	0	0
Peak5988	2R	19235046	19235281	promoter	1.12727	0	0	1	0	0	0	0	0	0	0	0	0	0	0	0	0	0	0	1	1	0	0	0	0	0	0	0	0
Peak5998	2R	19313459	19313821	promoter	0.710906	0	0	1	0	0	0	0	0	0	0	0	0	0	0	0	0	0	0	1	1	0	1	0	0	0	0	0	0
Peak6001	2R	19413562	19415323	CDS	0.53192	0	0	1	0	0	0	0	0	0	1	1	0	0	0	1	1	0	0	1	1	0	0	0	0	0	0	0	0
Peak6002	2R	19430498	19431122	CDS	1.18199	0	0	1	0	0	0	0	0	0	0	0	0	0	0	0	0	0	0	0	0	0	0	0	0	0	0	0	0
Peak6022	2R	19467349	19469202	promoter	0.373876	0	0	1	1	0	1	0	1	0	0	0	0	0	1	1	0	1	1	0	1	0	0	1	0	0	0	1	0
Peak6025	2R	19473679	19475442	intron	0.685956	0	0	1	0	0	0	0	0	0	0	0	0	0	0	0	0	0	0	0	0	0	0	0	0	0	0	0	0
Peak6036	2R	19521678	19521923	intron	0.955992	0	0	1	0	0	0	0	0	0	0	0	0	0	1	0	0	0	0	1	1	0	0	0	0	0	0	0	0
Peak6039	2R	19526108	19527271	intron	0.408747	0	0	1	1	0	1	0	0	0	1	0	0	0	0	1	0	0	0	0	0	0	0	0	0	0	0	0	0
Peak6042	2R	19528587	19529148	intron	0.639014	0	0	1	0	0	0	0	0	0	1	1	0	1	0	0	0	0	0	1	1	0	1	0	0	0	0	0	0
Peak6043	2R	19531001	19532222	intron	0.760936	0	0	1	0	0	0	0	0	0	0	0	0	0	0	0	0	0	0	0	0	0	0	0	0	0	0	0	0
Peak6044	2R	19532702	19534900	promoter	0.901648	0	0	1	0	0	0	0	0	0	0	0	0	0	0	0	0	0	0	0	0	0	0	0	0	0	0	0	0
Peak6049	2R	19537890	19538296	intron	0.726058	0	0	1	0	1	0	0	0	0	1	1	0	1	0	1	1	0	0	1	1	0	1	0	0	0	0	0	0
Peak6050	2R	19538352	19541844	CDS	0.731602	0	0	1	0	0	0	0	0	0	1	1	0	1	1	0	0	0	0	1	1	0	1	0	0	0	0	0	0
Peak6051	2R	19542135	19543208	UTR	0.9445	0	0	1	0	0	0	0	0	0	0	0	0	0	0	0	0	0	0	0	0	0	0	0	0	0	0	0	0
Peak6052	2R	19543271	19543613	intergenic	1.04655	0	0	1	0	0	0	0	0	0	0	0	0	0	0	0	0	0	0	0	0	0	0	0	0	0	0	0	0
Peak6056	2R	19555952	19556239	intron	1.32993	0	0	1	0	0	0	0	0	0	0	1	0	0	0	0	0	0	0	0	1	0	0	0	0	0	0	0	0
Peak6060	2R	19589587	19590352	promoter	0.298118	0	0	1	0	0	0	0	0	0	0	0	0	0	0	0	0	0	0	0	0	0	0	0	0	0	0	0	0
Peak6064	2R	19633339	19633655	intron	0.545641	0	0	1	0	0	0	0	0	0	0	0	0	0	0	0	0	0	0	0	0	0	0	0	0	0	0	0	0
Peak6069	2R	19729497	19729757	CDS	1.5211	0	0	1	0	0	0	0	0	0	0	0	0	0	0	0	0	0	0	0	0	0	0	0	0	0	0	0	0
Peak6071	2R	19733983	19734304	CDS	0.844153	0	0	1	0	0	0	0	0	0	0	0	0	0	0	0	0	0	0	0	1	0	0	0	0	0	0	0	0
Peak6077	2R	19749547	19750443	promoter	0.377944	0	0	1	0	0	0	0	0	0	0	0	0	0	0	0	0	0	0	0	0	0	0	0	0	0	0	0	0
Peak6080	2R	19756331	19756673	intergenic	1.58023	0	0	1	0	0	0	0	0	0	0	0	0	0	0	0	0	0	0	0	0	0	0	0	0	0	0	0	0
Peak6081	2R	19756730	19756965	intergenic	1.83326	0	0	1	0	0	0	0	0	1	0	0	0	0	0	0	0	0	0	1	1	0	0	0	0	0	0	0	0
Peak6089	2R	19811900	19812456	CDS	0.821961	0	0	1	0	0	1	0	0	0	0	0	0	0	0	1	0	0	0	1	1	0	0	0	0	0	0	0	0
Peak6101	2R	19864251	19864498	CDS	0.392359	0	0	1	1	1	0	0	0	0	1	1	0	1	0	1	1	0	1	1	1	0	1	0	0	0	0	0	0
Peak6146	2R	20077926	20078945	CDS	0.793388	0	0	1	0	0	0	0	0	0	0	0	0	0	0	0	0	0	0	0	0	0	0	0	0	0	0	0	0
Peak6150	2R	20164512	20164971	intron	0.745241	0	0	1	0	0	0	0	0	0	0	0	0	0	0	0	0	0	0	0	0	0	0	0	0	0	0	0	0
Peak6157	2R	20238235	20238875	CDS	0.851339	0	0	1	0	0	0	0	0	0	0	0	0	0	0	0	0	0	0	1	1	0	1	0	0	0	0	0	0
Peak6158	2R	20257054	20257597	intron	0.909333	0	0	1	0	0	0	0	0	0	0	0	0	0	0	0	0	0	0	0	0	0	0	0	0	0	0	0	0
Peak6176	2R	20449779	20450155	CDS	0.574511	0	0	1	0	0	0	0	0	0	0	0	0	0	0	0	0	0	0	0	0	0	0	0	0	0	0	0	0
Peak6178	2R	20466650	20466917	CDS	0.825131	0	0	1	0	1	0	0	0	0	0	1	0	0	0	0	1	0	0	1	1	0	0	0	0	0	0	1	0
Peak6179	2R	20467670	20468247	intergenic	0.591446	0	0	1	0	1	0	0	0	0	1	1	0	0	0	0	1	0	0	0	1	0	0	0	0	0	0	0	0
Peak6181	2R	20478367	20478692	intron	0.730809	0	0	1	0	0	0	0	0	0	0	0	0	0	0	0	0	0	0	0	0	0	0	0	0	0	0	0	0
Peak6182	2R	20481207	20481724	intron	1.11688	0	0	1	0	0	0	0	0	0	0	0	0	0	0	0	0	0	0	1	1	0	1	0	0	0	0	0	0
Peak6186	2R	20548871	20549136	promoter	0.454687	0	0	1	0	0	0	0	0	0	0	0	0	0	0	0	0	0	0	0	0	0	0	0	0	0	0	0	0
Peak6187	2R	20550228	20550432	UTR	0.56313	0	0	1	0	0	0	0	0	0	0	0	0	0	0	0	0	0	0	0	0	0	0	0	0	0	0	0	0
Peak6188	2R	20551329	20554417	promoter	0.709138	0	0	1	0	0	0	0	0	0	0	0	0	0	0	0	0	0	0	0	0	0	0	0	0	0	0	0	0
Peak6193	2R	20608437	20608679	intron	0.831054	0	0	1	0	0	0	0	0	0	0	0	0	0	0	0	0	0	0	0	0	0	0	0	0	0	0	0	0
Peak6194	2R	20610088	20610362	intron	0.889008	0	0	1	0	0	0	0	0	0	0	0	0	0	0	0	0	0	0	0	0	0	0	0	0	0	0	0	0
Peak6195	2R	20614970	20615490	intron	0.749361	0	0	1	0	0	0	0	0	0	0	1	0	0	0	0	1	0	0	1	1	0	1	0	0	0	0	0	0
Peak6203	2R	20640582	20641050	CDS	0.636387	0	0	1	0	0	0	0	0	0	0	0	0	0	0	0	0	0	0	0	0	0	0	0	0	0	0	0	0
Peak6210	2R	20684827	20685138	promoter	0.5248	0	0	1	0	0	0	0	0	0	0	0	0	0	0	0	0	0	0	0	0	0	0	0	0	0	0	0	0
Peak6211	2R	20688075	20688831	intergenic	1.78954	0	0	1	0	0	0	0	0	0	0	0	0	0	0	0	0	0	0	0	0	0	0	0	0	0	0	0	0
Peak6212	2R	20690561	20690998	intergenic	0.476948	0	0	1	0	0	0	0	0	0	0	0	0	0	0	0	0	0	0	0	0	0	0	0	0	0	0	0	0
Peak6213	2R	20695915	20696624	intergenic	2.35429	0	0	1	0	0	0	0	0	0	0	0	0	0	0	0	0	0	0	0	0	0	1	0	0	1	0	0	0
Peak6214	2R	20699523	20699968	intergenic	1.20896	0	0	1	0	0	0	0	0	0	0	0	0	0	0	0	0	0	0	0	1	0	1	0	0	0	0	0	0
Peak6218	2R	20728174	20728434	intergenic	1.69476	0	0	1	0	0	0	0	0	0	1	1	0	0	0	0	1	0	0	1	1	0	0	0	0	0	0	0	0
Peak6219	2R	20732217	20732783	intergenic	0.554137	0	0	1	0	0	0	0	0	0	0	0	0	0	1	1	0	0	0	0	0	0	1	0	0	1	0	0	0
Peak6220	2R	20742123	20742586	intergenic	1.16723	0	0	1	0	0	0	0	0	0	0	0	0	0	0	0	0	0	0	0	0	0	0	0	0	0	0	0	0
Peak6221	2R	20742804	20743348	intergenic	0.658123	0	0	1	0	0	0	0	0	0	0	0	0	0	0	0	0	0	0	0	0	0	0	0	0	0	0	0	0
Peak6227	2R	20765222	20765497	intron	0.916317	0	0	1	0	0	0	0	0	0	0	0	0	0	0	0	0	0	0	0	0	0	0	0	0	0	0	0	0
Peak6229	2R	20769931	20770696	promoter	0.443537	0	0	1	0	1	0	0	0	0	0	0	0	0	0	0	0	0	0	0	0	0	0	0	0	0	0	0	0
Peak6230	2R	20778751	20779711	promoter	0.588502	0	0	1	0	0	0	0	0	0	0	0	0	0	0	0	0	0	0	0	0	0	0	0	0	0	0	0	0
Peak6235	2R	20809793	20810003	CDS	0.763787	0	0	1	0	0	0	0	0	0	0	0	0	1	0	0	0	0	1	1	0	1	1	0	0	0	0	1	0
Peak6236	2R	20818585	20819026	CDS	0.779721	0	0	1	0	0	0	0	0	0	0	0	0	0	0	0	0	0	0	0	0	0	0	0	0	0	0	0	0
Peak6246	2R	20858557	20859029	CDS	0.804704	0	0	1	0	0	0	0	0	0	0	0	0	0	0	0	0	0	0	0	0	0	0	0	0	0	0	0	0
Peak6247	2R	20864606	20865274	CDS	0.51967	0	0	1	0	0	0	0	0	0	0	0	0	1	0	0	0	0	0	0	0	0	1	0	0	0	0	0	0
Peak6249	2R	20868549	20868948	promoter	0.77145	0	0	1	0	0	1	0	0	0	0	1	0	0	0	0	0	0	0	0	1	0	0	1	0	0	0	0	0
Peak6256	2R	20879590	20880718	CDS	0.395798	0	0	1	1	1	1	0	0	0	1	1	1	0	0	1	1	1	0	1	1	1	1	0	0	0	0	0	0
Peak6268	2R	20893428	20895152	CDS	0.233595	0	0	1	0	0	0	0	0	0	0	0	0	0	1	1	0	0	0	0	0	0	0	0	0	0	0	0	0
Peak6272	2R	20902715	20903302	intron	0.399587	0	0	1	1	1	0	0	0	0	1	1	0	0	0	1	1	0	0	1	1	1	0	0	0	1	0	1	0
Peak6273	2R	20903355	20904102	intron	0.536173	0	0	1	0	1	0	0	0	0	1	1	0	0	0	1	1	0	0	1	1	0	0	0	0	0	0	1	0
Peak6274	2R	20905640	20906192	intron	1.26775	0	0	1	0	0	1	0	0	0	0	0	0	0	0	0	0	0	0	0	0	0	1	0	0	0	0	0	0
Peak6278	2R	20926463	20926791	CDS	0.275594	0	0	1	0	0	0	0	0	0	0	0	0	0	0	0	0	0	0	0	0	0	0	0	0	0	0	0	0
Peak6279	2R	20932624	20933036	intron	0.941515	0	0	1	0	0	0	0	0	0	0	0	0	0	0	0	0	0	0	0	1	0	0	0	0	0	0	0	0
Peak6281	2R	20938326	20938933	CDS	0.488386	0	0	1	0	0	1	0	0	0	0	0	0	0	0	1	0	0	0	0	0	0	0	0	0	0	0	0	0
Peak6282	2R	20939982	20940262	intergenic	0.728495	0	0	1	1	0	0	0	0	0	0	0	0	0	0	1	0	0	0	0	0	0	0	1	0	0	0	0	0
Peak6283	2R	20940315	20940405	intergenic	0.752778	0	0	1	0	0	0	0	0	0	0	0	0	0	0	0	0	0	0	0	0	0	0	0	0	1	0	0	0
Peak6284	2R	20940901	20941239	intergenic	0.723014	0	0	1	0	0	1	0	0	0	0	0	0	0	1	1	0	1	0	0	0	0	0	0	0	0	0	0	0
Peak6285	2R	20942127	20942495	intergenic	0.753809	0	0	1	0	0	0	0	0	0	0	0	0	0	0	0	0	0	0	0	0	0	0	0	0	0	0	0	0
Peak6286	2R	20944104	20945079	intergenic	0.383112	0	0	1	0	0	0	0	0	0	0	0	0	0	0	0	0	0	0	0	0	0	0	0	0	0	0	0	0
Peak6287	2R	20946750	20947049	intergenic	0.611347	0	0	1	1	1	1	0	0	0	0	0	0	0	0	1	0	1	0	0	0	0	0	0	0	0	0	0	0
Peak6289	2R	20952880	20953536	intergenic	0.848469	0	0	1	0	0	0	0	0	0	0	0	0	0	0	0	0	0	0	0	0	0	0	0	0	0	0	0	0
Peak6291	2R	20957057	20957473	intergenic	1.57058	0	0	1	0	0	0	0	0	0	0	0	0	0	0	0	0	0	0	0	0	0	0	0	0	0	0	0	0
Peak6292	2R	20957547	20957746	intergenic	1.21881	0	0	1	0	0	0	0	0	0	0	0	0	0	0	0	1	0	0	1	1	0	1	0	0	0	0	0	0
Peak6294	2R	20962243	20962631	CDS	0.53429	0	0	1	0	0	1	0	0	0	1	1	0	1	0	0	0	0	1	1	1	0	1	0	0	0	0	0	0
Peak6296	2R	20968862	20969063	intron	0.916565	0	0	1	0	0	0	0	0	0	0	0	0	0	0	0	0	0	0	0	0	0	0	0	0	0	0	0	0
Peak6303	2R	20985674	20986307	promoter	0.792732	0	0	1	0	1	0	0	0	0	0	0	0	0	0	1	1	0	0	1	1	0	0	0	0	0	0	1	0
Peak6305	2R	20987613	20988545	intron	0.641125	0	0	1	0	0	0	0	0	0	0	0	0	0	0	0	0	0	0	0	0	0	0	0	0	0	0	0	0
Peak6306	2R	20989269	20989673	intron	0.852844	0	0	1	0	0	0	0	0	0	0	0	0	0	1	1	0	0	0	0	0	0	0	0	0	0	0	0	0
Peak6307	2R	20995174	20995528	intron	1.62389	0	0	1	0	0	0	0	0	0	0	0	0	0	0	0	0	0	0	0	0	0	0	0	0	0	0	0	0
Peak6310	2R	21014941	21015285	intron	0.922288	0	0	1	0	0	0	0	0	0	0	0	0	0	0	0	0	0	0	0	0	0	0	0	0	0	0	0	0
Peak6314	2R	21075353	21075698	CDS	0.726954	0	0	1	0	0	0	0	0	0	0	0	0	0	0	0	0	0	0	0	0	0	0	0	0	0	0	0	0
Peak6317	2R	21079720	21080146	intron	1.02821	0	0	1	0	0	0	0	0	0	1	1	0	0	0	1	0	0	0	1	1	0	1	0	0	0	0	0	0
Peak6318	2R	21084451	21084787	intron	0.672027	0	0	1	0	0	0	0	0	0	0	1	0	0	0	0	0	0	0	1	1	0	1	0	0	0	0	0	0
Peak6319	2R	21085808	21086306	intron	1.15457	0	0	1	0	0	0	0	0	0	0	0	0	0	0	0	0	0	0	1	0	0	1	0	0	0	0	0	0
Peak6320	2R	21086954	21087208	intron	0.645663	0	0	1	0	0	0	0	0	0	0	0	0	1	0	0	0	0	1	1	1	0	0	0	0	1	0	1	0
Peak6323	2R	21092409	21092664	intron	1.02354	0	0	1	0	0	0	0	0	0	0	0	0	0	0	0	0	0	0	0	0	0	0	0	0	0	0	0	0
Peak6326	2R	21103529	21103752	intron	1.30276	0	0	1	0	0	0	0	0	0	0	0	0	0	0	0	0	0	0	1	1	0	0	0	0	0	0	0	0
Peak6328	2R	21106754	21107218	intron	0.938377	0	0	1	1	0	0	0	0	0	1	0	0	0	0	1	1	0	1	1	1	0	1	0	0	0	0	0	0
Peak6329	2R	21110352	21110947	intron	2.21916	0	0	1	0	0	0	0	0	0	0	0	0	0	0	0	0	0	0	0	0	0	0	0	0	0	0	0	0
Peak6330	2R	21112644	21116464	promoter	1.20399	0	0	1	0	0	0	0	0	0	0	0	0	0	0	0	0	0	0	1	1	0	0	0	0	0	0	0	0
Peak6331	2R	21120074	21120305	intron	1.33289	0	0	1	0	0	0	0	1	0	0	0	0	0	1	1	0	0	0	0	1	0	0	0	0	0	0	0	0
Peak6332	2R	21140434	21140901	promoter	1.16266	0	0	1	0	0	0	0	0	0	0	0	0	0	0	0	0	0	0	1	1	0	0	0	0	0	0	0	0
Peak6333	2R	21141139	21141532	CDS	0.832535	0	0	1	0	0	0	0	0	0	0	0	0	0	0	0	0	0	0	0	1	0	1	0	0	0	0	0	0
Peak6334	2R	21143164	21143539	intergenic	1.62305	0	0	1	0	0	0	0	0	0	0	0	0	0	0	0	0	0	0	0	0	0	0	0	0	0	0	0	0
Peak6335	2R	21144746	21145352	intergenic	0.734485	0	0	1	0	0	0	0	0	0	0	0	0	0	0	0	0	0	0	0	0	0	0	0	0	0	0	0	0
Peak6336	2R	21145568	21146708	intergenic	2.04466	0	0	1	0	0	0	0	0	0	0	0	0	0	0	0	0	0	0	0	0	0	0	0	0	0	0	0	0
Peak6339	3L	41758	42047	intergenic	0.435733	0	0	1	0	0	0	0	0	0	0	0	0	1	0	0	0	0	0	1	0	0	1	0	0	0	0	0	0
Peak6342	3L	48813	49235	intergenic	0.736133	0	0	1	0	0	1	0	0	0	0	0	0	0	0	0	0	0	0	0	1	0	0	0	0	0	0	0	0
Peak6343	3L	49559	50156	intergenic	0.987804	0	0	1	0	0	0	0	0	0	0	1	0	0	0	0	0	0	0	0	1	0	0	0	0	0	0	1	0
Peak6344	3L	50764	51317	intergenic	0.849831	0	0	1	1	0	1	0	0	0	0	0	0	0	0	0	0	0	0	0	0	0	0	0	0	0	0	0	0
Peak6347	3L	55273	55566	intergenic	0.984733	0	0	1	0	0	0	0	0	0	0	0	0	0	0	0	0	0	0	0	0	0	0	0	0	0	0	0	0
Peak6348	3L	60311	60656	intergenic	1.30595	0	0	1	0	0	1	0	0	0	0	0	0	0	0	0	0	0	0	1	1	0	0	0	0	0	0	0	0
Peak6349	3L	67637	68225	CDS	0.590408	0	0	1	0	0	0	0	0	0	1	0	0	1	0	0	0	0	1	1	0	0	1	0	0	0	0	0	0
Peak6354	3L	129233	129856	promoter	0.426253	0	0	1	0	0	0	0	0	0	0	0	0	0	0	0	0	0	0	0	0	0	0	0	0	0	0	0	0
Peak6355	3L	130828	132046	promoter	0.670869	0	0	1	0	0	0	0	0	0	0	0	0	0	0	0	0	0	0	0	0	0	0	0	0	0	0	0	0
Peak6360	3L	139937	140130	intron	0.742758	0	0	1	0	0	0	0	0	0	0	1	0	0	0	0	0	0	0	1	1	0	0	0	0	0	0	0	0
Peak6363	3L	151380	151674	CDS	0.906049	0	0	1	0	0	0	0	0	0	0	1	0	0	0	0	1	0	0	0	1	0	0	1	0	0	0	1	0
Peak6364	3L	153598	153967	intron	0.564001	0	0	1	0	0	1	0	0	0	0	0	0	0	0	1	0	0	0	0	0	0	0	0	0	0	0	0	0
Peak6365	3L	157658	158157	CDS	0.878945	0	0	1	0	0	0	0	0	0	0	0	0	0	0	0	0	0	1	1	0	0	1	0	0	0	0	0	0
Peak6367	3L	161928	162157	intron	0.877229	0	0	1	1	1	0	0	0	0	1	1	0	1	0	1	1	0	0	1	1	0	1	0	0	0	0	0	0
Peak6368	3L	166213	166611	intron	0.637739	0	0	1	0	0	0	0	0	0	0	1	0	0	0	0	0	0	0	1	1	0	0	0	0	1	0	1	0
Peak6369	3L	171063	171425	intron	1.1507	0	0	1	0	0	0	0	0	0	0	0	0	0	0	0	0	0	0	0	0	0	0	0	0	0	0	0	0
Peak6373	3L	177913	178908	promoter	0.521143	0	0	1	0	0	0	0	0	0	0	0	0	0	0	1	0	0	0	0	0	0	0	0	0	0	0	0	0
Peak6376	3L	189461	189908	CDS	0.746487	0	0	1	1	1	1	1	0	0	1	0	1	1	0	1	1	1	1	1	1	1	1	0	0	0	0	0	0
Peak6417	3L	265662	265934	promoter	0.461339	0	0	1	0	0	0	0	0	0	1	0	0	0	0	1	0	0	0	1	0	0	0	0	0	0	0	0	0
Peak6424	3L	278650	279006	CDS	1.03495	0	0	1	0	0	0	0	0	0	1	0	0	1	0	1	0	0	1	1	0	0	1	0	0	0	0	0	0
Peak6430	3L	300673	302439	CDS	0.370727	0	0	1	0	0	0	0	0	0	1	0	0	0	0	0	0	0	0	1	0	0	0	0	0	0	0	0	0
Peak6431	3L	302564	303967	CDS	0.414584	0	0	1	0	0	0	0	0	0	0	0	0	0	0	0	0	0	0	0	0	0	0	0	0	0	0	0	0
Peak6448	3L	345002	345841	CDS	0.980901	0	0	1	0	0	0	0	0	0	1	1	0	0	0	0	0	0	0	1	1	0	0	0	0	1	0	1	0
Peak6450	3L	349139	349847	intron	0.778944	0	0	1	0	0	0	0	0	0	0	1	0	0	0	0	1	0	0	0	1	0	0	0	0	0	0	0	0
Peak6451	3L	360960	361782	promoter	0.314838	0	0	1	0	0	0	0	0	0	0	0	0	0	0	0	0	0	0	0	1	0	0	0	0	0	0	0	0
Peak6453	3L	373652	374271	CDS	0.831094	0	0	1	0	0	0	0	0	0	0	0	0	0	0	0	0	0	0	0	0	0	0	0	0	0	0	0	0
Peak6458	3L	381189	381441	intron	1.04383	0	0	1	0	0	0	0	0	0	0	0	0	0	0	0	0	0	0	0	0	0	0	0	0	0	0	0	0
Peak6460	3L	396903	397213	intergenic	1.64066	0	0	1	0	0	1	0	0	0	0	0	0	0	0	0	0	0	0	0	0	0	0	0	0	0	0	0	0
Peak6461	3L	416214	416630	intergenic	0.913079	0	0	1	0	0	0	0	0	0	0	0	0	0	0	0	0	0	0	0	0	0	0	0	0	0	0	0	0
Peak6477	3L	478712	479023	intron	0.500713	0	0	1	0	0	0	0	0	1	1	0	0	0	1	0	1	0	0	1	1	1	1	1	0	1	0	0	0
Peak6480	3L	487129	487636	intron	0.74994	0	0	1	0	0	0	0	0	0	1	0	0	0	1	0	0	0	0	1	0	0	1	1	0	0	0	0	0
Peak6488	3L	524356	524662	intron	0.763357	0	0	1	0	0	0	0	0	1	1	0	0	0	1	0	0	0	0	1	1	1	1	1	0	0	0	0	0
Peak6496	3L	549678	550157	intron	0.743357	0	0	1	0	0	0	0	0	0	1	0	0	0	1	0	1	0	0	1	0	1	1	1	0	0	0	0	0
Peak6499	3L	552315	552644	intron	0.589763	0	0	1	0	0	0	0	0	0	0	0	0	0	1	0	1	0	0	1	0	1	1	1	0	0	0	0	0
Peak6505	3L	569083	569880	promoter	0.481339	0	0	1	0	0	0	0	0	0	0	0	0	0	1	0	1	0	0	1	0	1	1	1	0	0	0	0	0
Peak6508	3L	589224	589950	promoter	0.76223	0	0	1	0	1	1	0	0	0	1	1	0	0	0	0	0	0	0	1	1	0	1	0	0	0	0	0	0
Peak6511	3L	613072	613663	intergenic	0.649973	0	0	1	0	1	0	0	0	0	1	1	1	1	0	1	1	0	0	1	1	1	1	0	0	0	0	0	0
Peak6512	3L	613786	614464	intergenic	0.633665	0	0	1	0	0	0	0	0	0	0	0	0	0	0	0	0	0	0	0	0	0	0	0	0	0	0	0	0
Peak6515	3L	618619	619286	intergenic	1.12577	0	0	1	0	0	0	0	0	0	1	1	0	0	0	0	0	0	0	1	1	0	0	0	0	0	0	0	0
Peak6520	3L	624192	624585	intergenic	0.676736	0	0	1	0	0	0	0	0	0	0	0	0	0	0	0	0	0	0	0	0	0	0	0	0	0	0	0	0
Peak6523	3L	637418	637806	intergenic	0.480767	0	0	1	0	0	0	0	0	0	0	0	0	0	0	0	0	0	0	0	0	0	0	0	0	0	0	0	0
Peak6533	3L	664672	664900	intergenic	0.757398	0	0	1	0	0	0	0	0	0	0	0	0	0	0	0	0	0	0	0	0	0	1	0	0	0	0	0	0
Peak6535	3L	675904	676210	intergenic	0.883955	0	0	1	0	0	0	0	0	0	0	0	0	0	0	0	0	0	0	0	0	0	0	0	0	0	0	0	0
Peak6539	3L	690366	690794	promoter	0.280986	0	0	1	0	0	0	0	0	0	0	0	0	0	0	0	1	0	0	1	1	0	0	0	0	0	0	1	0
Peak6542	3L	695552	696891	intron	0.954961	0	0	1	0	0	0	0	0	0	0	0	0	0	0	0	0	0	0	0	1	0	0	0	0	0	0	0	0
Peak6546	3L	702208	702558	intergenic	1.30264	0	0	1	0	0	0	0	1	0	0	0	0	0	1	0	0	0	0	0	0	0	0	0	0	0	0	0	0
Peak6557	3L	726190	727385	intergenic	0.623028	0	0	1	0	0	0	0	0	0	0	0	0	0	0	0	0	0	0	0	0	0	0	0	0	0	0	0	0
Peak6558	3L	735159	735755	intergenic	1.387	0	0	1	0	0	0	0	0	0	0	0	0	0	0	0	0	0	0	0	0	0	0	0	0	0	0	0	0
Peak6559	3L	738976	740166	promoter	0.324863	0	0	1	0	0	0	0	0	0	0	0	0	0	0	0	0	0	1	0	0	0	1	0	0	0	0	0	0
Peak6565	3L	744966	745686	intron	0.508368	0	0	1	0	0	0	0	0	0	0	0	0	0	0	0	0	0	0	0	0	0	0	0	0	0	0	0	0
Peak6566	3L	747497	748150	intron	0.455113	0	0	1	0	0	0	0	0	0	0	0	0	0	0	0	0	0	0	1	1	0	1	0	0	0	0	0	0
Peak6569	3L	753423	754366	intron	0.397121	0	0	1	0	0	0	0	0	0	0	0	0	0	0	0	0	0	0	0	0	0	1	0	0	0	0	0	0
Peak6570	3L	754833	755392	intron	0.464057	0	0	1	0	0	0	0	0	0	0	0	0	0	0	0	0	0	0	1	1	0	0	0	0	0	0	0	0
Peak6572	3L	756674	757096	intergenic	0.698518	0	0	1	0	0	0	0	0	0	1	1	0	0	0	0	0	0	0	1	1	0	1	0	0	0	0	0	0
Peak6573	3L	760465	760806	intergenic	0.76724	0	0	1	0	0	1	0	0	0	1	0	0	0	0	0	0	0	0	0	0	0	0	0	0	0	0	0	0
Peak6574	3L	761962	763000	intergenic	0.759952	0	0	1	0	0	0	0	0	0	0	0	0	0	0	0	0	0	0	0	0	0	0	0	0	0	0	0	0
Peak6575	3L	766081	766367	intergenic	0.902398	0	0	1	0	0	0	0	0	0	0	0	0	0	0	0	0	0	0	0	0	0	0	0	0	0	0	0	0
Peak6576	3L	769288	769700	intergenic	0.490039	0	0	1	0	0	0	0	0	0	0	0	0	0	0	0	0	0	0	0	0	0	0	0	0	0	0	0	0
Peak6577	3L	770202	770637	intergenic	0.714045	0	0	1	0	0	0	0	0	0	0	0	0	0	0	0	0	0	0	0	0	0	0	0	0	0	0	0	0
Peak6580	3L	793915	794574	intergenic	0.622713	0	0	1	0	0	0	0	0	0	0	0	0	0	0	0	0	0	0	1	1	0	1	0	0	0	0	0	0
Peak6581	3L	804395	804663	intergenic	0.46512	0	0	1	0	0	0	0	0	0	0	0	0	0	0	0	0	0	0	1	1	0	0	0	0	0	0	0	0
Peak6597	3L	866704	866979	intron	1.02751	0	0	1	0	0	0	0	0	0	0	0	0	0	1	1	0	0	0	0	0	0	0	0	0	0	0	0	0
Peak6601	3L	890208	890846	CDS	1.44007	0	0	1	0	0	1	0	0	0	0	0	0	0	0	0	0	0	0	0	0	0	0	0	0	0	0	0	0
Peak6602	3L	891650	892191	CDS	0.717429	0	0	1	0	0	0	0	0	0	0	0	0	0	0	0	0	0	0	0	1	0	0	0	0	0	0	0	0
Peak6603	3L	900196	900841	intergenic	1.29299	0	0	1	0	0	0	0	0	0	0	0	0	0	0	0	0	0	0	0	0	0	0	0	0	0	0	0	0
Peak6605	3L	905236	905953	intergenic	0.409995	0	0	1	0	0	0	0	0	0	0	0	0	0	0	0	0	0	0	0	0	0	0	0	0	0	0	0	0
Peak6606	3L	908088	909303	promoter	0.69575	0	0	1	0	0	0	0	0	0	0	1	0	0	0	0	0	0	0	0	1	0	0	0	0	0	0	0	0
Peak6607	3L	914896	915210	intron	0.665248	0	0	1	0	0	0	0	0	0	0	0	0	0	0	0	0	0	0	0	0	0	0	0	0	0	0	0	0
Peak6608	3L	959395	959691	promoter	0.718087	0	0	1	0	0	0	0	0	0	0	0	0	0	0	0	0	0	0	0	1	0	0	0	0	0	0	0	0
Peak6611	3L	1095830	1096444	intron	1.09758	0	0	1	1	0	1	0	0	0	0	0	0	0	0	1	0	0	0	0	1	0	0	1	0	0	1	1	0
Peak6616	3L	1108644	1108974	intergenic	1.08885	0	0	1	0	0	0	0	0	0	0	0	0	0	0	0	0	0	0	0	0	0	0	0	0	0	0	0	0
Peak6617	3L	1165942	1166704	intron	0.717787	0	0	1	0	0	0	0	0	0	0	0	0	0	0	1	0	0	0	0	0	0	0	0	0	0	0	0	0
Peak6618	3L	1167195	1167645	intron	1.70374	0	0	1	0	0	0	0	0	0	0	0	0	0	0	0	0	0	0	0	0	0	0	0	0	0	0	0	0
Peak6619	3L	1167731	1167947	intron	1.21006	0	0	1	0	0	0	0	0	0	1	1	0	0	0	0	0	0	0	1	1	0	0	0	0	0	0	0	0
Peak6620	3L	1177001	1177534	promoter	0.606474	0	0	1	0	0	0	0	0	0	0	0	0	0	0	0	0	0	0	1	0	0	0	0	0	0	0	0	0
Peak6621	3L	1177881	1178738	intergenic	0.742598	0	0	1	0	0	0	0	0	0	0	0	0	0	0	0	0	0	0	0	0	0	0	0	0	0	0	0	0
Peak6637	3L	1325130	1325459	intron	0.925186	0	0	1	0	0	0	0	0	0	0	0	0	0	0	0	0	0	0	0	0	0	0	0	0	0	0	0	0
Peak6643	3L	1344172	1344838	CDS	0.928609	0	0	1	0	0	0	0	0	0	0	0	0	0	1	1	0	0	1	0	0	0	0	0	0	0	0	0	0
Peak6649	3L	1364203	1364751	intron	1.06756	0	0	1	0	0	0	0	0	0	0	0	0	0	1	1	0	0	0	0	0	0	0	0	0	0	0	0	0
Peak6657	3L	1397499	1397819	intron	0.603307	0	0	1	0	0	0	0	0	0	0	0	0	0	0	0	0	0	0	0	0	0	0	0	0	0	0	0	0
Peak6660	3L	1404022	1404961	intron	0.714301	0	0	1	0	0	0	0	0	0	0	0	0	0	0	0	0	0	0	0	0	0	0	0	0	0	0	0	0
Peak6661	3L	1410094	1410954	intron	0.783269	0	0	1	0	0	0	0	0	0	0	0	0	0	0	0	0	0	1	0	0	0	0	0	0	0	0	0	0
Peak6662	3L	1413857	1414458	intron	1.36155	0	0	1	0	0	0	0	0	0	0	0	0	0	0	0	0	0	0	0	0	0	0	0	0	0	0	0	0
Peak6663	3L	1431475	1431734	intron	0.643749	0	0	1	0	1	1	0	0	0	1	1	0	0	0	1	1	0	0	1	1	1	1	0	0	0	0	1	0
Peak6665	3L	1433214	1433452	intron	1.19248	0	0	1	0	0	0	0	0	0	0	0	0	0	0	0	0	0	0	0	1	0	0	0	0	0	0	0	0
Peak6667	3L	1443710	1443970	intron	2.02417	0	0	1	0	0	0	0	0	0	0	1	0	0	0	0	0	0	0	0	1	0	0	0	0	0	0	0	0
Peak6669	3L	1447284	1447683	intron	0.643739	0	0	1	0	0	0	0	0	0	0	0	0	0	0	0	0	0	0	1	1	0	0	0	0	0	0	0	0
Peak6670	3L	1447760	1448393	intron	1.16485	0	0	1	0	0	0	0	0	0	1	0	0	0	0	1	1	0	0	1	1	0	0	0	0	0	0	0	0
Peak6671	3L	1456154	1456742	intron	0.911849	0	0	1	0	0	0	0	0	0	0	0	0	1	0	1	0	0	1	1	0	1	1	0	0	0	0	1	0
Peak6674	3L	1461620	1462867	intron	0.439175	0	0	1	0	0	0	0	0	0	0	0	0	0	0	0	0	0	0	0	0	0	1	0	0	0	0	0	0
Peak6680	3L	1470971	1471394	intron	0.756395	0	0	1	0	0	0	0	0	0	0	0	0	0	0	0	0	0	1	0	0	0	0	0	0	0	0	0	0
Peak6681	3L	1478874	1480153	promoter	0.451199	0	0	1	0	0	0	0	0	0	0	0	0	0	0	0	0	0	0	0	0	0	0	0	0	0	0	0	0
Peak6682	3L	1485456	1485818	intron	0.704321	0	0	1	0	0	0	0	0	0	0	0	0	0	0	0	0	0	0	0	0	0	0	0	0	0	0	0	0
Peak6683	3L	1486797	1487319	intron	0.58163	0	0	1	0	0	0	0	0	0	0	0	0	0	0	0	0	0	0	0	0	0	0	0	0	0	0	0	0
Peak6686	3L	1492167	1492434	CDS	0.735331	0	0	1	0	0	0	0	0	0	0	0	0	0	0	0	0	0	0	0	0	0	0	0	0	0	0	0	0
Peak6689	3L	1501201	1502973	promoter	0.390483	0	0	1	0	0	0	0	0	0	0	0	0	0	0	0	0	0	0	0	0	0	0	0	0	0	0	0	0
Peak6692	3L	1538489	1539714	CDS	0.701431	0	0	1	0	0	0	0	0	0	0	0	0	0	0	0	0	0	0	0	0	0	0	0	0	0	0	0	0
Peak6696	3L	1549108	1549467	intron	0.762656	0	0	1	0	0	0	0	0	0	0	0	0	0	0	0	0	0	0	0	0	0	0	0	0	0	0	0	0
Peak6703	3L	1566158	1567588	CDS	0.406535	0	0	1	0	0	0	0	0	0	0	0	0	0	0	0	0	0	0	0	1	0	0	0	0	0	0	0	0
Peak6707	3L	1572368	1573354	CDS	0.761972	0	0	1	1	0	0	0	0	0	0	0	0	0	0	0	0	0	0	0	0	0	0	0	0	0	0	0	0
Peak6708	3L	1573457	1573917	intron	0.784598	0	0	1	0	0	0	0	0	0	0	0	0	0	0	0	0	0	0	0	1	0	0	0	0	0	0	0	0
Peak6712	3L	1577047	1577736	intron	0.421549	0	0	1	0	0	0	0	0	0	0	0	0	0	0	0	0	0	0	1	0	0	0	0	0	0	0	0	0
Peak6721	3L	1628009	1628572	promoter	0.602405	0	0	1	1	0	1	0	0	0	1	0	0	0	0	1	0	1	1	0	0	0	0	0	0	0	0	0	0
Peak6723	3L	1645107	1646387	promoter	0.39815	0	0	1	0	0	0	0	0	0	0	0	0	0	0	0	0	0	0	0	0	0	0	0	0	0	0	0	0
Peak6726	3L	1657561	1657860	CDS	1.2365	0	0	1	0	0	0	0	0	0	0	0	0	0	0	0	0	0	0	0	1	0	0	0	0	0	0	0	0
Peak6729	3L	1688578	1688835	promoter	0.758422	0	0	1	0	0	0	0	0	0	0	0	0	0	1	1	0	1	1	0	0	0	0	0	0	0	0	0	0
Peak6730	3L	1697132	1697393	intron	1.34428	0	0	1	0	0	0	0	0	0	0	0	0	0	0	0	0	0	0	0	1	0	0	0	0	0	0	0	0
Peak6736	3L	1753135	1753793	CDS	0.811082	0	0	1	0	0	0	0	0	0	0	0	0	0	0	0	0	0	0	0	0	0	0	0	0	0	0	0	0
Peak6737	3L	1757938	1758401	CDS	0.617268	0	0	1	0	0	0	0	0	0	0	0	0	0	0	0	0	0	0	0	1	0	0	0	0	0	0	0	0
Peak6738	3L	1772341	1773430	CDS	0.359034	0	0	1	0	0	0	0	0	0	0	0	0	0	0	0	0	0	0	0	0	0	0	0	0	0	0	0	0
Peak6748	3L	1860711	1862368	promoter	0.274651	0	0	1	0	0	0	0	0	0	0	0	0	0	0	0	0	0	0	0	0	0	0	0	0	0	0	0	0
Peak6754	3L	1886008	1886682	intron	0.868868	0	0	1	0	0	0	0	0	0	0	0	0	0	0	0	0	0	0	0	0	0	0	0	0	0	0	0	0
Peak6755	3L	1888439	1888801	intron	0.80543	0	0	1	1	0	0	0	0	0	0	0	0	0	0	1	0	0	0	0	0	0	0	1	0	0	0	0	0
Peak6756	3L	1889979	1890469	CDS	0.678994	0	0	1	0	0	0	0	0	0	0	0	0	0	0	0	0	0	0	0	0	0	0	0	0	0	0	0	0
Peak6758	3L	1896551	1896815	intron	0.651492	0	0	1	0	0	0	0	0	0	0	0	0	0	0	0	0	0	0	0	0	0	0	0	0	0	0	0	0
Peak6760	3L	1916644	1916952	intergenic	0.682497	0	0	1	0	0	0	0	0	0	0	0	0	0	0	0	0	0	0	0	0	0	0	0	0	0	0	0	0
Peak6771	3L	2196973	2197694	promoter	0.840564	0	0	1	0	0	0	0	0	0	0	0	0	0	0	0	0	0	0	0	0	0	0	0	0	0	0	0	0
Peak6775	3L	2265584	2266012	promoter	0.570498	0	0	1	0	0	0	0	0	0	0	0	0	0	0	0	0	0	0	0	0	0	0	0	0	0	0	0	0
Peak6776	3L	2371834	2372372	promoter	0.321297	0	0	1	0	0	0	0	0	0	0	0	0	0	0	0	0	0	0	0	0	0	0	0	0	0	0	0	0
Peak6781	3L	2379026	2379268	promoter	0.610801	0	0	1	0	0	0	0	0	0	0	0	0	0	1	1	0	0	1	0	1	0	0	0	0	0	0	0	0
Peak6784	3L	2392808	2393130	intron	0.727061	0	0	1	0	0	0	0	0	0	0	0	0	0	0	0	0	0	0	0	0	0	0	0	0	0	0	0	0
Peak6785	3L	2393231	2393948	intron	0.720272	0	0	1	0	0	0	0	0	0	0	0	0	0	0	1	1	0	0	1	1	0	0	0	0	0	0	0	0
Peak6787	3L	2407683	2408370	CDS	0.66852	0	0	1	0	0	0	0	0	0	0	0	0	0	0	0	0	0	0	0	0	0	0	0	0	0	0	0	0
Peak6789	3L	2428628	2429008	intron	0.696456	0	0	1	0	0	0	0	0	0	0	0	0	0	1	1	0	0	1	0	0	0	0	0	0	0	0	0	0
Peak6790	3L	2433815	2434166	intron	0.795913	0	0	1	0	0	0	0	0	0	0	1	0	0	0	0	0	0	1	1	1	0	0	0	0	1	0	1	0
Peak6794	3L	2442355	2443074	CDS	0.562342	0	0	1	0	0	0	0	0	0	0	0	0	0	0	0	0	0	0	0	0	0	0	0	0	0	0	0	0
Peak6797	3L	2444351	2447534	CDS	0.6289	0	0	1	0	0	0	0	0	0	0	0	0	0	0	0	0	0	0	0	0	0	0	0	0	0	0	0	0
Peak6799	3L	2457535	2458779	promoter	0.555256	0	0	1	0	0	0	0	0	0	1	0	0	1	0	1	0	1	1	1	0	1	1	0	0	0	0	1	0
Peak6801	3L	2459528	2461440	promoter	0.608861	0	0	1	0	0	1	0	0	0	0	1	0	0	1	0	0	0	0	0	1	0	0	1	0	0	0	1	0
Peak6802	3L	2461945	2462232	intron	0.717012	0	0	1	0	0	0	0	0	0	0	0	0	0	0	0	0	0	0	0	0	0	0	0	0	0	0	0	0
Peak6803	3L	2462482	2464560	promoter	0.562331	0	0	1	0	0	0	0	0	0	0	0	0	0	0	0	0	0	0	0	1	0	0	0	0	0	0	0	0
Peak6804	3L	2464769	2466225	CDS	0.472004	0	0	1	0	1	0	0	0	0	0	0	0	0	1	0	0	0	0	1	1	0	0	0	0	0	0	0	0
Peak6806	3L	2468488	2469103	intron	0.570793	0	0	1	0	0	0	0	0	0	0	0	0	0	0	0	0	0	0	0	0	0	0	0	0	0	0	0	0
Peak6810	3L	2476580	2477488	CDS	0.63317	0	0	1	0	1	0	0	0	0	0	1	0	0	0	0	0	0	0	1	1	0	0	0	0	0	0	1	0
Peak6811	3L	2477713	2478025	CDS	0.470916	0	0	1	0	0	0	0	0	0	0	0	0	0	0	0	0	0	0	0	0	0	0	0	0	0	0	0	0
Peak6816	3L	2485073	2485540	CDS	0.44313	0	0	1	0	1	0	0	0	0	1	1	0	0	0	1	1	0	0	1	1	0	0	0	0	0	0	0	0
Peak6817	3L	2485739	2486029	intron	1.66541	0	0	1	0	0	0	0	0	0	0	0	0	0	0	1	1	0	0	1	1	0	0	0	0	0	0	0	0
Peak6818	3L	2486156	2486677	intron	0.694258	0	0	1	0	0	0	0	0	0	0	0	0	0	0	0	0	0	0	0	0	0	0	0	0	0	0	0	0
Peak6820	3L	2488193	2488470	intron	0.530141	0	0	1	0	0	1	0	0	0	0	0	0	0	0	0	0	0	0	0	0	0	0	0	0	0	0	0	0
Peak6821	3L	2488652	2488875	promoter	0.759946	0	0	1	0	0	0	0	0	0	0	0	0	0	1	0	0	0	0	0	1	0	0	0	0	0	0	0	0
Peak6824	3L	2498435	2498932	CDS	0.548505	0	0	1	0	0	0	0	0	0	0	0	0	0	0	0	0	0	0	0	0	0	0	0	0	0	0	0	0
Peak6826	3L	2503422	2503870	promoter	0.67653	0	0	1	0	0	0	0	0	0	0	0	0	0	0	0	0	0	0	0	0	0	0	0	0	0	0	0	0
Peak6827	3L	2504847	2505249	UTR	1.01141	0	0	1	0	0	0	0	0	0	0	0	0	0	0	0	0	0	0	0	0	0	1	0	0	0	0	0	0
Peak6830	3L	2566094	2566827	CDS	0.650583	0	0	1	0	0	0	0	0	0	0	0	0	0	0	1	1	0	0	1	1	0	1	0	0	0	0	0	0
Peak6847	3L	2599152	2599746	promoter	0.62514	0	0	1	0	0	0	0	0	0	0	0	0	0	1	0	0	0	0	1	1	0	1	0	0	0	0	0	0
Peak6856	3L	2711446	2712199	promoter	0.931878	0	0	1	0	0	0	0	0	0	0	0	0	0	0	0	0	0	0	1	0	0	0	0	0	0	0	0	0
Peak6858	3L	2745794	2746015	intron	0.890646	0	0	1	0	1	1	0	0	0	0	0	0	0	0	0	0	0	0	0	0	0	0	0	0	0	0	0	0
Peak6862	3L	2772193	2772467	promoter	0.41254	0	0	1	0	0	0	0	0	0	0	0	0	0	1	1	0	0	0	0	0	0	0	0	0	0	0	0	0
Peak6864	3L	2774193	2775101	promoter	0.38436	0	0	1	0	0	1	0	0	0	0	0	0	0	0	0	0	0	0	0	0	0	0	0	0	0	0	0	0
Peak6868	3L	2798719	2799073	intron	1.11878	0	0	1	0	0	0	0	0	0	0	0	0	0	0	0	0	0	0	0	0	0	0	0	0	0	0	0	0
Peak6869	3L	2808109	2808608	intron	0.70336	0	0	1	0	0	0	0	0	0	0	0	0	0	0	0	0	0	0	0	0	0	0	0	0	0	0	0	0
Peak6870	3L	2812389	2812602	intron	0.858803	0	0	1	0	0	0	0	0	0	0	1	0	0	0	0	1	0	0	1	1	0	0	0	0	0	0	0	0
Peak6871	3L	2820954	2821430	promoter	0.672662	0	0	1	0	1	0	0	0	0	1	1	0	0	0	1	1	0	0	1	1	0	1	0	0	0	0	0	0
Peak6872	3L	2850401	2851119	intron	0.568016	0	0	1	0	0	0	0	0	0	0	0	0	0	0	0	0	0	1	0	0	0	1	0	0	0	0	0	0
Peak6873	3L	2851306	2851701	CDS	0.650718	0	0	1	0	0	0	0	0	0	0	0	0	0	0	0	0	0	0	0	0	0	1	0	0	0	0	0	0
Peak6875	3L	2852485	2853029	intron	0.626999	0	0	1	0	0	0	0	0	0	0	0	0	0	0	0	0	0	0	0	0	0	1	0	0	0	0	0	0
Peak6876	3L	2855464	2855850	intron	0.582627	0	0	1	1	1	0	0	0	0	0	0	0	0	0	0	0	0	0	0	0	0	0	0	0	0	0	0	0
Peak6881	3L	2865768	2866186	intron	0.541212	0	0	1	0	0	0	0	0	0	0	0	0	0	0	0	0	0	0	0	1	0	0	0	0	0	0	1	0
Peak6882	3L	2867251	2868189	intron	0.636718	0	0	1	0	0	0	0	0	0	0	0	0	0	0	0	0	0	0	1	1	0	0	0	0	0	0	1	0
Peak6886	3L	2874018	2874563	intron	0.993317	0	0	1	0	0	0	0	0	0	0	0	0	0	0	0	0	0	0	0	0	0	0	0	0	0	0	0	0
Peak6887	3L	2875081	2875661	intron	0.522772	0	0	1	0	0	0	0	0	0	0	0	0	0	0	0	0	0	0	0	0	0	0	0	0	0	0	0	0
Peak6891	3L	2884689	2885330	intron	0.631604	0	0	1	0	0	0	0	0	0	0	0	0	0	0	0	0	0	0	0	0	0	0	0	0	0	0	0	0
Peak6906	3L	3058906	3059461	intron	0.981324	0	0	1	0	0	0	0	0	0	0	0	0	0	0	0	0	0	0	0	0	0	0	0	0	0	0	0	0
Peak6907	3L	3059565	3061371	intron	0.410242	0	0	1	0	0	0	0	0	0	0	0	0	0	0	0	0	0	0	0	0	0	0	0	0	0	0	0	0
Peak6911	3L	3074688	3075265	intron	0.800244	0	0	1	0	0	0	0	0	0	0	0	0	0	0	0	0	0	0	1	1	0	1	0	0	0	0	0	0
Peak6913	3L	3077794	3078083	promoter	0.606577	0	0	1	0	0	0	0	0	0	0	0	0	0	0	0	0	0	0	0	0	0	0	0	0	0	0	0	0
Peak6920	3L	3092454	3092734	CDS	0.565662	0	0	1	0	0	0	0	0	0	0	0	0	0	0	0	0	0	0	0	0	0	0	0	0	0	0	0	0
Peak6924	3L	3121691	3122176	intron	0.471265	0	0	1	0	0	0	0	0	0	0	0	0	0	0	0	0	0	0	0	0	0	0	0	0	0	0	0	0
Peak6925	3L	3126465	3127010	intron	0.641221	0	0	1	0	0	0	0	0	0	0	0	0	0	0	0	0	0	0	0	0	0	0	0	0	0	0	0	0
Peak6929	3L	3148925	3149652	promoter	0.466864	0	0	1	0	0	0	0	0	0	0	0	0	0	0	0	0	0	0	0	0	0	0	0	0	0	0	0	0
Peak6940	3L	3194029	3194981	CDS	0.664991	0	0	1	0	0	0	0	0	0	0	0	0	0	0	0	0	0	0	0	0	0	0	0	0	0	0	0	0
Peak6941	3L	3196023	3196732	CDS	0.643798	0	0	1	0	0	0	0	0	0	0	0	0	0	0	0	0	0	0	0	0	0	0	0	0	0	0	0	0
Peak6954	3L	3304738	3304992	intron	0.759385	0	0	1	0	0	0	0	0	0	0	0	0	0	0	1	0	0	0	0	0	0	0	0	0	0	0	0	0
Peak6955	3L	3307573	3308233	promoter	0.541233	0	0	1	0	0	0	0	0	0	0	0	0	0	0	0	0	0	0	0	0	0	1	0	0	0	0	0	0
Peak6957	3L	3315403	3315883	promoter	0.655876	0	0	1	0	0	0	0	0	0	0	0	0	0	0	0	0	0	0	0	0	0	0	0	0	0	0	0	0
Peak6971	3L	3400682	3401106	intergenic	0.580313	0	0	1	0	0	0	0	0	0	0	0	0	0	0	0	0	0	0	0	0	0	0	0	0	0	0	0	0
Peak6981	3L	3438863	3439106	intron	1.0398	0	0	1	0	0	0	0	0	0	0	0	0	0	0	0	0	0	0	0	0	0	0	0	0	0	0	0	0
Peak6982	3L	3452360	3453276	intron	0.580707	0	0	1	0	1	0	0	0	0	1	1	0	0	1	1	1	0	0	1	1	1	1	0	0	1	0	1	0
Peak6990	3L	3544841	3545430	promoter	0.539669	0	0	1	1	0	1	0	0	0	0	0	0	0	0	0	0	0	0	0	0	0	0	0	0	1	0	0	0
Peak6993	3L	3618651	3619414	intergenic	0.532894	0	0	1	0	0	0	0	0	0	0	0	0	0	0	0	0	0	0	0	1	0	0	0	0	0	0	0	0
Peak6996	3L	3638927	3639466	intron	0.783523	0	0	1	0	0	0	0	0	0	0	0	0	0	0	0	0	0	0	0	0	0	0	0	0	0	0	0	0
Peak7002	3L	3782701	3783151	intron	0.745336	0	0	1	0	0	0	0	0	0	0	0	0	0	0	0	0	0	0	0	0	0	0	0	0	0	0	0	0
Peak7004	3L	3786113	3786545	intron	0.62977	0	0	1	0	0	0	0	0	0	0	0	0	0	0	0	0	0	0	0	0	0	0	0	0	0	0	0	0
Peak7007	3L	3791054	3791364	CDS	0.696038	0	0	1	0	0	0	0	0	0	0	0	0	0	0	0	0	0	0	0	0	0	0	0	0	0	0	0	0
Peak7012	3L	3811839	3812346	CDS	0.482144	0	0	1	0	0	0	0	0	0	0	0	0	0	0	0	0	0	0	0	1	0	0	0	0	0	0	0	0
Peak7016	3L	3824594	3824946	intron	0.618703	0	0	1	0	0	0	0	0	0	0	0	0	0	0	0	0	0	0	0	1	0	0	0	0	0	0	0	0
Peak7018	3L	3827955	3828384	intron	0.768684	0	0	1	0	0	0	0	0	0	0	0	0	0	0	0	0	0	0	0	0	0	0	0	0	0	0	0	0
Peak7021	3L	3845673	3846457	promoter	0.732823	0	0	1	0	0	0	0	0	0	0	0	0	0	0	0	0	0	0	0	1	0	0	0	0	0	0	0	0
Peak7031	3L	3976435	3976852	intergenic	0.52809	0	0	1	0	0	0	0	0	0	0	0	0	0	0	0	0	0	0	0	1	0	0	0	0	0	0	0	0
Peak7032	3L	3977561	3978028	intergenic	0.828167	0	0	1	0	0	0	0	0	0	0	0	0	0	0	0	0	0	0	0	0	0	0	0	0	0	0	0	0
Peak7035	3L	3979972	3980323	intergenic	0.930245	0	0	1	0	0	1	0	0	0	0	0	0	0	0	0	0	0	0	0	0	0	0	0	0	0	0	0	0
Peak7039	3L	4017295	4017976	intergenic	1.2895	0	0	1	0	0	0	0	0	0	0	0	0	0	0	0	0	0	0	0	0	0	0	0	0	0	0	0	0
Peak7042	3L	4040096	4041139	promoter	0.271196	0	0	1	0	0	0	0	0	0	0	0	0	0	0	0	0	0	0	0	0	0	0	0	0	0	0	0	0
Peak7043	3L	4062002	4062766	promoter	0.288405	0	0	1	0	1	1	0	0	0	1	1	1	0	0	1	1	1	0	1	1	1	0	0	0	1	0	1	1
Peak7047	3L	4097423	4097834	CDS	0.704121	0	0	1	0	1	1	0	0	0	1	1	1	0	0	1	1	1	0	1	1	1	0	0	0	1	0	1	1
Peak7048	3L	4098048	4098455	CDS	0.703357	0	0	1	0	0	0	0	0	0	0	0	0	0	0	0	0	0	0	0	0	0	0	0	0	0	0	0	0
Peak7056	3L	4136989	4137301	CDS	0.556167	0	0	1	0	0	0	0	0	0	0	1	0	0	0	1	1	0	0	1	1	0	0	0	1	0	1	1	0
Peak7059	3L	4140509	4140769	UTR	0.497292	0	0	1	1	1	0	0	0	0	1	1	0	1	0	1	1	0	0	1	1	1	1	0	0	0	0	0	0
Peak7060	3L	4146261	4146544	intergenic	0.615984	0	0	1	0	0	0	0	0	0	0	0	0	0	0	0	0	0	0	0	0	0	0	0	0	0	0	0	0
Peak7061	3L	4159273	4159697	intron	0.578544	0	0	1	0	0	0	0	0	0	0	0	0	0	0	0	0	0	0	0	0	0	0	0	0	0	0	0	0
Peak7062	3L	4160751	4161370	promoter	1.11249	0	0	1	0	0	0	0	0	0	0	0	0	0	0	0	0	0	0	0	1	0	0	0	0	0	0	0	0
Peak7065	3L	4168577	4168863	intergenic	0.954534	0	0	1	0	0	0	0	0	0	0	0	0	0	0	0	0	0	0	0	0	0	0	0	0	0	0	0	0
Peak7069	3L	4222180	4222641	CDS	0.709739	0	0	1	0	0	0	0	0	0	0	0	0	0	0	1	1	0	0	1	1	1	1	0	0	0	0	0	0
Peak7070	3L	4226741	4227703	promoter	0.331261	0	0	1	0	0	0	0	0	0	0	0	0	0	0	0	0	0	0	0	0	0	0	0	0	0	0	0	0
Peak7071	3L	4229616	4231411	intron	0.41768	0	0	1	0	0	0	0	0	0	0	0	0	0	0	0	0	0	0	1	0	0	0	0	0	0	0	0	0
Peak7073	3L	4232079	4232786	intron	0.371995	0	0	1	0	0	0	0	0	0	0	0	0	0	0	0	0	0	0	0	0	0	0	0	0	0	0	0	0
Peak7093	3L	4286927	4287163	promoter	0.409531	0	0	1	0	0	0	0	0	0	0	0	0	0	0	0	0	0	0	0	0	0	0	0	0	0	0	0	0
Peak7099	3L	4326705	4326989	intron	0.839383	0	0	1	1	0	0	0	0	0	0	0	0	0	1	1	0	0	1	0	1	0	0	1	0	0	0	0	0
Peak7116	3L	4422016	4422280	UTR	0.94382	0	0	1	0	0	0	0	0	0	0	0	0	0	0	0	0	0	0	0	1	0	0	0	0	0	0	0	0
Peak7123	3L	4548888	4549226	intron	0.790351	0	0	1	0	0	0	0	0	0	0	0	0	0	0	0	0	0	0	0	0	0	0	0	0	0	0	0	0
Peak7126	3L	4599660	4600302	intron	0.74993	0	0	1	0	0	1	0	0	0	0	0	0	0	0	0	0	0	0	0	0	0	0	0	0	0	0	0	0
Peak7127	3L	4609287	4609992	intron	0.640015	0	0	1	0	0	0	0	0	0	0	0	0	0	0	0	0	0	0	0	0	0	0	0	0	0	0	0	0
Peak7132	3L	4623152	4623469	intron	0.614307	0	0	1	0	0	0	0	0	0	1	1	0	1	0	0	0	0	1	1	1	0	1	0	0	0	0	0	0
Peak7137	3L	4634624	4634996	promoter	1.53649	0	0	1	0	0	0	0	0	0	0	0	0	0	0	0	0	0	0	0	0	0	0	0	0	0	0	0	0
Peak7138	3L	4643536	4643854	CDS	2.10522	0	0	1	0	1	0	0	0	0	0	0	0	0	0	0	0	0	0	1	1	0	0	0	0	0	0	0	0
Peak7139	3L	4645655	4646120	CDS	1.98731	0	0	1	0	0	0	0	0	0	0	1	0	0	0	0	0	0	0	0	1	0	0	0	0	0	0	1	0
Peak7140	3L	4668557	4668909	intron	1.89893	0	0	1	0	1	0	0	0	0	0	0	0	0	0	1	1	0	0	1	1	0	0	0	0	0	0	1	0
Peak7141	3L	4677245	4678055	promoter	0.915316	0	0	1	0	0	0	0	0	1	0	0	0	0	0	0	0	0	0	1	1	0	1	0	0	0	0	0	0
Peak7142	3L	4679671	4680148	intron	1.2632	0	0	1	0	0	0	0	0	0	0	0	0	0	0	0	0	0	0	0	0	0	0	0	0	0	0	0	0
Peak7144	3L	4694388	4695223	promoter	0.614912	0	0	1	0	0	0	0	0	1	0	0	0	0	0	0	0	0	0	0	0	0	0	0	0	0	0	0	0
Peak7145	3L	4696215	4697886	promoter	0.946033	0	0	1	0	0	0	0	0	1	0	0	0	0	0	0	0	0	0	0	1	1	1	0	0	0	0	0	0
Peak7147	3L	4709518	4710262	promoter	1.43253	0	0	1	0	0	0	0	0	0	0	0	0	0	0	0	0	0	0	0	0	0	0	0	0	0	0	0	0
Peak7152	3L	4842654	4842952	intergenic	0.683954	0	0	1	0	0	0	0	0	0	0	1	0	0	0	1	1	0	1	1	1	0	1	0	0	0	0	0	0
Peak7157	3L	5127173	5127393	promoter	0.658534	0	0	1	0	0	0	0	0	0	0	0	0	0	1	0	0	0	1	0	0	0	0	0	0	0	0	0	0
Peak7158	3L	5128352	5129582	promoter	0.61378	0	0	1	0	0	0	0	0	0	0	0	0	0	0	0	0	0	0	0	0	0	0	0	0	0	0	0	0
Peak7159	3L	5132377	5132840	promoter	0.48181	0	0	1	0	0	1	0	0	0	0	0	0	0	0	0	0	0	0	0	0	0	0	0	0	0	0	0	0
Peak7163	3L	5179808	5180587	intron	0.618226	0	0	1	0	0	0	0	0	1	0	0	0	0	1	0	0	0	0	1	1	1	1	0	0	0	0	0	0
Peak7180	3L	5584458	5585756	promoter	0.572006	0	0	1	0	0	0	0	0	0	0	0	0	0	0	0	0	0	0	0	0	0	0	0	0	0	0	0	0
Peak7188	3L	5609515	5609983	intergenic	0.438403	0	0	1	0	0	0	0	0	0	0	1	0	0	0	0	1	0	0	1	1	0	0	0	0	0	0	1	0
Peak7189	3L	5613778	5615049	intergenic	1.56448	0	0	1	1	0	1	1	0	0	1	0	1	1	0	1	1	1	1	1	1	1	1	0	0	0	0	0	0
Peak7190	3L	5616175	5617003	intergenic	2.06667	0	0	1	0	0	1	0	0	0	1	0	0	1	0	1	0	1	1	1	0	0	1	0	0	0	0	0	0
Peak7191	3L	5617709	5617934	intergenic	1.24816	0	0	1	0	0	0	0	0	0	0	0	0	0	0	0	0	0	0	0	0	0	0	0	0	0	0	0	0
Peak7194	3L	5626235	5626703	intron	0.787231	0	0	1	0	0	0	0	0	0	0	0	0	0	0	0	0	0	0	0	1	0	0	0	0	0	0	0	0
Peak7196	3L	5628733	5629162	promoter	0.948327	0	0	1	0	0	0	0	0	0	0	0	0	0	0	0	0	0	0	0	0	0	0	0	0	0	0	0	0
Peak7197	3L	5629763	5630638	intron	1.00118	0	0	1	0	0	1	0	0	0	0	0	0	0	0	0	0	0	0	0	1	0	0	0	0	0	0	1	0
Peak7198	3L	5630844	5631630	intron	0.800795	0	0	1	0	0	0	0	0	0	0	0	0	0	0	0	0	0	0	1	0	0	1	0	0	0	0	0	0
Peak7199	3L	5641605	5641848	CDS	1.70291	0	0	1	0	0	0	0	0	0	0	0	0	0	0	0	0	0	0	0	0	0	0	0	0	0	0	0	0
Peak7200	3L	5644194	5644495	intergenic	1.32634	0	0	1	0	0	0	0	0	0	0	0	0	0	0	0	0	0	0	0	0	0	0	0	0	0	0	0	0
Peak7201	3L	5645836	5646240	intergenic	0.671785	0	0	1	0	0	0	0	0	0	0	0	0	0	0	0	0	0	0	0	0	0	1	0	0	0	0	0	0
Peak7204	3L	5648441	5649179	intron	0.755993	0	0	1	0	0	0	0	0	0	0	0	0	0	0	0	0	0	0	0	0	0	0	0	0	0	0	0	0
Peak7208	3L	5656983	5657333	intron	1.09187	0	0	1	0	0	1	0	0	0	0	0	0	0	0	0	0	0	0	0	0	0	0	0	0	0	0	0	0
Peak7209	3L	5657477	5658104	intron	0.750908	0	0	1	0	0	0	0	0	0	0	0	0	0	0	0	0	0	0	0	0	0	0	0	0	0	0	0	0
Peak7210	3L	5658368	5659068	intron	0.543813	0	0	1	0	0	0	0	0	0	0	0	0	0	0	0	0	0	0	0	0	0	0	0	0	0	0	0	0
Peak7211	3L	5659595	5659880	intron	0.988193	0	0	1	0	0	0	0	0	0	0	0	0	0	0	0	0	0	0	1	0	0	1	0	0	0	0	0	0
Peak7214	3L	5684275	5684586	promoter	0.851246	0	0	1	0	0	0	0	0	0	0	0	0	0	0	0	0	0	0	0	0	0	0	0	0	0	0	0	0
Peak7215	3L	5685941	5686244	intron	1.09845	0	0	1	0	0	0	0	0	0	0	0	0	0	0	0	0	0	0	0	1	0	0	1	0	0	0	1	0
Peak7216	3L	5693332	5693563	intron	1.44767	0	0	1	0	0	0	0	0	0	0	0	0	1	0	1	0	1	1	1	0	0	1	0	0	0	0	0	0
Peak7217	3L	5696253	5696821	intron	0.85489	0	0	1	0	1	0	0	0	0	0	1	0	0	1	0	0	0	0	1	1	0	0	0	0	0	0	0	0
Peak7219	3L	5713601	5713812	intron	1.45226	0	0	1	0	0	0	0	0	0	0	0	0	0	0	0	0	0	0	0	0	0	0	0	0	0	0	0	0
Peak7222	3L	5753948	5754831	CDS	0.560024	0	0	1	0	0	0	0	0	0	0	0	0	0	0	0	0	0	0	0	0	0	0	0	0	0	0	0	0
Peak7239	3L	5796086	5796597	promoter	0.949259	0	0	1	0	0	0	0	0	0	0	0	0	0	0	0	0	0	0	0	1	0	0	0	0	0	0	0	0
Peak7240	3L	5799168	5801300	CDS	0.697247	0	0	1	0	0	0	0	0	0	0	0	0	0	0	0	0	0	0	0	0	0	0	0	0	0	0	0	0
Peak7246	3L	5820185	5820408	intron	0.793842	0	0	1	0	0	0	0	0	0	1	0	0	0	0	1	0	0	0	1	1	0	1	0	0	0	0	0	0
Peak7252	3L	5834756	5835050	intron	0.774404	0	0	1	0	0	0	0	0	0	0	0	0	0	0	0	0	0	0	1	1	0	0	0	0	0	0	0	0
Peak7256	3L	5841595	5841993	intergenic	0.586516	0	0	1	0	0	0	0	0	0	0	0	0	0	0	0	0	0	0	0	0	0	0	0	0	0	0	0	0
Peak7257	3L	5849097	5850719	intergenic	0.544508	0	0	1	0	0	0	0	0	0	0	0	0	0	0	0	0	0	0	0	0	0	0	0	0	0	0	0	0
Peak7259	3L	5852318	5852571	intergenic	0.89565	0	0	1	0	0	0	0	0	0	0	0	0	0	0	0	0	0	0	0	0	0	0	0	0	0	0	0	0
Peak7267	3L	5888352	5888645	intergenic	1.07265	0	0	1	0	0	0	0	0	0	0	0	0	0	1	0	0	0	0	0	0	0	0	0	0	0	0	0	0
Peak7271	3L	5922010	5923242	CDS	0.395728	0	0	1	0	0	0	0	0	0	0	0	0	0	0	0	0	0	0	0	0	0	0	0	0	0	0	0	0
Peak7275	3L	5943609	5944035	promoter	0.627568	0	0	1	0	0	0	0	0	0	0	0	0	0	0	0	0	0	0	0	0	0	0	0	0	0	0	0	0
Peak7278	3L	5957384	5957616	intergenic	0.620194	0	0	1	0	0	0	0	0	0	0	0	0	0	0	0	0	0	0	0	0	0	0	0	0	0	0	0	0
Peak7279	3L	5960306	5960649	UTR	0.632819	0	0	1	0	0	0	0	0	0	0	0	0	0	0	0	0	0	0	0	0	0	0	0	0	0	0	0	0
Peak7280	3L	5961019	5961284	CDS	0.73635	0	0	1	0	0	0	0	0	0	0	0	0	0	0	0	0	0	0	0	0	0	0	0	0	0	0	0	0
Peak7281	3L	5961916	5962637	CDS	0.879904	0	0	1	0	0	0	0	0	0	0	0	0	0	1	0	0	0	0	1	1	1	1	0	0	0	0	0	0
Peak7282	3L	5962810	5963173	intron	0.693168	0	0	1	0	0	0	0	0	0	0	0	0	0	0	0	0	0	0	0	0	0	1	0	0	0	0	0	0
Peak7283	3L	5963566	5964318	intron	0.657717	0	0	1	0	0	0	0	0	0	0	0	0	0	0	0	0	0	0	0	0	0	0	0	0	0	0	0	0
Peak7285	3L	5966844	5967895	intron	1.02744	0	0	1	0	0	0	0	0	0	0	0	0	0	0	0	0	0	0	0	0	0	0	0	0	0	0	0	0
Peak7288	3L	5974927	5975353	intergenic	0.783567	0	0	1	0	0	0	0	0	0	0	0	0	0	0	0	0	0	0	0	0	0	0	0	0	0	0	0	0
Peak7289	3L	5975667	5977024	intergenic	0.797638	0	0	1	0	0	0	0	0	0	0	0	0	0	0	0	0	0	0	1	1	0	1	0	0	0	0	0	0
Peak7290	3L	5985974	5986438	intergenic	0.506918	0	0	1	0	0	0	0	0	0	0	0	0	0	0	0	0	0	0	0	0	0	0	0	0	0	0	0	0
Peak7291	3L	5986837	5987351	intergenic	0.824453	0	0	1	0	0	0	0	0	0	0	0	0	0	0	0	0	0	0	1	0	0	0	0	0	0	0	0	0
Peak7292	3L	5987426	5987936	intergenic	0.749778	0	0	1	0	0	0	0	0	0	0	0	0	0	0	0	0	0	0	0	0	0	0	0	0	0	0	0	0
Peak7293	3L	5989493	5989994	intergenic	1.671	0	0	1	0	0	0	0	0	0	0	0	0	0	0	1	0	0	0	0	0	0	0	0	0	0	0	0	0
Peak7296	3L	6061128	6061706	intron	1.07559	0	0	1	0	0	0	0	0	0	0	0	0	0	0	0	0	0	0	0	0	0	0	0	0	0	0	0	0
Peak7301	3L	6087942	6088212	promoter	0.386134	0	0	1	0	0	0	0	0	0	0	0	0	0	0	0	0	0	0	0	0	0	0	0	0	0	0	0	0
Peak7302	3L	6097665	6098132	intron	0.61724	0	0	1	1	0	0	0	0	0	0	0	0	0	0	0	0	0	0	0	0	0	0	0	0	0	0	0	0
Peak7308	3L	6169115	6169467	CDS	0.700832	0	0	1	0	0	0	0	0	0	0	0	0	0	0	0	0	0	0	0	0	0	0	0	0	0	0	0	0
Peak7314	3L	6209784	6210367	CDS	1.05708	0	0	1	0	0	0	0	0	0	0	0	0	0	0	0	0	0	0	1	1	0	0	0	0	0	0	0	0
Peak7315	3L	6210882	6211404	promoter	0.498819	0	0	1	0	0	1	1	0	0	0	0	0	0	0	0	0	1	1	0	1	0	0	0	0	0	0	1	0
Peak7316	3L	6211590	6212070	intergenic	0.668625	0	0	1	0	0	0	0	0	0	0	0	0	0	0	0	0	0	0	0	0	0	0	0	0	0	0	0	0
Peak7321	3L	6332071	6332406	intron	0.981698	0	0	1	0	0	0	0	0	0	0	0	0	0	1	1	0	1	1	0	0	0	0	0	0	0	0	0	0
Peak7323	3L	6345426	6345729	promoter	0.569911	0	0	1	0	0	0	0	0	0	0	0	0	0	0	0	0	0	0	0	0	0	0	0	0	0	0	0	0
Peak7326	3L	6449887	6450149	intron	0.877198	0	0	1	0	0	0	0	0	0	0	0	0	0	0	0	0	0	0	0	0	0	0	0	0	0	0	0	0
Peak7327	3L	6450520	6450783	intron	1.75839	0	0	1	0	0	0	0	0	0	0	0	0	0	0	0	0	0	0	0	0	0	0	0	0	0	0	0	0
Peak7334	3L	6488578	6490161	promoter	0.307735	0	0	1	0	0	0	0	0	0	0	0	0	0	0	0	0	0	0	1	0	0	1	0	0	0	0	0	0
Peak7337	3L	6491875	6492347	intron	0.632953	0	0	1	1	0	0	0	0	0	0	0	0	0	0	0	0	0	0	0	0	0	0	0	0	0	0	0	0
Peak7339	3L	6493328	6494010	intron	1.4345	0	0	1	0	0	0	0	0	0	0	0	0	0	0	0	0	0	0	0	0	0	0	0	0	0	0	0	0
Peak7342	3L	6496721	6497185	intron	0.800066	0	0	1	0	0	0	0	0	0	0	0	0	0	0	0	0	0	0	1	1	0	1	0	0	0	0	0	0
Peak7347	3L	6506509	6507214	intron	0.550866	0	0	1	0	0	0	0	0	0	0	0	0	0	0	0	0	0	0	0	1	0	0	0	0	0	0	1	0
Peak7367	3L	6746104	6746686	promoter	1.02724	0	0	1	0	0	0	1	0	0	0	0	0	1	0	1	0	1	1	1	0	1	1	0	0	1	1	1	0
Peak7369	3L	6757552	6758216	intergenic	0.605389	0	0	1	0	1	0	1	0	0	1	1	0	1	0	0	1	0	1	0	1	0	0	0	1	1	1	1	0
Peak7371	3L	6761454	6761653	intergenic	3.06577	0	0	1	0	0	0	0	0	0	0	0	0	0	0	0	0	0	0	0	0	0	0	0	0	0	0	0	0
Peak7377	3L	6824685	6825426	intergenic	1.1561	0	0	1	0	0	0	0	0	0	0	0	0	0	0	0	0	0	0	0	0	0	0	0	0	0	0	0	0
Peak7378	3L	6827446	6827749	intergenic	0.900397	0	0	1	0	0	0	0	0	0	1	1	1	1	0	0	0	0	0	1	1	0	1	0	0	0	0	0	0
Peak7379	3L	6838726	6839443	intergenic	0.890434	0	0	1	0	0	0	0	0	0	0	0	0	0	0	0	0	0	0	1	0	0	0	0	0	0	0	0	0
Peak7386	3L	6962050	6962268	promoter	0.463512	0	0	1	0	0	0	0	0	0	1	0	0	0	0	0	0	0	0	1	0	0	0	0	0	0	0	0	0
Peak7391	3L	7024172	7024432	intron	0.966459	0	0	1	0	0	0	0	0	0	1	0	0	0	0	1	0	1	1	1	0	1	1	0	0	0	0	0	0
Peak7392	3L	7026292	7026559	intron	1.2254	0	0	1	0	0	0	0	0	0	1	0	0	1	0	1	0	0	0	1	0	0	1	0	0	0	0	0	0
Peak7393	3L	7028727	7029035	CDS	1.35143	0	0	1	0	0	1	0	0	0	0	0	0	0	0	1	0	1	0	1	0	1	1	0	0	0	0	0	0
Peak7394	3L	7087758	7088034	promoter	0.408438	0	0	1	0	0	0	0	0	0	1	0	0	0	0	1	0	1	0	1	0	1	1	0	0	0	0	0	0
Peak7400	3L	7130595	7131920	intron	0.714208	0	0	1	0	0	0	0	0	0	1	0	0	0	0	0	0	0	0	1	0	0	0	0	0	0	0	0	0
Peak7409	3L	7178652	7178853	intron	1.19982	0	0	1	0	0	0	0	0	0	1	1	0	0	0	1	0	0	0	1	1	1	1	0	0	0	0	0	0
Peak7410	3L	7182689	7183166	promoter	0.879046	0	0	1	0	0	0	0	0	0	0	0	0	0	0	0	0	0	0	1	1	0	0	0	0	1	0	1	0
Peak7415	3L	7236896	7237206	promoter	0.345784	0	0	1	0	0	0	0	0	0	0	0	0	0	0	1	0	0	0	0	0	0	0	1	0	0	0	0	0
Peak7425	3L	7337994	7338912	promoter	0.462225	0	0	1	0	0	0	0	0	0	0	0	0	0	0	0	0	0	0	0	0	0	0	0	0	0	0	0	0
Peak7439	3L	7408983	7409285	intergenic	0.976926	0	0	1	0	0	1	0	0	0	1	0	0	0	0	0	0	0	0	1	1	1	1	0	0	0	0	0	0
Peak7440	3L	7412620	7412892	intergenic	1.09515	0	0	1	0	0	0	0	0	0	0	0	0	0	0	0	0	0	0	0	1	0	0	0	0	0	0	0	0
Peak7443	3L	7429915	7430404	CDS	0.653758	0	0	1	0	0	0	0	0	0	0	0	0	0	0	0	0	0	0	0	0	0	0	0	0	0	0	0	0
Peak7446	3L	7511844	7512792	promoter	0.472557	0	0	1	0	0	1	0	0	0	0	0	0	1	0	0	0	0	0	0	1	0	0	0	0	0	0	1	0
Peak7450	3L	7634584	7634898	promoter	0.425635	0	0	1	0	0	1	0	0	0	0	0	0	0	0	0	0	0	0	0	0	0	0	0	0	0	0	0	0
Peak7464	3L	7888054	7889063	CDS	0.361615	0	0	1	0	0	0	0	0	0	1	1	0	0	0	1	1	0	0	1	1	0	0	0	0	0	0	0	0
Peak7465	3L	7889273	7892197	CDS	0.326196	0	0	1	0	0	0	0	0	0	0	0	0	0	0	0	0	0	0	0	0	0	0	0	0	0	0	0	0
Peak7466	3L	7893164	7895888	CDS	0.338441	0	0	1	0	0	0	0	0	0	0	0	0	0	0	0	0	0	0	0	0	0	0	0	0	0	0	0	0
Peak7471	3L	7901974	7902995	promoter	0.344969	0	0	1	0	0	0	0	0	0	0	0	0	0	0	0	0	0	0	0	0	0	1	0	0	0	0	0	0
Peak7476	3L	7924697	7925060	intron	0.810763	0	0	1	0	0	0	0	0	0	0	0	0	0	0	0	0	0	0	0	0	0	0	0	0	0	0	0	0
Peak7489	3L	7974423	7974877	intron	0.912867	0	0	1	0	0	0	0	0	0	0	0	0	0	0	0	0	0	0	0	0	0	0	0	0	0	0	0	0
Peak7500	3L	7990364	7990787	intron	0.643899	0	0	1	1	0	0	0	0	0	0	0	0	0	0	0	0	0	0	0	0	0	1	0	0	1	0	0	0
Peak7528	3L	8030944	8031273	intron	0.720056	0	0	1	0	0	1	0	0	0	0	0	0	0	0	0	0	0	0	0	0	0	0	0	0	0	0	0	0
Peak7544	3L	8072616	8073123	CDS	0.797025	0	0	1	0	0	0	0	0	0	0	0	0	0	0	0	0	0	0	0	0	0	0	0	0	0	0	0	0
Peak7545	3L	8076873	8077331	intron	1.0804	0	0	1	0	0	0	0	0	0	0	0	0	0	0	0	0	0	0	0	1	0	0	0	0	0	0	1	0
Peak7550	3L	8117418	8118047	promoter	0.424569	0	0	1	0	0	0	0	0	0	0	0	0	0	0	0	0	0	0	0	1	0	0	0	0	0	0	0	0
Peak7553	3L	8146684	8147131	intergenic	0.759122	0	0	1	0	0	0	0	0	0	1	1	0	1	0	1	1	0	0	1	1	0	0	0	0	0	0	0	0
Peak7563	3L	8186348	8186566	CDS	1.27001	0	0	1	0	0	0	0	0	0	0	0	0	0	0	0	0	0	0	0	0	0	0	0	0	0	0	0	0
Peak7564	3L	8186695	8186944	CDS	0.678185	0	0	1	0	0	0	0	0	0	0	0	0	0	0	0	0	0	0	0	0	0	0	0	0	0	0	0	0
Peak7566	3L	8189692	8190029	CDS	0.61482	0	0	1	0	0	0	0	0	0	0	0	0	0	0	0	0	0	0	0	0	0	0	0	0	0	0	0	0
Peak7569	3L	8292337	8292718	UTR	0.363381	0	0	1	0	0	0	0	0	0	0	0	0	0	0	0	0	0	0	0	0	0	0	0	0	0	0	0	0
Peak7571	3L	8298579	8298910	CDS	0.556495	0	0	1	0	0	0	0	0	0	0	0	0	0	0	0	0	0	0	0	0	0	0	0	0	0	0	0	0
Peak7574	3L	8304713	8305195	CDS	0.632475	0	0	1	0	0	0	0	0	0	0	0	0	0	0	0	0	0	0	0	0	0	0	0	0	0	0	0	0
Peak7578	3L	8333307	8333727	promoter	0.456064	0	0	1	0	0	1	0	0	0	1	1	1	1	0	1	1	1	1	1	1	1	1	0	0	0	0	0	0
Peak7579	3L	8336267	8336832	CDS	1.41291	0	0	1	0	0	0	0	0	0	0	0	0	0	0	0	0	0	0	0	0	0	0	0	0	0	0	0	0
Peak7584	3L	8388863	8389772	promoter	0.394501	0	0	1	0	0	0	0	0	0	0	0	0	0	0	0	0	0	0	0	1	0	0	0	0	0	0	0	0
Peak7593	3L	8442814	8443611	promoter	0.32092	0	0	1	0	1	1	0	0	0	1	1	0	0	1	0	1	1	0	1	1	0	0	0	1	1	1	1	0
Peak7595	3L	8444668	8445422	intron	0.42113	0	0	1	0	0	0	0	0	0	0	0	0	0	0	0	0	0	0	0	1	0	0	0	0	0	0	1	0
Peak7596	3L	8445862	8446297	intron	1.35173	0	0	1	1	1	0	0	0	0	1	1	0	0	0	1	1	0	0	1	1	0	0	0	1	1	1	1	0
Peak7600	3L	8449156	8450055	intron	0.663034	0	0	1	0	0	0	0	0	0	0	0	0	0	0	0	0	0	0	0	0	0	0	0	0	0	0	0	0
Peak7606	3L	8455846	8456112	intron	1.10363	0	0	1	0	0	0	0	0	0	0	0	0	0	0	0	0	0	0	0	0	0	0	0	0	0	0	0	0
Peak7607	3L	8458512	8458771	CDS	0.657171	0	0	1	0	0	0	0	0	0	0	0	0	0	0	0	0	0	0	0	0	0	0	0	0	0	0	0	0
Peak7610	3L	8474073	8474931	intron	0.625466	0	0	1	0	0	0	0	0	0	0	0	0	0	0	0	0	0	0	0	0	0	0	0	0	0	0	0	0
Peak7618	3L	8505391	8505970	promoter	0.258819	0	0	1	0	0	0	0	0	0	0	0	0	0	0	0	0	0	0	0	0	0	0	0	0	0	0	0	0
Peak7622	3L	8519843	8520734	intron	0.519264	0	0	1	0	0	0	0	0	0	0	0	0	0	0	0	0	0	0	0	1	0	0	0	0	0	0	0	0
Peak7630	3L	8547095	8547494	intron	1.21065	0	0	1	0	0	0	0	0	0	0	0	0	0	0	0	0	0	0	0	0	0	0	0	0	0	0	0	0
Peak7633	3L	8552961	8553353	promoter	0.907306	0	0	1	0	0	0	0	0	0	0	0	0	0	0	0	0	0	0	0	0	0	0	0	0	0	0	0	0
Peak7643	3L	8637050	8637876	intergenic	1.63565	0	0	1	0	1	0	0	0	0	0	1	0	0	0	0	0	0	0	1	1	0	0	0	0	0	0	0	0
Peak7644	3L	8645988	8647163	intergenic	1.08726	0	0	1	0	0	0	0	0	0	0	0	0	0	0	0	0	0	0	0	0	0	0	0	0	0	0	0	0
Peak7645	3L	8653632	8654402	intergenic	1.76378	0	0	1	1	1	1	0	0	0	0	0	0	0	0	1	0	0	0	0	0	0	0	0	0	0	0	0	0
Peak7646	3L	8655852	8656037	intergenic	0.847394	0	0	1	0	0	0	0	0	0	0	0	0	0	0	0	0	0	0	0	0	0	0	0	0	0	0	0	0
Peak7647	3L	8657394	8658056	intergenic	2.33031	0	0	1	0	0	0	0	0	0	0	0	0	0	0	0	0	0	0	0	1	0	0	0	0	0	0	0	0
Peak7648	3L	8658460	8660140	intergenic	1.74484	0	0	1	0	0	0	0	0	0	0	0	0	0	0	0	0	0	0	0	1	0	0	0	0	0	0	0	0
Peak7649	3L	8663032	8663790	intergenic	0.909102	0	0	1	0	0	0	0	0	0	0	0	0	0	0	0	0	0	0	0	0	0	0	0	0	0	0	0	0
Peak7650	3L	8663847	8664922	intergenic	1.60542	0	0	1	0	0	0	0	0	0	0	0	0	0	0	0	0	0	0	0	0	0	0	0	0	0	0	0	0
Peak7653	3L	8674128	8674564	intergenic	1.3191	0	0	1	0	0	0	0	0	0	0	0	0	0	0	0	0	0	0	0	0	0	0	0	0	0	0	0	0
Peak7661	3L	8817666	8818003	intergenic	0.552757	0	0	1	0	0	1	0	0	0	0	0	0	0	0	0	0	0	0	0	0	0	0	0	0	0	0	0	0
Peak7663	3L	8819151	8819743	intergenic	0.732665	0	0	1	0	0	0	0	0	0	0	0	0	0	0	0	0	0	0	0	0	0	0	0	0	0	0	0	0
Peak7668	3L	8825443	8826984	intron	0.348382	0	0	1	0	0	0	0	0	0	0	0	0	0	0	0	0	0	0	0	1	0	0	0	0	0	0	0	0
Peak7669	3L	8828156	8828410	intron	0.389264	0	0	1	0	0	0	0	0	0	0	0	0	0	0	0	0	0	0	1	1	0	0	0	0	0	0	0	0
Peak7670	3L	8843668	8844307	intron	0.737465	0	0	1	0	0	0	0	0	0	0	0	0	0	0	0	0	0	0	0	0	0	1	0	0	0	0	0	0
Peak7671	3L	8844427	8844644	intron	0.614074	0	0	1	0	0	0	0	0	0	0	0	0	0	0	0	0	0	0	0	0	0	0	0	0	0	0	0	0
Peak7673	3L	8858240	8858545	intron	0.583817	0	0	1	0	0	0	0	0	0	0	1	0	0	0	0	1	0	0	1	1	0	1	0	0	0	0	0	0
Peak7683	3L	8995542	8996131	UTR	0.47849	0	0	1	0	0	0	0	0	0	0	0	0	0	0	0	0	0	0	0	0	0	0	0	0	0	0	0	0
Peak7684	3L	8996320	8997067	intergenic	0.592493	0	0	1	0	0	0	0	0	0	0	0	0	0	0	0	0	0	0	0	0	0	0	0	0	0	0	0	0
Peak7687	3L	9003375	9004187	intergenic	1.54997	0	0	1	0	0	0	0	0	0	0	0	0	0	0	0	0	0	0	0	0	0	0	0	0	1	0	0	0
Peak7688	3L	9005110	9005693	intergenic	0.891309	0	0	1	0	0	0	0	0	0	0	0	0	0	0	0	0	0	0	0	0	0	0	0	0	0	0	0	0
Peak7689	3L	9006887	9007334	intron	0.823251	0	0	1	0	0	0	0	0	0	0	0	0	0	0	0	0	0	0	0	0	0	0	0	0	0	0	0	0
Peak7695	3L	9022040	9023237	intergenic	0.880943	0	0	1	0	1	0	0	0	0	0	0	0	0	0	0	0	0	0	1	1	0	0	0	0	0	0	1	0
Peak7696	3L	9023970	9024418	intergenic	0.979141	0	0	1	0	0	0	0	0	0	0	0	0	0	0	0	0	0	0	0	0	0	0	0	0	0	0	0	0
Peak7697	3L	9027982	9028255	intergenic	1.7751	0	0	1	0	0	0	0	0	0	0	0	0	0	0	0	0	0	0	0	0	0	0	0	0	0	0	0	0
Peak7699	3L	9032017	9032715	intergenic	0.580407	0	0	1	0	0	0	0	0	0	0	0	0	0	0	0	0	0	0	0	0	0	0	0	0	0	0	0	0
Peak7702	3L	9036103	9037207	CDS	0.560833	0	0	1	0	1	0	0	0	0	0	1	0	0	0	0	1	0	0	1	1	0	0	0	0	0	0	1	0
Peak7712	3L	9122403	9123195	intron	0.392919	0	0	1	0	0	0	0	0	0	0	0	0	0	0	0	0	0	0	0	1	0	0	0	0	0	0	0	0
Peak7718	3L	9157753	9158067	intron	1.09056	0	0	1	1	0	1	0	0	0	0	0	0	0	0	0	0	0	0	0	0	0	0	0	0	0	0	0	0
Peak7719	3L	9242865	9243115	intergenic	0.685832	0	0	1	1	1	0	0	0	0	0	0	0	0	0	0	0	0	0	0	0	0	0	0	0	0	0	0	0
Peak7721	3L	9323199	9323530	intergenic	0.641424	0	0	1	0	0	0	0	0	0	0	1	0	0	0	0	1	0	0	0	1	0	0	0	0	0	0	0	0
Peak7727	3L	9360973	9363092	CDS	0.478144	0	0	1	0	0	0	1	0	0	0	0	0	1	0	0	0	0	1	0	1	0	0	0	0	1	0	1	0
Peak7763	3L	9464266	9464815	CDS	0.512063	0	0	1	0	0	0	0	0	0	0	0	0	0	0	0	0	0	0	0	0	0	0	0	0	0	0	0	0
Peak7768	3L	9478201	9478841	CDS	0.844316	0	0	1	0	0	0	0	0	0	0	0	0	0	0	0	0	0	0	0	0	0	0	0	0	0	0	0	0
Peak7771	3L	9483394	9483727	CDS	0.545871	0	0	1	0	0	1	0	0	0	0	1	0	0	0	0	0	0	0	1	1	0	0	0	0	0	0	1	0
Peak7772	3L	9484345	9485258	CDS	0.727963	0	0	1	0	0	0	0	0	0	0	0	0	0	0	0	0	0	0	1	1	0	1	0	0	0	0	0	0
Peak7773	3L	9487070	9487518	intergenic	0.903636	0	0	1	0	0	0	0	0	0	0	0	0	0	0	0	0	0	0	1	1	0	0	0	0	0	0	0	0
Peak7776	3L	9496719	9497119	intron	0.704348	0	0	1	0	0	0	0	0	0	0	0	0	0	0	0	0	0	0	0	1	0	0	0	0	0	0	0	0
Peak7777	3L	9497177	9497466	intron	0.623781	0	0	1	0	0	0	0	0	0	0	0	0	0	0	0	0	0	0	0	0	0	0	0	0	0	0	0	0
Peak7780	3L	9502094	9502870	promoter	0.516786	0	0	1	0	0	0	0	0	0	0	0	0	0	0	0	0	0	0	0	1	0	0	0	0	0	0	0	0
Peak7781	3L	9503052	9503515	CDS	0.305961	0	0	1	0	0	0	0	0	0	0	0	0	0	0	0	0	0	0	0	0	0	0	0	0	0	0	0	0
Peak7782	3L	9503602	9503768	CDS	0.488657	0	0	1	0	0	0	0	0	0	0	0	0	0	0	0	0	0	0	0	0	0	0	0	0	0	0	0	0
Peak7785	3L	9623048	9623655	promoter	0.450694	0	0	1	0	1	1	0	0	0	0	1	0	0	0	1	1	1	0	1	1	1	1	0	0	0	0	0	0
Peak7787	3L	9671304	9671769	intron	0.918525	0	0	1	0	0	0	0	0	0	0	0	0	0	0	0	0	0	0	0	0	0	0	0	0	0	0	0	0
Peak7791	3L	9737487	9737834	intron	0.738155	0	0	1	0	0	0	0	0	0	0	1	0	0	0	0	0	0	0	0	1	0	0	0	0	0	0	1	0
Peak7792	3L	9776987	9777631	CDS	0.615372	0	0	1	1	1	0	0	0	0	0	0	0	0	0	1	0	0	0	0	0	0	0	0	0	1	0	0	0
Peak7793	3L	9797082	9797638	promoter	0.625463	0	0	1	0	0	0	0	0	0	0	0	0	0	1	0	0	0	0	0	0	0	0	0	0	0	0	0	0
Peak7796	3L	9830241	9830699	CDS	0.575145	0	0	1	0	0	0	0	0	0	0	0	0	0	0	0	0	0	0	1	1	0	1	0	0	0	0	0	0
Peak7800	3L	9846271	9846476	intron	0.883954	0	0	1	0	0	0	0	0	0	0	0	0	0	0	0	0	0	0	0	0	0	0	0	0	0	0	0	0
Peak7807	3L	9880025	9880761	CDS	0.615832	0	0	1	0	0	0	0	0	0	0	0	0	0	1	1	0	0	0	0	1	0	0	1	0	0	0	0	0
Peak7809	3L	9891553	9892722	promoter	0.286096	0	0	1	0	0	0	0	0	0	0	0	0	1	0	0	0	0	0	0	0	0	1	0	0	0	0	0	0
Peak7810	3L	9898159	9898538	intergenic	0.891637	0	0	1	0	0	0	0	0	0	0	0	0	0	0	0	0	0	0	0	0	0	0	0	0	0	0	0	0
Peak7811	3L	9903117	9903316	intron	1.2043	0	0	1	0	0	0	0	0	0	0	0	0	0	0	0	1	0	0	1	1	0	0	0	0	1	0	1	0
Peak7817	3L	10182238	10182471	intergenic	0.675661	0	0	1	0	0	0	0	0	0	0	0	0	0	0	0	0	0	0	0	0	0	0	0	0	0	0	0	0
Peak7818	3L	10219122	10219615	intergenic	0.905702	0	0	1	0	0	1	0	0	0	0	0	0	0	0	0	0	0	0	0	0	0	0	0	0	0	0	0	0
Peak7819	3L	10222224	10222508	intergenic	1.91417	0	0	1	0	0	0	0	0	0	0	0	0	0	0	0	0	0	0	1	1	0	0	0	0	0	0	0	0
Peak7821	3L	10279506	10279736	intergenic	0.721725	0	0	1	0	0	1	0	0	0	0	0	0	0	0	0	0	0	0	0	1	0	0	1	0	0	0	0	0
Peak7822	3L	10281262	10281780	intergenic	0.531367	0	0	1	0	0	0	0	0	0	0	0	0	0	0	0	0	0	0	0	0	0	0	0	0	0	0	0	0
Peak7824	3L	10283694	10284123	intergenic	0.857842	0	0	1	0	0	0	0	0	0	0	0	0	0	0	0	0	0	0	0	0	0	0	0	0	0	0	0	0
Peak7825	3L	10289602	10290031	intergenic	1.06112	0	0	1	0	0	0	0	0	0	0	0	0	0	0	0	0	0	0	0	0	0	0	0	0	0	0	0	0
Peak7827	3L	10299585	10299798	intergenic	0.425036	0	0	1	0	0	0	0	0	0	0	0	0	0	0	0	0	0	0	0	0	0	0	0	0	0	0	0	0
Peak7828	3L	10301090	10301749	intergenic	0.8941	0	0	1	0	0	0	0	0	0	0	0	0	0	0	0	0	0	0	0	0	0	0	0	0	0	0	0	0
Peak7829	3L	10306230	10306835	intergenic	0.764632	0	0	1	0	0	0	0	0	0	0	0	0	0	0	0	0	0	0	0	0	0	0	0	0	0	0	0	0
Peak7830	3L	10315050	10315296	intergenic	1.19448	0	0	1	0	0	0	0	0	0	0	0	0	0	0	0	0	0	0	0	0	0	0	0	0	0	0	0	0
Peak7832	3L	10318798	10319027	intergenic	1.14154	0	0	1	0	0	0	0	0	0	0	0	0	0	0	0	0	0	0	0	0	0	0	0	0	0	0	0	0
Peak7833	3L	10323641	10324322	intergenic	0.751264	0	0	1	0	0	0	0	0	0	0	0	0	0	0	0	0	0	0	0	0	0	0	0	0	0	0	0	0
Peak7836	3L	10356763	10357208	intergenic	0.564017	0	0	1	0	0	0	0	0	0	0	0	0	0	0	0	0	0	0	0	0	0	0	0	0	0	0	0	0
Peak7837	3L	10381269	10381602	intergenic	0.729098	0	0	1	0	0	0	0	0	0	0	0	0	0	0	0	0	0	0	0	0	0	0	0	0	0	0	0	0
Peak7841	3L	10447101	10447366	intergenic	0.819903	0	0	1	0	0	0	0	0	0	0	0	0	0	0	0	0	0	0	0	0	0	0	0	0	0	0	0	0
Peak7846	3L	10525229	10525742	intron	0.746822	0	0	1	0	0	1	0	0	0	0	0	0	0	0	0	0	0	0	0	0	0	0	0	0	0	0	0	0
Peak7869	3L	10664327	10664654	intron	0.852857	0	0	1	0	0	0	0	0	0	0	0	0	0	0	1	0	0	0	0	0	0	0	0	0	0	0	0	0
Peak7871	3L	10668000	10668394	intron	0.500727	0	0	1	0	0	0	0	0	0	0	0	0	0	0	0	0	0	0	0	0	0	0	0	0	0	0	0	0
Peak7872	3L	10668571	10669431	intron	0.891745	0	0	1	0	0	0	0	0	0	0	0	0	0	0	0	0	0	0	0	0	0	0	0	0	0	0	0	0
Peak7874	3L	10670419	10670843	intron	0.572855	0	0	1	0	0	0	0	0	0	0	0	0	0	0	0	0	0	0	0	0	0	0	0	0	0	0	0	0
Peak7875	3L	10671006	10671332	intron	0.903569	0	0	1	0	0	0	0	0	0	0	0	0	0	0	0	0	0	0	0	0	0	0	0	0	0	0	0	0
Peak7888	3L	10756777	10757239	intergenic	0.682097	0	0	1	0	0	0	0	0	0	0	0	0	0	0	0	0	0	0	0	0	0	0	0	0	0	0	0	0
Peak7893	3L	10835778	10836447	intergenic	0.677555	0	0	1	0	0	0	0	0	0	0	0	0	0	0	0	0	0	0	0	1	0	0	0	0	0	0	0	0
Peak7894	3L	10836642	10837266	intergenic	0.60765	0	0	1	0	0	0	0	0	0	0	0	0	0	0	1	0	0	1	1	0	0	1	0	0	0	0	0	0
Peak7895	3L	10837662	10838303	intergenic	0.546999	0	0	1	0	0	0	0	0	0	0	0	0	0	0	0	0	0	0	0	0	0	0	0	0	0	0	0	0
Peak7899	3L	10842848	10843581	intergenic	0.630133	0	0	1	0	0	0	0	0	0	0	0	0	0	0	0	0	0	0	0	0	0	0	0	0	0	0	0	0
Peak7901	3L	10845370	10846030	intergenic	0.414059	0	0	1	0	0	0	0	0	0	0	0	0	1	0	0	0	0	1	0	0	0	1	0	0	1	0	0	0
Peak7905	3L	10851863	10852130	intron	0.505873	0	0	1	0	0	0	0	0	0	0	0	0	0	1	0	0	0	0	0	1	0	1	0	0	0	0	0	0
Peak7917	3L	10951866	10952076	intergenic	1.17478	0	0	1	0	0	0	0	0	0	0	0	0	0	0	1	0	0	0	0	0	0	0	0	0	0	0	0	0
Peak7918	3L	10959390	10960165	intergenic	0.420422	0	0	1	0	0	0	0	0	0	0	0	0	0	0	0	0	0	0	0	0	0	0	0	0	0	0	0	0
Peak7922	3L	11003289	11004150	intergenic	0.467412	0	0	1	0	0	0	0	0	0	0	0	0	0	0	0	0	0	0	0	0	0	0	0	0	0	0	0	0
Peak7923	3L	11011919	11012231	intergenic	0.481858	0	0	1	0	0	0	0	0	0	0	0	0	0	0	0	0	0	0	0	0	0	0	0	0	0	0	0	0
Peak7926	3L	11038146	11038601	intron	0.660278	0	0	1	0	0	0	0	0	0	1	1	0	1	0	0	0	0	1	1	1	0	1	0	0	0	0	0	0
Peak7936	3L	11091195	11091465	promoter	0.471332	0	0	1	0	0	0	0	0	0	0	0	0	0	0	0	0	0	0	0	1	0	0	0	0	0	0	0	0
Peak7949	3L	11189884	11190317	intron	0.623083	0	0	1	0	0	0	0	0	0	0	0	0	0	0	0	0	0	0	0	0	0	1	0	0	0	0	0	0
Peak7950	3L	11190447	11191203	promoter	0.301882	0	0	1	0	0	1	0	0	0	0	0	0	0	0	0	0	0	0	0	0	0	0	0	0	0	0	0	0
Peak7953	3L	11201103	11201469	CDS	1.04816	0	0	1	0	0	0	0	0	0	0	0	0	0	0	0	0	0	0	0	0	0	0	0	0	0	0	0	0
Peak7958	3L	11231023	11231556	intergenic	0.38141	0	0	1	0	0	0	0	0	0	0	0	0	0	0	0	0	0	0	0	0	0	0	0	0	0	0	0	0
Peak7959	3L	11235251	11235588	intergenic	0.450326	0	0	1	0	0	0	0	0	0	0	0	0	0	0	0	0	0	0	1	0	0	1	0	0	0	0	0	0
Peak7963	3L	11239302	11239845	intergenic	0.400302	0	0	1	0	0	0	0	0	0	0	0	0	0	0	0	0	0	0	0	1	0	0	0	0	0	0	0	0
Peak7966	3L	11244784	11246141	promoter	0.36501	0	0	1	0	0	0	0	0	0	0	0	0	0	0	0	0	0	0	0	0	0	0	0	0	0	0	0	0
Peak7971	3L	11252754	11253486	intergenic	0.630019	0	0	1	0	0	0	0	0	0	0	0	0	0	0	0	0	0	0	0	0	0	0	0	0	0	0	0	0
Peak7973	3L	11254223	11254601	intergenic	0.803934	0	0	1	0	0	0	0	0	0	0	0	0	0	0	0	0	0	0	0	0	0	0	0	0	0	0	0	0
Peak7974	3L	11254722	11255298	intergenic	0.5966	0	0	1	0	0	0	0	0	0	0	0	0	0	0	0	0	0	0	0	0	0	0	0	0	0	0	0	0
Peak7977	3L	11291061	11291605	intergenic	0.433942	0	0	1	0	0	0	0	0	0	0	0	0	0	0	0	0	0	0	0	0	0	0	0	0	0	0	0	0
Peak7980	3L	11314378	11314572	CDS	1.05811	0	0	1	0	0	0	0	0	0	0	0	0	0	0	0	0	0	0	0	1	0	0	0	0	0	0	0	0
Peak7982	3L	11318048	11318320	intergenic	1.07587	0	0	1	0	0	0	0	0	0	0	0	0	0	0	0	0	0	0	0	0	0	0	0	0	0	0	0	0
Peak7983	3L	11335568	11336268	intergenic	1.0613	0	0	1	0	0	0	0	0	0	0	0	0	0	0	0	0	0	0	0	0	0	0	0	0	0	0	0	0
Peak7984	3L	11336500	11338304	intergenic	0.7541	0	0	1	0	0	0	0	0	0	0	1	0	1	0	0	0	0	0	0	1	0	1	0	0	0	0	0	0
Peak7985	3L	11349881	11350733	intergenic	0.71532	0	0	1	1	1	1	1	1	1	1	1	1	1	0	1	0	0	1	1	0	0	1	0	0	0	0	0	0
Peak7988	3L	11399666	11400223	intergenic	1.27699	0	0	1	0	0	0	0	0	0	0	0	0	0	0	0	0	0	0	1	1	0	0	0	0	0	0	0	0
Peak7989	3L	11407879	11408393	intergenic	0.814895	0	0	1	0	0	0	0	0	0	0	0	0	0	0	0	0	0	0	0	0	0	0	0	0	0	0	0	0
Peak7990	3L	11409613	11409885	intergenic	0.966284	0	0	1	0	0	0	0	0	0	0	0	0	0	0	0	0	0	0	0	0	0	0	0	0	0	0	0	0
Peak7991	3L	11411104	11411407	intergenic	0.643103	0	0	1	0	0	0	0	0	0	0	0	0	0	0	0	0	0	0	0	0	0	0	0	0	0	0	0	0
Peak7997	3L	11432460	11432715	intergenic	0.417867	0	0	1	0	1	0	0	0	0	1	0	0	0	0	1	1	0	0	1	1	0	1	0	0	0	0	0	0
Peak7998	3L	11455757	11456095	intergenic	0.914497	0	0	1	0	0	0	0	0	0	0	0	0	0	0	0	0	0	0	0	0	0	0	0	0	0	0	0	0
Peak7999	3L	11464875	11465201	intergenic	0.337205	0	0	1	0	0	0	0	0	0	0	0	0	0	0	0	0	0	0	0	0	0	0	0	0	0	0	0	0
Peak8002	3L	11484491	11485283	intron	1.06341	0	0	1	0	0	1	0	0	0	1	1	0	1	0	1	1	0	1	1	1	0	1	0	0	0	0	0	0
Peak8005	3L	11487633	11487861	CDS	0.706774	0	0	1	1	0	1	0	0	0	0	0	0	0	0	1	0	0	0	0	0	0	0	0	0	0	0	0	0
Peak8033	3L	11757934	11758574	intron	0.484524	0	0	1	0	0	0	0	0	0	0	0	0	0	0	0	0	0	0	1	0	0	1	0	0	0	0	0	0
Peak8039	3L	11812909	11813329	promoter	0.347557	0	0	1	0	0	0	0	0	0	0	0	0	0	0	0	0	0	0	0	1	0	0	0	0	0	0	0	0
Peak8054	3L	11827913	11828296	UTR	0.646147	0	0	1	0	0	0	0	0	0	0	0	0	0	0	0	0	0	0	0	1	0	1	0	0	0	0	0	0
Peak8055	3L	11831585	11831955	intergenic	0.914002	0	0	1	0	0	0	0	0	0	0	0	0	0	0	0	0	0	0	0	0	0	0	0	0	0	0	0	0
Peak8058	3L	11914274	11914480	intron	0.808524	0	0	1	0	0	0	0	0	0	0	0	0	0	0	0	0	0	0	0	0	0	0	0	0	0	0	0	0
Peak8059	3L	11918121	11919235	intron	1.05222	0	0	1	0	0	0	0	0	0	0	0	0	0	0	0	0	0	0	0	0	0	0	0	0	0	0	0	0
Peak8061	3L	11924230	11924858	intron	1.48074	0	0	1	0	0	0	0	0	0	0	0	0	0	0	0	0	0	0	0	0	0	0	0	0	0	0	0	0
Peak8062	3L	11925901	11926243	intron	0.618079	0	0	1	0	0	0	0	0	0	0	0	0	0	1	0	0	0	0	0	1	0	1	0	0	0	0	0	0
Peak8069	3L	12070744	12071149	intron	0.511508	0	0	1	0	0	0	0	0	0	0	0	0	0	0	0	0	0	0	0	0	0	0	0	0	0	0	0	0
Peak8072	3L	12075517	12075985	intergenic	0.816272	0	0	1	0	0	0	0	0	0	0	0	0	0	0	0	0	0	0	0	0	0	0	0	0	0	0	0	0
Peak8073	3L	12076131	12077041	intergenic	0.528425	0	0	1	0	0	0	0	0	0	0	1	0	1	0	0	0	0	0	0	1	0	1	0	0	0	0	0	0
Peak8076	3L	12094856	12095203	intergenic	1.04208	0	0	1	0	0	0	0	0	0	0	1	0	0	0	0	0	0	0	0	1	0	0	0	0	0	0	0	0
Peak8090	3L	12259060	12259591	intron	0.57389	0	0	1	0	0	0	0	0	0	0	0	0	0	0	0	0	0	0	0	0	0	0	0	0	0	0	0	0
Peak8092	3L	12260466	12261002	promoter	0.328055	0	0	1	0	0	0	0	0	0	0	0	0	0	0	0	0	0	0	0	0	0	0	0	0	0	0	0	0
Peak8093	3L	12266926	12267276	CDS	0.648142	0	0	1	0	0	0	0	0	0	0	0	0	0	0	0	0	0	0	0	0	0	0	0	0	0	0	0	0
Peak8096	3L	12321840	12322359	promoter	0.807689	0	0	1	0	0	0	0	0	0	0	1	0	0	0	0	0	0	0	0	1	0	0	0	0	0	0	1	0
Peak8108	3L	12460885	12461506	promoter	0.730795	0	0	1	0	1	0	0	0	0	1	1	0	0	1	0	1	0	0	1	1	0	0	0	0	1	0	1	0
Peak8110	3L	12487601	12488021	intron	1.60194	0	0	1	0	0	0	0	0	0	0	0	0	0	1	1	0	0	0	0	0	0	0	0	0	0	0	0	0
Peak8113	3L	12498729	12499674	CDS	0.453747	0	0	1	0	0	0	0	0	0	0	0	0	0	0	0	0	0	0	0	1	0	0	0	0	0	0	0	0
Peak8122	3L	12546638	12546990	intron	1.09003	0	0	1	0	0	0	0	0	0	0	1	0	0	0	0	0	0	0	0	1	0	0	0	0	0	0	0	0
Peak8123	3L	12559289	12560092	intron	0.911636	0	0	1	0	0	0	0	0	0	0	0	0	0	0	0	0	0	0	0	1	0	0	0	0	0	0	0	0
Peak8128	3L	12584656	12584985	intron	0.777784	0	0	1	0	0	0	0	0	0	1	0	0	0	0	1	1	0	0	1	1	0	0	0	0	0	0	0	0
Peak8131	3L	12618772	12618963	intergenic	0.970258	0	0	1	0	0	1	0	0	0	0	0	0	0	0	0	0	0	0	0	1	0	0	0	0	0	0	0	0
Peak8133	3L	12640122	12640782	UTR	0.826837	0	0	1	0	0	0	0	0	0	0	1	0	0	0	0	1	0	0	0	1	0	1	0	0	0	0	0	0
Peak8134	3L	12642129	12642990	intergenic	0.482738	0	0	1	0	0	0	0	0	0	0	0	0	0	0	0	0	0	0	0	0	0	0	0	0	0	0	0	0
Peak8138	3L	12665763	12666130	intergenic	1.15804	0	0	1	0	0	0	0	0	0	0	0	0	0	0	0	0	0	0	0	0	0	0	0	0	0	0	0	0
Peak8141	3L	12670473	12671017	intergenic	0.511766	0	0	1	0	0	0	0	0	0	0	0	0	0	0	0	0	0	0	0	0	0	0	0	0	0	0	0	0
Peak8142	3L	12676310	12676773	intergenic	1.22631	0	0	1	0	0	0	0	0	0	0	0	0	0	0	0	0	0	0	0	0	0	0	0	0	0	0	0	0
Peak8146	3L	12690566	12690993	intron	0.845429	0	0	1	0	0	0	0	0	0	0	0	0	0	0	0	0	0	0	0	0	0	0	0	0	0	0	0	0
Peak8147	3L	12696843	12697388	intron	0.94031	0	0	1	0	0	0	0	0	0	0	0	0	0	1	0	0	0	0	0	0	0	0	0	0	0	0	0	0
Peak8148	3L	12716601	12716944	intergenic	0.609148	0	0	1	0	0	0	0	0	0	0	0	0	0	1	0	0	0	0	0	0	0	0	0	0	0	0	0	0
[truncated: 2,283 more rows]

## Sheet: README
List of 4 282 differential high-confidence ATAC-seq peaks.
peakID	Peak ID (same as in Supplemental Table S4)
chr	Genomic coordinates: chromosome name
start	Genomic coordinates: start position
end	Genomic coordinates: end position
annotation	Geomic annotation (as in Fig. 4A)
maxLog2	Maximum reported log2 fold-change
D1control	Pair-wise comparison. D1 domain vs. whole-embryo control. 1: significant signal difference. 0: non-significant signal difference.
D2control	Pair-wise comparison. D2 domain vs. whole-embryo control. 1: significant signal difference. 0: non-significant signal difference.
D3control	Pair-wise comparison. D3 domain vs. whole-embryo control. 1: significant signal difference. 0: non-significant signal difference.
D4control	Pair-wise comparison. D4 domain vs. whole-embryo control. 1: significant signal difference. 0: non-significant signal difference.
D5control	Pair-wise comparison. D5 domain vs. whole-embryo control. 1: significant signal difference. 0: non-significant signal difference.
D6control	Pair-wise comparison. D6 domain vs. whole-embryo control. 1: significant signal difference. 0: non-significant signal difference.
D7control	Pair-wise comparison. D7 domain vs. whole-embryo control. 1: significant signal difference. 0: non-significant signal difference.
D1D2	Pair-wise comparison. D1 domain vs. D2 domain. 1: significant signal difference. 0: non-significant signal difference.
D1D3	Pair-wise comparison. D1 domain vs. D3 domain. 1: significant signal difference. 0: non-significant signal difference.
D1D4	Pair-wise comparison. D1 domain vs. D4 domain. 1: significant signal difference. 0: non-significant signal difference.
D1D5	Pair-wise comparison. D1 domain vs. D5 domain. 1: significant signal difference. 0: non-significant signal difference.
D1D6	Pair-wise comparison. D1 domain vs. D6 domain. 1: significant signal difference. 0: non-significant signal difference.
D1D7	Pair-wise comparison. D1 domain vs. D7 domain. 1: significant signal difference. 0: non-significant signal difference.
D2D3	Pair-wise comparison. D2 domain vs. D3 domain. 1: significant signal difference. 0: non-significant signal difference.
D2D4	Pair-wise comparison. D2 domain vs. D4 domain. 1: significant signal difference. 0: non-significant signal difference.
D2D5	Pair-wise comparison. D2 domain vs. D5 domain. 1: significant signal difference. 0: non-significant signal difference.
D2D6	Pair-wise comparison. D2 domain vs. D6 domain. 1: significant signal difference. 0: non-significant signal difference.
D2D7	Pair-wise comparison. D2 domain vs. D7 domain. 1: significant signal difference. 0: non-significant signal difference.
D3D4	Pair-wise comparison. D3 domain vs. D4 domain. 1: significant signal difference. 0: non-significant signal difference.
D3D5	Pair-wise comparison. D3 domain vs. D5 domain. 1: significant signal difference. 0: non-significant signal difference.
D3D6	Pair-wise comparison. D3 domain vs. D6 domain. 1: significant signal difference. 0: non-significant signal difference.
D3D7	Pair-wise comparison. D3 domain vs. D7 domain. 1: significant signal difference. 0: non-significant signal difference.
D4D5	Pair-wise comparison. D4 domain vs. D5 domain. 1: significant signal difference. 0: non-significant signal difference.
D4D6	Pair-wise comparison. D4 domain vs. D6 domain. 1: significant signal difference. 0: non-significant signal difference.
D4D7	Pair-wise comparison. D4 domain vs. D7 domain. 1: significant signal difference. 0: non-significant signal difference.
D5D6	Pair-wise comparison. D5 domain vs. D6 domain. 1: significant signal difference. 0: non-significant signal difference.
D5D7	Pair-wise comparison. D5 domain vs. D7 domain. 1: significant signal difference. 0: non-significant signal difference.
D6D7	Pair-wise comparison. D6 domain vs. D7 domain. 1: significant signal difference. 0: non-significant signal difference.
