# Supplementary material for: ATAC-seq reveals regional differences in enhancer accessibility during the establishment of spatial coordinates in the Drosophila blastoderm
Source: HighWire-hosted journal article supplement (doi:10.1101/gr.242362.118), 2019-04-08
Supplement: Supplemental_Table_S8.xlsx [file Supplemental_Table_S8.xlsx]

## Sheet: Data
Name	chr	start	end	REDfly_name	Reference	Target_gene	Class_gene	Coefficient	Slope	Corr_Coefficient	Corr_Slope
Abd-B_(+11)	3R	12745522	12747731	VT42848	Kvon et al. 2014	Abd-B	homeotic	0.954	2.366	NA	NA
Abd-B_(+30)	3R	12726430	12728642	VT42837	Kvon et al. 2014	Abd-B	homeotic	0.962	1.486	NA	NA
Antp_(-16)	3R	2774228	2775839	Antp_4	Kazemian et al. 2010	Antp	homeotic	0.74	1.546	NA	NA
Blimp-1_(+7)	3L	5616300	5617332	Cluster-8331	Fisher et al. 2012	Blimp-1	downstream	0.932	6.543	NA	NA
Blimp-1_(+9)	3L	5614588	5615641	Cluster-8307	Fisher et al. 2012	Blimp-1	downstream	0.836	1.214	NA	NA
bowl_(+3)	2L	3774540	3777027	Cluster-8198	Fisher et al. 2012	bowl	downstream	0.677	1.547	NA	NA
btd_(+3)	X	9584455	9585527	Btd_Ss-Bg	Wimmer et al. 1995	btd	gap	0.855	1.341	NA	NA
cad_(+2)	2L	20768045	20769545	ChIP_AHD2	Fisher et al. 2012	cad	gap	0.704	2.199	NA	NA
D_(+4)	3L	14166136	14167860	D_(+5)	Schroeder et al. 2004	D	gap	0.582	0.95	0.582	0.553
Dfd_(-13)	3R	2630027	2631527	Scr_ChIP-miRNA9	Fisher et al. 2012	Dfd	homeotic	0.923	2.41	NA	NA
ems_(-9)	3R	9736403	9737444	Unspecified HC_18	Chen et al. 2012	ems	gap	0.619	6.313	NA	NA
ems_(+22)	3R	9705258	9706352	Unspecified HC_25	Chen et al. 2012	ems	gap	0.951	3.117	NA	NA
eve_(-5)_broad	2R	5870741	5872141	eve_construct20	Fujioka et al. 1999	eve	pair_rule	0.91	4.514	NA	NA
eve_(-5)_narrow	2R	5871404	5871999	eve_stripe_4_6	Fujioka et al. 1999	eve	pair_rule	0.942	7.338	NA	NA
eve_(-7)	2R	5873439	5874233	eve_stripe1-construct1/2	Fujioka et al. 1999	eve	pair_rule	0.923	12.414	0.901	5.828
eve_(-8)_broad	2R	5874141	5875341	eve_construct30	Fujioka et al. 1999	eve	pair_rule	0.834	5.404	0.579	1.614
eve_(-8)_narrow	2R	5874221	5874834	eve_stripe5	Fujioka et al. 1999	eve	pair_rule	0.925	9.981	0.902	3.961
eve_(+1)	2R	5865267	5865750	eve_stripe_2	Small et al. 1992	eve	pair_rule	0.792	10.507	0.405	2.358
eve_(+4)	2R	5863006	5863516	eve_stripe_3+7	Small et al. 1996	eve	pair_rule	0.891	4.014	NA	NA
fkh_(-2)	3R	24411719	24413426	fkh_-2_construct	Schroeder et al. 2004	fkh	pair_rule	0.357	4.355	NA	NA
fkh_(-4)	3R	24413511	24415247	fkh_distal_-4	Perry et al. 2011	fkh	pair_rule	0.882	5.018	NA	NA
ftz_(-3)	3R	2692616	2694360	ftz_(+3)	Schroeder et al. 2011	fkh	pair_rule	0.627	2.107	NA	NA
ftz_(-4)	3R	2693265	2694696	ftz_CE8024	Berman et al. 2004	fkh	pair_rule	0.58	4.22	NA	NA
ftz_(+7)	3R	2681761	2683378	ftz_(-7)	Schroeder et al. 2011	fkh	pair_rule	0.906	1.161	NA	NA
gt_(-1)	X	2323048	2324286	gt_-1_construct	Schroeder et al. 2004	gt	gap	0.882	2.218	NA	NA
gt_(-10)	X	2331789	2333533	gt_-10_construct	Schroeder et al. 2004	gt	gap	0.931	2.011	NA	NA
gt_(-2)_broad	X	2324294	2325502	gt_-3_construct	Schroeder et al. 2004	gt	gap	0.754	9.731	0.844	4.781
gt_(-2)_narrow	X	2324617	2325714	gt_CE8001	Berman et al. 2004	gt	gap	0.786	11.156	0.873	5.825
gt_(-5)_broad	X	2327322	2329503	gt_-6_construct	Schroeder et al. 2004	gt	gap	0.557	3.324	NA	NA
gt_(-5)_narrow	X	2327975	2328778	gt_gt1	Ochoa-Espinosa et al. 2005	gt	gap	0.626	6.011	NA	NA
h_(-12)	3L	8680591	8681060	h_stripe0	Ochoa-Espinosa et al. 2005	h	pair_rule	0.933	7.13	NA	NA
h_(+10)	3L	8658178	8659109	h_h7_element	La Rosee et al. 1997	h	pair_rule	0.97	3.481	NA	NA
h_(+11)_broad	3L	8656630	8658374	h_stripe_3+4_ET22	Howard & Struhl 1990	h	pair_rule	0.943	3.819	NA	NA
h_(+11)_narrow	3L	8657463	8657938	h_stripe3_ET38	Howard & Struhl 1990	h	pair_rule	0.942	11.215	NA	NA
h_(+5)	3L	8662070	8664900	h_betah1(2)5	Riddihough & Ish-Horowicz 1991	h	pair_rule	-0.109	-0.572	NA	NA
h_(+9)	3L	8659411	8660491	h_stripe_6+2	Howard & Struhl 1990	h	pair_rule	0.853	4.636	NA	NA
hb_(-2)_broad	3R	4524484	4526003	hb_distal_nonminimal	Perry et al. 2011	hb	gap	0.872	5.646	NA	NA
hb_(-2)_narrow	3R	4524620	4525479	Unspecified_HC_01	Chen et al. 2012	hb	gap	0.918	8.684	NA	NA
hb_(-4)	3R	4526522	4527945	hb_upstream_enhancer (HZ1.4)	Margolis et al. 1995	hb	gap	0.65	5.365	NA	NA
hb_(-4)_downstream	3R	4526520	4526862	hb_HZ340	Margolis et al. 1995	hb	gap	0.748	8.769	NA	NA
hb_(-4)_upstream	3R	4526861	4527388	hb_HZ526	Margolis et al. 1995	hb	gap	0.829	16.37	NA	NA
hb_(+0)_broad	3R	4519856	4520626	hb_proximal	Perry et al. 2011	hb	gap	0.501	3.412	0.232	0.997
hb_(+0)_narrow	3R	4519886	4521119	hb_1.2	Schröder et al. 1988	hb	gap	0.491	2.343	0.233	0.656
hbn_(-1)	2R	16849286	16850294	Unspecified_HC_14	Chen et al. 2012	hbn	downstream	0.584	2.732	NA	NA
hkb_(-2)	3R	173892	174474	hkb_0.6kbRIRV	Hader et al. 2000	hkb	gap	0.379	7.432	NA	NA
hkb_(+6)	3R	165647	167219	hkb_distal_+6kb	Perry et al. 2011	hkb	gap	-0.035	-0.145	NA	NA
kni_(-2)_broad	3L	20689644	20690670	kni_distal	Perry et al. 2011	kni	gap	0.867	3.234	NA	NA
kni_(-2)_narrow	3L	20689643	20690512	kni_KD	Pankratz et al. 1992	kni	gap	0.694	2.624	NA	NA
kni_(+0)	3L	20687687	20688345	kni_proximal_minimal	Perry et al. 2011	kni	gap	0.95	2.26	NA	NA
Kr_(-11)	2R	21124126	21125171	Kr_Cluster-8297	Fisher et al. 2012	Kr	gap	0.52	0.278	NA	NA
Kr_(+0)	2R	21113281	21115489	Kr_Kr/E	Jacob et al. 1991	Kr	gap	-0.22	-1.448	NA	NA
Kr_(+1)	2R	21112355	21113940	Kr_proximal	Perry et al. 2011	Kr	gap	0.663	1.964	NA	NA
Kr_(+2)	2R	21111575	21113281	Kr_NcS1.7HZ	Hoch et al. 1990	Kr	gap	0.685	1.559	NA	NA
Kr_(+3)	2R	21110142	21111300	Kr_CD1	Hoch et al. 1990	Kr	gap	0.788	3.683	0.687	1.305
noc_(+1)	2L	14489159	14489648	Unspecified_HC_34	Chen et al. 2012	noc	gap	0.755	3.972	NA	NA
nub_(+2)	2L	12615792	12617776	nub_-2_construct	Schroeder et al. 2004	nub	gap	0.915	1.76	NA	NA
oc_(-1)	X	8537082	8538914	oc_+7_construct	Schroeder et al. 2004	oc	gap	0.862	5.44	NA	NA
oc_(-4)	X	8547936	8549796	oc_otd_early_enhancer	Gao and Finkelstein 1998	oc	gap	0.538	2.512	NA	NA
oc_(+0)	X	8536987	8537940	oc_intronic_distal	Perry et al. 2011	oc	gap	0.831	4.6	NA	NA
odd_(-3)_broad	2L	3608812	3610461	odd_-3_construct	Schroeder et al. 2004	odd	pair_rule	0.862	4.56	NA	NA
odd_(-3)_narrow	2L	3608835	3610207	odd_CE8010	Berman et al. 2004	odd	pair_rule	0.901	2.883	NA	NA
odd_(-4)	2L	3610420	3611803	odd_-5_construct	Schroeder et al. 2004	odd	pair_rule	0.288	2.052	NA	NA
pdm2_(-1)	2L	12678898	12680520	pdm2_+1_construct	Schroeder et al. 2004	pdm2	gap	0.326	0.174	NA	NA
prd_(-3)	2L	12088746	12089847	Unspecified_HC_03	Chen et al. 2012	prd	pair_rule	0.771	2.039	NA	NA
prd_(-6)	2L	12091700	12092777	prd_Cluster-8520	Fisher et al. 2012	prd	pair_rule	0.548	1.08	NA	NA
prd_(+4)	2L	12080488	12081888	prd_O-E	Ochoa-Espinosa et al. 2005	prd	pair_rule	0.757	2.5	NA	NA
rib_(+2)	2R	15160750	15161413	Unspecified_HC_11	Chen et al. 2012	rib	downstream	0.814	10.095	NA	NA
run_(+10)	X	20554215	20556618	run_stripe3+7	Klingler et al. 1996	run	pair_rule	0.933	0.798	NA	NA
run_(+14)	X	20551039	20552649	run_stripe1+7	Klingler et al. 1996	run	pair_rule	0.876	1.442	NA	NA
run_(+17)	X	20548261	20549257	run_(-17)	Schroeder et al. 2011	run	pair_rule	0.96	3.175	NA	NA
run_(+19)	X	20583284	20585544	run_(+19)	Schroeder et al. 2011	run	pair_rule	0.821	0.412	NA	NA
run_(+30)	X	20594595	20597303	run_(+30)	Schroeder et al. 2011	run	pair_rule	0.716	1.156	NA	NA
run_(+31)	X	20533075	20535598	run_(-31)	Schroeder et al. 2011	run	pair_rule	0.954	2.389	NA	NA
run_(+41)	X	20523501	20524783	run_(-41)	Schroeder et al. 2011	run	pair_rule	0.923	1.171	NA	NA
run_(+42)	X	20522461	20523683	run_(-42)	Schroeder et al. 2011	run	pair_rule	0.946	1.646	NA	NA
run_(+9)	X	20555735	20556596	run_(-10)	Schroeder et al. 2011	run	pair_rule	0.956	3.266	NA	NA
slp1_(-4)	2L	3828818	3829610	slp1_slp_B	Ochoa-Espinosa et al. 2005	slp1	pair_rule	0.898	5.04	NA	NA
slp1_(+1)	2L	3824596	3824967	slp1_slp_A	Ochoa-Espinosa et al. 2005	slp1	pair_rule	0.882	1.907	NA	NA
slp2_(+3)	2L	3833484	3834592	Unspecified_HC_02	Chen et al. 2012	slp2	pair_rule	0.867	3.45	NA	NA
SoxN_(-7)	2L	8831698	8833198	SoxN_ChIP-50	Fisher et al. 2012	SoxN	downstream	0.938	3.735	NA	NA
tara_(-9)	3R	12076498	12077998	tara_ChIP-37	Fisher et al. 2012	tara	downstream	0.42	0.478	NA	NA
tll_(+1)	3R	26675738	26678501	tll_P2	Liaw and Lengyel 1993	tll	gap	0.697	1.39	NA	NA
tll_(+2)	3R	26675091	26676127	Unspecified_HC_07	Chen et al. 2012	tll	gap	0.877	20.559	NA	NA
tll_(+3)	3R	26675104	26675738	tll_K10	Rudolph et al. 1997	tll	gap	0.868	13.759	NA	NA
tll_(+4)	3R	26673281	26675739	tll_K2	Rudolph et al. 1997	tll	gap	0.803	2.709	NA	NA
Tollo_(+12)	3L	15216686	15217594	Unspecified_HC_23	Chen et al. 2012	Tollo	downstream	0.768	5.794	NA	NA
tsh_(-49)	2L	21876631	21877660	Unspecified_HC_17	Chen et al. 2012	tsh	downstream	0.385	0.833	NA	NA
Ubx_(-10)	3R	12570248	12571305	Ubx_Cluster-8166	Fisher et al. 2012	Ubx	homeotic	0.936	3.364	NA	NA

## Sheet: README
List of 88 AP enhancers.
Name	Enhancer name used in this study
chr	Genomic coordinates: chromosome name
start	Genomic coordinates: start position
end	Genomic coordinates: end position
REDfly_name	REDfly identifier of the enhancer (REDfly v. 5.4.3, Gallo et al. 2011)
Reference	Reference of the original study that identified and characterized the enhancer. Source of the in situ hybridization image used for estimation of the activity pattern.
Target_gene	Name of the enhancer's target gene
Class_gene	Classification of the target gene according to the position in the AP gene regulatory network (gap, pair-rule, homeotic, secondary downstream gene)
Coefficient	Pearson's correlation coefficient of the linear regression
Slope	Slope of the linear regression
Corr_coefficient	Corrected Pearson's correlation coefficient (for enhancers overlapping drivers of the nuclear tag)
Corr_slope	Corrected slope of the linear regression (for enhancers overlapping drivers of the nuclear tag).
References:
Berman BP, Pfeiffer BD, Laverty TR, Salzberg SL, Rubin GM, Eisen MB, Celniker SE. 2004. Computational identification of developmental enhancers: conservation and function of transcription factor binding-site clusters in Drosophila melanogaster and Drosophila pseudoobscura. Genome Biol 5: R61.
Chen H, Xu Z, Mei C, Yu D, Small S. 2012. A system of repressor gradients spatially organizes the boundaries of bicoid-dependent target genes. Cell 149: 618–629.
Fisher WW, Li JJ, Hammonds AS, Brown JB, Pfeiffer BD, Weiszmann R, MacArthur S, Thomas S, Stamatoyannopoulos JA, Eisen MB, et al. 2012. DNA regions bound at low occupancy by transcription factors do not drive patterned reporter gene expression in Drosophila. Proc Natl Acad Sci 109: 21330–21335.
Fujioka M, Emi-sarker Y, Yusibova GL, Goto T, Jaynes JB. 1999. Analysis of an even-skipped rescue transgene reveals both composite and discrete neuronal and early blastoderm enhancers , and multi-stripe positioning by gap gene repressor gradients. Development 2538: 2527–2538.
Gao Q, Finkelstein R. 1998. Targeting gene expression to the head: the Drosophila orthodenticle gene is a direct target of the Bicoid morphogen. Development 125: 4185–93.
Gallo SM, Gerrard DT, Miner D, Simich M, Des Soye B, Bergman CM, Halfon MS. 2011. REDfly v3.0: Toward a comprehensive database of transcriptional regulatory elements in Drosophila. Nucleic Acids Res 39: 118–123.
Häder T, Wainwright D, Shandala T, Saint R, Taubert H, Brönner G, Jäckle H. 2000. Receptor tyrosine kinase signaling regulates different modes of Groucho-dependent control of Dorsal. Curr Biol 10: 51–54.
Hoch M, Schröder C, Seifert E, Jäckle H. 1990. cis-acting control elements for Krüppel expression in the Drosophila embryo. EMBO J 9: 2587–95.
Howard KR, Struhl G. 1990. Decoding positional information: regulation of the pair-rule gene hairy. Development 110: 1223–31.
Jacob Y, Sather S, Martin JR, Ollo R. 1991. Analysis of Krüppel control elements reveals that localized expression results from the interaction of multiple subelements. Proc Natl Acad Sci U S A 88: 5912–5916.
Kazemian M, Blatti C, Richards A, McCutchan M, Wakabayashi-Ito N, Hammonds AS, Celniker SE, Kumar S, Wolfe SA, Brodsky MH, et al. 2010. Quantitative analysis of the Drosophila segmentation regulatory network using pattern generating potentials. PLoS Biol 8: 51–52.
Klingler M, Soong J, Butler B, Gergen JP. 1996. Disperse versus compact elements for the regulation of runt stripes in Drosophila. Dev Biol 177: 73–84.
Kvon EZ, Kazmar T, Stampfel G, Yáñez-Cuna JO, Pagani M, Schernhuber K, Dickson BJ, Stark A. 2014. Genome-scale functional characterization of Drosophila developmental enhancers in vivo. Nature 512: 91–95.
La Rosée A, Häder T, Taubert H, Rivera-Pomar R, Jäckle H. 1997. Mechanism and Bicoid-dependent control of hairy stripe 7 expression in the posterior region of the Drosophila embryo. EMBO J 16: 4403–4411.
Margolis JS, Borowsky ML, Steingrímsson E, Shim CW, Lengyel JA, Posakony JW. 1995. Posterior stripe expression of hunchback is driven from two promoters by a common enhancer element. Development 121: 3067–3077.
Ochoa-Espinosa A, Yucel G, Kaplan L, Pare A, Pura N, Oberstein A, Papatsenko D, Small S. 2005. The role of binding site cluster strength in Bicoid-dependent patterning in Drosophila. Proc Natl Acad Sci U S A 102: 4960–4965.
Pankratz MJ, Busch M, Hoch M, Seifert E, Jäckle H. 1992. Spatial control of the gap gene knirps in the Drosophila embryo by posterior morphogen system. Science (80- ) 255: 986–989.
Perry MW, Boettiger AN, Levine M. 2011. Multiple enhancers ensure precision of gap gene-expression patterns in the Drosophila embryo. Proc Natl Acad Sci 108: 13570–13575.
Riddihough G, Ish-Horowicz D. 1991. Individual stripe regulatory elements in the Drosophila hairy promoter respond to maternal, gap, and pair-rule genes. Genes Dev 5: 840–854.
Rudolph KM, Liaw G-J, Daniel A, Green P, Courey AJ, Hartenstein V, Lengyel JA. 1997. Complex regulatory region mediating tailless expression in early embryonic patterning and brain development. Development 124: 4297–4308.
Schröder C, Tautz D, Seifert E, Jäckle H. 1988. Differential regulation of the two transcripts from the Drosophila gap segmentation gene hunchback. EMBO J 7: 2881–7.
Schroeder MD, Greer C, Gaul U. 2011. How to make stripes: deciphering the transition from non-periodic to periodic patterns in Drosophila segmentation. Development 138: 3067–3078.
Schroeder MD, Pearce M, Fak J, Fan H, Unnerstall U, Emberly E, Rajewsky N, Siggia ED, Gaul U. 2004. Transcriptional control in the segmentation gene network of Drosophila. PLoS Biol 2: e271.
Small S, Blair A, Levine M. 1992. Regulation of even-skipped stripe 2 in the Drosophila embryo. EMBO J 11: 4047–57.
Small S, Blair A, Levine M. 1996. Regulation of two pair-rule stripes by a single enhancer in the Drosophila embryo. Dev Biol 175: 314–324.
Wimmer EA, Simpson-Brose M, Cohen SM, Desplan C, Jäckle H. 1995. Trans- and cis-acting requirements for blastodermal expression of the head gap gene buttonhead. Mech Dev 53: 235–245.
